# Supplementary material
Source: publisher figshare collection journal article supplement (https://acs.figshare.com/ndownloader/files/9372184)
Supplement: Supplementary file 1 [file 9372184]

 
data_t_a
 
_audit_creation_method            'SHELXL-2014/7'
_shelx_SHELXL_version_number      '2014/7'
_chemical_name_systematic         ?
_chemical_name_common             ?
_chemical_melting_point           ?
_chemical_formula_moiety          'C21 H22 N2 O Si'
_chemical_formula_sum
 'C21 H22 N2 O Si' 
_chemical_formula_weight          346.49

loop_
 _atom_type_symbol
 _atom_type_description
 _atom_type_scat_dispersion_real
 _atom_type_scat_dispersion_imag
 _atom_type_scat_source
 'C'  'C'   0.0181   0.0091
 'International Tables Vol C Tables 4.2.6.8 and 6.1.1.4'
 'H'  'H'   0.0000   0.0000
 'International Tables Vol C Tables 4.2.6.8 and 6.1.1.4'
 'N'  'N'   0.0311   0.0180
 'International Tables Vol C Tables 4.2.6.8 and 6.1.1.4'
 'O'  'O'   0.0492   0.0322
 'International Tables Vol C Tables 4.2.6.8 and 6.1.1.4'
 'Si'  'Si'   0.2541   0.3302
 'International Tables Vol C Tables 4.2.6.8 and 6.1.1.4'
 
_space_group_crystal_system       monoclinic
_space_group_IT_number            14
_space_group_name_H-M_alt         'P 21/n'
_space_group_name_Hall            '-P 2yn'
 
_shelx_space_group_comment
;
The symmetry employed for this shelxl refinement is uniquely defined
by the following loop, which should always be used as a source of
symmetry information in preference to the above space-group names.
They are only intended as comments.
;
 
loop_
 _space_group_symop_operation_xyz
 'x, y, z'
 '-x+1/2, y+1/2, -z+1/2'
 '-x, -y, -z'
 'x-1/2, -y-1/2, z-1/2'
 
_cell_length_a                    11.9573(3)
_cell_length_b                    11.2275(3)
_cell_length_c                    14.8598(4)
_cell_angle_alpha                 90
_cell_angle_beta                  98.9260(10)
_cell_angle_gamma                 90
_cell_volume                      1970.78(9)
_cell_formula_units_Z             4
_cell_measurement_temperature     173(2)
_cell_measurement_reflns_used     9958
_cell_measurement_theta_min       3.74
_cell_measurement_theta_max       68.40
 
_exptl_crystal_description        block
_exptl_crystal_colour             colorless
_exptl_crystal_density_meas       ?
_exptl_crystal_density_method     ?
_exptl_crystal_density_diffrn     1.168          
_exptl_crystal_F_000              736
_exptl_transmission_factor_min    ?
_exptl_transmission_factor_max    ?
_exptl_crystal_size_max           0.220
_exptl_crystal_size_mid           0.200
_exptl_crystal_size_min           0.150
_exptl_absorpt_coefficient_mu     1.121
_shelx_estimated_absorpt_T_min    0.791
_shelx_estimated_absorpt_T_max    0.850
_exptl_absorpt_correction_type    ?
_exptl_absorpt_correction_T_min   ?
_exptl_absorpt_correction_T_max   ?
_exptl_absorpt_process_details    ?
_exptl_absorpt_special_details    ?
_diffrn_ambient_temperature       173(2)
_diffrn_radiation_wavelength      1.54178
_diffrn_radiation_type            CuK\a
_diffrn_source                    ?
_diffrn_measurement_device_type   'Bruker D8 VENTURE CMOS photon 100'
_diffrn_measurement_method        '\f and \w scans'
_diffrn_detector_area_resol_mean  ?
_diffrn_reflns_number             16204
_diffrn_reflns_av_unetI/netI      0.0159
_diffrn_reflns_av_R_equivalents   0.0215
_diffrn_reflns_limit_h_min        -14
_diffrn_reflns_limit_h_max        13
_diffrn_reflns_limit_k_min        -13
_diffrn_reflns_limit_k_max        13
_diffrn_reflns_limit_l_min        -17
_diffrn_reflns_limit_l_max        17
_diffrn_reflns_theta_min          5.157
_diffrn_reflns_theta_max          68.395
_diffrn_reflns_theta_full         67.679
_diffrn_measured_fraction_theta_max   0.992
_diffrn_measured_fraction_theta_full  0.993
_diffrn_reflns_Laue_measured_fraction_max    0.992
_diffrn_reflns_Laue_measured_fraction_full   0.993
_diffrn_reflns_point_group_measured_fraction_max   0.992
_diffrn_reflns_point_group_measured_fraction_full  0.993
_reflns_number_total              3602
_reflns_number_gt                 3376
_reflns_threshold_expression      'I > 2\s(I)'
_reflns_Friedel_coverage          0.000
_reflns_Friedel_fraction_max      .
_reflns_Friedel_fraction_full     .
 
_reflns_special_details
;
 Reflections were merged by SHELXL according to the crystal
 class for the calculation of statistics and refinement.
 
 _reflns_Friedel_fraction is defined as the number of unique
 Friedel pairs measured divided by the number that would be
 possible theoretically, ignoring centric projections and
 systematic absences.
;
 
_computing_data_collection        ?
_computing_cell_refinement        ?
_computing_data_reduction         ?
_computing_structure_solution     ?
_computing_structure_refinement 'SHELXL-2014/7 (Sheldrick, 2014)'
_computing_molecular_graphics     ?
_computing_publication_material   ?
_refine_special_details           ?
_refine_ls_structure_factor_coef  Fsqd
_refine_ls_matrix_type            full
_refine_ls_weighting_scheme       calc
_refine_ls_weighting_details
'w=1/[\s^2^(Fo^2^)+(0.0723P)^2^+0.9820P] where P=(Fo^2^+2Fc^2^)/3'
_atom_sites_solution_primary      ?
_atom_sites_solution_secondary    ?
_atom_sites_solution_hydrogens    geom
_refine_ls_hydrogen_treatment     constr
_refine_ls_extinction_method      'SHELXL-2014/7 (Sheldrick 2014'
_refine_ls_extinction_coef        0.0300(16)
_refine_ls_extinction_expression
 'Fc^*^=kFc[1+0.001xFc^2^\l^3^/sin(2\q)]^-1/4^'
_refine_ls_number_reflns          3602
_refine_ls_number_parameters      230
_refine_ls_number_restraints      0
_refine_ls_R_factor_all           0.0502
_refine_ls_R_factor_gt            0.0481
_refine_ls_wR_factor_ref          0.1258
_refine_ls_wR_factor_gt           0.1236
_refine_ls_goodness_of_fit_ref    1.023
_refine_ls_restrained_S_all       1.023
_refine_ls_shift/su_max           0.000
_refine_ls_shift/su_mean          0.000
 
loop_
 _atom_site_label
 _atom_site_type_symbol
 _atom_site_fract_x
 _atom_site_fract_y
 _atom_site_fract_z
 _atom_site_U_iso_or_equiv
 _atom_site_adp_type
 _atom_site_occupancy
 _atom_site_site_symmetry_order  
 _atom_site_calc_flag
 _atom_site_refinement_flags_posn
 _atom_site_refinement_flags_adp
 _atom_site_refinement_flags_occupancy
 _atom_site_disorder_assembly
 _atom_site_disorder_group
Si1 Si 0.09932(4) 0.77307(5) 0.24196(4) 0.0419(2) Uani 1 1 d . . . . .
C1 C 0.23559(12) 0.53628(13) 0.46122(9) 0.0241(3) Uani 1 1 d . . . . .
N1 N 0.47392(12) 0.69313(14) 0.19667(10) 0.0390(4) Uani 1 1 d . . . . .
O1 O 0.33041(11) 0.79280(11) 0.47656(8) 0.0404(3) Uani 1 1 d . . . . .
N2 N 0.37601(11) 0.73393(11) 0.33998(9) 0.0273(3) Uani 1 1 d . . . . .
H2A H 0.3579 0.6808 0.2966 0.033 Uiso 1 1 calc R U . . .
C2 C 0.14481(13) 0.46221(14) 0.47225(11) 0.0321(4) Uani 1 1 d . . . . .
H2 H 0.0732 0.4745 0.4358 0.039 Uiso 1 1 calc R U . . .
C5 C 0.35280(14) 0.42383(15) 0.57914(11) 0.0350(4) Uani 1 1 d . . . . .
H5 H 0.4243 0.4108 0.6156 0.042 Uiso 1 1 calc R U . . .
C4 C 0.26181(16) 0.35143(16) 0.58942(12) 0.0398(4) Uani 1 1 d . . . . .
H4 H 0.2706 0.2888 0.6329 0.048 Uiso 1 1 calc R U . . .
C3 C 0.15822(15) 0.37099(16) 0.53593(12) 0.0399(4) Uani 1 1 d . . . . .
H3 H 0.0956 0.3215 0.5428 0.048 Uiso 1 1 calc R U . . .
C6 C 0.33970(13) 0.51523(14) 0.51579(10) 0.0286(3) Uani 1 1 d . . . . .
H6 H 0.4026 0.5644 0.5094 0.034 Uiso 1 1 calc R U . . .
C8 C 0.13576(13) 0.64950(14) 0.32648(11) 0.0297(3) Uani 1 1 d . . . . .
H8 H 0.0837 0.5850 0.3196 0.036 Uiso 1 1 calc R U . . .
C7 C 0.22201(12) 0.63624(12) 0.39470(10) 0.0237(3) Uani 1 1 d . . . . .
C9 C -0.05604(18) 0.7957(2) 0.2369(2) 0.0702(8) Uani 1 1 d . . . . .
H9A H -0.0832 0.8526 0.1884 0.105 Uiso 1 1 calc R U . . .
H9B H -0.0712 0.8269 0.2954 0.105 Uiso 1 1 calc R U . . .
H9C H -0.0953 0.7195 0.2243 0.105 Uiso 1 1 calc R U . . .
C10 C 0.17115(19) 0.91691(18) 0.2762(2) 0.0692(7) Uani 1 1 d . . . . .
H10A H 0.2483 0.9153 0.2616 0.104 Uiso 1 1 calc R U . . .
H10B H 0.1741 0.9288 0.3418 0.104 Uiso 1 1 calc R U . . .
H10C H 0.1289 0.9824 0.2431 0.104 Uiso 1 1 calc R U . . .
C11 C 0.1344(2) 0.7238(3) 0.12995(16) 0.0715(8) Uani 1 1 d . . . . .
H11A H 0.0983 0.6468 0.1135 0.107 Uiso 1 1 calc R U . . .
H11B H 0.2166 0.7157 0.1341 0.107 Uiso 1 1 calc R U . . .
H11C H 0.1067 0.7829 0.0833 0.107 Uiso 1 1 calc R U . . .
C12 C 0.31419(12) 0.72962(13) 0.40920(10) 0.0261(3) Uani 1 1 d . . . . .
C13 C 0.46475(12) 0.81126(14) 0.32784(11) 0.0297(4) Uani 1 1 d . . . . .
C14 C 0.51481(13) 0.78730(14) 0.24873(11) 0.0308(4) Uani 1 1 d . . . . .
C15 C 0.60553(13) 0.85979(17) 0.22941(12) 0.0378(4) Uani 1 1 d . . . . .
C16 C 0.64423(15) 0.95403(17) 0.28914(14) 0.0453(5) Uani 1 1 d . . . . .
H16 H 0.7045 1.0033 0.2766 0.054 Uiso 1 1 calc R U . . .
C17 C 0.59559(16) 0.97449(18) 0.36453(14) 0.0469(5) Uani 1 1 d . . . . .
H17 H 0.6229 1.0378 0.4044 0.056 Uiso 1 1 calc R U . . .
C18 C 0.50474(15) 0.90304(16) 0.38485(13) 0.0387(4) Uani 1 1 d . . . . .
H18 H 0.4717 0.9187 0.4378 0.046 Uiso 1 1 calc R U . . .
C19 C 0.65335(15) 0.8298(2) 0.15191(13) 0.0466(5) Uani 1 1 d . . . . .
H19 H 0.7133 0.8764 0.1354 0.056 Uiso 1 1 calc R U . . .
C20 C 0.61415(18) 0.7348(2) 0.10077(14) 0.0544(6) Uani 1 1 d . . . . .
H20 H 0.6474 0.7129 0.0491 0.065 Uiso 1 1 calc R U . . .
C21 C 0.52273(18) 0.6682(2) 0.12527(14) 0.0517(5) Uani 1 1 d . . . . .
H21 H 0.4952 0.6023 0.0883 0.062 Uiso 1 1 calc R U . . .
 
loop_
 _atom_site_aniso_label
 _atom_site_aniso_U_11
 _atom_site_aniso_U_22
 _atom_site_aniso_U_33
 _atom_site_aniso_U_23
 _atom_site_aniso_U_13
 _atom_site_aniso_U_12
Si1 0.0298(3) 0.0420(3) 0.0529(3) 0.0251(2) 0.0026(2) 0.00023(19)
C1 0.0243(7) 0.0257(7) 0.0232(7) -0.0013(5) 0.0071(5) 0.0018(5)
N1 0.0374(8) 0.0469(9) 0.0363(8) 0.0045(6) 0.0176(6) 0.0003(6)
O1 0.0451(7) 0.0433(7) 0.0359(6) -0.0123(5) 0.0156(5) -0.0162(5)
N2 0.0252(6) 0.0273(6) 0.0310(7) 0.0000(5) 0.0098(5) -0.0034(5)
C2 0.0291(8) 0.0345(8) 0.0317(8) 0.0067(6) 0.0014(6) -0.0040(6)
C5 0.0330(8) 0.0384(9) 0.0324(8) 0.0034(7) 0.0021(6) 0.0099(7)
C4 0.0495(10) 0.0348(9) 0.0349(9) 0.0106(7) 0.0057(7) 0.0044(7)
C3 0.0414(9) 0.0367(9) 0.0415(9) 0.0113(7) 0.0057(7) -0.0080(7)
C6 0.0244(7) 0.0325(8) 0.0296(7) -0.0010(6) 0.0064(6) 0.0034(6)
C8 0.0257(7) 0.0286(8) 0.0344(8) 0.0064(6) 0.0037(6) -0.0026(6)
C7 0.0226(7) 0.0247(7) 0.0254(7) -0.0007(5) 0.0092(5) 0.0002(5)
C9 0.0342(11) 0.0714(15) 0.102(2) 0.0458(14) 0.0020(11) 0.0070(10)
C10 0.0469(12) 0.0342(10) 0.124(2) 0.0275(12) 0.0068(13) 0.0031(9)
C11 0.0750(16) 0.0926(19) 0.0462(12) 0.0315(12) 0.0074(11) -0.0089(14)
C12 0.0242(7) 0.0267(7) 0.0284(8) 0.0012(6) 0.0077(6) -0.0002(6)
C13 0.0221(7) 0.0307(8) 0.0371(8) 0.0087(6) 0.0075(6) 0.0000(6)
C14 0.0236(7) 0.0351(8) 0.0345(8) 0.0120(6) 0.0068(6) 0.0026(6)
C15 0.0228(7) 0.0488(10) 0.0425(9) 0.0230(8) 0.0077(7) 0.0042(7)
C16 0.0293(8) 0.0474(10) 0.0585(11) 0.0187(9) 0.0048(8) -0.0109(8)
C17 0.0398(10) 0.0429(10) 0.0576(12) 0.0033(9) 0.0064(8) -0.0146(8)
C18 0.0351(9) 0.0371(9) 0.0447(10) 0.0009(7) 0.0091(7) -0.0076(7)
C19 0.0281(8) 0.0682(13) 0.0456(10) 0.0249(10) 0.0123(7) 0.0022(8)
C20 0.0443(11) 0.0814(15) 0.0437(11) 0.0155(10) 0.0265(9) 0.0090(10)
C21 0.0551(12) 0.0624(13) 0.0436(10) -0.0012(9) 0.0269(9) -0.0009(10)
 
_geom_special_details
;
 All esds (except the esd in the dihedral angle between two l.s. planes)
 are estimated using the full covariance matrix.  The cell esds are taken
 into account individually in the estimation of esds in distances, angles
 and torsion angles; correlations between esds in cell parameters are only
 used when they are defined by crystal symmetry.  An approximate (isotropic)
 treatment of cell esds is used for estimating esds involving l.s. planes.
;
 
loop_
 _geom_bond_atom_site_label_1
 _geom_bond_atom_site_label_2
 _geom_bond_distance
 _geom_bond_site_symmetry_2
 _geom_bond_publ_flag
Si1 C11 1.862(3) . ?
Si1 C10 1.862(2) . ?
Si1 C9 1.865(2) . ?
Si1 C8 1.8768(16) . ?
C1 C6 1.396(2) . ?
C1 C2 1.397(2) . ?
C1 C7 1.488(2) . ?
N1 C21 1.318(2) . ?
N1 C14 1.356(2) . ?
O1 C12 1.2175(19) . ?
N2 C12 1.3575(19) . ?
N2 C13 1.4042(19) . ?
N2 H2A 0.8800 . ?
C2 C3 1.387(2) . ?
C2 H2 0.9500 . ?
C5 C6 1.385(2) . ?
C5 C4 1.385(3) . ?
C5 H5 0.9500 . ?
C4 C3 1.382(3) . ?
C4 H4 0.9500 . ?
C3 H3 0.9500 . ?
C6 H6 0.9500 . ?
C8 C7 1.338(2) . ?
C8 H8 0.9500 . ?
C7 C12 1.512(2) . ?
C9 H9A 0.9800 . ?
C9 H9B 0.9800 . ?
C9 H9C 0.9800 . ?
C10 H10A 0.9800 . ?
C10 H10B 0.9800 . ?
C10 H10C 0.9800 . ?
C11 H11A 0.9800 . ?
C11 H11B 0.9800 . ?
C11 H11C 0.9800 . ?
C13 C18 1.372(2) . ?
C13 C14 1.425(2) . ?
C14 C15 1.421(2) . ?
C15 C19 1.404(3) . ?
C15 C16 1.412(3) . ?
C16 C17 1.359(3) . ?
C16 H16 0.9500 . ?
C17 C18 1.420(2) . ?
C17 H17 0.9500 . ?
C18 H18 0.9500 . ?
C19 C20 1.351(3) . ?
C19 H19 0.9500 . ?
C20 C21 1.418(3) . ?
C20 H20 0.9500 . ?
C21 H21 0.9500 . ?
 
loop_
 _geom_angle_atom_site_label_1
 _geom_angle_atom_site_label_2
 _geom_angle_atom_site_label_3
 _geom_angle
 _geom_angle_site_symmetry_1
 _geom_angle_site_symmetry_3
 _geom_angle_publ_flag
C11 Si1 C10 110.08(13) . . ?
C11 Si1 C9 111.44(13) . . ?
C10 Si1 C9 107.88(12) . . ?
C11 Si1 C8 108.51(10) . . ?
C10 Si1 C8 114.14(10) . . ?
C9 Si1 C8 104.72(9) . . ?
C6 C1 C2 118.03(14) . . ?
C6 C1 C7 120.60(13) . . ?
C2 C1 C7 121.36(13) . . ?
C21 N1 C14 117.34(16) . . ?
C12 N2 C13 129.09(14) . . ?
C12 N2 H2A 115.5 . . ?
C13 N2 H2A 115.5 . . ?
C3 C2 C1 120.67(15) . . ?
C3 C2 H2 119.7 . . ?
C1 C2 H2 119.7 . . ?
C6 C5 C4 120.12(15) . . ?
C6 C5 H5 119.9 . . ?
C4 C5 H5 119.9 . . ?
C3 C4 C5 119.51(15) . . ?
C3 C4 H4 120.2 . . ?
C5 C4 H4 120.2 . . ?
C4 C3 C2 120.55(16) . . ?
C4 C3 H3 119.7 . . ?
C2 C3 H3 119.7 . . ?
C5 C6 C1 121.11(14) . . ?
C5 C6 H6 119.4 . . ?
C1 C6 H6 119.4 . . ?
C7 C8 Si1 131.38(12) . . ?
C7 C8 H8 114.3 . . ?
Si1 C8 H8 114.3 . . ?
C8 C7 C1 125.41(13) . . ?
C8 C7 C12 119.35(13) . . ?
C1 C7 C12 115.24(12) . . ?
Si1 C9 H9A 109.5 . . ?
Si1 C9 H9B 109.5 . . ?
H9A C9 H9B 109.5 . . ?
Si1 C9 H9C 109.5 . . ?
H9A C9 H9C 109.5 . . ?
H9B C9 H9C 109.5 . . ?
Si1 C10 H10A 109.5 . . ?
Si1 C10 H10B 109.5 . . ?
H10A C10 H10B 109.5 . . ?
Si1 C10 H10C 109.5 . . ?
H10A C10 H10C 109.5 . . ?
H10B C10 H10C 109.5 . . ?
Si1 C11 H11A 109.5 . . ?
Si1 C11 H11B 109.5 . . ?
H11A C11 H11B 109.5 . . ?
Si1 C11 H11C 109.5 . . ?
H11A C11 H11C 109.5 . . ?
H11B C11 H11C 109.5 . . ?
O1 C12 N2 124.48(14) . . ?
O1 C12 C7 122.73(13) . . ?
N2 C12 C7 112.78(12) . . ?
C18 C13 N2 125.66(15) . . ?
C18 C13 C14 120.02(14) . . ?
N2 C13 C14 114.32(14) . . ?
N1 C14 C15 123.40(16) . . ?
N1 C14 C13 117.22(14) . . ?
C15 C14 C13 119.36(16) . . ?
C19 C15 C16 124.03(16) . . ?
C19 C15 C14 116.72(18) . . ?
C16 C15 C14 119.23(16) . . ?
C17 C16 C15 120.28(16) . . ?
C17 C16 H16 119.9 . . ?
C15 C16 H16 119.9 . . ?
C16 C17 C18 121.26(18) . . ?
C16 C17 H17 119.4 . . ?
C18 C17 H17 119.4 . . ?
C13 C18 C17 119.85(17) . . ?
C13 C18 H18 120.1 . . ?
C17 C18 H18 120.1 . . ?
C20 C19 C15 120.05(17) . . ?
C20 C19 H19 120.0 . . ?
C15 C19 H19 120.0 . . ?
C19 C20 C21 119.08(18) . . ?
C19 C20 H20 120.5 . . ?
C21 C20 H20 120.5 . . ?
N1 C21 C20 123.4(2) . . ?
N1 C21 H21 118.3 . . ?
C20 C21 H21 118.3 . . ?
 
loop_
 _geom_torsion_atom_site_label_1
 _geom_torsion_atom_site_label_2
 _geom_torsion_atom_site_label_3
 _geom_torsion_atom_site_label_4
 _geom_torsion
 _geom_torsion_site_symmetry_1
 _geom_torsion_site_symmetry_2
 _geom_torsion_site_symmetry_3
 _geom_torsion_site_symmetry_4
 _geom_torsion_publ_flag
C6 C1 C2 C3 0.3(2) . . . . ?
C7 C1 C2 C3 -178.61(15) . . . . ?
C6 C5 C4 C3 0.1(3) . . . . ?
C5 C4 C3 C2 0.0(3) . . . . ?
C1 C2 C3 C4 -0.2(3) . . . . ?
C4 C5 C6 C1 -0.1(2) . . . . ?
C2 C1 C6 C5 -0.1(2) . . . . ?
C7 C1 C6 C5 178.78(13) . . . . ?
C11 Si1 C8 C7 104.70(18) . . . . ?
C10 Si1 C8 C7 -18.5(2) . . . . ?
C9 Si1 C8 C7 -136.20(18) . . . . ?
Si1 C8 C7 C1 175.18(11) . . . . ?
Si1 C8 C7 C12 -3.5(2) . . . . ?
C6 C1 C7 C8 164.84(15) . . . . ?
C2 C1 C7 C8 -16.3(2) . . . . ?
C6 C1 C7 C12 -16.40(19) . . . . ?
C2 C1 C7 C12 162.44(14) . . . . ?
C13 N2 C12 O1 -3.2(3) . . . . ?
C13 N2 C12 C7 177.32(14) . . . . ?
C8 C7 C12 O1 114.07(18) . . . . ?
C1 C7 C12 O1 -64.78(19) . . . . ?
C8 C7 C12 N2 -66.41(18) . . . . ?
C1 C7 C12 N2 114.75(14) . . . . ?
C12 N2 C13 C18 -2.2(3) . . . . ?
C12 N2 C13 C14 177.25(14) . . . . ?
C21 N1 C14 C15 0.7(3) . . . . ?
C21 N1 C14 C13 -177.66(16) . . . . ?
C18 C13 C14 N1 177.97(15) . . . . ?
N2 C13 C14 N1 -1.5(2) . . . . ?
C18 C13 C14 C15 -0.5(2) . . . . ?
N2 C13 C14 C15 -179.97(13) . . . . ?
N1 C14 C15 C19 0.0(2) . . . . ?
C13 C14 C15 C19 178.34(14) . . . . ?
N1 C14 C15 C16 -178.29(15) . . . . ?
C13 C14 C15 C16 0.1(2) . . . . ?
C19 C15 C16 C17 -177.72(18) . . . . ?
C14 C15 C16 C17 0.4(3) . . . . ?
C15 C16 C17 C18 -0.5(3) . . . . ?
N2 C13 C18 C17 179.83(16) . . . . ?
C14 C13 C18 C17 0.4(3) . . . . ?
C16 C17 C18 C13 0.1(3) . . . . ?
C16 C15 C19 C20 177.03(18) . . . . ?
C14 C15 C19 C20 -1.2(3) . . . . ?
C15 C19 C20 C21 1.6(3) . . . . ?
C14 N1 C21 C20 -0.3(3) . . . . ?
C19 C20 C21 N1 -0.8(3) . . . . ?
 
_refine_diff_density_max    0.353
_refine_diff_density_min   -0.457
_refine_diff_density_rms    0.093

_shelx_res_file
;

    t_a.res created by SHELXL-2014/7


TITL t_a.res in P2(1)/n
REM Old TITL t in P2(1)/n

REM SHELXT solution in P2(1)/n
REM R1 0.173,  Rweak 0.008,  Alpha 0.031,  Orientation as input
REM Formula found by SHELXT:  C21 N2 O Si

CELL  1.54178  11.9573  11.2275  14.8598   90.000   98.926   90.000
ZERR    4.000   0.0003   0.0003   0.0004    0.000    0.001    0.000
LATT  1
SYMM 1/2-X, 1/2+Y, 1/2-Z
SFAC C H N O SI
UNIT 84 88 8 4 4
TEMP -100.140
L.S. 10
acta
size 0.22 0.20 0.15
conf
omit 0 0 2
omit 1 1 0
BOND $H
LIST 6
FMAP 2
PLAN 20
WGHT    0.072300    0.982000
EXTI    0.030009
FVAR       1.19379
SI1   5    0.099320    0.773068    0.241958    11.00000    0.02975    0.04200 =
         0.05287    0.02509    0.00258    0.00023
C1    1    0.235590    0.536277    0.461215    11.00000    0.02433    0.02573 =
         0.02319   -0.00133    0.00709    0.00175
N1    3    0.473922    0.693132    0.196665    11.00000    0.03744    0.04695 =
         0.03633    0.00453    0.01762    0.00025
O1    4    0.330412    0.792796    0.476560    11.00000    0.04507    0.04328 =
         0.03595   -0.01227    0.01561   -0.01619
N2    3    0.376006    0.733928    0.339976    11.00000    0.02523    0.02733 =
         0.03098    0.00004    0.00979   -0.00338
AFIX  43
H2A   2    0.357928    0.680796    0.296622    11.00000   -1.20000
AFIX   0
C2    1    0.144813    0.462212    0.472251    11.00000    0.02905    0.03448 =
         0.03169    0.00672    0.00140   -0.00404
AFIX  43
H2    2    0.073178    0.474469    0.435763    11.00000   -1.20000
AFIX   0
C5    1    0.352795    0.423832    0.579142    11.00000    0.03305    0.03842 =
         0.03244    0.00338    0.00207    0.00986
AFIX  43
H5    2    0.424298    0.410758    0.615617    11.00000   -1.20000
AFIX   0
C4    1    0.261805    0.351430    0.589418    11.00000    0.04950    0.03480 =
         0.03490    0.01058    0.00566    0.00435
AFIX  43
H4    2    0.270578    0.288796    0.632927    11.00000   -1.20000
AFIX   0
C3    1    0.158215    0.370987    0.535925    11.00000    0.04142    0.03670 =
         0.04150    0.01128    0.00574   -0.00801
AFIX  43
H3    2    0.095643    0.321525    0.542823    11.00000   -1.20000
AFIX   0
C6    1    0.339703    0.515233    0.515792    11.00000    0.02438    0.03246 =
         0.02957   -0.00095    0.00639    0.00342
AFIX  43
H6    2    0.402610    0.564442    0.509358    11.00000   -1.20000
AFIX   0
C8    1    0.135758    0.649496    0.326480    11.00000    0.02574    0.02858 =
         0.03443    0.00637    0.00375   -0.00261
AFIX  43
H8    2    0.083750    0.584958    0.319593    11.00000   -1.20000
AFIX   0
C7    1    0.222011    0.636237    0.394702    11.00000    0.02264    0.02474 =
         0.02543   -0.00070    0.00924    0.00019
C9    1   -0.056035    0.795729    0.236915    11.00000    0.03420    0.07139 =
         0.10230    0.04576    0.00196    0.00703
AFIX 137
H9A   2   -0.083236    0.852619    0.188416    11.00000   -1.50000
H9B   2   -0.071194    0.826944    0.295420    11.00000   -1.50000
H9C   2   -0.095313    0.719534    0.224258    11.00000   -1.50000
AFIX   0
C10   1    0.171153    0.916908    0.276161    11.00000    0.04688    0.03423 =
         0.12430    0.02751    0.00675    0.00315
AFIX 137
H10A  2    0.248307    0.915252    0.261584    11.00000   -1.50000
H10B  2    0.174070    0.928784    0.341820    11.00000   -1.50000
H10C  2    0.128878    0.982376    0.243076    11.00000   -1.50000
AFIX   0
C11   1    0.134363    0.723795    0.129949    11.00000    0.07501    0.09261 =
         0.04619    0.03154    0.00737   -0.00893
AFIX 137
H11A  2    0.098250    0.646818    0.113501    11.00000   -1.50000
H11B  2    0.216617    0.715722    0.134148    11.00000   -1.50000
H11C  2    0.106662    0.782917    0.083259    11.00000   -1.50000
AFIX   0
C12   1    0.314189    0.729619    0.409202    11.00000    0.02416    0.02675 =
         0.02844    0.00120    0.00767   -0.00021
C13   1    0.464748    0.811263    0.327835    11.00000    0.02213    0.03067 =
         0.03707    0.00867    0.00745   -0.00003
C14   1    0.514814    0.787301    0.248733    11.00000    0.02363    0.03506 =
         0.03448    0.01199    0.00680    0.00264
C15   1    0.605531    0.859785    0.229412    11.00000    0.02281    0.04878 =
         0.04252    0.02296    0.00771    0.00418
C16   1    0.644231    0.954026    0.289143    11.00000    0.02925    0.04739 =
         0.05848    0.01875    0.00476   -0.01093
AFIX  43
H16   2    0.704510    1.003335    0.276592    11.00000   -1.20000
AFIX   0
C17   1    0.595594    0.974491    0.364529    11.00000    0.03980    0.04293 =
         0.05763    0.00329    0.00640   -0.01463
AFIX  43
H17   2    0.622904    1.037802    0.404376    11.00000   -1.20000
AFIX   0
C18   1    0.504740    0.903036    0.384854    11.00000    0.03512    0.03708 =
         0.04473    0.00088    0.00908   -0.00762
AFIX  43
H18   2    0.471731    0.918744    0.437809    11.00000   -1.20000
AFIX   0
C19   1    0.653350    0.829844    0.151907    11.00000    0.02809    0.06816 =
         0.04558    0.02489    0.01226    0.00223
AFIX  43
H19   2    0.713317    0.876440    0.135410    11.00000   -1.20000
AFIX   0
C20   1    0.614152    0.734819    0.100766    11.00000    0.04432    0.08135 =
         0.04371    0.01546    0.02646    0.00903
AFIX  43
H20   2    0.647384    0.712916    0.049099    11.00000   -1.20000
AFIX   0
C21   1    0.522733    0.668234    0.125272    11.00000    0.05515    0.06240 =
         0.04364   -0.00119    0.02689   -0.00091
AFIX  43
H21   2    0.495242    0.602251    0.088312    11.00000   -1.20000

AFIX   0
HKLF 4

REM  t_a.res in P2(1)/n
REM R1 =  0.0481 for    3376 Fo > 4sig(Fo)  and  0.0502 for all    3602 data
REM    230 parameters refined using      0 restraints

END

WGHT      0.0667      0.6733

REM Highest difference peak  0.353,  deepest hole -0.457,  1-sigma level  0.093
Q1    1   0.1056  0.8283  0.2850  11.00000  0.05    0.35
Q2    1   0.0415  0.4668  0.3899  11.00000  0.05    0.33
Q3    1   0.6493  0.7535  0.1284  11.00000  0.05    0.31
Q4    1  -0.0691  0.7780  0.2201  11.00000  0.05    0.29
Q5    1   0.1967  0.6372  0.3522  11.00000  0.05    0.28
Q6    1   0.2628  0.6818  0.3997  11.00000  0.05    0.26
Q7    1   0.0766  0.4732  0.2649  11.00000  0.05    0.26
Q8    1   0.1056  0.5104  0.2009  11.00000  0.05    0.25
Q9    1   0.1682  0.6661  0.3780  11.00000  0.05    0.25
Q10   1  -0.1019  0.7698  0.1569  11.00000  0.05    0.23
Q11   1   0.1332  0.7110  0.3017  11.00000  0.05    0.22
Q12   1   0.1226  0.4965  0.1483  11.00000  0.05    0.22
Q13   1   0.4531  0.3392  0.6305  11.00000  0.05    0.22
Q14   1   0.4273  0.6099  0.5323  11.00000  0.05    0.21
Q15   1   0.4979  0.3149  0.5360  11.00000  0.05    0.21
Q16   1  -0.0184  0.4484  0.4662  11.00000  0.05    0.21
Q17   1   0.4414  0.3029  0.6657  11.00000  0.05    0.21
Q18   1  -0.0367  0.4014  0.4816  11.00000  0.05    0.20
Q19   1   0.2857  0.5368  0.5010  11.00000  0.05    0.20
Q20   1   0.0091  0.7667 -0.0171  11.00000  0.05    0.20
;
_shelx_res_checksum   96660

_shelx_hkl_file
;
   1   0   0    2.60    0.30
   2   0   0   53.29    1.70
  -2   0   0   56.19    1.80
  -2   0   0   59.69    1.50
  -3   0   0   -0.10    0.40
   3   0   0    0.00    0.30
  -5   0   0    0.40    1.10
   5   0   0    0.20    0.60
   6   0   0 2200.38   50.59
   7   0   0    2.10    2.30
   7   0   0    3.90    1.60
  -7   0   0    2.70    1.70
  -8   0   0 3268.57   75.89
   8   0   0 3375.26   75.79
  -8   0   0 3395.06   75.99
  -8   0   0 3309.87   76.69
  -9   0   0    0.40    1.80
  -9   0   0    0.70    2.80
  -9   0   0   -1.90    2.20
   9   0   0    1.10    2.50
  10   0   0   21.10    3.50
 -10   0   0   18.40    2.80
 -10   0   0   12.10    2.20
 -10   0   0   13.70    3.10
 -11   0   0   -1.50    2.20
 -11   0   0    0.70    2.00
 -11   0   0    2.20    2.50
 -12   0   0  144.09    5.90
 -12   0   0  142.99    5.40
 -12   0   0  143.59    6.50
 -13   0   0   -1.50    1.70
 -13   0   0   -0.80    1.90
 -13   0   0   -2.00    1.20
 -14   0   0   60.79    2.60
  -1  -1   0  608.84   19.60
   1   1   0  741.83   20.40
   2   1   0 2724.53   69.59
  -3  -1   0  771.22   17.70
   3  -1   0  763.42   17.50
  -3  -1   0  750.42   17.80
  -3   1   0  766.62   17.60
   3   1   0  747.23   17.60
   3   1   0  761.22   28.70
   3   1   0  771.22   17.70
   4  -1   0   67.39    2.40
  -4  -1   0   69.29    2.90
  -4  -1   0   70.49    2.60
   4   1   0   75.09    2.70
   4   1   0   69.39    9.80
  -4   1   0   70.19    2.70
   5  -1   0   54.29    2.40
  -5  -1   0   56.09    2.50
  -5  -1   0   51.39    3.30
   5   1   0   49.10   13.00
   5   1   0   52.39    2.50
  -5   1   0   55.49    3.00
  -6  -1   0 3005.10   68.79
   6  -1   0 3117.59   69.49
  -6   1   0 3070.69   69.39
   6   1   0 3067.39   69.79
   7  -1   0   63.99    7.20
  -7  -1   0   63.29    3.80
   7  -1   0   61.89    3.70
  -7   1   0   67.89    3.70
   7   1   0   67.69    4.10
  -8  -1   0 2551.64   59.39
  -8  -1   0 2604.44   59.39
  -8  -1   0 2556.54   60.29
   8   1   0 2586.04   59.29
  -8   1   0 2668.53   59.49
  -8   1   0 2535.35   59.99
  -9  -1   0  446.16   12.70
  -9  -1   0  455.65   13.70
  -9  -1   0  465.65   12.80
  -9   1   0  449.95   13.50
   9   1   0  449.56   12.70
  -9   1   0  432.66   12.70
  -9   1   0  452.35   12.70
 -10  -1   0  565.04   16.20
 -10  -1   0  575.14   15.70
 -10  -1   0  584.74   15.70
  10   1   0  562.44   15.60
 -10   1   0  585.54   15.80
 -10   1   0  566.34   16.20
 -10   1   0  590.24   15.70
 -11  -1   0  123.69    6.40
 -11  -1   0  137.69    5.90
 -11   1   0  122.19    7.20
 -11   1   0  124.89    6.30
 -11   1   0  115.29    5.70
 -12  -1   0   61.89    4.10
 -12  -1   0   63.19    5.60
 -12  -1   0   62.09    3.70
 -12   1   0   58.79    3.60
 -12   1   0   54.29    5.10
  12   1   0   49.99    4.80
 -12   1   0   54.69    4.00
 -13  -1   0   91.79    3.80
 -13  -1   0   94.59    4.50
 -13  -1   0   92.49    4.10
 -13   1   0   92.79    4.10
 -13   1   0   86.89    3.70
 -13   1   0   94.79    4.10
 -14  -1   0  453.15   11.40
 -14   1   0  470.05   11.50
   1  -2   0   13.00    2.50
  -1  -2   0   12.70    1.10
  -1  -2   0   12.50    0.80
   1  -2   0   11.60    0.90
  -1   2   0   12.00    0.80
   1   2   0   12.90    0.70
   1   2   0   12.30    2.70
   1   2   0   10.60    0.90
  -2  -2   0 3724.63   95.69
   2   2   0 3870.91   95.79
   3  -2   0  489.45   11.30
  -3  -2   0  454.95   12.30
  -3  -2   0  494.85   11.80
   3   2   0  463.05   11.80
  -3   2   0  483.65   11.30
   3   2   0  494.25   11.70
  -4  -2   0  519.85   12.80
   4  -2   0  486.05   12.10
  -4  -2   0  508.65   12.90
   4   2   0  506.55   12.70
  -4   2   0  524.15   12.30
  -5  -2   0  199.18    6.40
   5  -2   0  205.48    5.70
   5   2   0  202.28    6.20
  -5   2   0  202.98    6.10
  -6  -2   0   77.29    4.30
  -6  -2   0   80.19    4.30
   6   2   0   80.09    3.80
  -6   2   0   75.09    3.80
  -6   2   0   71.99    4.60
   7  -2   0  375.76   10.80
  -7  -2   0  396.26   10.90
   7   2   0  374.96   11.40
  -7   2   0  389.06   10.70
  -8  -2   0   73.79    5.50
  -8  -2   0   74.49    6.70
  -8  -2   0   76.89    4.50
   8   2   0   72.49    4.30
  -8   2   0   77.69    4.90
  -8   2   0   79.29    4.20
  -8   2   0   72.39    5.90
  -9  -2   0   28.70    4.20
  -9  -2   0   33.00    3.90
  -9  -2   0   33.50    5.30
  -9   2   0   33.70    3.90
  -9   2   0   34.80    5.00
   9   2   0   32.70    3.70
  -9   2   0   38.20    3.50
 -10  -2   0  988.10   24.40
 -10  -2   0  983.50   24.30
 -10  -2   0  950.10   25.00
 -10   2   0  963.20   24.50
  10   2   0  967.80   24.40
 -10   2   0  970.40   24.80
 -11  -2   0  126.69    6.40
 -11  -2   0  135.59    5.90
 -11  -2   0  127.69    5.40
 -11   2   0  129.29    5.30
 -11   2   0  137.79    6.40
  11   2   0  127.79    5.50
 -11   2   0  132.19    5.80
 -12  -2   0  129.69    5.60
 -12  -2   0  131.39    5.40
 -12  -2   0  135.39    5.70
 -12   2   0  131.99    6.60
 -12   2   0  131.79    5.10
 -12   2   0  136.09    5.70
  12   2   0  129.59    5.40
 -13  -2   0  111.59    4.50
 -13  -2   0  110.09    4.10
 -13   2   0  108.29    4.10
 -13   2   0  112.39    4.30
 -13   2   0  104.49    4.30
 -14  -2   0  427.76   10.60
 -14   2   0  422.16   10.60
   0  -3   0    0.00    1.00
   0  -3   0   -0.20    0.60
   0   3   0    0.20    0.30
   0   3   0    0.80    1.60
   0   3   0   -0.30    0.30
   1  -3   0  146.69    9.10
  -1  -3   0  137.69    9.70
   1  -3   0  146.09    4.30
  -1  -3   0  143.19    4.50
   1   3   0  145.59    3.80
   1   3   0  140.09    9.10
  -1   3   0  139.79    4.10
   1   3   0  133.79    4.30
   2  -3   0 1483.45   44.40
   2  -3   0 1501.55   33.50
  -2  -3   0 1518.65   34.20
  -2  -3   0 1460.35   33.50
  -2   3   0 1442.96   33.40
   2   3   0 1467.55   33.40
   2   3   0 1493.55   43.30
  -2   3   0 1459.65   32.90
   2   3   0 1426.56   33.90
   3  -3   0 2949.51   80.29
  -3  -3   0 3063.99   82.19
  -3  -3   0 2880.41   65.59
  -3  -3   0 2943.11   66.09
   3  -3   0 2884.31   64.89
   3   3   0 2812.82   65.89
   3   3   0 3044.90   81.09
   3   3   0 2810.22   65.49
  -3   3   0 2827.42   64.79
   4  -3   0 2276.07   68.29
  -4  -3   0 2270.97   51.29
  -4  -3   0 2252.27   50.89
   4   3   0 2256.07   50.69
   4   3   0 2219.68   51.09
  -4   3   0 2067.69   50.79
  -5  -3   0  826.82   20.50
  -5  -3   0  758.72   19.70
  -5   3   0  793.72   19.60
   5   3   0  828.62   19.90
  -5   3   0  812.72   19.30
   6  -3   0 1148.09   26.20
  -6  -3   0 1058.99   27.90
  -6  -3   0 1085.09   26.50
  -6  -3   0 1127.09   26.70
  -6   3   0 1086.09   27.40
  -6   3   0 1128.49   26.60
   6   3   0 1141.89   27.30
  -7  -3   0  969.60   23.70
  -7  -3   0  994.10   24.00
  -7   3   0  959.10   23.80
  -8  -3   0  633.94   18.00
  -8  -3   0  646.04   17.00
  -8  -3   0  621.64   16.70
  -8   3   0  656.33   16.80
  -8   3   0  648.94   16.80
  -8   3   0  637.24   17.50
  -9  -3   0  383.36   11.60
  -9  -3   0  396.46   11.60
  -9  -3   0  391.26   12.60
   9   3   0  390.76   11.60
  -9   3   0  401.56   13.00
 -10  -3   0    4.00    2.90
 -10  -3   0    6.70    2.60
 -10  -3   0    9.30    2.50
 -10   3   0    7.20    2.60
 -10   3   0    7.20    2.20
  10   3   0   10.30    2.40
 -10   3   0    5.30    1.80
 -11  -3   0    8.90    2.70
 -11  -3   0    7.60    2.40
 -11  -3   0    7.30    2.20
 -11   3   0   14.90    2.50
 -11   3   0   10.60    2.60
 -11   3   0   10.50    2.30
 -12  -3   0  231.28    7.00
 -12  -3   0  227.28    7.50
  12   3   0  228.08    7.40
 -12   3   0  223.68    7.80
 -12   3   0  223.98    7.30
 -12   3   0  225.48    7.30
 -13  -3   0   37.20    2.50
 -13  -3   0   35.90    3.10
  13   3   0   34.20    3.70
 -13   3   0   34.60    2.30
 -13   3   0   36.60    2.70
   0  -4   0 3922.01   87.99
   0  -4   0 4075.89  100.09
   0   4   0 3787.32   86.69
   0   4   0 3774.12   87.69
   0   4   0 3976.30  101.59
   1  -4   0   46.80    6.00
   1  -4   0   49.50    2.70
  -1  -4   0   48.70    2.90
  -1  -4   0   46.00    6.80
  -1   4   0   46.30    1.50
  -1   4   0   45.20    2.20
   1   4   0   47.00    1.80
   1   4   0   53.39    2.50
  -1   4   0   50.09    7.90
   1   4   0   46.40    7.20
   2  -4   0  195.48   13.10
  -2  -4   0  189.18    6.50
   2  -4   0  199.48    6.00
  -2   4   0  196.18    5.60
   2   4   0  195.68    5.50
  -2   4   0  201.88    4.90
   2   4   0  195.28    6.10
   2   4   0  196.68   13.60
   3  -4   0  209.88    5.90
  -3  -4   0  168.08   15.00
   3  -4   0  206.38   14.80
  -3  -4   0  190.08    7.00
   3   4   0  191.58   15.00
   3   4   0  196.58    6.40
  -3   4   0  196.38    5.00
   3   4   0  203.48    5.80
   4  -4   0 4354.96  118.29
   4  -4   0 4350.26   95.09
  -4   4   0 4130.89   94.89
   4   4   0 4268.47   96.09
   4   4   0 4295.97  117.39
  -4   4   0 4264.97   95.79
   4   4   0 4222.48   96.79
  -5  -4   0  879.61   21.40
   5  -4   0  883.71   40.40
  -5   4   0  849.52   21.20
  -5   4   0  842.02   21.90
   5   4   0  900.11   21.70
   6  -4   0  193.48   20.80
  -6  -4   0  214.38    7.30
  -6  -4   0  217.78    7.20
  -6   4   0  224.08    7.00
   6   4   0  213.18    7.60
  -7  -4   0  723.03   18.10
  -7  -4   0  725.83   18.30
  -7   4   0  713.83   18.20
  -7   4   0  707.63   18.20
   7   4   0  667.43   18.70
  -7   4   0  712.33   18.80
  -8  -4   0    9.90    3.20
  -8  -4   0   10.10    2.70
  -8  -4   0    6.20    3.30
  -8   4   0   10.10    2.50
   8   4   0   14.10    3.70
  -8   4   0   17.20    3.00
  -8   4   0   12.10    2.10
  -9  -4   0  270.37   10.10
  -9  -4   0  270.07    9.00
  -9  -4   0  264.47    9.20
   9   4   0  269.97    9.00
  -9   4   0  267.87    9.30
  -9   4   0  265.47    8.80
  -9   4   0  266.57    8.90
 -10  -4   0  248.98    8.50
 -10  -4   0  230.48    8.70
 -10  -4   0  249.38    9.40
 -10   4   0  240.48    8.10
 -10   4   0  237.38    8.60
 -10   4   0  242.88    8.40
  10   4   0  250.07    8.70
 -11  -4   0   16.50    2.80
 -11  -4   0   13.20    3.00
 -11   4   0   15.40    2.70
  11   4   0   12.90    2.00
 -11   4   0   13.60    2.40
 -11   4   0   16.30    2.50
 -12  -4   0    3.80    1.70
 -12  -4   0    3.10    1.90
  12   4   0    4.00    1.70
 -12   4   0    5.40    1.60
 -12   4   0    4.80    1.30
 -13  -4   0  283.47    8.10
 -13   4   0  288.47    7.60
  13   4   0  274.47    8.00
 -13   4   0  271.27    7.60
   0  -5   0    1.40    2.30
   0  -5   0    1.10    1.60
   0   5   0    0.10    0.50
   0   5   0    0.30    4.70
   0   5   0    1.10    0.80
  -1  -5   0  621.64   30.60
  -1  -5   0  650.93   18.00
   1  -5   0  701.33   17.70
   1  -5   0  719.03   29.20
   1   5   0  702.93   16.30
  -1   5   0  692.23   17.20
  -1   5   0  692.93   15.80
   1   5   0  684.13   30.90
   1   5   0  684.43   17.70
   2  -5   0   26.10    3.30
   2  -5   0   27.30    6.50
   2   5   0   24.40    1.70
  -2   5   0   27.10    1.20
   2   5   0   24.40    2.30
  -2   5   0   27.90    2.00
  -3  -5   0  498.25   13.80
   3  -5   0  548.05   14.30
   3  -5   0  555.04   27.90
  -3   5   0  523.95   13.80
   3   5   0  536.15   14.70
  -3   5   0  547.65   12.50
   3   5   0  558.94   13.70
   4  -5   0  886.21   39.80
  -4  -5   0  850.81   21.40
  -4  -5   0  927.61   42.60
   4   5   0  889.11   21.70
  -4   5   0  831.72   21.50
  -4   5   0  885.01   21.40
  -5  -5   0  282.57    8.60
   5  -5   0  263.07   22.70
  -5  -5   0  270.97    8.40
  -5   5   0  266.17    8.90
   5   5   0  255.27    8.60
  -5   5   0  284.87    8.30
  -6  -5   0   71.89    5.30
  -6  -5   0   81.99    5.10
  -6   5   0   78.99    5.60
   6   5   0   70.19    5.40
  -6   5   0   76.29    4.10
  -7  -5   0  109.69    5.20
  -7   5   0  101.09    5.50
  -7   5   0   97.49    4.80
  -7   5   0  101.79    5.80
   7   5   0   94.09    6.00
  -8  -5   0  157.48    6.90
  -8  -5   0  159.98    6.50
  -8  -5   0  135.29    9.20
  -8   5   0  161.98    6.50
   8   5   0  152.08    7.10
  -8   5   0  161.78    6.30
  -9  -5   0  424.06   12.90
  -9  -5   0  431.46   13.50
  -9   5   0  432.66   12.60
  -9   5   0  454.95   12.40
  -9   5   0  431.76   12.80
   9   5   0  429.06   12.70
   9   5   0  416.16   12.80
 -10  -5   0   45.30    5.30
 -10  -5   0   44.80    5.00
 -10   5   0   48.10    4.30
  10   5   0   38.10    3.30
 -10   5   0   45.30    3.20
 -10   5   0   45.60    3.90
 -11  -5   0   88.49    5.00
 -11  -5   0   91.99    4.60
 -11   5   0   87.69    5.40
  11   5   0   89.19    4.30
 -12  -5   0  125.29    4.90
  12   5   0  129.79    4.90
 -12   5   0  126.39    4.60
 -12   5   0  126.79    4.40
  13  -5   0   29.00    2.30
  13   5   0   26.50    2.90
   0  -6   0   21.60    2.80
   0  -6   0   23.10    7.10
   0   6   0   22.60    1.60
   0   6   0   23.60    2.70
   0   6   0   23.70    3.20
   1  -6   0    4.50    4.00
   1  -6   0    4.90    1.40
  -1  -6   0    3.10    1.80
   1   6   0    5.40    2.00
  -1   6   0    6.90    1.20
  -1   6   0    4.90    0.80
   1   6   0    6.50    1.00
   1   6   0    3.70    1.30
  -1   6   0    5.80    1.30
  -1   6   0    5.20    1.90
   2  -6   0   10.20    1.60
  -2  -6   0    9.60    2.00
   2  -6   0    6.50    4.40
   2   6   0    8.80    1.60
   2   6   0    6.70    2.10
  -2   6   0    8.00    2.10
  -3  -6   0  464.25   12.10
   3  -6   0  426.76   11.40
   3  -6   0  452.15   27.60
   3   6   0  418.96   12.30
   3   6   0  462.05   12.10
  -3   6   0  443.96   12.20
   4  -6   0 1098.69   49.99
  -4  -6   0 1088.79   26.90
  -4  -6   0 1120.79   27.00
  -4  -6   0 1202.68   55.29
   4   6   0 1100.39   27.50
   4   6   0 1087.29   27.30
  -4   6   0 1155.28   27.20
  -5  -6   0  130.69    6.00
  -5   6   0  125.79    6.30
  -5   6   0  120.09    5.90
   5   6   0  114.89    5.80
  -6  -6   0    1.70    1.90
  -6   6   0    1.90    1.50
   6   6   0    0.90    2.20
  -6   6   0   -1.90    3.50
  -6   6   0    1.30    2.30
  -6   6   0    3.20    3.30
  -7  -6   0  347.57   10.70
  -7   6   0  358.86   10.70
   7   6   0  337.57   10.70
  -7   6   0  353.46   11.10
  -7   6   0  353.46   10.50
  -8  -6   0   27.60    5.10
  -8  -6   0   31.20    4.10
  -8   6   0   31.90    4.10
  -8   6   0   28.80    3.30
   8   6   0   29.90    4.50
  -8   6   0   28.00    3.30
   8   6   0   24.40    3.70
  -9  -6   0  297.47   10.60
   9   6   0  290.77    9.70
  -9   6   0  286.07    9.10
   9   6   0  299.07    9.80
  -9   6   0  288.57    9.60
 -10  -6   0  446.66   13.40
  10   6   0  441.96   12.80
  10   6   0  424.36   12.40
 -10   6   0  437.36   12.10
 -10   6   0  450.25   12.70
 -11  -6   0  141.29    5.70
  11   6   0  152.08    5.50
 -11   6   0  145.89    5.30
 -12  -6   0   17.40    2.00
 -12   6   0   15.40    2.20
  12   6   0   14.90    2.50
   0  -7   0   -1.50    6.90
   0  -7   0    0.70    1.50
   0   7   0    1.70    1.90
   1  -7   0 1355.66   55.09
   1  -7   0 1353.16   31.90
  -1  -7   0 1394.36   32.20
  -1   7   0 1382.16   32.70
   1   7   0 1361.86   32.60
   2  -7   0  139.89    4.90
  -2  -7   0  146.49    5.50
   2  -7   0  138.09   17.70
  -2   7   0  114.89    6.40
   2   7   0  129.39    5.80
   2   7   0  130.29    5.70
  -2   7   0  140.59    5.70
   3  -7   0 1357.06   35.50
  -3  -7   0 1532.95   35.00
   3   7   0 1516.75   35.30
  -3   7   0 1516.95   35.50
   3   7   0 1491.35   35.40
  -3   7   0 1456.85   35.90
   4  -7   0  262.97    7.80
  -4  -7   0  269.27    8.50
  -4   7   0  273.97    8.70
  -4   7   0  257.67    9.00
   4   7   0  252.87    8.60
   4   7   0  258.17    9.10
   5  -7   0 1500.35   35.40
  -5  -7   0 1472.45   36.10
  -5   7   0 1497.45   36.20
   5   7   0 1529.05   36.20
  -5   7   0 1560.74   36.50
  -6  -7   0   72.69    4.80
   6  -7   0   68.69    3.80
  -6   7   0   74.89    6.30
  -6   7   0   78.09    6.00
  -7  -7   0  201.78    7.70
   7  -7   0  195.58    6.70
  -7   7   0  204.18    7.70
   7   7   0  194.18    7.50
   8  -7   0   10.30    2.00
  -8  -7   0   12.50    2.70
   8   7   0    5.50    2.20
  -8   7   0   11.50    2.50
   8   7   0    9.10    2.30
   9  -7   0  253.87    7.70
  -9  -7   0  258.07    9.50
   9   7   0  257.67    8.70
  -9   7   0  250.07    8.60
   9   7   0  252.67    8.30
  10  -7   0    2.40    1.20
 -10  -7   0    1.90    1.90
  10   7   0    3.00    1.50
 -10   7   0    6.40    1.60
  10   7   0    6.90    1.90
 -11  -7   0    7.80    1.80
  11  -7   0    8.40    1.30
  11   7   0    7.30    1.50
  12  -7   0   86.39    3.20
 -12  -7   0   81.19    5.70
 -12   7   0   75.19    3.30
  12   7   0   82.89    3.50
   0  -8   0    5.00    1.70
   0   8   0    8.50    2.70
   0   8   0   15.80    3.40
  -1  -8   0 1301.97   31.10
   1  -8   0 1340.47   30.90
  -1   8   0 1318.77   31.70
   1   8   0 1324.37   31.60
   1   8   0 1235.98   31.30
  -1   8   0 1294.37   31.60
   2  -8   0  440.06   11.70
  -2  -8   0  446.06   12.20
  -2   8   0  445.76   12.80
  -2   8   0  429.86   12.50
   2   8   0  416.06   12.30
   2   8   0  425.36   12.50
  -3  -8   0  385.46   11.10
   3  -8   0  378.26   10.50
  -3   8   0  373.66   11.40
   3   8   0  382.06   11.60
   3   8   0  380.46   11.30
  -3   8   0  381.26   11.70
   4  -8   0  509.55   13.40
  -4   8   0  517.95   14.30
   4   8   0  486.45   14.00
   4   8   0  500.05   14.40
  -5  -8   0  392.06   11.80
   5  -8   0  386.46   10.90
   5   8   0  395.66   11.70
  -5   8   0  387.66   12.00
  -5   8   0  396.56   12.10
   6  -8   0  383.06   11.00
  -6  -8   0  404.16   12.00
  -6   8   0  405.16   12.40
   6   8   0  380.86   11.80
  -6   8   0  397.36   12.10
   7  -8   0  617.04   15.70
  -7  -8   0  591.84   16.40
  -7   8   0  586.24   16.30
   7   8   0  598.54   16.20
   7   8   0  585.24   16.20
  -8  -8   0   46.00    5.10
   8  -8   0   45.80    2.90
  -8  -8   0   42.80    3.60
   8   8   0   47.30    4.10
   8   8   0   49.40    3.40
  -9  -8   0   94.19    4.90
   9  -8   0   93.99    3.90
   9   8   0   92.09    4.30
   9   8   0   89.99    4.40
  10  -8   0  286.37    8.00
 -10  -8   0  290.77    8.60
  10   8   0  279.17    8.20
 -10   8   0  287.37    8.40
  10   8   0  271.77    8.30
 -11  -8   0   28.70    2.90
  11  -8   0   26.20    2.30
  11   8   0   31.10    2.50
 -11   8   0   26.10    2.30
  11   8   0   23.30    3.00
   0  -9   0   -1.50    1.70
   0   9   0   -1.10    2.90
   0   9   0    0.30    2.10
   1  -9   0  293.87    9.20
  -1  -9   0  305.67    9.50
   1   9   0  312.67   10.00
  -1   9   0  310.17   10.20
   1   9   0  317.47   10.20
   2  -9   0   64.09    4.00
  -2  -9   0   65.89    4.40
  -2   9   0   63.29    5.10
   2   9   0   61.89    6.00
   2   9   0   61.99    4.90
  -2   9   0   71.99    5.00
   3  -9   0  917.21   22.70
  -3  -9   0  910.51   23.20
  -3   9   0  947.61   23.80
   3   9   0  914.21   23.70
   3   9   0  895.01   23.30
  -3   9   0  940.21   23.80
   4  -9   0  457.25   12.40
  -4  -9   0  450.95   13.10
  -4   9   0  449.06   13.50
   4   9   0  442.26   13.50
   4   9   0  451.85   13.00
   4   9   0  450.65   12.90
  -4   9   0  453.55   13.40
  -5  -9   0  855.01   21.90
   5  -9   0  839.52   21.10
  -5   9   0  871.81   22.10
   5   9   0  840.62   21.50
   5   9   0  841.52   21.70
   5   9   0  822.22   22.90
  -5   9   0  853.01   22.20
  -6  -9   0  165.58    6.50
   6  -9   0  167.98    5.80
   6   9   0  173.08    7.00
  -6   9   0  180.98    7.60
  -6   9   0  168.88    6.80
   6   9   0  172.48    6.20
  -7  -9   0   19.70    2.40
   7  -9   0   23.20    2.50
   7   9   0   18.50    2.70
   7   9   0   21.80    3.00
  -7   9   0   29.10    4.80
   8  -9   0  488.85   12.70
  -8  -9   0  486.35   13.10
  -8  -9   0  493.05   13.80
   8   9   0  470.85   13.70
   8   9   0  487.25   13.00
  -8   9   0  467.15   13.40
  -9  -9   0   11.50    1.90
   9  -9   0    9.40    1.50
  -9   9   0    9.40    1.80
   9   9   0    9.50    1.50
   9   9   0    9.80    1.60
  10  -9   0  280.97    7.50
 -10  -9   0  269.57    8.00
  10   9   0  267.47    7.60
 -10   9   0  273.07    7.60
  10   9   0  274.37    7.80
   0 -10   0   72.99    4.80
   0  10   0   83.79    5.70
   0  10   0   73.59    5.80
   1 -10   0  197.08    7.30
  -1 -10   0  193.28    7.40
   1  10   0  198.68    7.60
   1  10   0  202.48    8.10
  -1  10   0  206.08    8.20
  -2 -10   0  670.93   18.10
   2 -10   0  677.83   17.70
  -2  10   0  694.83   18.80
   2  10   0  679.83   18.00
   2  10   0  697.03   18.80
   3 -10   0  179.38    6.70
  -3 -10   0  172.98    7.30
   3  10   0  177.48    7.00
   3  10   0  172.68    7.70
  -3  10   0  172.58    7.20
  -3  10   0  181.58    7.70
  -4 -10   0  380.26   11.20
   4 -10   0  376.16   10.70
   4  10   0  374.96   11.50
   4  10   0  387.96   11.50
  -4  10   0  381.66   11.80
  -4  10   0  385.36   11.60
   5 -10   0   28.20    2.70
  -5 -10   0   28.20    3.50
   5  10   0   25.40    3.70
   5  10   0   26.70    3.80
  -5  10   0   21.30    3.10
  -5  10   0   35.90    3.60
  -6 -10   0  324.37    9.70
   6 -10   0  314.97    9.10
  -6  10   0  318.47   10.30
   6  10   0  339.77   10.20
  -6  10   0  323.97    9.90
   6  10   0  326.67    9.40
   7 -10   0  148.09    5.00
  -7 -10   0  143.09    5.60
   7  10   0  147.09    5.40
   7  10   0  142.29    5.30
  -7  10   0  141.19    4.70
  -7  10   0  129.39    5.50
   8 -10   0  261.57    7.40
  -8 -10   0  264.17    8.10
  -8  10   0  242.98    7.60
   8  10   0  266.87    7.70
  -9 -10   0   68.59    3.50
   9 -10   0   70.79    3.20
   9  10   0   72.49    3.50
  -9  10   0   64.19    3.10
   9  10   0   77.39    3.20
   0 -11   0   -1.60    1.70
   0  11   0   -2.80    1.80
   1 -11   0    6.10    1.80
  -1 -11   0    5.00    1.80
  -1  11   0    1.00    1.90
   1  11   0    5.70    2.60
   1  11   0    5.10    1.90
   2 -11   0  371.46   10.50
  -2 -11   0  374.86   10.70
  -2  11   0  363.86   11.20
   2  11   0  359.16   11.10
   2  11   0  375.26   11.00
  -3 -11   0  184.58    6.60
   3 -11   0  176.78    6.20
  -3  11   0  175.68    6.70
   3  11   0  186.28    6.90
   3  11   0  176.88    6.80
   4 -11   0  107.69    4.50
  -4 -11   0  114.99    5.10
   4  11   0  119.39    5.90
  -4  11   0  112.19    5.00
   4  11   0  104.99    5.50
   5 -11   0  193.68    6.20
  -5 -11   0  188.28    6.60
   5  11   0  195.08    6.50
  -5  11   0  186.38    6.70
  -6 -11   0   14.30    3.40
   6 -11   0    8.20    1.50
   6  11   0    6.70    1.40
   7 -11   0  135.29    4.70
  -7 -11   0  138.99    5.10
   7  11   0  138.19    4.70
  -7  11   0  137.79    4.30
  -7  11   0  132.89    4.80
   8 -11   0  308.37    8.20
  -8 -11   0  305.07    8.50
   8  11   0  311.17    8.30
   0 -12   0  178.18    6.30
   0  12   0  186.58    6.70
  -1 -12   0    6.50    2.10
   1 -12   0    2.90    1.90
  -1  12   0    4.70    1.80
   1  12   0    7.40    2.10
   1  12   0    3.30    1.80
  -2 -12   0    7.90    2.20
   2 -12   0    9.70    1.90
   2  12   0    7.60    2.00
   2  12   0   10.10    1.70
  -2  12   0    9.70    1.90
   3 -12   0   35.60    3.20
  -3 -12   0   29.30    3.90
  -3  12   0   31.60    3.10
   3  12   0   27.20    3.80
   3  12   0   34.40    2.60
   4 -12   0    5.40    1.90
  -4  12   0    6.20    1.90
   4  12   0    5.60    1.30
   4  12   0    4.60    3.40
   5 -12   0   32.40    3.20
  -5 -12   0   23.00    3.00
  -5  12   0   27.50    3.40
  -5  12   0   32.70    1.90
   5  12   0   33.80    2.30
   6 -12   0   15.40    2.00
   6  12   0   18.50    1.90
  -6  12   0   17.20    1.60
   0  13   0   -1.40    1.70
   1 -13   0  313.77    9.40
   1  13   0  324.77    8.20
  -1  13   0  327.97    9.20
   1  13   0  318.37    9.20
   2 -13   0   10.10    3.00
   2  13   0    6.00    2.20
  -2  13   0    5.70    1.60
   2  13   0    3.30    1.40
  -3  13   0  344.27    9.70
   3  13   0  351.06    9.00
  -3  13   0  357.16    8.90
 -14   0   1   -0.10    1.50
 -14   0   1    0.50    1.10
 -13   0   1    0.80    1.20
 -12   0   1    1.60    1.90
 -12   0   1    0.30    1.90
 -12   0   1    0.40    2.10
 -11   0   1 1464.75   36.00
 -11   0   1 1497.45   35.60
 -11   0   1 1476.55   35.60
  10   0  -1    0.90    3.20
 -10   0   1    1.40    2.10
 -10   0   1    4.20    2.60
 -10   0   1    3.40    2.10
   9   0  -1  516.55   14.30
  -9   0   1  504.35   14.00
  -9   0   1  532.85   14.20
  -9   0   1  509.35   14.80
  -8   0   1   -2.60    2.50
  -8   0   1    0.80    1.80
   8   0  -1   -3.70    2.20
  -8   0   1   -1.00    3.00
  -7   0   1    4.50    1.80
   7   0  -1    6.70    1.60
   6   0  -1    0.30    0.90
   5   0  -1  110.89    3.70
  -5   0   1  106.39    4.10
  -4   0   1    1.10    0.40
  -4   0   1    0.60    0.70
   4   0  -1    1.50    0.50
  -3   0   1  706.43   16.30
   3   0  -1  725.03   16.60
  -3   0   1  720.83   16.60
  -2   0   1    0.50    0.30
   1   0   1   68.39    1.90
   2   0   1    0.30    0.20
  -2   0  -1    0.80    0.40
   3   0   1  966.60   22.20
  -3   0  -1  966.40   21.80
  -4   0  -1    0.20    0.40
  -4   0  -1    0.00    0.80
   4   0   1    0.30    0.50
   5   0   1  275.07    7.60
   5   0   1  290.27   22.80
  -5   0  -1  256.67    8.00
  -5   0  -1  274.27    6.70
   6   0   1   -0.10    1.00
  -6   0  -1    0.50    1.50
   7   0   1  414.56   11.50
   7   0   1  421.26   12.00
  -7   0  -1  417.66   11.40
   8   0   1    0.90    2.10
  -8   0  -1   -1.40    3.20
  -8   0  -1    3.80    2.30
  -8   0  -1    2.20    1.70
  -9   0  -1   23.10    3.70
  -9   0  -1   25.00    4.00
   9   0   1   22.70    3.00
  -9   0  -1   19.50    3.20
 -10   0  -1    0.90    2.90
  10   0   1   -1.80    2.70
 -10   0  -1    0.80    1.70
 -10   0  -1    2.30    1.90
 -11   0  -1   -1.10    1.60
  11   0   1    2.60    2.80
 -11   0  -1    0.10    2.70
 -11   0  -1    1.90    1.90
 -12   0  -1    2.40    1.90
 -12   0  -1   -2.30    1.50
 -12   0  -1    0.60    2.10
 -13   0  -1  155.88    5.10
 -13   0  -1  161.88    5.80
 -13   0  -1  160.08    5.90
 -14   0  -1   -1.20    1.00
 -14  -1   1  172.78    5.20
 -14  -1   1  175.28    5.40
 -14   1   1  179.08    5.40
 -14   1   1  180.58    5.30
 -13  -1   1   34.40    2.50
 -13  -1   1   41.60    3.00
 -13   1   1   34.10    2.50
 -13   1   1   39.20    2.90
 -13   1   1   39.90    3.30
 -12  -1   1  321.47   10.10
 -12  -1   1  313.07    9.50
 -12  -1   1  301.77    9.20
 -12   1   1  304.07    9.20
 -12   1   1  316.07    9.60
 -12   1   1  310.07   10.00
 -11  -1   1  295.47    9.70
 -11  -1   1  292.07   10.00
 -11  -1   1  297.17    9.50
 -11   1   1  290.77    9.40
 -11   1   1  293.17    9.90
  11   1  -1  281.37   10.60
 -11   1   1  291.77    9.50
 -10  -1   1 1214.08   29.40
 -10  -1   1 1171.88   30.00
 -10  -1   1 1178.28   29.30
 -10   1   1 1188.48   29.40
 -10   1   1 1215.78   30.00
  10   1  -1 1202.28   29.40
 -10   1   1 1239.58   29.50
  -9  -1   1    4.90    2.10
  -9  -1   1    2.30    2.30
  -9  -1   1    7.30    2.70
  -9   1   1    5.80    2.10
  -9   1   1    3.80    2.00
   9   1  -1    4.20    2.10
  -9   1   1    6.50    2.50
  -8  -1   1   63.99    5.10
   8  -1  -1   59.39    5.30
  -8  -1   1   66.49    4.30
  -8  -1   1   63.89    5.90
  -8   1   1   63.99    4.00
  -8   1   1   58.09    5.50
  -8   1   1   63.89    4.90
  -7  -1   1  904.91   22.30
   7  -1  -1  936.11   22.70
   7   1  -1  910.41   23.00
  -7   1   1  914.51   22.30
   6  -1  -1  517.95   14.30
  -6  -1   1  532.85   13.30
   6   1  -1  537.75   14.00
  -6   1   1  512.55   14.10
  -6   1   1  604.34   15.20
  -5  -1   1 6134.09  143.29
  -5   1   1 6336.67  142.99
   5   1  -1 6462.95  143.29
   5   1  -1 6777.22  167.58
  -4  -1   1 1425.76   33.20
  -4  -1   1 1440.06   32.90
   4  -1  -1 1424.66   32.80
   4   1  -1 1441.66   33.10
  -4   1   1 1409.36   32.90
   4   1  -1 1576.24   47.70
   4   1  -1 1398.26   32.80
  -3  -1   1 1454.05   33.50
   3  -1  -1 1451.05   33.30
   3   1  -1 1473.75   33.50
   3   1  -1 1485.35   33.60
  -3   1   1 1434.16   33.30
   3   1  -1 1591.44   43.90
  -2  -1   1 2226.08   48.10
  -2  -1   1 2240.18   48.00
   2   1  -1 2055.09   54.49
   2   1  -1 2068.99   47.90
   1  -1  -1    1.70    1.00
  -1  -1   1    3.00    0.50
   1  -1  -1    2.20    0.20
   1   1  -1    1.70    0.30
   2   1   1 3828.22   95.99
   3  -1   1 2869.61   64.49
  -3  -1  -1 2915.01   64.79
  -3  -1  -1 2910.01   64.59
  -3   1  -1 2915.31   64.59
   3   1   1 2846.12   64.69
   4  -1   1  365.76    9.10
  -4  -1  -1  367.66    9.10
  -4  -1  -1  321.07    9.30
   4   1   1  369.36    9.30
  -4   1  -1  374.56    9.30
  -5  -1  -1 2197.78   49.70
  -5  -1  -1 2129.79   50.39
   5  -1   1 2171.78   49.99
  -5   1  -1 2159.18   50.19
   5   1   1 2326.77   52.09
   6  -1   1  534.75   13.80
  -6  -1  -1  528.85   13.80
  -6  -1  -1  545.05   13.40
  -6   1  -1  529.75   13.80
   6   1   1  534.75   13.80
   6   1   1  542.85   14.10
   7  -1   1 3286.57   75.39
   7  -1   1 3269.87   74.59
  -7  -1  -1 3322.77   74.79
  -7   1  -1 3352.16   74.89
   7   1   1 3339.67   74.79
   7   1   1 3214.38   75.69
  -8  -1  -1   88.99    5.40
   8  -1   1   80.79    5.50
  -8  -1  -1   89.09    4.50
  -8  -1  -1   74.29    7.00
  -8   1  -1   85.99    5.10
   8   1   1   75.89    6.80
  -8   1  -1   81.79    6.50
  -8   1  -1   87.79    4.40
  -9  -1  -1   30.50    3.60
  -9  -1  -1   33.60    4.30
  -9  -1  -1   26.80    5.10
  -9   1  -1   34.20    3.40
   9   1   1   29.60    3.90
  -9   1  -1   31.40    3.80
  -9   1  -1   30.30    4.00
 -10  -1  -1  419.06   12.90
 -10  -1  -1  413.56   12.10
 -10  -1  -1  422.96   12.30
 -10   1  -1  422.66   12.20
 -10   1  -1  413.96   12.30
  10   1   1  417.86   12.30
 -10   1  -1  413.26   12.80
 -11  -1  -1    0.30    2.70
 -11  -1  -1    0.90    1.60
 -11  -1  -1    2.40    2.10
 -11   1  -1    3.30    2.60
  11   1   1    0.20    2.20
 -11   1  -1    1.30    1.40
 -11   1  -1    1.60    2.00
 -12  -1  -1   93.09    4.70
 -12  -1  -1   84.99    4.20
 -12  -1  -1   94.29    4.80
 -12   1  -1   91.89    4.60
 -12   1  -1   91.99    4.70
  12   1   1   92.89    5.20
 -12   1  -1   91.09    4.20
 -13  -1  -1   10.80    2.00
 -13  -1  -1   15.80    2.10
 -13   1  -1   12.50    2.00
 -13   1  -1   14.30    1.70
 -13   1  -1   17.60    2.30
 -14   1  -1    3.90    1.00
 -14  -2   1  126.99    4.00
 -14  -2   1  127.59    4.20
 -14   2   1  121.59    4.10
 -14   2   1  123.29    4.00
 -13  -2   1   13.30    1.60
 -13  -2   1   15.20    2.50
 -13   2   1   14.90    2.40
 -13   2   1   14.40    1.90
 -12  -2   1  406.76   11.50
 -12  -2   1  407.76   12.20
 -12   2   1  402.16   11.90
 -12   2   1  418.66   11.60
  12   2  -1  393.36   11.20
 -12   2   1  390.46   11.30
 -11  -2   1  182.18    7.00
 -11  -2   1  178.68    7.50
 -11  -2   1  178.68    7.10
 -11   2   1  178.08    6.90
  11   2  -1  180.88    8.60
 -11   2   1  179.08    7.30
 -10  -2   1    4.30    2.30
 -10  -2   1    2.00    2.60
 -10  -2   1   -1.90    2.10
 -10   2   1    3.10    1.80
 -10   2   1    4.20    2.00
 -10   2   1    0.60    2.30
  10   2  -1   -0.10    2.20
  -9  -2   1   85.49    5.20
  -9  -2   1   87.09    6.00
  -9  -2   1   80.09    5.00
  -9   2   1   89.39    4.60
  -9   2   1   78.79    4.90
   9   2  -1   82.29    4.70
  -9   2   1   88.09    5.70
  -8  -2   1    4.50    2.70
  -8  -2   1    5.30    2.30
  -8  -2   1    9.60    3.20
  -8   2   1    3.20    2.50
  -8   2   1    1.40    1.60
  -8   2   1    2.30    2.70
  -7  -2   1 1586.54   36.60
  -7  -2   1 1485.65   36.20
   7  -2  -1 1545.45   36.40
  -7   2   1 1580.74   36.40
   7   2  -1 1557.94   37.30
  -6  -2   1  239.88    7.80
  -6  -2   1  248.38    7.60
   6  -2  -1  241.98    6.90
   6   2  -1  248.58    7.60
  -6   2   1  238.28    7.70
  -6   2   1  248.88    7.50
  -5  -2   1   92.79    4.00
  -5  -2   1   87.59    4.50
   5  -2  -1   91.49    3.10
   5   2  -1   96.39    3.70
   5   2  -1   92.29    3.50
  -5   2   1   97.39    3.50
  -4  -2   1  118.69    4.30
   4  -2  -1  119.19    3.40
  -4  -2   1  121.99    4.20
   4   2  -1  122.79    4.00
  -4   2   1  123.09    3.60
   4   2  -1  120.69    3.90
   3  -2  -1  759.42   17.80
  -3  -2   1  766.72   19.60
  -3  -2   1  774.82   18.50
   3  -2  -1  802.12   17.70
   3   2  -1  815.82   18.50
   3   2  -1  787.22   18.60
  -3   2   1  795.82   17.90
  -2  -2   1 1184.58   34.50
   2  -2  -1 1187.28   25.80
   2  -2  -1 1184.48   26.20
   2  -2  -1 1165.28   35.00
  -2  -2   1 1190.58   26.80
   2   2  -1 1163.08   26.40
  -2   2   1 1165.78   25.80
   2   2  -1 1052.39   33.60
   2   2  -1 1157.98   26.70
  -1  -2   1 2478.85   55.29
  -1   2   1 2449.35   62.99
   0  -2  -1 1350.56   36.80
   0  -2   1 1357.46   35.10
   0  -2  -1 1360.76   30.30
   0  -2   1 1408.16   31.00
   0  -2  -1 1347.27   30.90
   0   2   1 1368.56   30.30
   0   2  -1 1369.26   35.70
   0   2  -1 1373.06   30.90
   0   2   1 1350.96   37.20
  -1  -2  -1 1710.13   48.00
  -2  -2  -1 1299.87   29.40
  -2  -2  -1 1262.37   29.00
   2  -2   1 1300.67   28.90
  -2   2  -1 1286.17   28.80
  -2   2  -1 1280.77   28.80
   2   2   1 1240.88   29.00
   3   2   1 1982.50   60.59
  -4  -2  -1 1559.64   37.00
   4  -2   1 1554.14   36.50
  -4  -2  -1 1698.03   37.20
   4   2   1 1597.94   36.90
  -4   2  -1 1626.54   36.70
  -5  -2  -1 2466.25   54.79
   5  -2   1 2326.37   54.29
  -5   2  -1 2364.96   54.59
   5   2   1 2422.76   54.79
  -6  -2  -1  467.25   12.30
  -6  -2  -1  457.55   12.80
   6  -2   1  474.05   12.20
   6   2   1  451.75   12.50
  -6   2  -1  465.55   12.30
  -7  -2  -1  340.17    9.70
   7  -2   1  319.67    9.80
  -7   2  -1  356.46    9.90
   7   2   1  342.57    9.70
   7   2   1  321.87   11.20
  -8  -2  -1  253.47   10.20
  -8  -2  -1  262.27    8.40
  -8  -2  -1  265.47    9.00
  -8   2  -1  258.87    8.60
   8   2   1  267.77    8.40
  -8   2  -1  255.77    9.70
  -8   2  -1  275.87    8.50
  -9  -2  -1   -1.60    3.20
  -9  -2  -1   -1.00    2.50
  -9  -2  -1    1.80    1.90
  -9   2  -1    5.10    1.90
   9   2   1    4.30    2.00
  -9   2  -1    3.50    2.30
  -9   2  -1    2.70    3.00
 -10  -2  -1  426.96   13.10
 -10  -2  -1  426.96   12.40
 -10  -2  -1  435.66   12.60
 -10   2  -1  428.66   12.40
 -10   2  -1  431.16   12.60
 -10   2  -1  430.06   13.00
  10   2   1  431.86   12.60
 -11  -2  -1  476.95   14.00
 -11  -2  -1  483.85   13.50
 -11  -2  -1  475.65   13.20
 -11   2  -1  483.05   13.90
 -11   2  -1  483.95   13.50
  11   2   1  488.15   13.40
 -11   2  -1  499.15   13.60
 -12  -2  -1    0.50    1.60
 -12  -2  -1   -2.70    2.10
 -12  -2  -1   -0.50    1.90
 -12   2  -1   -1.00    1.40
 -12   2  -1    0.40    1.90
  12   2   1   -0.50    2.00
 -12   2  -1   -0.40    1.90
 -13  -2  -1  150.98    7.30
 -13  -2  -1  144.29    4.70
 -13   2  -1  140.49    5.10
 -13   2  -1  136.99    4.70
 -13   2  -1  151.58    5.20
 -13  -3   1   33.90    2.80
 -13  -3   1   30.90    2.50
 -13   3   1   27.00    2.20
 -13   3   1   33.90    2.50
  13   3  -1   32.70    3.70
 -12  -3   1  231.78    7.80
 -12  -3   1  232.98    7.40
 -12   3   1  247.08   10.30
  12   3  -1  237.48    7.50
 -12   3   1  225.58    7.40
 -12   3   1  230.98    7.80
 -11  -3   1   96.79    5.10
 -11  -3   1   97.19    5.70
 -11   3   1   90.39    4.40
 -11   3   1   87.59    4.80
 -11   3   1   94.29    5.30
  11   3  -1   97.69    4.70
 -10  -3   1   12.80    3.10
 -10  -3   1    7.90    2.40
 -10  -3   1   13.30    2.80
 -10   3   1    8.10    2.20
 -10   3   1    9.60    2.50
 -10   3   1    7.70    2.30
  10   3  -1    8.80    2.30
  -9  -3   1  423.26   12.40
  -9  -3   1  422.46   12.40
  -9  -3   1  421.06   13.40
  -9   3   1  432.56   12.30
  -9   3   1  429.16   12.80
  -9   3   1  429.56   12.30
  -8  -3   1   15.70    2.80
  -8  -3   1   19.60    3.40
  -8  -3   1   12.90    3.40
  -8   3   1   11.10    1.90
  -8   3   1   15.40    3.00
  -8   3   1   19.90    2.80
  -7  -3   1   27.40    4.60
  -7  -3   1   16.20    2.30
  -7   3   1   13.30    4.10
  -6  -3   1 2171.68   49.40
   6  -3  -1 2176.38   75.09
   6  -3  -1 2199.48  116.09
  -6  -3   1 2035.30   50.49
   6   3  -1 2119.89   49.90
  -6   3   1 2175.78   49.30
   5  -3  -1 9999.00  241.28
  -5  -3   1 9518.85  213.88
  -5  -3   1 9543.25  214.88
  -5   3   1 9411.86  213.28
   5   3  -1 9949.50  214.48
  -5   3   1 9385.56  213.78
  -4  -3   1   80.49    4.00
   4  -3  -1   82.99    9.70
  -4  -3   1   81.79    3.90
  -4   3   1   87.79    2.70
   4   3  -1   81.19    3.20
   4   3  -1   83.89    3.40
   3  -3  -1 1545.35   35.20
   3  -3  -1 1527.65   48.80
  -3  -3   1 1557.84   36.30
  -3  -3   1 1625.34   48.50
   3   3  -1 1503.25   36.00
  -3   3   1 1521.15   34.70
   3   3  -1 1622.74   47.60
   2  -3  -1 1272.87   39.80
  -2  -3   1 1304.57   29.60
   2  -3  -1 1303.07   28.90
   2   3  -1 1197.78   28.80
   2   3  -1 1274.17   37.00
   2   3  -1 1223.48   29.30
   1  -3  -1 4283.97   94.39
  -1  -3   1 4217.18   94.79
   1   3  -1 4228.78  102.59
  -1   3   1 4204.28  106.29
   0  -3   1  510.05   18.00
   0  -3  -1  495.35   19.20
   0   3   1  497.85   12.40
   0   3   1  511.45   11.50
   0   3  -1  490.45   12.30
   0   3  -1  507.25   18.80
   0   3   1  512.25   20.10
  -1  -3  -1  787.52   17.80
   1  -3   1  773.82   18.30
   1  -3   1  783.62   25.70
  -1  -3  -1  782.82   18.50
   1   3   1  726.43   18.40
  -1   3  -1  809.92   18.20
   1   3   1  765.32   17.70
   1   3   1  756.42   26.60
  -2  -3  -1  784.72   18.50
   2  -3   1  785.42   18.50
  -2  -3  -1  799.72   19.10
   2  -3   1  781.02   27.90
   2   3   1  794.52   28.60
  -2   3  -1  814.62   18.20
   2   3   1  780.42   18.40
  -2   3  -1  788.12   18.40
  -3  -3  -1  967.40   37.10
   3  -3   1  935.11   21.70
  -3  -3  -1  955.60   22.30
  -3  -3  -1  938.51   22.70
   3  -3   1  940.61   34.20
   3   3   1  917.41   22.00
   3   3   1  952.50   36.30
  -3   3  -1  953.70   21.80
  -3   3  -1  914.01   21.60
  -4  -3  -1  121.19    4.80
  -4  -3  -1  125.79    5.00
   4   3   1  101.69   16.00
   4   3   1  125.89    4.20
  -4   3  -1  126.19    4.10
  -5  -3  -1   61.59    4.40
  -5  -3  -1   62.49    4.50
  -5   3  -1   59.69    3.60
  -5   3  -1   63.79    3.70
   5   3   1   73.79    3.30
  -6  -3  -1  102.19    4.70
  -6  -3  -1  103.79    4.80
   6   3   1   95.99    4.70
  -6   3  -1  102.09    4.40
  -7  -3  -1  761.32   19.10
  -7   3  -1  776.02   19.50
   7   3   1  740.83   20.70
  -8  -3  -1   74.59    4.50
  -8  -3  -1   71.19    5.80
  -8  -3  -1   75.49    7.10
  -8   3  -1   74.29    4.10
  -8   3  -1   71.29    5.90
  -8   3  -1   75.59    4.90
   8   3   1   78.69    4.40
  -9  -3  -1   67.89    7.70
  -9  -3  -1   68.79    4.60
  -9   3  -1   74.69    4.70
   9   3   1   66.89    4.50
  -9   3  -1   72.29    4.30
 -10  -3  -1  123.79    6.10
 -10  -3  -1  131.09    7.00
 -10  -3  -1  125.89    6.10
  10   3   1  129.29    6.10
 -10   3  -1  131.09    5.90
 -10   3  -1  124.49    5.80
 -10   3  -1  128.09    6.50
 -11  -3  -1  208.88    8.20
 -11  -3  -1  199.98    7.00
 -11  -3  -1  220.18    7.50
 -11   3  -1  215.68    8.00
  11   3   1  201.98    7.10
 -11   3  -1  208.48    7.40
 -11   3  -1  200.38    7.10
 -12  -3  -1  437.96   11.60
 -12  -3  -1  447.06   12.00
 -12  -3  -1  434.96   11.80
  12   3   1  442.86   12.00
 -12   3  -1  409.06   11.70
 -12   3  -1  443.66   11.80
 -12   3  -1  443.06   12.10
 -13  -3  -1   13.30    1.60
  13   3   1   16.00    2.20
 -13   3  -1   16.20    1.80
 -13  -4   1  211.28    6.40
 -13  -4   1  211.58    6.10
 -13   4   1  214.68    6.30
  13   4  -1  212.88    6.70
 -13   4   1  208.48    6.10
 -12  -4   1   17.60    2.80
 -12  -4   1   18.90    2.70
 -12   4   1   15.70    2.50
  12   4  -1   20.30    2.90
 -12   4   1   18.10    2.30
 -11  -4   1  190.48    7.10
 -11  -4   1  199.88    7.90
 -11   4   1  188.58    6.70
 -11   4   1  200.68    7.40
 -11   4   1  185.68    6.80
  11   4  -1  187.28    6.80
 -10  -4   1  129.49    6.10
 -10  -4   1  124.49    6.70
 -10   4   1  127.59    5.70
 -10   4   1  119.29    5.70
  10   4  -1  130.19    6.10
 -10   4   1  117.79    6.00
  -9  -4   1  482.65   13.60
  -9  -4   1  480.65   14.60
  -9   4   1  482.35   14.00
  -9   4   1  482.85   13.60
  -9   4   1  472.25   13.30
  -8  -4   1  710.43   19.80
  -8  -4   1  731.73   19.00
  -8  -4   1  739.83   19.00
  -8   4   1  738.43   18.90
  -8   4   1  760.32   18.90
  -8   4   1  724.73   19.30
   8   4  -1  693.23   19.30
  -7  -4   1  283.57    9.00
  -7  -4   1  275.87   10.30
   7   4  -1  261.37    9.70
  -7   4   1  292.27    9.50
  -7   4   1  297.57    9.70
  -7   4   1  294.67    8.80
   6  -4  -1  713.23   39.30
  -6  -4   1  728.33   18.40
  -6   4   1  746.23   18.30
   6   4  -1  718.03   19.00
  -5  -4   1    2.50    1.70
   5  -4  -1    2.70    4.50
   5   4  -1    1.60    1.30
   5   4  -1    1.10    1.40
  -5   4   1    2.30    1.60
   4  -4  -1  177.18    5.10
   4  -4  -1  179.78   15.10
   4   4  -1  178.78   16.20
  -4   4   1  175.98    4.40
   4   4  -1  173.48    5.60
   4   4  -1  170.58    6.10
   3  -4  -1  662.83   16.10
  -3  -4   1  635.04   29.20
  -3  -4   1  646.34   17.20
   3  -4  -1  676.53   29.80
   3   4  -1  674.03   16.20
   3   4  -1  647.44   16.70
   3   4  -1  673.13   27.50
   2  -4  -1   22.10    5.10
   2  -4  -1   21.40    2.00
  -2  -4   1   25.30    2.80
   2   4  -1   23.70    1.80
   2   4  -1   20.30    5.90
   2   4  -1   22.70    1.50
  -1  -4   1 4133.29   91.99
   1  -4  -1 4022.00   91.59
  -1  -4   1 4216.08  105.69
   1  -4  -1 4090.99  105.19
   1   4  -1 3989.20   91.69
  -1   4   1 4133.29  107.99
   1   4  -1 3969.60  103.19
   1   4  -1 4067.29   90.89
   0  -4  -1  470.45   12.10
   0  -4   1  469.55   19.20
   0  -4   1  470.25   12.20
   0  -4  -1  465.35   20.60
   0   4   1  459.55   10.80
   0   4  -1  482.25   11.20
   0   4  -1  444.06   20.40
   0   4   1  460.55   21.90
   0   4  -1  460.55   11.90
  -1  -4  -1   30.70    6.10
   1  -4   1   34.80    5.10
   1  -4   1   34.80    2.40
  -1  -4  -1   33.60    2.70
  -1   4  -1   35.80    1.90
   1   4   1   35.80    7.40
   1   4   1   36.50    1.50
   1   4   1   35.10    2.10
  -2  -4  -1 2648.83   59.39
  -2  -4  -1 2628.84   60.39
   2  -4   1 2726.53   59.79
   2  -4   1 2583.44   73.29
   2   4   1 2542.25   74.39
   2   4   1 2636.14   59.29
  -2   4  -1 2632.04   59.59
  -2   4  -1 2687.33   58.99
  -3  -4  -1 7369.46  163.08
   3  -4   1 7475.75  182.88
  -3  -4  -1 7179.58  163.98
   3   4   1 7235.88  182.78
   3   4   1 7353.16  162.88
  -4  -4  -1  230.88   18.90
   4  -4   1  219.38   16.80
   4   4   1  220.18    6.70
  -4   4  -1  208.38    6.30
  -5  -4  -1  184.78    6.60
   5  -4   1  194.98   18.00
  -5  -4  -1  184.28    6.50
   5   4   1  177.68    6.20
  -5   4  -1  185.98    6.20
  -5   4  -1  183.38    7.30
  -6  -4  -1  662.23   16.70
   6  -4   1  617.84   37.20
  -6  -4  -1  657.83   16.50
  -6   4  -1  664.83   16.60
   6   4   1  615.14   17.10
  -7  -4  -1 1049.59   25.40
  -7  -4  -1  996.80   26.60
  -7  -4  -1 1088.39   25.70
  -7   4  -1 1043.50   26.10
   7   4   1  979.10   25.80
  -7   4  -1 1059.89   25.50
  -7   4  -1 1062.79   25.60
  -8  -4  -1    7.40    2.30
  -8  -4  -1    3.90    3.40
  -8  -4  -1    8.70    3.50
   8   4   1   11.80    2.20
   8   4   1   10.00    3.60
  -8   4  -1    7.20    2.40
  -8   4  -1    9.50    2.90
  -8   4  -1    6.70    1.70
  -9  -4  -1   26.60    3.80
  -9  -4  -1   28.70    4.00
  -9  -4  -1   23.30    3.80
  -9   4  -1   23.60    4.50
  -9   4  -1   27.20    3.40
  -9   4  -1   23.20    3.70
   9   4   1   23.90    3.80
 -10  -4  -1    6.00    2.90
 -10  -4  -1    0.20    3.70
 -10  -4  -1    3.60    2.80
  10   4   1    2.40    2.20
 -10   4  -1    2.00    2.10
 -10   4  -1   -0.30    1.80
 -10   4  -1    1.80    2.40
 -11  -4  -1   54.69    5.20
 -11  -4  -1   46.70    4.00
 -11  -4  -1   52.59    5.00
 -11   4  -1   52.79    4.00
 -11   4  -1   57.59    4.60
  11   4   1   49.99    3.50
 -11   4  -1   54.99    3.30
 -12  -4  -1    4.00    2.20
 -12  -4  -1    3.20    1.80
 -12   4  -1    0.80    1.30
  12   4   1    1.30    1.60
 -12   4  -1    3.90    1.30
 -12   4  -1    2.80    1.60
  13   4   1  199.88    6.20
 -13  -5   1   29.30    2.60
  13   5  -1   27.40    2.80
 -13   5   1   28.80    2.30
 -12  -5   1  257.77    7.40
 -12  -5   1  251.07    7.80
 -12   5   1  248.78    7.50
  12   5  -1  263.57    7.80
 -12   5   1  240.18    7.10
 -11  -5   1  150.58    5.50
 -11  -5   1  167.78    7.10
 -11   5   1  155.98    6.40
  11   5  -1  155.88    5.90
 -11   5   1  153.68    6.00
 -10  -5   1   99.79    6.10
 -10  -5   1  105.29    5.90
 -10   5   1  104.19    5.20
 -10   5   1  102.59    5.50
  10   5  -1  101.09    4.80
  -9  -5   1    2.10    3.00
  -9  -5   1   -0.10    2.60
  -9   5   1    0.80    1.60
  -9   5   1    6.10    2.20
   9   5  -1    1.60    2.90
  -9   5   1    0.70    2.20
  -8  -5   1  181.38    7.00
  -8  -5   1  177.18    9.50
  -8  -5   1  171.58    7.90
  -8   5   1  187.48    7.10
   8   5  -1  172.98    7.50
  -8   5   1  176.08   10.20
  -8   5   1  181.38    6.70
  -7  -5   1  447.36   12.60
  -7  -5   1  446.66   13.60
  -7   5   1  450.85   12.50
  -7   5   1  462.85   13.10
  -7   5   1  440.56   12.70
   7   5  -1  417.06   12.70
  -6   5   1  307.07   10.10
  -6   5   1  309.67    9.40
  -5  -5   1   13.30    2.20
   5  -5  -1   14.20    7.10
   5   5  -1   11.10    2.00
   5   5  -1   10.00    2.10
  -5   5   1   13.60    2.40
  -5   5   1   13.60    3.20
   4  -5  -1  602.44   31.80
  -4  -5   1  637.74   32.60
  -4  -5   1  559.74   15.00
   4   5  -1  586.74   15.20
  -4   5   1  547.35   15.10
   4   5  -1  584.74   16.10
  -3  -5   1   13.10    7.90
   3  -5  -1   16.30    3.40
   3  -5  -1   14.70    7.00
  -3  -5   1   11.40    2.00
   3   5  -1   19.40   11.40
   3   5  -1   13.10    1.80
   2  -5  -1  473.05   12.80
   2  -5  -1  489.35   24.70
   2   5  -1  449.46   24.30
   2   5  -1  463.95   12.90
   2   5  -1  476.15   12.00
  -1  -5   1  638.84   29.60
  -1  -5   1  645.94   17.70
   1  -5  -1  676.93   17.30
   1   5  -1  687.43   16.00
  -1   5   1  651.23   32.70
   1   5  -1  678.73   17.10
   1   5  -1  677.13   29.80
   0  -5   1  437.06   20.70
   0  -5  -1  448.76   23.10
   0  -5  -1  437.96   12.30
   0  -5   1  420.76   12.20
   0   5  -1  421.06   11.50
   0   5   1  425.26   10.10
   0   5  -1  399.36   22.80
   0   5  -1  437.46   10.50
   0   5   1  411.66   24.80
  -1  -5  -1   34.30    5.40
   1  -5   1   29.90    5.90
   1  -5   1   27.30    3.40
   1   5   1   27.00    1.50
   1   5   1   23.70   10.70
  -1   5  -1   26.50    2.10
  -1   5  -1   29.10    1.50
   2  -5   1  553.44   14.70
   2  -5   1  529.25   30.20
   2   5   1  560.94   13.60
  -2   5  -1  571.94   14.20
  -2   5  -1  544.95   14.40
   3  -5   1 1783.92   59.29
   3  -5   1 1801.82   41.00
   3   5   1 1723.53   40.40
  -3   5  -1 1640.44   40.40
  -3   5  -1 1794.22   39.80
  -3   5  -1 1768.22   40.50
  -3   5  -1 1725.43   40.40
  -4  -5  -1    4.70    2.20
   4  -5   1    0.10    4.60
  -4  -5  -1    5.90    2.30
  -4   5  -1    0.70    2.10
   4   5   1   -0.80    1.40
  -4   5  -1    0.60    1.50
  -5  -5  -1  421.96   11.70
  -5  -5  -1  426.06   11.50
  -5   5  -1  418.46   11.40
  -5   5  -1  405.16   11.70
   5   5   1  399.46   11.80
  -6  -5  -1  268.47    8.40
  -6   5  -1  265.87    9.00
  -6   5  -1  260.27    8.20
  -6   5  -1  267.07    9.30
   6   5   1  254.37    9.00
  -7  -5  -1  346.47   10.50
  -7  -5  -1  328.77   10.20
   7   5   1  349.57   10.40
  -7   5  -1  341.57   10.40
  -7   5  -1  342.77   10.20
  -7   5  -1  343.07   10.90
   7   5   1  340.07   10.80
  -8  -5  -1  547.75   15.20
  -8   5  -1  529.45   15.70
   8   5   1  595.04   15.60
  -8   5  -1  577.24   16.30
  -9  -5  -1   90.99    5.70
  -9  -5  -1  103.29    6.70
   9   5   1  107.19    5.60
   9   5   1   97.89    6.70
  -9   5  -1  104.79    5.70
  -9   5  -1  101.29    5.30
  -9   5  -1  101.29    5.30
 -10  -5  -1   22.30    3.60
 -10  -5  -1   20.00    2.60
 -10   5  -1   21.50    3.40
 -10   5  -1   26.70    2.70
 -10   5  -1   24.70    3.90
  10   5   1   24.90    2.90
 -11  -5  -1  462.05   12.90
  11   5   1  470.95   12.90
 -11   5  -1  465.85   12.60
 -11   5  -1  469.95   12.90
 -11   5  -1  477.45   14.60
 -12  -5  -1   68.59    5.00
  12   5   1   62.49    3.40
 -12   5  -1   57.99    3.30
  13  -5   1  164.28    4.90
  13   5   1  156.78    5.30
 -12  -6   1    0.30    1.60
 -12   6   1    3.50    1.30
  12   6  -1    1.90    1.60
 -11  -6   1    5.50    1.80
 -11   6   1    4.20    1.40
  11   6  -1    1.10    1.50
 -11   6   1    4.60    1.60
 -10  -6   1   33.90    4.70
 -10   6   1   35.10    3.90
  10   6  -1   44.40    5.20
  10   6  -1   32.00    3.10
 -10   6   1   27.70    3.80
  -9  -6   1  137.69    7.00
  -9   6   1  133.89    6.00
   9   6  -1  129.39    6.30
   9   6  -1  138.99    6.30
  -9   6   1  124.49    6.00
  -8  -6   1  136.89    6.30
   8   6  -1  137.59    6.30
  -8   6   1  123.69    6.30
  -8   6   1  134.29    6.20
  -7  -6   1    7.20    2.20
   7   6  -1    9.40    2.50
  -7   6   1    8.70    2.50
  -7   6   1    6.10    3.40
  -6  -6   1  590.74   16.10
  -6   6   1  591.44   16.50
  -6   6   1  619.04   16.50
  -5  -6   1    7.70    2.30
  -5   6   1   11.50    2.70
  -5   6   1    9.60    2.80
   4  -6  -1   95.39   16.20
  -4  -6   1   99.59    4.50
  -4  -6   1   81.69   16.80
   4   6  -1   95.89    5.80
  -4   6   1   99.99    5.00
   4   6  -1   90.49    4.80
   4   6  -1   85.59    5.90
   3  -6  -1  158.88   16.90
  -3  -6   1  135.49   18.40
   3  -6  -1  151.88    5.10
  -3  -6   1  148.39    5.50
   3   6  -1  150.58    5.40
  -3   6   1  153.58    5.90
   3   6  -1  152.58    6.70
   3   6  -1  146.69    6.20
   2  -6  -1  777.12   35.80
  -2  -6   1  743.63   18.60
   2  -6  -1  731.83   18.20
   2   6  -1  751.62   18.90
   2   6  -1  792.02   18.70
  -2   6   1  755.32   18.90
   2   6  -1  744.23   20.00
   1  -6  -1 3522.05  100.99
   1  -6  -1 3303.57   77.69
  -1  -6   1 3486.35   77.89
   1   6  -1 3561.34   77.99
  -1   6   1 3405.46   78.39
   1   6  -1 3498.85   79.69
   1   6  -1 3465.65   78.29
   0  -6  -1 1895.51   45.90
   0  -6   1 2175.48   66.09
   0  -6   1 1957.70   45.90
   0  -6  -1 2194.48   70.19
   0   6  -1 2007.20   45.70
   0   6   1 1933.51   46.40
   0   6   1 2006.50   45.20
   0   6  -1 1978.00   47.40
   0   6  -1 1977.40   46.40
   1  -6   1   34.00    2.60
   1  -6   1   37.00    8.00
  -1  -6  -1   40.60    3.80
   1   6   1   35.30    3.50
  -1   6  -1   32.60    3.20
   1   6   1   44.80    2.20
  -1   6  -1   40.50    3.00
  -1   6  -1   37.90    2.10
   2  -6   1   56.19   10.30
  -2  -6  -1   55.49    4.00
   2   6   1   55.79    4.20
   2   6   1   55.39    2.90
  -2   6  -1   54.59    3.70
  -2   6  -1   54.99    3.50
  -2   6  -1   55.69    2.30
   3  -6   1  614.04   32.50
   3  -6   1  601.44   15.00
  -3  -6  -1  602.14   15.50
   3   6   1  602.64   15.50
  -3   6  -1  616.94   15.70
   3   6   1  586.64   15.90
   4  -6   1  114.59   16.90
  -4  -6  -1  100.79   20.90
  -4  -6  -1  106.79    5.60
  -4  -6  -1  124.89    5.40
   4   6   1  119.39    6.60
   4   6   1  106.29    5.80
   4   6   1  109.59    5.20
  -4   6  -1  115.49    5.20
  -5  -6  -1  190.68    6.70
  -5   6  -1  173.78    7.40
  -5   6  -1  169.18    6.80
   5   6   1  169.18    7.00
  -5   6  -1  181.18    6.40
  -6  -6  -1    6.40    2.30
  -6  -6  -1    3.50    2.20
  -6   6  -1    7.30    2.60
  -6   6  -1    3.30    3.00
   6   6   1    4.90    2.40
  -6   6  -1    5.10    1.80
  -7  -6  -1  898.91   22.60
  -7  -6  -1  879.01   22.20
  -7   6  -1  907.71   22.50
   7   6   1  885.81   22.50
   7   6   1  872.21   26.50
  -7   6  -1  887.41   24.80
  -7   6  -1  889.91   22.20
  -8  -6  -1  126.29    6.20
  -8  -6  -1  132.29    6.30
  -8  -6  -1  131.69    7.30
  -8   6  -1  123.49    5.70
  -8   6  -1  135.29    6.00
  -8   6  -1  145.89    6.30
   8   6   1  123.39    5.90
   8   6   1  120.99    6.20
  -9  -6  -1  438.76   13.60
  -9   6  -1  455.05   12.40
  -9   6  -1  441.26   12.90
   9   6   1  441.46   12.90
 -10  -6  -1   23.40    3.60
  10   6   1   24.00    2.90
 -10   6  -1   23.70    3.80
 -11  -6  -1   12.30    2.20
  11  -6   1   17.10    2.10
 -11   6  -1   19.50    2.50
  11   6   1   14.40    1.90
  12  -6   1   36.40    2.30
  12   6   1   34.60    2.50
 -12  -7   1   17.50    2.60
  12  -7  -1   23.20    2.20
 -12   7   1   24.60    2.40
  12   7  -1   20.00    2.40
  11  -7  -1   71.79    3.30
 -11  -7   1   71.99    3.80
  11   7  -1   73.79    3.60
 -11   7   1   81.89    3.60
  10  -7  -1  295.37    8.50
 -10  -7   1  302.47    9.60
  10   7  -1  300.67    8.80
  10   7  -1  300.47    9.10
 -10   7   1  291.27   11.10
   9  -7  -1   53.29    3.10
  -9  -7   1   54.09    5.10
   9   7  -1   49.40    3.50
   9   7  -1   52.79    4.30
  -9   7   1   59.29    4.30
  -8  -7   1  110.49    5.90
   8  -7  -1  104.19    4.80
   8   7  -1  101.39    5.40
  -8   7   1  103.29    5.60
   7  -7  -1   86.09    4.20
  -7  -7   1   84.09    5.20
   7   7  -1   82.89    5.10
  -7   7   1   88.89    5.20
   6  -7  -1  215.88    7.00
  -6  -7   1  218.68    8.00
   6   7  -1  241.68    9.00
  -6   7   1  212.18    8.70
  -6   7   1  215.88    8.60
  -5  -7   1  130.79    5.90
   5  -7  -1  125.89    4.90
  -5   7   1  135.39    6.30
  -5   7   1  123.59    6.20
   4  -7  -1   37.60    3.00
   4   7  -1   40.70    5.10
  -4   7   1   45.20    4.30
  -4   7   1   44.50    4.60
   3  -7  -1   68.89    3.60
   3   7  -1   71.49    4.70
  -3   7   1   54.29    5.10
  -3   7   1   59.39    4.50
   3   7  -1   61.29    4.50
   2  -7  -1 1822.62   42.00
  -2  -7   1 1871.41   42.40
  -2   7   1 1685.53   42.70
   2   7  -1 1872.31   42.70
  -2   7   1 1864.21   42.80
   2   7  -1 1822.02   42.60
   1  -7  -1  552.04   14.10
   1  -7  -1  568.14   33.40
  -1  -7   1  562.94   14.30
   1   7  -1  564.14   14.20
  -1   7   1  535.75   14.70
   1   7  -1  551.14   14.60
   1   7  -1  527.35   16.10
   0  -7   1 1441.06   58.69
   0  -7  -1 1363.66   61.39
   0  -7  -1 1429.46   33.30
   0  -7   1 1450.55   33.40
   0   7  -1 1426.56   35.60
   0   7  -1 1454.45   34.00
   0   7   1 1439.96   34.00
   1  -7   1 1056.69   24.80
  -1  -7  -1 1037.10   25.00
   1  -7   1 1059.89   46.10
  -1   7  -1 1031.80   25.40
  -1   7  -1 1028.70   26.90
   1   7   1 1040.60   25.60
   2  -7   1   51.79   14.10
  -2  -7  -1   49.40    4.00
   2  -7   1   51.99    3.00
   2   7   1   56.89    5.00
   2   7   1   51.79    4.20
  -2   7  -1   53.49    3.80
  -3  -7  -1  125.39    5.50
   3  -7   1  120.49    4.70
   3   7   1  122.49    6.00
   3   7   1  123.59    6.00
  -4  -7  -1    5.70    2.30
  -4  -7  -1    4.20    2.50
   4   7   1    1.70    3.20
   4   7   1    3.70    2.30
  -4   7  -1    5.20    2.20
  -5  -7  -1   -0.30    2.10
  -5  -7  -1    2.70    2.20
   5  -7   1    1.90    1.40
  -5   7  -1   -0.80    2.30
   5   7   1   -2.10    2.00
  -5   7  -1    0.20    2.20
   6  -7   1   65.49    3.70
  -6  -7  -1   63.89    4.80
  -6  -7  -1   71.19    5.10
   6   7   1   62.29    4.70
   6   7   1   65.59    4.40
  -6   7  -1   59.69    5.50
   7  -7   1   98.19    4.60
  -7  -7  -1  105.89    5.70
  -7  -7  -1  105.09    6.30
   7   7   1   94.59    5.40
  -7   7  -1  100.19    5.60
   7   7   1  104.29    5.40
  -8  -7  -1   13.60    3.30
  -8  -7  -1   16.50    3.20
   8  -7   1   14.70    2.30
   8   7   1   11.80    2.50
  -8   7  -1   14.30    2.70
   8   7   1   12.30    2.50
  -9  -7  -1   22.30    3.60
   9  -7   1   26.80    2.50
  -9   7  -1   35.20    4.20
   9   7   1   23.30    3.10
   9   7   1   25.80    2.90
  10  -7   1    2.50    1.20
 -10  -7  -1    1.80    2.10
  10   7   1    2.00    1.90
  10   7   1    0.50    1.40
 -11  -7  -1   20.20    3.60
  11  -7   1   20.40    2.10
  11   7   1   17.60    2.40
 -11   7  -1   15.50    2.60
  12  -7   1  204.38    5.80
  12   7   1  198.48    6.00
 -12   7  -1  207.28    6.00
 -11  -8   1    8.80    1.60
  11  -8  -1    8.50    1.40
  11   8  -1    6.60    1.40
  11   8  -1    3.20    2.10
 -11   8   1   12.50    2.30
 -10  -8   1  413.66   11.80
  10  -8  -1  419.56   11.10
  10   8  -1  424.96   11.30
 -10   8   1  436.46   11.70
  10   8  -1  437.16   11.70
   9  -8  -1    2.70    1.30
   9   8  -1   -1.00    1.50
   8  -8  -1  149.39    5.30
  -8  -8   1  151.38    6.00
   8   8  -1  147.89    5.80
   8   8  -1  154.68    6.40
  -8   8   1  159.48    6.70
  -7  -8   1  108.89    5.90
   7  -8  -1  106.49    4.90
   7   8  -1  107.69    5.60
  -7   8   1  115.59    6.10
  -6  -8   1    0.80    2.20
   6  -8  -1    1.80    1.60
  -6   8   1   -0.80    3.00
  -6   8   1    8.20    2.60
   6   8  -1   -2.00    2.00
  -5  -8   1  199.38    7.50
   5  -8  -1  185.48    6.50
  -5   8   1  200.18    8.00
   5   8  -1  185.58    7.30
  -5   8   1  197.98    7.90
  -4  -8   1  253.07    8.60
   4  -8  -1  259.37    7.90
   4   8  -1  252.37    9.10
  -4   8   1  265.97    9.00
  -4   8   1  256.97    9.30
  -3  -8   1  159.08    6.10
   3  -8  -1  136.29    5.30
   3   8  -1  137.29    6.30
  -3   8   1  137.69    6.30
  -3   8   1  140.09    6.70
  -2  -8   1   23.70    3.20
   2  -8  -1   22.60    2.90
  -2   8   1   20.00    2.90
   2   8  -1   19.70    2.90
   1  -8  -1   92.79    4.50
  -1  -8   1   89.79    4.60
  -1   8   1  101.09    5.60
  -1   8   1   95.19    5.20
   1   8  -1   96.69    5.00
   0  -8   1  545.05   14.30
   0  -8  -1  550.74   14.30
   0   8  -1  545.55   14.90
   0   8   1  558.04   15.30
   0   8   1  539.05   15.00
   0   8   1  531.35   15.20
   1  -8   1   79.69    4.10
  -1  -8  -1   77.19    4.60
  -1   8  -1   78.49    4.60
  -1   8  -1   89.69    5.30
   1   8   1   83.29    4.90
   1   8   1   79.39    5.50
   2  -8   1  357.56   10.30
  -2  -8  -1  379.76   10.90
   2   8   1  363.56   11.20
  -2   8  -1  391.26   11.50
   2   8   1  369.86   11.20
  -2   8  -1  377.36   11.10
  -3  -8  -1    2.70    2.00
   3  -8   1   -0.60    1.40
   3   8   1    0.80    2.30
  -3   8  -1    3.10    2.10
   3   8   1   -2.80    2.30
  -3   8  -1    2.70    2.40
  -4  -8  -1  354.96   10.70
  -4  -8  -1  361.56   10.50
   4  -8   1  343.77    9.90
  -4   8  -1  340.97   10.60
  -4   8  -1  339.37   11.00
   4   8   1  331.87   10.80
   4   8   1  336.77   11.00
   4   8   1  347.57   10.50
  -5  -8  -1   92.79    5.40
   5  -8   1   90.79    4.40
  -5  -8  -1   97.49    5.60
  -5   8  -1   92.79    5.60
   5   8   1   90.59    5.20
  -5   8  -1   95.09    5.80
   5   8   1   93.09    5.20
   6  -8   1  216.38    7.30
  -6  -8  -1  223.98    8.30
   6   8   1  216.68    8.00
  -6   8  -1  230.38    8.60
   6   8   1  217.28    7.80
  -6   8  -1  207.68    8.50
   7  -8   1  137.69    7.50
   7   8   1  128.69    8.00
  -7   8  -1  138.89    6.70
   7   8   1  121.89    6.00
   8  -8   1  407.16   11.10
  -8  -8  -1  396.76   12.70
  -8   8  -1  420.86   12.30
   8   8   1  402.26   11.90
   8   8   1  396.46   11.50
   9  -8   1    3.20    1.20
  -9  -8  -1    2.70    2.10
   9   8   1    1.90    1.60
   9   8   1    0.50    1.50
  10  -8   1    2.80    1.20
 -10  -8  -1    4.00    2.00
 -10   8  -1    0.90    1.40
  10   8   1   -0.90    1.40
  10   8   1   -0.80    1.60
  11  -8   1   56.19    2.80
 -11   8  -1   61.09    2.90
  11   8   1   52.69    3.00
 -10  -9   1  152.98    5.30
  10  -9  -1  148.79    4.90
 -10   9   1  146.99    5.10
  10   9  -1  153.08    5.00
  10   9  -1  153.08    5.10
  -9  -9   1   62.29    3.70
   9  -9  -1   59.29    3.10
  -9   9   1   73.69    4.00
   9   9  -1   60.89    3.30
   9   9  -1   62.89    3.40
   8  -9  -1  417.86   11.40
  -8  -9   1  463.45   15.60
  -8  -9   1  428.16   12.10
   8   9  -1  448.26   12.00
  -8   9   1  401.36   11.00
   7  -9  -1   -1.50    1.30
  -7  -9   1   -0.30    1.80
   7   9  -1    3.70    1.70
   7   9  -1    0.40    2.00
   6  -9  -1    0.60    1.40
  -6  -9   1    0.40    1.90
  -6   9   1    0.30    2.50
   6   9  -1    1.00    2.00
   5  -9  -1  298.07    9.10
  -5  -9   1  299.77   10.00
  -5   9   1  310.97   10.50
  -5   9   1  307.97   10.20
   5   9  -1  298.27    9.80
   5   9  -1  297.17   11.20
   4  -9  -1  220.28    7.20
   4   9  -1  217.38    8.50
   4   9  -1  211.88    7.90
  -4   9   1  217.68    8.60
  -4   9   1  225.28    8.50
  -3  -9   1   73.99    4.60
   3  -9  -1   77.69    4.30
  -3   9   1   75.69    5.30
   3   9  -1   71.89    4.80
   3   9  -1   75.69    5.30
  -3   9   1   59.49    5.30
  -2  -9   1  567.64   15.40
   2  -9  -1  558.24   14.90
   2   9  -1  567.34   15.90
   2   9  -1  573.44   17.20
  -2   9   1  578.24   16.10
  -2   9   1  569.74   15.90
  -1  -9   1  164.28    6.40
   1  -9  -1  157.88    6.10
   1   9  -1  160.88    6.70
  -1   9   1  172.08    7.10
   1   9  -1  157.18    6.80
   0  -9   1   26.00    3.30
   0  -9  -1   21.50    3.50
   0   9  -1   31.70    5.20
   0   9   1   24.60    4.00
   0   9   1   24.10    3.50
   0   9  -1   30.00    3.90
   1  -9   1   37.80    3.50
  -1  -9  -1   43.90    4.10
   1   9   1   41.90    4.30
  -1   9  -1   40.30    4.20
   1   9   1   36.40    4.70
  -2  -9  -1  295.67    9.60
   2  -9   1  309.77    9.30
  -2   9  -1  310.77   10.20
   2   9   1  294.57    9.70
  -2   9  -1  310.27   10.10
   2   9   1  304.87   10.20
  -3  -9  -1  552.14   15.00
  -3  -9  -1  480.75   15.30
   3  -9   1  552.54   14.50
  -3   9  -1  552.14   15.30
   3   9   1  556.54   15.50
  -3   9  -1  543.95   15.40
   3   9   1  558.44   15.10
  -4  -9  -1  194.28    7.60
   4  -9   1  180.48    6.50
  -4  -9  -1  190.68    8.70
   4   9   1  169.38    8.00
  -4   9  -1  195.38    7.70
   4   9   1  182.78    7.30
   4   9   1  179.48    7.30
  -4   9  -1  177.08    7.60
  -5  -9  -1  137.89    6.70
   5  -9   1  141.79    5.70
  -5   9  -1  142.39    6.70
  -5   9  -1  147.39    7.10
   5   9   1  147.99    6.60
   5   9   1  146.09    6.50
   5   9   1  138.89    9.80
   6  -9   1   66.09    3.40
  -6  -9  -1   55.49    4.20
  -6   9  -1   62.19    4.60
   6   9   1   67.59    4.60
   6   9   1   64.19    3.80
  -6   9  -1   55.59    5.10
  -7  -9  -1  113.29    5.30
   7  -9   1  115.49    4.50
   7   9   1  118.19    4.90
   7   9   1  116.59    5.80
  -7   9  -1  117.29    6.10
   8  -9   1    0.90    1.20
  -8  -9  -1    0.80    2.10
   8   9   1   -3.30    1.60
  -8   9  -1   -0.10    1.60
   8   9   1   -1.90    1.50
  -9  -9  -1   -0.80    1.90
   9  -9   1   -0.10    1.20
   9   9   1    1.90    1.40
  -9   9  -1   -2.50    1.30
   9   9   1    0.20    1.40
  10  -9   1    4.50    1.30
  10   9   1    6.00    1.50
 -10   9  -1    6.60    1.30
  10   9   1    8.00    1.50
   9 -10  -1    0.60    1.60
  -9 -10   1    1.30    1.40
   9  10  -1    0.90    1.20
   9  10  -1    1.00    1.60
  -9  10   1   -1.60    1.10
  -8 -10   1  425.06   11.60
  -8 -10   1  436.06   12.10
   8 -10  -1  429.16   11.30
  -8  10   1  426.06   11.60
   8  10  -1  442.46   11.60
   8  10  -1  429.16   11.40
  -8  10   1  421.16   10.70
   7 -10  -1  111.39    4.30
  -7 -10   1  104.39    4.80
  -7  10   1  111.69    4.00
  -7  10   1   98.29    4.60
   7  10  -1  112.09    4.50
   7  10  -1  108.79    4.50
  -6 -10   1  791.02   20.30
   6 -10  -1  789.62   19.60
  -6  10   1  776.02   20.30
   6  10  -1  790.32   19.90
   6  10  -1  834.92   20.60
  -6  10   1  804.52   20.70
  -5 -10   1  108.39    5.00
   5 -10  -1  100.99    4.40
  -5  10   1  114.69    5.30
  -5  10   1   93.09    5.60
   5  10  -1  113.69    5.50
   5  10  -1  105.79    4.90
   4 -10  -1  217.28    6.90
  -4 -10   1  207.48    7.40
  -4  10   1  213.68    7.60
   4  10  -1  207.88    7.70
  -4  10   1  195.78    7.80
   4  10  -1  216.38    7.70
   3 -10  -1   77.09    4.60
  -3 -10   1   76.29    5.20
  -3  10   1   65.19    5.00
   3  10  -1   85.49    5.80
   3  10  -1   72.29    5.00
  -3  10   1   83.19    5.70
   2 -10  -1 1863.51   44.10
  -2 -10   1 1866.51   44.50
  -2  10   1 1919.41   45.40
  -2  10   1 1938.31   45.10
   2  10  -1 1834.92   44.40
   2  10  -1 1904.41   45.20
   1 -10  -1  175.68    6.80
  -1 -10   1  167.38    6.80
  -1  10   1  176.28    7.70
   1  10  -1  175.78    7.40
   1  10  -1  171.18    7.00
   0 -10  -1   86.19    5.20
   0 -10   1   99.69    5.20
   0  10   1   91.99    5.90
   0  10  -1   94.69    6.00
   0  10  -1   93.39    5.70
   0  10   1   88.49    6.30
  -1 -10  -1  124.49    6.10
   1 -10   1  130.69    5.90
   1  10   1  129.09    6.20
  -1  10  -1  139.99    6.70
   1  10   1  136.59    6.70
  -2 -10  -1    6.50    2.60
   2 -10   1    3.00    2.00
   2  10   1    6.50    2.60
   2  10   1    5.80    2.40
  -2  10  -1    7.10    2.50
   3 -10   1   96.79    5.20
  -3  10  -1   90.89    5.50
   3  10   1   98.39    5.40
   3  10   1   99.39    6.90
  -3  10  -1  108.29    6.10
   4 -10   1   24.70    2.50
  -4 -10  -1   20.70    2.50
   4  10   1   24.80    3.80
  -4  10  -1   18.40    2.90
  -4  10  -1   22.50    3.40
   4  10   1   26.50    4.10
  -5 -10  -1   74.49    4.60
   5 -10   1   79.79    3.80
  -5  10  -1   78.79    4.40
   5  10   1   88.19    4.90
  -5  10  -1   69.59    4.90
   5  10   1   73.19    4.40
  -6 -10  -1    8.70    2.30
   6 -10   1    7.80    1.40
   6  10   1    7.90    2.40
  -6  10  -1    3.00    2.20
  -6  10  -1    8.30    2.50
  -7 -10  -1   10.90    2.40
   7 -10   1    9.50    1.50
  -7  10  -1    2.20    1.50
   7  10   1    5.50    1.90
   7  10   1    5.20    1.50
   8 -10   1   46.70    2.60
  -8 -10  -1   40.00    3.30
  -8  10  -1   37.90    2.70
   8  10   1   43.00    2.70
   8  10   1   41.20    3.20
  -9 -10  -1   30.30    3.40
   9 -10   1   30.80    2.50
   9  10   1   26.20    2.20
  -9  10  -1   31.20    2.30
   9  10   1   20.30    3.00
  -8 -11   1    3.30    1.40
  -8  11   1    2.10    1.10
   8  11  -1    4.50    1.10
   7 -11  -1    0.10    1.80
  -7 -11   1   -4.20    2.00
  -7  11   1   -1.20    1.10
  -7  11   1    0.60    1.20
   6 -11  -1   97.19    4.20
  -6 -11   1  104.69    4.60
  -6  11   1   90.79    4.20
   6  11  -1  109.69    4.20
  -6  11   1  102.59    3.60
  -5 -11   1    9.70    2.00
   5 -11  -1    8.70    1.70
  -5  11   1    7.40    2.10
   5  11  -1    8.60    1.60
  -4 -11   1  643.54   16.90
   4 -11  -1  645.74   16.50
  -4  11   1  655.83   17.30
   4  11  -1  632.14   17.10
   4  11  -1  681.03   17.40
  -3 -11   1  312.77    9.40
   3 -11  -1  298.07    9.00
  -3  11   1  312.17    9.80
   3  11  -1  301.77    9.70
   3  11  -1  315.67    9.60
  -2 -11   1  150.78    5.80
   2 -11  -1  143.69    5.70
  -2  11   1  149.09    6.10
   2  11  -1  149.99    6.20
   2  11  -1  154.68    6.40
   1 -11  -1    0.40    2.00
  -1 -11   1   -0.80    1.70
  -1  11   1   -0.90    1.80
   1  11  -1    1.90    2.00
   1  11  -1   -0.70    2.30
   0 -11   1  626.64   16.40
   0 -11  -1  619.24   16.30
   0  11  -1  632.44   17.10
   0  11   1  636.94   17.70
   0  11   1  625.54   17.10
   1 -11   1  134.29    5.40
  -1 -11  -1  134.29    5.60
  -1  11  -1  138.19    5.90
   1  11   1  136.89    6.30
   1  11   1  136.89    5.90
  -2 -11  -1  583.44   15.70
   2 -11   1  594.54   15.60
   2  11   1  599.34   16.00
   2  11   1  592.44   16.30
  -2  11  -1  627.24   16.50
   3 -11   1   16.40    2.60
  -3 -11  -1   12.80    2.40
   3  11   1   14.40    2.50
  -3  11  -1    8.30    2.00
   3  11   1   11.10    2.30
   4 -11   1    8.60    1.60
  -4 -11  -1   10.00    2.40
   4  11   1   10.70    2.80
  -4  11  -1   11.40    2.00
  -5 -11  -1   41.70    4.50
   5 -11   1   40.70    2.80
  -5  11  -1   41.30    3.60
   5  11   1   43.00    3.00
   6 -11   1  109.19    4.10
   6  11   1  110.39    4.20
  -6  11  -1   93.79    5.00
   7 -11   1   29.40    2.40
  -7 -11  -1   23.40    3.00
   7  11   1   23.20    2.10
  -7  11  -1   24.70    2.30
   8 -11   1   99.09    3.80
  -8 -11  -1   91.89    4.00
   8  11   1  103.99    3.60
  -6 -12   1    6.50    2.60
   6  12  -1    7.80    1.10
   5 -12  -1   -1.20    2.40
  -5 -12   1   -2.20    2.10
   5  12  -1    1.30    1.20
  -5  12   1    5.00    2.10
  -5  12   1    0.50    1.00
   4 -12  -1   17.50    2.50
  -4 -12   1   18.20    3.40
  -4  12   1   19.20    2.80
   4  12  -1   19.80    2.20
   4  12  -1   13.30    3.40
  -3 -12   1   -2.00    1.90
   3  12  -1    4.70    2.30
  -3  12   1   -1.80    1.70
   3  12  -1    1.70    1.50
  -2 -12   1   26.00    3.30
   2 -12  -1   25.30    3.70
  -2  12   1   27.90    3.00
   2  12  -1   23.20    3.20
   2  12  -1   21.20    2.80
   1 -12  -1   18.70    2.40
  -1  12   1   18.10    2.90
   1  12  -1   17.50    2.90
   1  12  -1   17.40    2.20
   0 -12  -1   21.60    2.70
   0 -12   1   21.40    3.00
   0  12  -1   24.30    2.90
   0  12   1   25.40    3.10
  -1 -12  -1    0.80    2.70
   1 -12   1    3.80    1.70
   1  12   1    4.00    2.10
  -1  12  -1    3.10    1.70
   1  12   1    7.40    2.00
   2 -12   1   89.09    4.10
  -2  12  -1   83.49    4.30
   2  12   1   95.89    4.70
   2  12   1   90.39    3.90
   3 -12   1   80.69    3.80
   3  12   1   85.39    3.80
   3  12   1   81.79    3.60
  -3  12  -1   84.69    4.10
   3  12   1   87.79    4.70
  -4  12  -1   11.80    1.90
   4  12   1   12.50    1.50
   5 -12   1   46.40    3.10
   5  12   1   57.29    2.70
  -5  12  -1   52.89    3.60
   6 -12   1  141.89    4.90
  -6 -12  -1  150.88    5.00
   6  12   1  143.69    4.60
  -6  12  -1  141.29    4.90
   4  13  -1    1.10    1.30
  -4  13   1    0.20    0.80
  -3  13   1    0.60    1.70
   3  13  -1   -1.70    1.60
  -2 -13   1   96.39    4.70
  -2  13   1   98.99    3.30
  -2  13   1   94.89    4.10
   2  13  -1   95.79    4.50
  -1 -13   1   14.20    2.30
   1  13  -1   12.30    1.90
  -1  13   1   15.40    1.50
  -1  13   1   16.30    1.90
   0 -13   1   90.79    4.30
   0  13  -1   80.89    3.90
   0  13   1   88.89    4.10
   0  13   1   89.59    3.10
   1 -13   1   22.20    3.40
   1  13   1   19.20    1.90
   1  13   1   18.50    2.20
  -1  13  -1   24.40    2.70
   2 -13   1   76.09    3.90
   2  13   1   73.09    3.00
   2  13   1   78.19    4.20
  -2  13  -1   75.59    3.60
   3 -13   1    2.40    2.10
   3  13   1   -0.40    1.50
  -3  13  -1   -0.10    1.60
 -14   0   2    1.20    1.00
 -14   0   2    1.90    1.30
 -13   0   2   -1.10    1.30
 -13   0   2   -0.10    1.50
 -12   0   2 1207.58   29.60
 -12   0   2 1176.08   28.70
 -12   0   2 1206.08   29.00
 -11   0   2    5.40    2.10
 -11   0   2    1.60    2.20
 -11   0   2    0.70    2.40
 -10   0   2 1636.04   39.90
 -10   0   2 1668.23   39.30
 -10   0   2 1651.83   39.30
  -9   0   2    0.60    2.20
  -9   0   2    2.50    2.10
  -9   0   2    2.00    2.20
   9   0  -2    8.50    3.10
   8   0  -2   -0.90    2.60
  -8   0   2    2.00    2.60
  -8   0   2   -0.40    2.90
  -8   0   2    2.00    1.80
   7   0  -2    3.30    1.50
  -7   0   2   -0.70    1.70
   6   0  -2  546.95   14.00
  -4   0   2  720.53   17.10
   4   0  -2  725.13   17.10
   4   0  -2  728.83   16.70
  -3   0   2    0.50    0.50
   3   0  -2    0.30    0.30
   3   0  -2    0.60    0.30
   1   0  -2    0.60    0.20
   1   0  -2    0.70    0.60
   0   0  -2 1159.88   29.30
   1   0   2    0.10    1.20
  -1   0  -2    0.60    0.30
   3   0   2    0.20    2.60
   3   0   2    1.80    0.50
   4   0   2  422.96   23.80
  -4   0  -2  414.76   10.80
  -4   0  -2  427.86   10.20
   4   0   2  403.06   10.50
   5   0   2    1.80    0.80
  -5   0  -2   -1.00    1.70
  -5   0  -2    0.20    0.70
   6   0   2 3328.07   75.59
  -6   0  -2 3368.36   75.79
   6   0   2 3359.66   76.29
  -7   0  -2    1.10    1.50
   7   0   2   -1.80    1.90
   7   0   2    1.00    1.80
   8   0   2 1024.00   28.00
  -8   0  -2 1161.28   27.20
  -8   0  -2 1159.08   27.20
  -8   0  -2 1088.79   28.10
  -9   0  -2    3.80    2.50
  -9   0  -2    0.80    1.70
   9   0   2    1.60    2.20
  -9   0  -2    1.20    3.60
  10   0   2  840.42   21.30
 -10   0  -2  813.52   21.80
 -10   0  -2  833.52   21.50
 -10   0  -2  844.82   21.20
 -11   0  -2    0.10    3.30
 -11   0  -2    0.40    1.60
  11   0   2   -4.90    2.60
 -11   0  -2    1.30    2.10
 -12   0  -2   78.39    3.80
 -13   0  -2   -0.20    1.20
 -13   0  -2   -1.70    2.20
 -14  -1   2  226.38    6.40
 -14  -1   2  227.78    6.50
 -14   1   2  232.28    6.60
 -14   1   2  223.48    6.40
 -13  -1   2   18.30    2.50
 -13   1   2   15.00    2.20
 -13   1   2   13.20    2.30
 -12  -1   2  686.33   18.20
 -12  -1   2  696.93   17.70
 -12   1   2  658.23   17.30
 -12   1   2  678.83   17.60
 -12   1   2  661.73   18.10
 -11  -1   2   82.39    5.60
 -11  -1   2   88.39    5.40
 -11  -1   2   85.39    4.80
 -11   1   2   86.39    5.00
 -11   1   2   87.69    5.50
  11   1  -2   82.89    6.20
 -11   1   2   86.09    5.10
 -10  -1   2  163.58    7.20
 -10  -1   2  158.28    6.80
 -10  -1   2  159.78    6.50
 -10   1   2  175.18    6.70
  10   1  -2  153.78    7.00
 -10   1   2  161.18    6.60
 -10   1   2  158.88    7.20
  -9  -1   2   10.00    2.70
  -9  -1   2    9.50    2.40
  -9  -1   2    9.40    2.60
  -9   1   2    7.40    2.10
  -9   1   2   15.10    2.80
   9   1  -2    8.70    2.40
  -9   1   2    5.30    2.40
  -8  -1   2   93.49    5.50
  -8  -1   2   91.39    4.90
  -8  -1   2   96.59    6.30
   8  -1  -2   91.59    5.70
  -8   1   2   85.89    5.50
  -8   1   2   93.49    4.60
  -8   1   2   94.39    5.80
  -7  -1   2   62.29    4.60
   7  -1  -2   63.39    3.70
  -7   1   2   66.49    3.90
   7   1  -2   67.29    4.00
  -6  -1   2 2395.96   53.69
  -6  -1   2 2358.86   53.29
   6  -1  -2 2369.06   53.59
   6   1  -2 2380.16   53.99
  -6   1   2 2245.68   53.69
  -5  -1   2   16.30    1.80
  -5  -1   2   13.70    2.40
   5  -1  -2   14.50    1.30
   5   1  -2   13.50    8.70
  -5   1   2   13.10    1.90
   5   1  -2   15.50    1.30
   5   1  -2   12.30    1.60
  -4  -1   2 3647.03   82.49
  -4  -1   2 3681.93   82.69
   4  -1  -2 3580.44   82.19
   4   1  -2 3916.11   97.09
   4   1  -2 3631.24   82.59
   3  -1  -2   91.89    2.50
  -3  -1   2   84.19    3.00
   3  -1  -2   84.79    2.50
  -3   1   2   87.49    2.60
   3   1  -2   90.29    7.20
   3   1  -2   85.39    2.80
   3   1  -2   97.39    2.90
  -1  -1   2    9.60    0.90
   1  -1  -2   11.30    2.00
   1   1  -2   11.10    0.80
  -1   1   2   10.20    2.30
   0  -1   2 1703.33   38.00
   0   1   2 1669.73   42.50
  -1  -1  -2   31.60    1.30
   1   1   2   30.90    1.20
  -1   1  -2   31.50    1.30
  -1   1  -2   32.90    1.30
   2  -1   2  864.61   20.40
  -2  -1  -2  956.20   30.10
  -2  -1  -2  883.41   20.50
   2   1   2  851.31   20.40
  -2   1  -2  895.11   20.40
  -2   1  -2  896.71   20.50
  -3  -1  -2  181.58    5.20
   3  -1   2  181.28    5.00
  -3  -1  -2  189.18    5.20
  -3   1  -2  180.88    4.70
  -3   1  -2  182.28    5.20
   3   1   2  182.78    5.10
   4  -1   2  335.27    8.80
  -4  -1  -2  330.77    9.10
  -4   1  -2  343.47    8.20
  -4   1  -2  342.27    9.10
   4   1   2  344.87    8.90
  -5  -1  -2  763.12   18.20
   5   1   2  770.72   18.60
  -5   1  -2  727.23   18.80
  -6  -1  -2 1280.57   30.10
   6  -1   2 1292.37   30.40
   6   1   2 1278.57   30.60
   6   1   2 1266.87   30.10
  -6   1  -2 1257.47   30.10
  -7  -1  -2 1035.00   24.80
   7  -1   2  996.90   25.40
   7  -1   2  978.60   24.50
   7   1   2 1026.60   26.00
   7   1   2 1034.00   24.70
  -7   1  -2 1039.60   24.80
   8  -1   2  203.58    7.50
  -8  -1  -2  194.88    9.70
  -8  -1  -2  199.28    7.80
  -8  -1  -2  202.68    7.10
   8   1   2  217.08    7.20
  -8   1  -2  202.38    7.40
  -8   1  -2  211.58    7.20
  -8   1  -2  203.58    9.40
  -9  -1  -2   20.60    3.30
   9  -1   2   23.70    3.50
  -9  -1  -2   18.20    4.00
  -9  -1  -2   19.90    2.90
  -9   1  -2   19.90    3.10
   9   1   2   16.10    2.50
  -9   1  -2   16.70    2.80
  -9   1  -2   18.70    3.90
 -10  -1  -2  328.37   11.30
 -10  -1  -2  338.37   10.60
 -10  -1  -2  348.97   10.40
 -10   1  -2  329.77   10.50
 -10   1  -2  332.77   10.30
  10   1   2  334.27   10.40
 -10   1  -2  331.67   11.40
 -11  -1  -2   76.29    6.50
 -11  -1  -2   77.39    4.60
 -11  -1  -2   76.99    4.00
 -11   1  -2   76.59    6.20
  11   1   2   74.39    4.40
 -11   1  -2   76.69    3.90
 -11   1  -2   82.39    4.70
 -12  -1  -2  330.07    9.60
 -12  -1  -2  338.37    9.90
  12   1   2  350.16   10.00
 -12   1  -2  342.97   10.00
 -13  -1  -2    0.00    1.20
 -13  -1  -2   -2.90    1.70
 -13   1  -2    0.40    1.20
 -14  -2   2   27.70    2.00
 -14   2   2   27.60    1.90
 -14   2   2   25.90    2.50
 -13  -2   2   15.20    2.20
 -13  -2   2   12.70    1.70
 -13   2   2   15.40    2.10
 -13   2   2   15.50    2.30
 -12  -2   2   11.30    2.40
 -12  -2   2    8.70    2.50
 -12   2   2    8.80    1.80
  12   2  -2   11.20    2.30
 -12   2   2    8.90    2.30
 -12   2   2    6.00    2.00
 -11  -2   2    4.60    2.40
 -11  -2   2    4.60    2.10
 -11   2   2    7.40    2.20
 -11   2   2    7.50    2.60
 -10  -2   2    2.60    2.10
 -10  -2   2    4.20    2.50
 -10   2   2    9.30    2.60
 -10   2   2    1.30    1.90
  10   2  -2    2.80    2.30
 -10   2   2    6.10    2.40
  -9  -2   2   37.60    4.70
  -9  -2   2   35.20    4.60
  -9  -2   2   31.50    4.20
  -9   2   2   22.60    3.20
  -9   2   2   41.20    4.20
  -9   2   2   28.20    3.40
  -8  -2   2  439.26   12.60
  -8  -2   2  440.96   13.80
  -8  -2   2  465.25   13.00
  -8   2   2  451.75   13.30
  -8   2   2  468.05   12.80
  -8   2   2  463.45   12.80
   7  -2  -2   39.00    3.40
  -7  -2   2   43.80    3.40
  -7  -2   2   40.20    6.20
  -7   2   2   32.80    3.20
   7   2  -2   36.80    3.80
   6  -2  -2   74.19    3.10
  -6  -2   2   75.99    4.00
   6   2  -2   75.69    3.40
   6   2  -2   72.29    3.70
  -6   2   2   71.69    4.00
  -6   2   2   71.19    3.90
   5  -2  -2 3476.75   77.99
  -5  -2   2 3586.14   78.99
  -5   2   2 3482.65   78.09
   5   2  -2 3483.95   78.89
   5   2  -2 3425.36   78.59
  -4  -2   2  103.29    4.00
   4  -2  -2  101.09    9.70
   4  -2  -2  109.99    3.00
   4   2  -2  103.09    3.60
  -4   2   2  105.09    3.20
   4   2  -2  104.39    3.60
   3  -2  -2  164.88   11.00
   3  -2  -2  165.18    4.10
   3  -2  -2  172.98    4.40
  -3  -2   2  161.08    5.10
   3   2  -2  169.68    4.90
   3   2  -2  163.58    4.80
   1   2  -2   11.80    1.00
  -1   2   2   11.20    3.40
   1   2  -2   11.80    2.10
  -1  -2  -2 2500.35   67.79
   3   2   2 3280.47   92.69
   4  -2   2  629.44   15.30
  -4  -2  -2  635.64   15.80
   4   2   2  626.44   15.50
  -4   2  -2  634.94   15.50
  -4   2  -2  626.74   14.50
  -5   2  -2    4.00    1.80
   5   2   2    2.80    1.50
   5   2   2    4.40    1.00
  -5   2  -2    4.90    1.70
  -6  -2  -2 3209.98   71.79
   6  -2   2 3179.28   72.09
  -6   2  -2 3114.29   71.79
   6   2   2 3162.88   71.79
   6   2   2 3167.88   72.49
   7  -2   2  170.98    7.00
  -7  -2  -2  197.38    6.70
  -7   2  -2  193.68    6.60
  -7   2  -2  188.48    7.30
   7   2   2  191.18    6.70
  -8  -2  -2 1052.19   25.40
  -8  -2  -2  999.70   26.60
  -8  -2  -2 1025.60   25.40
   8   2   2 1017.60   25.20
  -8   2  -2 1063.49   25.40
  -8   2  -2 1035.40   25.30
  -8   2  -2  993.30   26.10
  -9  -2  -2 1084.99   26.80
  -9  -2  -2 1059.39   27.60
  -9   2  -2 1113.59   26.80
  -9   2  -2 1092.19   27.00
   9   2   2 1066.69   26.70
  -9   2  -2 1088.39   27.40
 -10  -2  -2  190.38    7.40
 -10  -2  -2  184.68    7.30
 -10  -2  -2  185.18    8.50
  10   2   2  197.58    7.50
 -10   2  -2  184.18    7.20
 -10   2  -2  190.88    8.20
 -10   2  -2  196.18    7.20
 -11  -2  -2   54.19    6.20
 -11  -2  -2   50.59    4.20
 -11  -2  -2   47.50    3.40
 -11   2  -2   53.59    3.40
 -11   2  -2   52.79    4.10
  11   2   2   50.59    3.70
 -11   2  -2   50.09    5.50
 -12  -2  -2   34.90    2.80
 -12  -2  -2   34.40    3.10
  12   2   2   32.10    3.40
 -12   2  -2   36.50    2.90
 -12   2  -2   40.40    2.80
 -13  -2  -2   28.90    3.40
 -13  -2  -2   23.30    2.30
 -13   2  -2   26.00    2.90
 -13   2  -2   25.60    2.00
 -14  -3   2  388.36    9.70
 -14  -3   2  376.16    9.50
 -14   3   2  378.76    9.60
 -14   3   2  384.26    9.70
 -13  -3   2  107.59    4.40
 -13  -3   2  117.19    4.10
  13   3  -2   99.89    4.90
 -13   3   2  105.89    4.30
 -13   3   2  109.69    4.00
 -12   3   2  583.94   15.70
  12   3  -2  575.24   15.20
 -11  -3   2    0.20    2.30
 -11  -3   2    0.40    2.00
 -11   3   2    0.40    2.00
  11   3  -2    0.70    1.80
 -11   3   2    0.40    2.00
 -11   3   2    3.00    1.60
 -10  -3   2   21.50    2.80
 -10  -3   2   18.20    3.10
 -10   3   2   18.90    2.60
 -10   3   2   21.00    3.90
 -10   3   2   13.70    2.30
  10   3  -2   24.30    3.80
  -9  -3   2  119.79    6.00
  -9  -3   2  119.89    6.70
  -9   3   2  121.89    5.90
  -9   3   2  114.69    6.20
  -9   3   2  117.09    5.40
  -8  -3   2  131.59    5.70
  -8  -3   2  126.69    6.30
  -8  -3   2  125.49    6.90
  -8   3   2  136.49    6.50
  -8   3   2  133.99    6.20
  -8   3   2  132.89    5.50
  -7  -3   2    2.10    3.00
  -7  -3   2    1.10    1.70
  -7   3   2   -0.40    2.50
   6  -3  -2   37.30    2.30
   6  -3  -2   29.30    9.90
  -6  -3   2   31.00    3.20
  -6   3   2   38.90    3.10
   6   3  -2   33.30    3.00
   6   3  -2   32.20    3.10
   5  -3  -2  103.19    3.10
  -5  -3   2  106.09    4.80
   5  -3  -2  104.39   12.10
  -5  -3   2   98.89    5.20
   5   3  -2  105.59    4.20
   5   3  -2  103.09    4.10
   4  -3  -2    9.00    5.00
  -4  -3   2    5.10    1.40
   4   3  -2    5.90    4.80
   4   3  -2    8.70    1.50
   4   3  -2    9.10    1.50
   3  -3  -2  103.99    9.60
   3  -3  -2  105.89    3.40
  -3  -3   2  106.09    4.30
   3   3  -2  103.69    3.50
   3   3  -2  103.39    3.80
   2  -3  -2  240.58   13.70
  -2  -3   2  242.68    7.10
   2  -3  -2  244.58    6.50
   2   3  -2  240.28   11.30
   2   3  -2  238.28    6.40
   2   3  -2  236.38    6.80
  -1  -3   2 3668.63   81.89
  -1  -3   2 3544.65   89.39
  -1   3   2 3676.23   94.29
   1   3  -2 3663.83   81.69
  -1  -3  -2   75.69    3.10
   1  -3   2   67.79    5.90
  -1  -3  -2   67.99    2.30
   1   3   2   66.39    7.50
  -1   3  -2   69.99    2.60
   1   3   2   69.89    2.20
   2  -3   2  913.71   31.20
  -2  -3  -2  919.61   21.40
   2  -3   2  915.61   21.70
  -2  -3  -2  922.31   22.10
   2   3   2  946.91   33.50
   2   3   2  890.01   21.30
  -2   3  -2  922.21   21.40
  -2   3  -2  924.01   21.30
  -3  -3  -2 1140.39   27.40
  -3  -3  -2 1213.08   44.80
  -3  -3  -2 1142.29   28.00
   3   3   2 1241.98   44.20
  -3   3  -2 1148.99   27.00
   3   3   2 1139.69   27.30
  -3   3  -2 1207.08   27.30
  -4  -3  -2   67.39    4.00
  -4  -3  -2   68.79    4.10
  -4   3  -2   68.19    3.50
   4   3   2   66.99    3.00
  -4   3  -2   70.09    2.30
  -5  -3  -2   85.79    4.20
  -5  -3  -2   81.29    5.50
  -5  -3  -2   79.19    5.00
   5   3   2   82.09    3.80
  -5   3  -2   94.59    4.10
  -5   3  -2   79.09    4.70
  -6  -3  -2   46.30    4.20
  -6  -3  -2   45.70    3.50
  -6   3  -2   42.40    3.10
   6   3   2   43.30    3.60
   6   3   2   42.20    3.40
  -7  -3  -2   10.60    2.10
  -7   3  -2    4.60    5.10
   7   3   2   13.50    2.10
  -7   3  -2   11.10    2.60
  -7   3  -2    8.20    1.80
  -8  -3  -2 2524.15   60.69
  -8  -3  -2 2565.84   59.69
  -8  -3  -2 2633.14   59.79
  -8   3  -2 2628.34   60.19
  -8   3  -2 2535.75   59.89
   8   3   2 2595.84   59.89
  -8   3  -2 2653.23   59.79
  -9  -3  -2  484.05   16.40
  -9  -3  -2  500.95   13.90
  -9  -3  -2  482.75   13.90
   9   3   2  497.55   13.90
  -9   3  -2  498.15   14.00
  -9   3  -2  502.85   14.60
  -9   3  -2  500.45   13.80
 -10  -3  -2    3.30    2.20
 -10  -3  -2    0.00    3.20
 -10  -3  -2    1.90    2.60
 -10   3  -2    0.90    2.90
 -10   3  -2    1.80    1.70
 -10   3  -2   -0.30    1.90
  10   3   2   -1.10    2.00
 -11  -3  -2  363.26   10.50
 -11  -3  -2  340.97   12.20
 -11  -3  -2  340.77   10.20
 -11   3  -2  367.96   10.60
  11   3   2  356.46   10.40
 -11   3  -2  361.46   11.10
 -11   3  -2  349.87   10.50
 -12  -3  -2   97.59    4.50
 -12  -3  -2   94.49    4.00
  12   3   2   97.69    4.40
 -12   3  -2   99.89    4.20
 -12   3  -2   95.49    4.00
 -13  -3  -2   31.20    3.90
 -13   3  -2   34.10    2.60
  13   3   2   38.10    3.50
 -13  -4   2  166.78    5.20
 -13  -4   2  168.28    5.50
 -13   4   2  167.48    5.10
  13   4  -2  167.98    5.70
 -13   4   2  165.68    5.40
 -12  -4   2    1.10    1.70
 -12  -4   2    0.10    1.60
 -12   4   2    0.70    1.40
  12   4  -2    3.90    1.70
 -12   4   2    1.20    1.40
 -11  -4   2    6.60    2.30
 -11  -4   2    5.90    2.30
 -11   4   2    6.70    2.30
 -11   4   2    7.00    2.10
  11   4  -2    2.10    1.70
 -10  -4   2   13.40    2.80
 -10  -4   2   15.10    2.60
 -10   4   2   11.60    2.40
 -10   4   2   12.00    2.50
  10   4  -2   11.60    2.40
 -10   4   2   12.40    2.20
  -9  -4   2  369.86   11.20
  -9  -4   2  360.26   12.20
  -9   4   2  372.76   11.50
  -9   4   2  372.76   11.00
  -9   4   2  368.06   11.10
  -8  -4   2  375.86   11.30
  -8  -4   2  374.46   12.10
  -8  -4   2  371.66   11.10
   8   4  -2  360.96   11.70
  -8   4   2  372.76   11.50
  -8   4   2  378.46   11.00
  -8   4   2  365.96   10.90
  -7  -4   2  455.35   12.40
  -7  -4   2  424.06   12.80
  -7   4   2  435.06   12.70
  -7   4   2  427.76   12.80
  -7   4   2  446.86   12.20
  -6  -4   2  258.17    7.90
   6  -4  -2  228.98   22.00
   6   4  -2  238.78    8.60
  -6   4   2  255.87    7.70
   6   4  -2  233.18    8.20
  -5  -4   2    7.40    1.90
   5  -4  -2    4.90    4.40
   5   4  -2    5.40    1.30
  -5   4   2    4.30    1.50
   5   4  -2    6.60    8.20
   5   4  -2    3.00    1.30
   4  -4  -2  901.21   20.50
  -4  -4   2  821.02   21.00
   4  -4  -2  907.51   37.80
   4   4  -2  865.61   21.20
   4   4  -2  869.11   21.70
   4   4  -2  860.91   34.00
  -4   4   2  855.81   21.00
   3  -4  -2 1508.85   34.60
   3  -4  -2 1335.07   53.69
  -3  -4   2 1448.66   35.80
  -3  -4   2 1617.14   49.30
   3   4  -2 1502.45   46.10
   3   4  -2 1481.95   35.50
   3   4  -2 1573.44   34.80
  -2  -4   2    1.10    2.30
   2  -4  -2    1.60    1.00
   2  -4  -2    0.20    2.10
   2   4  -2    0.40    2.70
   2   4  -2    0.60    0.70
   2   4  -2    0.90    0.60
  -1  -4   2  206.58   12.40
   1  -4  -2  202.38   13.30
  -1  -4   2  197.08    6.70
   1  -4  -2  205.58    6.40
   1   4  -2  205.48    5.70
  -1   4   2  197.38   15.30
   1   4  -2  230.98    6.40
   1   4  -2  190.18   14.00
   0  -4  -2  125.99    4.80
   0  -4   2  127.59    8.50
   0  -4   2  122.39    4.80
   0  -4  -2  133.09   10.60
   0   4  -2  124.39    4.30
   0   4   2  123.39    3.30
   0   4   2  124.09   12.00
   1  -4   2 2669.13   60.29
   1  -4   2 2679.13   71.19
  -1  -4  -2 2697.03   59.19
  -1  -4  -2 2676.43   60.59
   1   4   2 2552.74   59.09
  -1   4  -2 2558.64   59.99
   1   4   2 2682.63   76.09
  -2  -4  -2 4844.42  107.29
   2  -4   2 4824.62  107.99
  -2  -4  -2 4835.12  108.59
   2  -4   2 4833.62  122.69
   2   4   2 4651.03  107.19
  -2   4  -2 4740.43  107.59
   2   4   2 4841.92  126.29
  -2   4  -2 4916.31  107.19
  -3  -4  -2   12.00    7.70
   3  -4   2    7.60    5.10
   3  -4   2    5.50    1.50
  -3  -4  -2    5.40    1.70
  -3   4  -2    7.30    1.30
  -4  -4  -2  235.98    7.40
   4  -4   2  265.97   18.80
  -4  -4  -2  260.07   21.20
  -4   4  -2  233.48    7.50
  -4   4  -2  235.18    7.50
  -4   4  -2  244.98    6.50
   4   4   2  227.48    7.20
  -5  -4  -2  538.25   14.00
   5  -4   2  542.35   31.10
  -5  -4  -2  534.65   14.30
   5   4   2  533.65   14.40
  -5   4  -2  560.54   14.10
  -6  -4  -2 1033.00   24.90
  -6  -4  -2 1041.10   24.70
  -6   4  -2  985.90   26.50
   6   4   2 1016.00   24.80
  -6   4  -2 1013.00   24.80
  -7  -4  -2  678.83   17.50
  -7  -4  -2  664.93   19.20
   7   4   2  693.23   17.60
  -7   4  -2  685.43   17.50
   7   4   2  643.44   18.00
  -7   4  -2  672.33   18.30
  -7   4  -2  699.73   17.70
  -8  -4  -2    6.00    4.00
  -8  -4  -2    3.90    2.10
  -8   4  -2    5.80    2.40
   8   4   2    0.20    3.50
  -8   4  -2    5.20    1.90
  -8   4  -2    1.10    3.00
   8   4   2    6.90    2.00
  -9  -4  -2   -1.60    3.60
  -9  -4  -2    3.60    2.20
  -9   4  -2    5.20    2.70
   9   4   2   -0.20    1.90
  -9   4  -2    3.80    2.10
  -9   4  -2    3.20    1.70
 -10  -4  -2  955.10   25.00
 -10  -4  -2  961.50   24.20
 -10  -4  -2  979.90   24.30
 -10   4  -2  972.70   24.90
 -10   4  -2 1014.00   24.40
  10   4   2  995.90   24.80
 -10   4  -2  975.10   24.60
 -11  -4  -2  141.09    5.60
 -11  -4  -2  142.89    5.50
  11   4   2  149.69    5.70
 -11   4  -2  151.88    5.90
 -11   4  -2  138.69    5.50
 -11   4  -2  143.99    5.50
 -12  -4  -2    2.30    3.20
 -12  -4  -2   -3.10    3.30
 -12   4  -2    1.60    1.30
 -12   4  -2    3.00    1.20
  12   4   2   -1.30    1.60
  13   4   2    4.70    1.90
 -13  -5   2   27.90    2.90
 -13  -5   2   23.30    2.40
 -13   5   2   24.70    2.10
  13   5  -2   24.50    2.90
 -12  -5   2   11.60    1.80
 -12  -5   2    7.40    1.60
 -12   5   2    8.60    1.50
  12   5  -2    7.60    1.70
 -12   5   2    3.70    1.40
 -11  -5   2    5.50    2.50
 -11   5   2    7.90    2.20
 -11   5   2    8.40    2.30
 -10  -5   2   89.49    5.90
 -10  -5   2   83.29    5.20
 -10   5   2  103.69    5.10
  10   5  -2   90.99    9.80
 -10   5   2   78.09    5.00
  10   5  -2   84.29    4.50
  -9  -5   2  436.66   12.90
  -9  -5   2  434.46   12.40
  -9  -5   2  429.96   13.60
   9   5  -2  412.36   12.70
  -9   5   2  436.96   12.90
  -9   5   2  425.06   12.20
  -8  -5   2   30.60    3.90
  -8  -5   2   33.70    3.90
  -8  -5   2   20.60    5.10
   8   5  -2   33.70    4.90
  -8   5   2   33.80    3.30
  -8   5   2   40.30    4.70
  -7  -5   2    1.30    1.80
  -7  -5   2    3.10    3.50
  -7   5   2    6.30    1.70
  -7   5   2    3.70    2.30
  -7   5   2    7.40    3.40
  -6  -5   2  282.17    9.10
   6   5  -2  254.77   10.10
  -6   5   2  266.77    9.20
  -6   5   2  265.97    8.40
  -5  -5   2  299.07    8.90
   5  -5  -2  294.47   24.30
   5   5  -2  286.17   10.00
  -5   5   2  287.77    9.60
   5   5  -2  284.67    9.30
   4  -5  -2  163.98   16.40
  -4  -5   2  152.38    5.70
   4   5  -2  162.78    6.40
  -4   5   2  162.28    6.50
   4   5  -2  149.88   19.60
   4   5  -2  164.18    5.70
   3  -5  -2  254.27    8.30
   3  -5  -2  258.47   19.00
  -3  -5   2  252.97   18.70
  -3  -5   2  244.98    7.60
   3   5  -2  244.58   18.80
   3   5  -2  253.17    7.50
  -3   5   2  238.88    8.00
   3   5  -2  250.27    8.20
   2  -5  -2  158.98   13.70
  -2  -5   2  159.68    5.90
   2  -5  -2  162.28    6.30
   2   5  -2  162.98   14.60
   2   5  -2  164.48    5.90
   2   5  -2  166.08    5.20
   1  -5  -2  128.99   11.90
  -1  -5   2  107.39   10.80
   1  -5  -2  126.59    5.70
   1   5  -2  127.39    4.10
   1   5  -2  120.59    4.70
   1   5  -2  132.09   13.10
   0  -5  -2   81.29    5.10
   0  -5   2   80.99    5.10
   0  -5  -2   96.19   10.70
   0  -5   2   94.29    8.80
   0   5  -2   88.69    3.20
   0   5   2   93.19    2.60
   1  -5   2 1412.06   34.60
   1  -5   2 1498.35   47.00
  -1   5  -2 1443.36   34.10
   1   5   2 1424.16   32.90
   2  -5   2 1671.53   39.10
   2  -5   2 1593.84   37.50
  -2   5  -2 1578.84   38.00
   2   5   2 1666.23   37.60
  -2   5  -2 1636.74   38.30
  -2   5  -2 1702.03   37.70
  -3  -5  -2    4.90    5.70
   3  -5   2    2.80    2.30
  -3  -5  -2    7.90    3.00
   3  -5   2    4.90    3.80
  -3   5  -2    3.90    1.90
  -3   5  -2   10.10    2.20
  -3   5  -2    5.00    1.10
  -4  -5  -2   29.40    4.20
   4  -5   2   26.10   10.10
  -4  -5  -2   22.30    3.50
  -4  -5  -2   22.20   12.90
  -4   5  -2   27.50    3.20
  -4   5  -2   29.30    3.70
  -4   5  -2   26.30    2.40
   4   5   2   26.50    2.90
   5  -5   2 2109.99   77.69
  -5  -5  -2 2163.88   50.19
  -5  -5  -2 2257.77   50.59
  -5   5  -2 2205.18   50.39
  -5   5  -2 2205.98   50.39
   5   5   2 2158.38   51.19
  -6   5  -2  272.67    9.60
   6   5   2  265.37    9.20
  -6   5  -2  273.97    9.00
   6   5   2  279.57    8.60
  -6   5  -2  278.27    8.60
  -7  -5  -2  826.62   21.20
  -7  -5  -2  818.92   20.90
  -7   5  -2  846.22   21.10
   7   5   2  807.22   21.20
   7   5   2  817.42   21.10
  -7   5  -2  836.42   21.50
  -7   5  -2  851.41   21.00
  -8  -5  -2   16.90    4.20
  -8  -5  -2   20.40    3.80
  -8   5  -2   23.70    3.30
   8   5   2   21.70    3.30
  -8   5  -2   21.80    3.20
   8   5   2   21.80    3.60
  -8   5  -2   29.80    3.90
  -9  -5  -2    1.40    3.40
  -9  -5  -2   -0.90    2.30
  -9   5  -2    1.90    2.00
  -9   5  -2    1.70    1.80
  -9   5  -2    0.30    2.30
   9   5   2    4.70    3.10
   9   5   2    3.10    2.00
 -10  -5  -2    7.60    2.10
 -10  -5  -2    1.30    3.50
 -10   5  -2    2.70    2.00
  10   5   2    5.60    1.60
 -10   5  -2    2.30    2.40
 -10   5  -2    0.90    1.30
 -11  -5  -2   -3.10    2.30
 -11   5  -2    2.30    1.30
 -11   5  -2    3.10    1.80
  11   5   2    0.70    1.50
  12   5   2  148.49    5.30
 -12  -6   2   78.59    3.70
  12   6  -2   79.79    3.80
 -12   6   2   75.09    3.30
 -11  -6   2   47.50    3.50
 -11  -6   2   45.20    3.80
 -11   6   2   46.10    3.10
  11   6  -2   47.10    3.20
 -11   6   2   45.50    3.10
 -10  -6   2    0.80    2.40
 -10  -6   2   -0.80    3.00
 -10   6   2    1.00    1.80
  10   6  -2    0.40    1.50
  10   6  -2   -2.00    2.60
 -10   6   2   -5.10    2.20
  -9  -6   2  342.57   11.70
  -9  -6   2  350.16   10.90
  -9  -6   2  347.97   11.10
  -9   6   2  341.87   10.90
   9   6  -2  347.37   10.70
  -9   6   2  341.87   10.40
  -8  -6   2  422.06   12.80
  -8  -6   2  435.86   12.70
  -8   6   2  421.26   12.60
   8   6  -2  422.56   12.40
  -8   6   2  423.06   12.30
  -7  -6   2 1951.40   45.60
  -7   6   2 1890.51   45.40
  -6  -6   2   22.70    3.50
  -6   6   2   24.30    3.90
  -6   6   2   23.20    4.10
  -5  -6   2    0.10    1.70
  -5   6   2    1.10    2.50
  -5   6   2    3.00    2.60
   4  -6  -2   67.69    3.50
  -4  -6   2   68.19    4.00
   4   6  -2   70.29    4.40
  -4   6   2   68.09    4.70
   4   6  -2   70.39    5.50
   4   6  -2   66.49    5.10
   3  -6  -2  544.55   14.10
  -3  -6   2  586.54   14.70
  -3  -6   2  558.24   33.10
   3  -6  -2  603.04   33.20
  -3   6   2  571.34   15.00
   3   6  -2  549.15   16.00
   3   6  -2  551.14   14.80
   3   6  -2  566.34   15.00
  -2  -6   2 1235.78   29.30
   2  -6  -2 1232.98   29.00
   2  -6  -2 1261.27   49.90
   2   6  -2 1269.37   29.60
   2   6  -2 1322.17   58.69
   2   6  -2 1166.18   29.40
  -2   6   2 1241.18   29.70
   2   6  -2 1213.68   30.90
   1  -6  -2  167.68   15.60
   1  -6  -2  170.18    6.10
  -1  -6   2  161.48    5.50
  -1   6   2  160.28    6.10
   1   6  -2  166.88    6.30
   1   6  -2  156.98   20.50
   1   6  -2  169.18    5.50
   1   6  -2  160.58    5.80
   0  -6   2  388.56   21.60
   0  -6  -2  387.16   26.10
   0   6  -2  362.66   10.40
   0   6  -2  366.36   11.10
   0   6  -2  375.86    9.90
  -1  -6  -2   57.39    4.80
   1  -6   2   53.49    9.40
   1  -6   2   55.89    3.00
   1   6   2   53.29    4.00
  -1   6  -2   55.99    3.50
  -1   6  -2   52.29    3.60
   1   6   2   55.59    2.50
  -2  -6  -2    0.30    6.80
  -2  -6  -2    4.90    2.40
   2  -6   2    4.40    1.30
   2  -6   2    1.60    4.60
   2   6   2    3.50    1.30
   2   6   2    2.40    2.00
  -2   6  -2    8.30    1.80
   3  -6   2  494.55   12.60
   3  -6   2  501.75   29.10
  -3  -6  -2  486.15   13.30
  -3   6  -2  500.85   13.60
  -3   6  -2  499.15   13.30
   3   6   2  497.35   13.70
   3   6   2  488.35   13.10
   4  -6   2  236.38    7.30
  -4  -6  -2  242.88    8.10
   4  -6   2  232.68   22.70
  -4  -6  -2  235.78    8.10
   4   6   2  238.58    8.90
  -4   6  -2  254.27    7.80
  -4   6  -2  245.08    7.90
  -4   6  -2  266.07   11.20
   4   6   2  226.28    8.30
   4   6   2  230.98    8.30
   5   6   2  260.37    8.00
   5   6   2  217.38    8.00
  -5   6  -2  231.68    7.60
  -5   6  -2  222.58    8.60
  -5   6  -2  230.38    8.10
  -6  -6  -2  441.46   12.30
  -6  -6  -2  430.66   12.40
   6   6   2  418.26   12.50
  -6   6  -2  423.86   12.70
  -6   6  -2  431.56   12.30
  -6   6  -2  445.56   12.90
   6   6   2  439.56   12.40
  -7  -6  -2  462.15   13.00
  -7  -6  -2  475.65   13.30
  -7   6  -2  475.05   13.20
  -7   6  -2  454.85   15.30
   7   6   2  447.46   13.20
   7   6   2  464.15   13.30
  -8  -6  -2  371.76   12.70
  -8  -6  -2  389.66   11.50
  -8   6  -2  382.96   11.70
  -8   6  -2  385.06   11.50
   8   6   2  383.76   11.70
   8   6   2  386.16   11.70
  -9  -6  -2  208.38    8.90
  -9  -6  -2  202.78    7.10
  -9   6  -2  210.58    7.80
   9   6   2  210.18    8.00
  -9   6  -2  209.28    7.20
   9   6   2  215.48    7.30
 -10  -6  -2  209.78    7.60
  10   6   2  195.98    6.80
 -10   6  -2  185.08    6.70
  10   6   2  196.58    6.80
  11  -6   2   -0.20    1.20
  11   6   2    1.80    1.40
  12  -6   2  150.18    4.70
  12   6   2  146.09    5.00
 -12  -7   2   45.90    2.80
  12  -7  -2   41.70    2.70
  12   7  -2   47.40    2.90
 -11  -7   2  100.49    4.40
  11  -7  -2   99.09    3.90
  11   7  -2  102.79    4.30
 -11   7   2  102.79    4.20
  11   7  -2   96.59    6.10
  10  -7  -2    7.10    1.40
  10   7  -2    6.90    1.50
 -10   7   2   10.80    3.80
  10   7  -2    7.90    1.90
   9  -7  -2  129.99    4.90
  -9  -7   2  138.99    5.60
  -9  -7   2  138.09    7.10
  -9   7   2  131.99    6.00
   9   7  -2  149.09    6.30
  -8  -7   2  153.08    6.80
   8  -7  -2  146.99    5.80
   8   7  -2  148.79    6.50
  -8   7   2  153.38    6.50
   7  -7  -2   14.50    2.10
  -7  -7   2   20.20    3.00
  -7   7   2   11.30    2.30
   7   7  -2   14.70    2.50
   6  -7  -2   90.39    4.30
  -6  -7   2   95.79    5.30
  -6   7   2   89.19    6.40
  -5  -7   2  403.56   11.70
   5  -7  -2  383.86   10.80
  -5   7   2  413.76   11.90
  -5   7   2  384.66   11.90
  -4  -7   2  131.89    5.70
   4  -7  -2  142.39    5.30
  -4   7   2  148.09    6.40
   4   7  -2  140.29    6.70
  -4   7   2  139.79    6.40
  -3  -7   2  431.46   11.80
   3  -7  -2  435.86   11.30
   3   7  -2  431.06   12.10
  -3   7   2  421.06   12.30
   3   7  -2  397.66   12.40
  -2  -7   2   63.59    3.80
   2  -7  -2   66.29    3.70
   2   7  -2   60.39    4.20
   2   7  -2   69.29    4.10
  -2   7   2   65.29    4.30
   1  -7  -2 1194.78   28.80
  -1  -7   2 1170.88   29.00
   1  -7  -2 1309.97   69.69
  -1   7   2 1194.18   29.60
   1   7  -2 1194.48   29.30
   1   7  -2 1320.57   34.60
   1   7  -2 1188.68   29.30
   0  -7  -2   98.99   19.50
   0  -7   2  115.39   16.50
   0  -7   2  119.89    4.70
   0  -7  -2  121.69    5.20
   0   7  -2  124.89    5.20
   0   7   2  127.29    5.50
   0   7  -2  115.49    6.10
   1  -7   2  697.13   35.20
  -1  -7  -2  712.93   17.70
   1   7   2  710.33   18.30
  -1   7  -2  692.23   19.20
  -1   7  -2  709.93   18.70
  -1   7  -2  692.63   17.90
   2  -7   2    7.40    7.90
  -2  -7  -2    8.20    2.50
   2   7   2    8.40    2.70
  -2   7  -2    9.10    2.50
   2   7   2   10.60    2.50
  -2   7  -2   12.70    2.90
   2   7   2    6.80    2.90
   3  -7   2  879.01   21.40
  -3  -7  -2  891.71   22.00
   3   7   2  863.21   22.20
   3   7   2  900.31   24.30
   3   7   2  918.01   21.90
  -3   7  -2  833.32   22.30
  -3   7  -2  892.71   22.10
  -4  -7  -2  570.94   15.00
  -4  -7  -2  546.35   14.90
   4  -7   2  558.74   14.30
  -4   7  -2  566.14   15.00
   4   7   2  550.14   14.70
   4   7   2  536.25   15.00
   4   7   2  553.04   15.50
  -4   7  -2  534.25   15.30
  -5  -7  -2  733.03   19.10
  -5  -7  -2  754.02   18.90
   5  -7   2  727.63   18.40
  -5   7  -2  708.73   19.20
   5   7   2  736.73   19.30
   5   7   2  760.32   19.10
  -5   7  -2  735.43   19.10
   6  -7   2 1596.84   37.90
  -6  -7  -2 1658.43   38.30
  -6  -7  -2 1628.54   38.60
  -6   7  -2 1567.44   38.60
   6   7   2 1622.14   38.70
   6   7   2 1623.34   38.60
  -6   7  -2 1628.84   38.60
  -7  -7  -2  221.68    8.10
  -7  -7  -2  230.18    8.40
   7  -7   2  215.38    7.30
   7   7   2  232.48    8.20
  -7   7  -2  220.58    8.20
   7   7   2  226.18    8.30
  -8  -7  -2  167.78    6.30
   8  -7   2  186.78    6.60
  -8  -7  -2  172.08    8.30
   8   7   2  175.28    7.00
   8   7   2  169.48    6.60
  -8   7  -2  158.28    6.90
   9  -7   2    8.30    1.60
   9   7   2   13.20    2.70
   9   7   2    8.70    1.70
  -9   7  -2   16.40    3.00
  10  -7   2    1.40    1.20
 -10  -7  -2    1.80    2.80
  10   7   2    5.00    1.90
 -10   7  -2    0.40    1.70
  10   7   2    0.90    1.40
  11  -7   2   69.49    3.50
  11   7   2   74.79    4.20
 -11  -8   2  150.98    5.20
  11  -8  -2  147.19    4.90
  11   8  -2  147.89    5.20
  11   8  -2  146.89    5.10
 -11   8   2  171.98    5.40
 -10  -8   2  230.28    7.70
  10  -8  -2  234.08    7.00
 -10   8   2  259.67    7.60
  10   8  -2  235.58    7.50
  10   8  -2  228.38    7.10
   9  -8  -2  164.78    5.60
  -9  -8   2  164.78    6.20
  -9  -8   2  166.68    8.10
  -9   8   2  179.48    6.90
   9   8  -2  160.68    6.00
  -8  -8   2   43.90    3.50
   8  -8  -2   37.10    2.80
  -8   8   2   54.09    4.60
  -8   8   2   39.70    4.50
   8   8  -2   45.30    4.10
  -7  -8   2  465.75   13.40
   7  -8  -2  438.36   12.10
   7   8  -2  429.36   12.80
  -7   8   2  443.66   12.30
  -7   8   2  439.96   13.00
  -6  -8   2    2.20    2.10
   6  -8  -2    0.80    1.70
  -6   8   2    5.00    2.40
  -6   8   2    1.10    3.10
   6   8  -2    3.20    2.00
   5  -8  -2   70.99    4.10
  -5  -8   2   74.09    4.80
  -5   8   2   79.39    5.40
  -5   8   2   72.29    5.50
   5   8  -2   79.59    7.50
  -4  -8   2  182.48    6.90
   4  -8  -2  183.28    6.30
  -4   8   2  178.48    7.40
   4   8  -2  172.78    7.40
  -4   8   2  188.58    7.60
  -3  -8   2 2198.98   50.99
   3  -8  -2 2149.28   50.29
  -3   8   2 2199.48   51.29
  -3   8   2 2221.68   51.59
   3   8  -2 2187.48   51.09
   2  -8  -2  324.17    9.60
  -2  -8   2  336.87   10.00
   2   8  -2  324.87   10.20
  -2   8   2  336.87   10.60
  -2   8   2  344.47   10.60
  -1  -8   2   34.60    3.30
   1  -8  -2   33.60    3.60
  -1   8   2   37.40    4.70
  -1   8   2   28.70    3.90
   1   8  -2   34.40    3.60
   0  -8   2   82.19    4.20
   0  -8  -2   76.39    4.70
   0   8  -2   83.99    4.60
   0   8   2   82.69    5.40
   0   8   2   76.49    4.90
   0   8   2   76.29    6.20
   1  -8   2  473.55   12.70
  -1  -8  -2  466.15   13.00
  -1   8  -2  484.35   13.70
  -1   8  -2  481.35   13.30
   1   8   2  475.75   13.60
   1   8   2  460.55   13.50
  -2  -8  -2   71.69    4.90
   2  -8   2   71.19    3.80
  -2   8  -2   78.39    5.20
   2   8   2   65.59    5.00
   2   8   2   71.79    4.80
  -2   8  -2   67.29    4.40
   3  -8   2    1.30    1.50
  -3  -8  -2    3.80    2.60
   3   8   2    0.10    2.30
   3   8   2    0.00    2.00
   3   8   2    2.30    2.60
  -3   8  -2    9.40    2.40
  -3   8  -2    4.30    2.40
  -4  -8  -2  403.56   11.60
  -4  -8  -2  399.56   11.90
   4  -8   2  390.76   11.10
   4   8   2  391.16   13.40
   4   8   2  407.06   11.60
  -4   8  -2  395.36   11.90
   4   8   2  394.36   12.20
  -5  -8  -2  259.47    8.50
   5  -8   2  255.07    8.00
  -5  -8  -2  250.97    8.90
   5   8   2  250.57    8.50
  -5   8  -2  248.88    8.80
   5   8   2  249.48    8.80
  -5   8  -2  236.98    8.80
   6  -8   2 1324.47   31.10
  -6  -8  -2 1296.57   31.20
  -6  -8  -2 1313.57   31.70
  -6   8  -2 1285.97   31.70
   6   8   2 1289.37   31.70
  -6   8  -2 1244.88   31.60
   6   8   2 1326.27   31.60
  -7  -8  -2  363.36   10.70
  -7  -8  -2  354.16   10.40
   7  -8   2  378.46   10.30
   7   8   2  367.16   10.60
  -7   8  -2  357.76   11.30
   7   8   2  362.16   11.20
  -8  -8  -2   90.19    6.60
   8  -8   2   93.19    3.90
   8   8   2   85.19    5.00
   8   8   2   87.99    4.20
  -8   8  -2   95.19    5.70
   9  -8   2   98.79    3.90
  -9  -8  -2   96.09    5.10
   9   8   2   95.39    4.30
   9   8   2   98.99    4.20
  -9   8  -2   90.19    4.30
  10  -8   2   97.09    3.70
 -10   8  -2   97.79    3.90
  10   8   2   89.99    3.90
  10   8   2   93.59    3.90
  11  -8   2    1.50    1.20
  11   8   2    1.10    1.40
  10  -9  -2   18.00    2.70
 -10  -9   2   12.20    1.70
  10   9  -2   14.40    1.60
  10   9  -2    9.30    1.50
   9  -9  -2   92.39    3.90
  -9  -9   2   93.89    4.50
   9   9  -2   91.79    4.00
   9   9  -2   97.59    4.10
  -8  -9   2   25.60    3.10
   8  -9  -2   29.60    2.60
   8   9  -2   29.60    2.80
  -8   9   2   28.60    3.10
   7  -9  -2    4.40    1.50
  -7  -9   2    2.40    1.80
   7   9  -2    1.10    2.00
  -7   9   2    2.50    2.10
  -6  -9   2   13.60    2.20
  -5  -9   2  639.34   17.30
   5  -9  -2  610.74   16.30
   5   9  -2  608.84   17.70
  -5   9   2  659.93   17.70
   5   9  -2  630.44   17.00
  -5   9   2  650.13   17.70
   4  -9  -2   49.00    3.90
  -4  -9   2   49.99    4.20
  -4   9   2   46.70    5.20
   4   9  -2   51.09    5.40
   4   9  -2   51.29    4.10
  -4   9   2   50.39    4.90
   3  -9  -2  260.87    8.30
  -3  -9   2  266.47    8.80
   3   9  -2  252.77    9.10
  -3   9   2  261.67    9.40
  -3   9   2  254.87    9.30
  -2  -9   2 1530.35   36.30
   2  -9  -2 1478.75   35.70
   2   9  -2 1501.95   36.60
  -2   9   2 1535.55   37.00
  -2   9   2 1531.65   36.70
   1  -9  -2  101.99    5.30
  -1  -9   2  106.19    5.10
  -1   9   2  112.69    6.00
  -1   9   2  101.09    5.90
   1   9  -2  101.69    5.50
   0  -9  -2   97.89    5.30
   0  -9   2   95.69    4.80
   0   9   2   94.09    5.60
   0   9  -2   95.59    5.30
   0   9   2  103.09    6.30
  -1  -9  -2  715.93   18.80
   1  -9   2  724.83   18.60
   1   9   2  727.33   19.60
  -1   9  -2  742.03   19.40
   2  -9   2   32.20    3.30
  -2  -9  -2   32.70    4.60
   2   9   2   31.50    4.10
   2   9   2   33.20    4.40
  -2   9  -2   32.90    4.20
  -2   9  -2   28.60    3.90
  -3  -9  -2  160.38    7.90
  -3  -9  -2  176.78    7.50
   3  -9   2  167.98    6.30
  -3   9  -2  176.28    7.30
   3   9   2  174.08    7.10
   3   9   2  160.48    7.40
  -3   9  -2  187.48    7.20
  -4  -9  -2  230.98    8.20
   4  -9   2  243.08    7.80
  -4  -9  -2  234.48    8.80
   4   9   2  223.78    8.30
   4   9   2  243.68    8.50
  -4   9  -2  243.08    8.60
  -4   9  -2  239.38    8.70
   4   9   2  233.18    9.10
   5  -9   2  592.64   15.40
  -5  -9  -2  570.84   15.90
  -5  -9  -2  559.14   16.80
   5   9   2  582.94   15.80
  -5   9  -2  593.64   16.30
  -5   9  -2  588.74   16.20
   5   9   2  593.54   16.10
  -6  -9  -2  515.55   14.30
   6  -9   2  535.35   14.00
   6   9   2  515.65   14.00
  -6   9  -2  512.25   14.40
  -6   9  -2  554.44   15.00
   6   9   2  545.75   14.90
   7  -9   2   14.70    2.10
   7   9   2   11.00    2.50
  -7   9  -2    8.80    2.50
   7   9   2   13.20    1.80
  -8  -9  -2  221.38    7.60
   8  -9   2  231.08    6.90
  -8   9  -2  218.48    7.10
   8   9   2  233.08    7.30
   8   9   2  226.68    7.10
  -9  -9  -2    1.60    4.00
   9  -9   2    0.60    1.20
  -9   9  -2    0.90    1.40
   9   9   2    1.80    1.30
   9   9   2    0.00    1.50
  10  -9   2    1.30    1.30
  10   9   2    4.40    1.50
  10   9   2    4.60    1.40
   9 -10  -2   70.59    4.00
  -9 -10   2   82.29    3.60
   9  10  -2   77.59    3.60
  -9  10   2   66.49    3.20
   9  10  -2   80.69    3.30
  -8 -10   2    1.60    1.60
   8 -10  -2   -1.10    1.90
  -8 -10   2    2.20    1.70
   8  10  -2    1.40    1.30
   8  10  -2    0.00    1.70
  -8  10   2   -0.40    1.60
  -7 -10   2  270.77    8.40
   7 -10  -2  266.27    7.80
  -7  10   2  275.07    7.60
   7  10  -2  272.67    8.20
   7  10  -2  278.27    8.10
  -7  10   2  258.67    8.50
  -6 -10   2   29.30    3.30
   6 -10  -2   38.50    3.00
  -6  10   2   34.50    4.10
  -6  10   2   26.00    3.40
   6  10  -2   37.20    3.70
  -6  10   2   32.40    3.40
   6  10  -2   37.10    3.30
  -5 -10   2    7.70    1.80
   5 -10  -2    2.50    1.70
   5  10  -2    4.60    2.10
  -5  10   2    0.40    2.40
  -5  10   2    8.40    2.20
   4 -10  -2  893.61   22.30
  -4 -10   2  912.91   23.10
  -4  10   2  910.91   23.40
   4  10  -2  940.71   23.20
  -4  10   2  917.21   23.30
   4  10  -2  897.61   23.10
   3 -10  -2  101.09    7.30
  -3 -10   2  102.29    5.50
   3  10  -2   95.39    5.30
  -3  10   2   92.99    6.10
  -3  10   2   88.69    5.50
   3  10  -2   99.49    6.40
  -2 -10   2   26.40    3.80
   2 -10  -2   30.60    4.40
   2  10  -2   20.20    3.30
  -2  10   2   21.90    3.30
   2  10  -2   20.90    2.80
  -2  10   2   31.50    4.60
   1 -10  -2   22.40    3.20
  -1 -10   2   21.50    3.60
   1  10  -2   17.70    2.90
   1  10  -2   27.50    4.30
  -1  10   2   21.30    3.20
   0 -10  -2   14.00    3.10
   0 -10   2   17.70    2.60
   0  10   2   12.90    2.80
   0  10  -2   12.30    3.00
   0  10   2    9.50    3.20
   0  10  -2   11.80    2.80
  -1 -10  -2   50.49    5.20
   1 -10   2   44.40    3.90
  -1  10  -2   55.29    4.60
   1  10   2   51.89    4.90
   1  10   2   51.99    5.00
  -2 -10  -2   33.30    4.20
   2 -10   2   35.00    3.70
  -2  10  -2   36.60    4.30
   2  10   2   33.30    4.40
   2  10   2   34.50    4.80
  -3 -10  -2  238.38    8.10
  -3 -10  -2  215.38    7.90
   3  10   2  233.88    8.30
   3  10   2  232.78    9.10
  -4 -10  -2  193.98    6.70
   4 -10   2  196.28    6.50
  -4 -10  -2  205.68    7.40
   4  10   2  201.48    7.50
  -4  10  -2  198.38    7.70
  -4  10  -2  199.18    7.20
   4  10   2  188.98    7.40
  -5 -10  -2  174.38    6.90
   5 -10   2  180.18    6.10
  -5  10  -2  179.88    7.20
  -5  10  -2  183.28    6.70
   5  10   2  189.18    7.20
   6 -10   2    4.80    1.30
  -6  10  -2    1.60    1.80
  -6  10  -2    5.50    2.50
   6  10   2    5.20    2.40
   6  10   2    2.70    2.30
  -7 -10  -2   91.59    4.60
   7 -10   2   87.29    3.60
   7  10   2   88.59    4.20
  -7  10  -2   80.89    4.00
   7  10   2   88.69    4.00
   8 -10   2    0.00    1.20
  -8 -10  -2   -0.20    2.60
  -8  10  -2    2.00    1.40
   8  10   2   -1.50    1.90
   8  10   2   -1.20    1.20
   9 -10   2   71.79    3.10
   9  10   2   76.09    3.90
   9  10   2   79.19    3.20
  -8 -11   2   52.19    2.90
  -8  11   2   47.70    2.60
   8  11  -2   51.79    2.60
   7 -11  -2   18.80    2.80
   7  11  -2   18.20    2.10
  -7  11   2   15.50    2.00
  -7  11   2   17.70    1.90
   7  11  -2   12.60    2.40
   6 -11  -2   13.40    2.40
  -6 -11   2   13.20    2.00
   6  11  -2   11.10    1.50
  -6  11   2   13.20    1.90
   5 -11  -2   29.90    3.70
  -5 -11   2   23.70    3.10
  -5  11   2   28.50    3.40
   5  11  -2   27.90    2.60
  -5  11   2   24.50    2.20
  -4 -11   2  110.29    4.90
   4 -11  -2  111.89    4.90
   4  11  -2  108.09    5.40
  -4  11   2  112.79    5.10
   4  11  -2  108.99    6.40
   3 -11  -2  177.38    6.30
  -3 -11   2  168.88    6.40
   3  11  -2  171.08    6.60
   3  11  -2  176.38    6.70
  -3  11   2  185.28    6.80
   2 -11  -2    2.40    2.40
  -2 -11   2    0.90    1.70
   2  11  -2    2.30    2.00
   2  11  -2    1.20    2.20
  -2  11   2    1.90    1.80
   1 -11  -2  137.79    5.70
  -1 -11   2  122.49    5.20
  -1  11   2  120.99    5.60
   1  11  -2  126.19    5.60
   1  11  -2  125.09    5.90
   0 -11  -2    2.50    2.50
   0 -11   2    0.40    1.50
   0  11  -2   -1.20    1.80
   0  11   2    2.20    3.00
   0  11   2   -1.20    1.90
   1 -11   2  759.52   19.60
  -1 -11  -2  812.52   19.80
   1  11   2  769.92   19.80
   1  11   2  761.32   20.30
  -1  11  -2  764.52   20.20
  -2 -11  -2  176.98    6.60
  -2 -11  -2  180.38    7.30
   2 -11   2  175.48    6.20
   2  11   2  188.58    7.10
   2  11   2  188.58    6.90
  -2  11  -2  186.78    6.80
   3 -11   2   17.50    2.50
   3  11   2   20.10    2.60
   3  11   2   24.60    3.30
  -3  11  -2   16.20    2.20
   3  11   2   23.50    3.70
   4 -11   2   21.50    2.50
   4  11   2   19.50    2.60
  -4  11  -2   24.40    3.10
   4  11   2   29.50    4.40
   5 -11   2  343.37    9.60
   5  11   2  352.56   10.00
  -5  11  -2  354.96   10.20
   6 -11   2   96.59    3.80
   6  11   2   99.09    4.00
  -6  11  -2   82.79    4.90
   7 -11   2    6.20    1.30
  -7 -11  -2    8.10    2.20
   7  11   2    6.70    1.20
  -7  11  -2    2.60    1.60
  -6 -12   2    1.20    2.00
   6  12  -2    2.70    1.00
  -6  12   2    4.70    1.00
  -5 -12   2   -2.60    1.80
  -5  12   2    0.20    2.10
   5  12  -2   -0.70    1.20
  -5  12   2    1.30    1.00
  -4 -12   2   44.20    3.30
   4  12  -2   41.40    2.60
   4  12  -2   36.80    5.40
  -4  12   2   40.90    2.20
  -4  12   2   40.30    3.20
  -3 -12   2   12.10    1.90
  -3  12   2   16.40    2.80
  -3  12   2   14.90    1.80
   3  12  -2   13.80    2.30
   3  12  -2   12.70    2.30
  -2 -12   2  337.87    9.80
   2  12  -2  338.37    9.30
   2  12  -2  337.37   10.10
  -2  12   2  350.56   10.20
  -1 -12   2  226.48    7.10
   1  12  -2  225.28    7.40
  -1  12   2  219.28    7.50
   1  12  -2  209.58    6.70
   0 -12   2   17.40    2.70
   0  12  -2   11.20    1.80
   0  12   2   15.30    2.20
   1 -12   2   94.29    4.20
   1  12   2   95.19    4.60
   1  12   2   92.29    4.40
  -1  12  -2   93.19    4.50
   1  12   2   95.79    3.60
   2 -12   2  118.79    4.60
  -2  12  -2  114.19    4.90
   2  12   2  119.39    5.20
   2  12   2  120.49    4.50
   2  12   2  117.09    4.20
   3 -12   2   61.59    3.40
  -3  12  -2   64.89    3.70
   3  12   2   60.09    6.10
   3  12   2   66.99    3.30
   4  12   2    2.90    1.30
   5 -12   2  121.49    4.20
   5  12   2  112.69    4.00
  -5  12  -2  101.69    4.60
   6 -12   2   32.70    2.70
  -6 -12  -2   25.30    3.50
   6  12   2   38.20    2.20
  -6  12  -2   27.50    2.00
  -3 -13   2   14.90    2.10
  -3  13   2   16.30    1.50
  -3  13   2   10.90    1.90
   3  13  -2   12.40    1.70
  -2 -13   2  224.68    6.80
  -2  13   2  226.38    6.10
   2  13  -2  213.98    6.90
  -2  13   2  230.58    7.00
  -1 -13   2    1.80    1.90
   1  13  -2    0.00    1.90
  -1  13   2    2.20    1.60
  -1  13   2    2.00    0.90
   0 -13   2   22.50    3.10
   0  13  -2   25.80    2.70
   0  13   2   18.90    1.80
   0  13   2   18.90    2.90
   1 -13   2   10.80    1.90
   1  13   2    7.40    1.20
  -1  13  -2    6.60    1.50
   1  13   2    9.90    2.00
   2 -13   2    6.30    1.70
   2  13   2    5.00    2.20
   2  13   2    9.20    2.00
  -2  13  -2    6.60    1.60
   3 -13   2   94.79    3.90
  -3  13  -2   92.69    3.90
   3  13   2   86.59    3.50
 -14   0   3    1.20    1.00
 -14   0   3    2.10    1.20
 -13   0   3  276.37    8.40
 -12   0   3    1.50    2.20
 -12   0   3    1.50    2.00
 -11   0   3   12.40    2.60
 -11   0   3   12.80    2.40
 -11   0   3   15.20    3.00
 -10   0   3    2.30    2.10
 -10   0   3    0.70    2.30
 -10   0   3    0.30    2.30
  -9   0   3  441.66   12.50
   9   0  -3  437.86   12.90
  -9   0   3  448.86   12.60
  -9   0   3  447.06   13.30
  -8   0   3   -1.30    2.80
  -8   0   3    0.90    2.10
  -8   0   3   -3.10    2.60
   8   0  -3    0.30    2.80
   7   0  -3 1470.05   34.80
  -7   0   3 1446.06   34.20
   6   0  -3    4.40    1.20
   5   0  -3 3332.07   76.19
   5   0  -3 3497.15   76.79
   4   0  -3   -0.60    0.50
   4   0  -3    0.30    0.40
   3   0  -3 3462.75   77.19
   1   0  -3  914.81   26.70
  -1   0   3 1050.59   25.90
   1   0  -3 1054.89   23.30
   0   0  -3    2.40    1.50
  -1   0  -3    3.20    0.60
  -2   0  -3    0.40    0.50
   2   0   3    0.50    2.60
   2   0   3    1.20    0.40
   3   0   3 1377.76   47.80
   3   0   3 1446.96   32.40
   4   0   3    0.50    5.90
  -4   0  -3    3.60    1.30
   4   0   3   -0.70    0.60
   5   0   3  454.85   11.80
  -5   0  -3  454.55   11.80
  -5   0  -3  436.36   12.40
   6   0   3   -0.80    1.40
   6   0   3    0.60    1.80
  -6   0  -3    0.70    1.40
  -6   0  -3    0.90    1.10
  -7   0  -3  451.45   12.30
   7   0   3  446.76   12.20
  -8   0  -3   -0.90    1.50
  -8   0  -3    3.20    2.50
   8   0   3    1.20    2.00
  -9   0  -3  433.76   12.60
   9   0   3  432.26   12.50
  -9   0  -3  442.66   12.70
  10   0   3    2.30    2.60
 -10   0  -3    0.10    2.20
 -10   0  -3    3.70    2.10
 -11   0  -3  138.49    5.80
 -11   0  -3  131.29    5.40
  11   0   3  134.69    5.80
 -12   0  -3   -0.50    1.40
 -12   0  -3   -0.70    1.40
 -13   0  -3  455.85   11.60
 -13   0  -3  466.05   12.10
 -14  -1   3  106.29    3.70
 -14  -1   3  103.49    3.90
 -14   1   3  107.59    3.90
 -14   1   3  100.79    3.60
 -13  -1   3  361.46   10.10
 -13  -1   3  368.46   10.50
 -13   1   3  371.36   10.10
 -13   1   3  377.96   10.50
 -12  -1   3  331.87   10.00
 -12  -1   3  326.97   10.60
 -12   1   3  333.47   10.50
 -12   1   3  325.57   10.00
 -11  -1   3  677.03   18.50
 -11  -1   3  686.13   17.80
  11   1  -3  653.13   18.30
 -11   1   3  685.83   17.90
 -11   1   3  679.13   18.40
 -11   1   3  672.43   17.80
 -10  -1   3  629.64   16.40
 -10  -1   3  595.04   17.20
  10   1  -3  621.04   16.50
 -10   1   3  608.64   16.30
 -10   1   3  601.64   16.30
 -10   1   3  606.74   17.00
  -9  -1   3  364.56   11.10
  -9  -1   3  364.96   11.80
  -9  -1   3  372.66   11.00
  -9   1   3  357.46   11.50
  -9   1   3  372.16   10.90
  -9   1   3  369.66   11.00
  -8  -1   3   22.40    3.20
  -8  -1   3   27.10    4.80
   8  -1  -3   15.90    3.10
  -8  -1   3   19.20    2.90
  -8   1   3   17.90    3.30
  -8   1   3   15.40    2.80
   7  -1  -3  332.47    9.60
   7   1  -3  340.07   10.20
  -7   1   3  337.97    9.70
   6  -1  -3  665.53   16.20
  -6  -1   3  659.33   16.50
   6   1  -3  652.03   15.90
   6   1  -3  668.53   16.70
   6   1  -3  636.04   36.70
   5  -1  -3 2213.78   51.19
  -5  -1   3 2243.98   51.59
   5   1  -3 2292.57   51.69
   5   1  -3 2180.68   51.29
   5   1  -3 2396.66   69.59
   4  -1  -3  915.71   21.10
   4  -1  -3  922.71   21.20
  -4  -1   3  903.11   21.90
   4   1  -3  919.21   21.60
   4   1  -3  936.91   21.70
   3  -1  -3   82.19    2.40
   3  -1  -3   74.89    6.60
  -3  -1   3   72.69    2.90
   3  -1  -3   74.09    2.50
   3   1  -3   72.19    2.70
   3   1  -3   72.99    2.60
   3   1  -3   81.39    6.40
  -2  -1   3 3845.32   85.99
  -1  -1  -3 1141.49   25.20
   1   1   3 1101.19   25.20
  -1   1  -3 1096.59   25.30
  -1   1  -3 1110.39   25.50
   1   1   3 1091.09   34.30
  -2  -1  -3 5222.48  116.99
  -2   1  -3 5306.97  117.09
  -3  -1  -3 4811.72  107.69
  -3   1  -3 4838.42  107.69
  -4  -1  -3 1095.09   24.90
   4  -1   3 1008.90   24.60
   4   1   3 1039.90   24.70
  -4   1  -3 1052.09   24.20
  -4   1  -3 1038.90   25.00
  -5  -1  -3  184.38    6.20
   5  -1   3  180.08    5.90
  -5  -1  -3  195.68    6.40
   5   1   3  174.88    6.30
  -5   1  -3  186.28    6.20
   5   1   3  218.98    6.30
  -5   1  -3  185.38    5.40
  -5   1  -3  189.78    5.20
   6  -1   3  210.78    7.00
  -6  -1  -3  213.68    6.90
   6  -1   3  204.88    7.10
  -6   1  -3  218.98    6.90
   6   1   3  220.18    7.20
   6   1   3  215.88    6.90
   7  -1   3   87.49    4.90
  -7  -1  -3   82.09    6.30
  -7  -1  -3   87.19    4.30
  -7   1  -3   86.09    5.30
  -7   1  -3   79.39    6.60
   7   1   3   80.89    4.40
  -8  -1  -3  102.59    4.80
   8  -1   3   97.59    5.60
  -8  -1  -3  101.59    5.80
  -8   1  -3   99.39    4.80
   8   1   3   97.99    4.90
  -8   1  -3  101.09    5.30
  -9  -1  -3  190.08    7.40
  -9  -1  -3  192.88    7.20
   9  -1   3  189.98    7.60
  -9   1  -3  197.28    7.40
  -9   1  -3  197.98    7.30
   9   1   3  191.58    7.30
  10  -1   3   11.30    3.50
 -10  -1  -3    8.70    2.20
 -10  -1  -3   11.40    2.60
 -10   1  -3    4.50    2.20
 -10   1  -3    6.90    2.00
  10   1   3    5.10    2.40
 -11  -1  -3  203.38    7.20
 -11  -1  -3  198.38    7.00
 -11   1  -3  204.78    7.10
  11   1   3  201.38    7.00
 -11   1  -3  207.68    7.30
 -12  -1  -3    1.70    1.50
 -12  -1  -3    2.20    1.50
 -12   1  -3    1.40    1.40
  12   1   3    2.20    2.50
 -12   1  -3    4.10    1.40
 -13  -1  -3   10.80    1.40
 -13   1  -3    8.50    1.40
 -13   1  -3   11.10    1.40
 -14  -2   3   50.49    2.50
 -14  -2   3   49.00    2.70
 -14   2   3   55.09    2.40
 -14   2   3   52.69    2.70
 -13  -2   3   18.60    2.40
 -13  -2   3   14.80    1.70
 -13   2   3   16.80    2.30
 -13   2   3   18.40    2.20
 -12  -2   3   73.29    5.10
 -12  -2   3   81.19    4.50
  12   2  -3   72.39    4.80
 -12   2   3   70.69    4.70
 -11  -2   3  122.59    5.60
 -11  -2   3  120.39    6.30
 -11   2   3  118.59    5.60
 -11   2   3  124.09    6.10
  11   2  -3  115.29    6.50
 -10  -2   3  142.39    6.90
 -10  -2   3  138.59    6.20
 -10   2   3  137.09    6.00
 -10   2   3  140.29    6.50
 -10   2   3  132.19    6.10
  -9  -2   3    3.30    2.40
  -9  -2   3    9.50    3.10
  -9   2   3    6.20    2.60
  -9   2   3    5.80    2.50
  -9   2   3    6.20    2.00
  -8  -2   3   -0.90    2.80
  -8  -2   3    1.30    2.60
  -8   2   3   -0.60    2.60
  -8   2   3    4.20    2.50
   7  -2  -3 3134.09   69.69
  -7  -2   3 3098.09   69.89
   7  -2  -3 3003.80   99.39
  -7   2   3 3047.90   69.59
   7   2  -3 3039.70   70.79
  -6  -2   3  320.77   10.20
   6  -2  -3  332.97   23.00
   6  -2  -3  320.47    8.70
  -6   2   3  323.77    9.30
   6   2  -3  338.97    9.70
   6   2  -3  334.47    9.30
   5  -2  -3    1.00    0.70
  -5  -2   3    2.00    1.40
   5  -2  -3    2.00    3.10
   5   2  -3    1.60    0.90
   5   2  -3   -0.50    5.80
   4  -2  -3  336.17   18.40
   4  -2  -3  343.57    8.20
  -4  -2   3  345.57    9.50
   4  -2  -3  339.47    8.40
   4   2  -3  333.27    9.10
   4   2  -3  345.17    9.10
   3  -2  -3  333.17   16.50
   3  -2  -3  324.47    7.70
  -3  -2   3  333.57    9.10
   3   2  -3  326.67    8.70
   3   2  -3  325.57    8.50
  -2  -2   3 4945.01  110.59
  -1  -2   3  120.69    4.10
   1  -2  -3  121.69    3.00
   1  -2  -3  123.79    8.10
  -1   2   3  120.09    8.70
  -1  -2  -3  213.38    5.50
  -1   2  -3  211.98    5.80
   1   2   3  208.88    5.40
   1   2   3  208.68   12.10
  -2  -2  -3   10.20    4.50
  -2  -2  -3   12.00    1.70
  -2  -2  -3   10.90    1.40
   2   2   3   14.10    6.10
  -2   2  -3   11.30    1.00
  -2   2  -3   10.50    1.40
   2   2   3   11.90    1.00
  -3  -2  -3  324.37    9.00
  -3  -2  -3  316.47    8.60
   3   2   3  311.87    8.40
  -3   2  -3  326.27    8.20
  -3   2  -3  320.77    8.60
  -4  -2  -3  105.79    4.60
  -4  -2  -3   94.89    4.60
  -4   2  -3  110.59    3.30
   4   2   3  111.09    3.90
  -4   2  -3  113.69    4.60
  -5  -2  -3  839.72   21.60
  -5  -2  -3  865.71   20.80
  -5   2  -3  852.31   20.90
   5   2   3  870.01   20.90
   5   2   3  867.71   21.30
   6  -2   3  484.95   13.60
  -6  -2  -3  512.25   13.40
  -6   2  -3  520.95   13.50
   6   2   3  502.05   14.00
   6   2   3  526.85   13.50
  -7  -2  -3 1266.47   35.50
  -7  -2  -3 1538.65   36.10
   7  -2   3 1461.95   34.80
   7   2   3 1522.55   35.10
  -7   2  -3 1559.44   35.20
  -7   2  -3 1517.45   35.10
  -8  -2  -3  359.26   10.80
  -8   2  -3  362.86   10.80
  -8   2  -3  368.26   10.90
   8   2   3  370.56   10.90
  -9  -2  -3    5.60    2.60
  -9  -2  -3    8.00    2.00
  -9   2  -3    4.60    2.20
  -9   2  -3    1.60    1.70
   9   2   3    5.90    2.20
 -10  -2  -3   32.00    4.00
 -10  -2  -3   40.00    4.50
  10   2   3   39.00    4.40
 -10   2  -3   35.30    3.80
 -10   2  -3   35.50    3.90
 -11  -2  -3   69.79    3.90
 -11  -2  -3   72.29    4.60
  11   2   3   72.59    4.10
 -11   2  -3   80.99    4.70
 -11   2  -3   77.69    3.90
 -12  -2  -3   33.80    2.70
 -12  -2  -3   29.10    2.90
 -12   2  -3   29.00    2.70
 -12   2  -3   29.30    2.50
  12   2   3   31.90    3.30
 -13  -2  -3  283.87    8.10
 -13   2  -3  298.77    8.30
 -14  -3   3  397.96   11.50
 -14   3   3  423.66   11.10
 -13  -3   3  210.18    6.70
 -13  -3   3  203.98    6.20
 -13   3   3  208.98    6.50
 -13   3   3  202.78    6.10
  13   3  -3  198.38    7.00
 -12  -3   3  913.81   26.80
 -12  -3   3  991.30   26.30
 -12   3   3  998.10   24.80
  12   3  -3  982.70   23.90
 -11  -3   3  265.77    8.70
 -11  -3   3  265.97    9.50
 -11   3   3  253.87    9.00
  11   3  -3  261.57    8.40
 -10  -3   3   24.40    3.80
 -10  -3   3   24.40    4.40
 -10   3   3   21.30    3.80
 -10   3   3   25.40    3.50
 -10   3   3   22.60    3.00
  -9  -3   3  335.87   14.00
  -9  -3   3  353.66   11.30
  -9   3   3  390.46   11.00
  -9   3   3  379.76   11.00
  -8  -3   3  265.77    8.80
  -8  -3   3  277.47    9.00
  -8  -3   3  277.47    9.90
  -8   3   3  280.77    9.20
  -8   3   3  275.37    8.70
  -8   3   3  273.57    9.40
  -7  -3   3 2688.53   61.39
  -7  -3   3 2632.04   62.39
  -7  -3   3 2649.43   61.59
  -7   3   3 2686.83   61.89
  -7   3   3 2723.93   61.29
   6  -3  -3    6.90    5.20
   6  -3  -3    9.10    1.50
  -6  -3   3    6.20    1.70
   6   3  -3    8.50    1.80
  -6   3   3   12.30    2.00
   6   3  -3    7.90    1.60
  -5  -3   3  859.51   20.80
  -5  -3   3  825.62   22.00
   5  -3  -3  810.42   19.40
   5  -3  -3  866.21   37.70
   5   3  -3  887.71   21.20
  -5   3   3  851.91   20.70
  -4  -3   3 2056.89   48.90
   4  -3  -3 2063.99   47.30
   4   3  -3 2068.69   48.40
   4   3  -3 2217.98   60.49
   4   3  -3 2081.89   48.10
   3  -3  -3 1750.52   41.20
  -3  -3   3 1797.22   42.10
   3   3  -3 1808.72   41.80
   3   3  -3 1816.82   48.40
   3   3  -3 1848.72   41.40
  -2  -3   3 3443.56   81.19
   2  -3  -3 3312.37   87.29
   2  -3  -3 3325.27   73.89
  -2  -3   3 3196.98   74.49
  -2   3   3 3340.77   89.69
   2   3  -3 3215.98   73.69
   2   3  -3 3215.78   79.19
   2   3  -3 3239.88   74.29
   1  -3  -3   47.00    5.80
  -1  -3   3   44.80    2.70
   1  -3  -3   48.50    2.50
   1   3  -3   44.30    2.20
  -1   3   3   43.20    7.30
   0  -3   3 5141.19  115.99
   0  -3  -3 5434.16  130.39
   0  -3  -3 5220.78  115.89
   0   3   3 5097.99  129.19
   0   3  -3 4998.40  115.69
  -1  -3  -3  860.51   20.80
  -1  -3  -3  864.51   19.80
   1  -3   3  862.51   27.30
   1  -3   3  871.31   20.70
   1   3   3  840.12   31.30
   1   3   3  840.32   19.70
  -1   3  -3  852.91   20.40
  -2  -3  -3 7114.49  158.28
  -2  -3  -3 7159.98  159.18
   2  -3   3 6969.90  158.78
   2   3   3 7039.30  175.78
  -2   3  -3 7367.06  158.48
  -3  -3  -3 3031.80   68.49
  -3  -3  -3 3056.79   69.19
   3   3   3 2913.01   68.19
  -3   3  -3 2959.30   68.09
  -3   3  -3 3086.49   68.39
   3   3   3 3109.89   89.19
  -4  -3  -3 6468.65  140.89
  -4  -3  -3 6423.06  142.19
   4   3   3 6286.87  141.19
  -4   3  -3 6302.97  141.29
  -4   3  -3 6218.18  140.39
   4   3   3 6207.98  140.79
  -5  -3  -3 3862.21   84.09
  -5  -3  -3 3751.82   83.99
  -5   3  -3 3586.94   83.89
   5   3   3 3764.22   84.59
   5   3   3 3648.54   83.89
  -6  -3  -3    2.00    1.60
   6   3   3    5.30    1.70
   6   3   3    4.20    2.00
  -6   3  -3    3.50    1.50
  -7  -3  -3  286.97   11.30
  -7  -3  -3  274.37    8.50
   7   3   3  261.77    8.40
  -7   3  -3  261.97    8.60
  -7   3  -3  261.87    8.30
   7   3   3  240.08   10.20
  -8  -3  -3 1196.58   29.30
  -8  -3  -3 1195.18   29.40
  -8   3  -3 1231.28   29.20
   8   3   3 1189.98   29.30
  -8   3  -3 1173.68   29.90
  -8   3  -3 1218.68   29.40
  -9  -3  -3  101.09    5.10
  -9  -3  -3   95.19    6.20
  -9   3  -3   92.19    5.20
  -9   3  -3   91.69    5.00
   9   3   3   95.59    5.30
  -9   3  -3   88.59    7.20
 -10  -3  -3  494.15   13.80
 -10   3  -3  498.75   13.80
 -11  -3  -3    6.60    1.60
 -11   3  -3    7.60    2.20
 -11   3  -3    4.60    1.40
  11   3   3    6.50    1.70
 -12  -3  -3  133.89    4.80
 -12  -3  -3  136.99    5.10
  12   3   3  137.19    5.20
 -12   3  -3  140.39    4.80
 -12   3  -3  138.69    5.10
  13   3   3   34.60    4.00
 -13   3  -3   47.30    2.70
 -13  -4   3    2.10    1.30
 -13  -4   3    4.10    1.40
  13   4  -3    4.30    2.10
 -13   4   3    3.00    1.20
 -13   4   3    1.20    1.20
 -12  -4   3    0.10    1.50
 -12  -4   3    1.80    1.60
 -12   4   3    1.20    1.40
 -12   4   3    1.50    1.40
  12   4  -3    1.40    1.70
 -11  -4   3   41.40    4.40
 -11  -4   3   37.00    3.80
 -11   4   3   32.60    3.70
 -11   4   3   35.50    4.10
  11   4  -3   38.00    3.20
 -10  -4   3  168.38    6.70
 -10  -4   3  168.98    7.70
 -10   4   3  167.18    7.00
 -10   4   3  165.18    6.60
  -9  -4   3   -0.30    2.40
  -9  -4   3    3.20    2.50
  -9   4   3    4.80    1.80
  -9   4   3    5.80    2.50
  -9   4   3    2.60    2.20
  -8  -4   3    6.70    2.60
  -8  -4   3    1.40    2.50
  -8  -4   3    3.70    2.00
  -8   4   3    3.30    1.70
  -8   4   3    4.90    2.70
  -8   4   3    7.00    2.20
  -7  -4   3 2576.54   58.59
  -7  -4   3 2522.85   58.39
  -7   4   3 2502.95   58.29
  -7   4   3 2518.65   58.49
  -7   4   3 2551.74   58.89
   6  -4  -3 1543.25   63.49
  -6  -4   3 1687.93   37.80
   6   4  -3 1620.44   38.70
  -6   4   3 1615.84   37.50
   6   4  -3 1536.15   38.70
   5  -4  -3  547.15   30.70
  -5  -4   3  540.85   14.10
   5   4  -3  510.65   30.20
   5   4  -3  541.55   14.50
   5   4  -3  544.85   14.90
   4  -4  -3   28.40    7.60
  -4  -4   3   30.00    3.10
   4  -4  -3   29.10    2.90
   4   4  -3   25.80    2.60
   4   4  -3   30.40    9.10
   4   4  -3   27.60    2.40
   3  -4  -3  389.96   10.70
   3  -4  -3  391.16   21.90
  -3  -4   3  446.06   14.10
   3   4  -3  405.16   10.60
   3   4  -3  382.96   11.10
   3   4  -3  384.36   18.10
  -2  -4   3 1206.28   30.80
   2  -4  -3 1269.57   44.10
   2  -4  -3 1336.97   30.30
   2   4  -3 1306.27   38.30
  -2   4   3 1247.78   47.30
   2   4  -3 1281.17   29.80
   2   4  -3 1295.07   30.50
   1  -4  -3  446.16   21.50
   1  -4  -3  447.06   11.70
  -1  -4   3  426.56   12.10
  -1   4   3  418.36   23.80
   1   4  -3  434.36   11.60
   0  -4  -3 2160.78   49.99
   0  -4  -3 2317.37   67.09
   0  -4  -3 2193.68   48.30
   0  -4   3 2124.89   57.29
   0  -4   3 2166.08   50.19
   0   4   3 2217.08   66.79
   0   4   3 2129.19   48.20
   0   4  -3 2003.20   49.60
  -1  -4  -3 2646.24   58.89
   1  -4   3 2596.14   58.69
   1  -4   3 2544.55   68.39
   1   4   3 2520.25   57.19
   1   4   3 2471.15   75.39
  -1   4  -3 2530.55   58.19
  -2  -4  -3 2507.65   57.49
  -2  -4  -3 2412.36   55.79
   2  -4   3 2498.45   69.79
   2  -4   3 2528.65   56.89
   2   4   3 2576.94   83.29
  -2   4  -3 2374.86   55.99
   2   4   3 2423.86   55.69
  -2   4  -3 2418.46   56.19
  -3  -4  -3 3856.81   86.89
  -3  -4  -3 3619.24  113.89
   3  -4   3 3893.31  105.29
  -3   4  -3 3918.11   86.59
  -3   4  -3 4012.60   86.79
   3   4   3 3800.62   86.69
  -4  -4  -3  515.95   31.70
   4  -4   3  515.85   27.80
  -4  -4  -3  519.85   13.60
  -4   4  -3  526.55   13.10
  -4   4  -3  581.14   16.40
  -4   4  -3  529.65   13.60
   4   4   3  508.35   13.70
   4   4   3  505.35   13.60
   5  -4   3 1195.08   51.09
  -5  -4  -3 1199.58   28.90
  -5  -4  -3 1280.97   28.80
   5   4   3 1215.18   28.70
   5   4   3 1168.18   29.40
  -5   4  -3 1228.08   28.80
  -5   4  -3 1146.29   28.70
  -6  -4  -3  245.98    8.30
   6   4   3  233.58    7.60
  -6   4  -3  224.38    8.00
  -6   4  -3  224.08    8.50
   6   4   3  218.88    8.90
  -7  -4  -3 1576.54   37.50
   7   4   3 1594.24   37.70
  -7   4  -3 1617.54   37.50
  -7   4  -3 1614.34   37.70
  -7   4  -3 1549.45   38.00
   7   4   3 1547.25   37.80
  -8  -4  -3   93.49    4.90
   8   4   3   95.19    5.10
  -8   4  -3   95.39    5.30
  -8   4  -3   89.09    6.60
   8   4   3   88.19    6.60
  -8   4  -3   93.09    4.80
  -9  -4  -3 1672.93   39.50
   9   4   3 1651.23   40.40
   9   4   3 1677.93   39.60
  -9   4  -3 1700.33   39.30
  -9   4  -3 1597.34   39.50
  -9   4  -3 1614.14   39.40
 -10  -4  -3 1185.18   28.90
 -10   4  -3 1156.68   29.00
 -10   4  -3 1182.68   29.20
 -10   4  -3 1209.98   28.90
  10   4   3 1204.68   29.10
 -11  -4  -3  793.02   19.90
 -11   4  -3  799.82   20.20
  11   4   3  794.72   20.10
 -12  -4  -3    1.50    2.00
 -12   4  -3   -0.80    1.20
  12   4   3   -0.70    1.60
  13  -4   3  115.29    3.80
  13   4   3  108.49    5.80
 -13  -5   3  212.68    6.30
 -13  -5   3  202.18    5.80
  13   5  -3  196.28    6.20
 -13   5   3  210.18    6.10
 -12  -5   3  472.85   13.10
 -12  -5   3  494.35   12.40
  12   5  -3  495.05   12.90
 -12   5   3  483.85   12.90
 -12   5   3  463.55   12.10
 -11  -5   3  538.75   15.10
 -11   5   3  511.25   14.40
  11   5  -3  506.35   14.10
 -10  -5   3  235.38    8.00
 -10  -5   3  231.28    9.00
 -10   5   3  225.18    8.30
  10   5  -3  236.68    9.40
 -10   5   3  219.38    7.80
  -9  -5   3    8.70    2.30
  -9  -5   3    7.30    2.90
  -9  -5   3    3.30    2.60
   9   5  -3    4.60    2.80
  -9   5   3    5.40    2.10
  -9   5   3    8.50    2.70
  -8  -5   3   30.20    3.60
  -8  -5   3   28.50    3.90
  -8  -5   3   23.70    4.30
  -8   5   3   29.00    3.60
  -8   5   3   26.80    4.40
  -7  -5   3   42.50    3.90
  -7  -5   3   35.10    3.90
  -7   5   3   43.00    4.30
  -6  -5   3   21.80    3.40
  -6  -5   3   20.60    4.70
  -6   5   3   24.10    3.30
  -5  -5   3  694.73   18.10
   5  -5  -3  690.53   38.50
   5   5  -3  716.83   19.60
   5   5  -3  709.43   18.80
  -5   5   3  735.53   18.50
  -4  -5   3   23.50    2.90
   4  -5  -3   23.30    9.80
   4   5  -3   24.80    3.10
  -4   5   3   28.10    4.10
   4   5  -3   24.20    2.90
  -3  -5   3 2618.24   72.09
  -3  -5   3 2337.97   54.49
   3  -5  -3 2424.46   76.89
   3  -5  -3 2299.57   55.19
  -3   5   3 2279.07   54.69
   3   5  -3 2330.27   69.39
   3   5  -3 2418.16   54.89
   3   5  -3 2391.26   55.89
   2  -5  -3   71.49    9.90
   2  -5  -3   74.69    5.10
  -2  -5   3   69.99    3.90
   2   5  -3   72.19    3.80
   2   5  -3   77.69   11.10
   2   5  -3   70.69    3.20
  -2   5   3   68.49    4.50
   1  -5  -3    6.60    2.40
   1  -5  -3    4.00    2.90
  -1  -5   3    7.20    1.70
  -1  -5   3    5.50    3.50
   1   5  -3    8.10    1.60
   1   5  -3    6.70    1.20
  -1   5   3    8.50    2.30
   0  -5  -3  200.48   17.00
   0  -5   3  182.88    6.00
   0  -5   3  203.58   12.60
   0   5   3  227.38    5.00
   0   5  -3  197.48    6.60
   0   5   3  182.78    6.80
   1  -5   3 6171.88  150.58
   1  -5   3 6072.69  136.49
   1  -5   3 6037.90  134.39
  -1   5  -3 5915.21  134.69
  -1   5  -3 5944.81  135.49
   1   5   3 6162.88  134.09
   1   5   3 5961.10  134.99
   2  -5   3 1512.65   37.50
   2  -5   3 1586.44   52.39
  -2  -5  -3 1520.25   36.00
   2   5   3 1603.24   35.80
  -2   5  -3 1508.65   36.10
   2   5   3 1505.25   36.40
  -2   5  -3 1617.54   36.30
   3  -5   3  796.52   19.50
   3  -5   3  777.42   21.50
   3  -5   3  839.52   35.90
  -3   5  -3  857.81   20.40
   3   5   3  832.32   20.10
  -3   5  -3  827.52   20.10
   3   5   3  811.12   20.60
  -3   5  -3  801.42   20.00
   3   5   3  818.32   20.00
  -3   5  -3  810.52   20.50
  -4  -5  -3 1146.69   28.00
  -4  -5  -3 1211.68   56.19
  -4  -5  -3 1166.48   28.20
   4  -5   3 1146.29   48.20
   4   5   3 1183.28   28.00
  -4   5  -3 1169.78   28.00
  -4   5  -3 1208.18   28.00
   4   5   3 1157.48   28.30
   4   5   3 1137.39   28.60
  -5  -5  -3 1279.07   30.80
  -5   5  -3 1283.57   30.80
   5   5   3 1236.58   31.00
  -5   5  -3 1295.47   30.70
   5   5   3 1291.57   30.90
  -5   5  -3 1321.87   30.70
  -6  -5  -3  505.65   13.60
  -6  -5  -3  500.95   14.30
  -6   5  -3  487.05   14.50
  -6   5  -3  510.25   13.70
   6   5   3  490.85   14.10
  -6   5  -3  514.05   13.80
   6   5   3  505.65   13.80
  -7  -5  -3  113.29    5.30
   7   5   3  107.89    6.30
  -7   5  -3  111.39    5.20
   7   5   3  117.49    5.50
  -7   5  -3  106.89    6.70
  -7   5  -3  118.19    5.70
  -8  -5  -3    2.60    2.00
   8   5   3    1.50    2.00
  -8   5  -3    3.70    2.90
   8   5   3    6.30    2.80
  -8   5  -3    2.60    1.70
  -8   5  -3    3.50    2.10
  -9  -5  -3  321.67   11.50
  -9   5  -3  313.47   10.50
   9   5   3  338.17   10.70
  -9   5  -3  318.97   10.30
   9   5   3  326.67   10.60
  -9   5  -3  330.07   10.00
 -10  -5  -3   48.90    3.60
 -10   5  -3   44.90    3.20
  10   5   3   50.89    3.40
 -11  -5  -3  100.79    4.60
 -11   5  -3  104.29    4.30
  11   5   3   99.59    4.30
  12  -5   3   62.19    2.80
  12   5   3   61.69    3.30
  12  -6  -3   12.40    1.60
 -12  -6   3   13.00    2.30
 -12  -6   3   12.20    3.50
  12   6  -3   17.70    2.60
 -11  -6   3    2.70    2.00
 -11  -6   3    2.50    1.70
  11   6  -3    6.10    1.50
 -11   6   3    4.70    1.40
 -11   6   3    5.50    2.00
 -10  -6   3  116.99    5.90
 -10  -6   3  118.39    6.50
  10   6  -3  119.59    6.30
 -10   6   3  121.29    5.70
 -10   6   3  121.79    5.70
  -9  -6   3   19.60    3.20
  -9  -6   3   14.80    2.70
  -9  -6   3   15.10    3.00
  -9   6   3   16.20    2.70
   9   6  -3   15.10    2.70
  -9   6   3   18.40    3.30
  -8  -6   3    6.70    2.30
  -8  -6   3    9.80    3.30
  -8   6   3   12.40    2.30
   8   6  -3    9.60    2.50
  -7  -6   3    2.80    3.40
  -7  -6   3    4.40    2.10
  -7   6   3    4.30    3.50
  -7   6   3    6.10    3.00
  -6  -6   3  487.85   14.60
  -6  -6   3  500.45   13.80
  -6   6   3  494.35   14.00
  -5   6   3   94.99    5.70
  -5   6   3  107.09    5.90
  -4  -6   3  971.80   24.00
   4  -6  -3  961.70   23.30
   4   6  -3  970.30   24.90
   4   6  -3  988.80   24.10
  -4   6   3 1010.10   24.40
  -4   6   3  993.40   24.60
  -3  -6   3   31.00    3.10
   3  -6  -3   29.10   11.40
   3  -6  -3   29.70    3.50
  -3   6   3   35.20    3.90
   3   6  -3   25.10    3.70
   3   6  -3   31.50    3.40
   3   6  -3   32.70    3.80
   2  -6  -3 3446.66  102.39
   2  -6  -3 3130.49   74.29
  -2  -6   3 3355.06   74.79
   2   6  -3 3267.77   74.89
  -2   6   3 3299.27   75.29
   2   6  -3 3363.76   75.39
   2   6  -3 3288.07   76.69
   1  -6  -3 1942.41   67.49
  -1  -6   3 1787.02   42.40
   1   6  -3 1822.02   42.70
  -1   6   3 1824.22   43.00
   1   6  -3 1909.21   42.90
   1   6  -3 1790.32   44.10
   0  -6   3  682.83   17.00
   0  -6   3  748.73   32.10
   0  -6  -3  632.04   37.60
   0   6  -3  686.23   17.40
   0   6   3  690.63   17.70
   0   6  -3  709.63   17.30
   0   6  -3  699.53   18.50
   1  -6   3  203.58   15.40
   1  -6   3  195.78    6.10
   1   6   3  204.58    5.60
  -1   6  -3  193.78    6.60
   1   6   3  196.88    7.00
  -1   6  -3  197.28    7.10
  -2  -6  -3   46.00    5.40
   2  -6   3   50.79    3.00
   2  -6   3   44.30   10.30
  -2   6  -3   45.80    3.50
  -2   6  -3   43.70    3.40
   2   6   3   38.20    4.60
   2   6   3   42.00    4.10
   2   6   3   42.70    2.90
   3  -6   3 1278.47   30.30
   3  -6   3 1295.87   51.39
  -3  -6  -3 1251.87   30.90
   3   6   3 1289.27   30.70
  -3   6  -3 1342.27   30.80
  -3   6  -3 1302.67   30.80
  -3   6  -3 1324.07   31.60
   3   6   3 1305.17   30.90
   3   6   3 1240.28   32.60
   3   6   3 1305.67   31.20
  -4  -6  -3  217.38    7.70
  -4  -6  -3  211.98    8.30
   4  -6   3  219.58    6.80
   4  -6   3  243.08   31.50
   4   6   3  207.48    8.00
   4   6   3  229.68    8.70
  -4   6  -3  221.48    7.40
   4   6   3  216.98    8.00
   4   6   3  222.18    7.40
  -4   6  -3  226.68    7.60
  -5  -6  -3   28.80    3.40
   5  -6   3   29.90    2.60
  -5   6  -3   25.80    3.20
   5   6   3   32.40    3.60
  -5   6  -3   27.60    3.90
  -5   6  -3   26.20    4.00
   5   6   3   29.40    4.30
  -6  -6  -3   29.30    5.00
  -6  -6  -3   31.30    3.70
  -6   6  -3   34.20    3.40
   6   6   3   41.00    4.60
  -6   6  -3   29.40    3.60
  -6   6  -3   30.40    3.80
   6   6   3   35.10    3.80
  -7  -6  -3 1233.78   30.10
  -7  -6  -3 1201.28   31.30
  -7   6  -3 1207.98   30.30
   7   6   3 1238.08   30.40
   7   6   3 1289.87   30.40
  -7   6  -3 1250.27   30.20
  -8  -6  -3  252.17    8.70
  -8  -6  -3  253.27   15.60
  -8   6  -3  253.17    8.60
  -8   6  -3  248.78    9.00
   8   6   3  260.97    9.00
   8   6   3  264.57    8.90
  -9  -6  -3  165.68    6.10
   9   6   3  174.98    7.20
  -9   6  -3  166.68    6.10
   9   6   3  178.68    6.30
  -9   6  -3  156.18    7.10
 -10  -6  -3   99.69    4.80
  10  -6   3  106.89    4.10
 -10   6  -3   99.79    4.30
  10   6   3  107.29    4.50
  10   6   3  102.79    5.00
  11  -6   3   46.50    2.60
  11   6   3   41.40    2.90
  12  -6   3   57.59    2.70
  12   6   3   54.99    2.90
 -12  -7   3  259.57    7.40
  12   7  -3  262.17    7.40
 -12   7   3  251.27    7.20
  11  -7  -3   38.30    2.80
 -11  -7   3   37.10    3.00
  11   7  -3   33.20    2.90
 -11   7   3   42.60    2.70
  11   7  -3   31.00    4.00
  10  -7  -3    4.00    1.50
 -10   7   3    2.10    2.90
  10   7  -3    4.10    1.50
  10   7  -3    0.90    1.80
   9  -7  -3   38.50    2.80
  -9  -7   3   43.60    4.90
  -9  -7   3   39.70    3.40
   9   7  -3   36.00    4.10
  -9   7   3   42.60    4.00
   8  -7  -3    4.00    1.90
  -8  -7   3    0.70    2.20
  -8   7   3    1.60    1.90
  -8   7   3    6.30    2.80
   8   7  -3    3.20    2.10
  -7  -7   3   19.80    3.00
  -7   7   3   19.60    2.90
  -7   7   3   19.70    3.70
   6  -7  -3  462.05   12.50
  -6  -7   3  478.35   13.60
  -6   7   3  464.45   14.40
  -6   7   3  471.55   14.00
  -5  -7   3   16.40    2.60
   5  -7  -3   14.70    2.20
  -5   7   3   17.40    2.80
  -5   7   3   21.30    3.30
  -4  -7   3   12.00    2.10
   4  -7  -3    7.10    2.10
  -4   7   3    7.60    2.40
  -4   7   3    4.20    2.40
  -3  -7   3  155.78    5.80
   3  -7  -3  152.58    5.70
   3   7  -3  146.19    6.50
  -3   7   3  154.58    6.40
  -3   7   3  134.79    6.60
  -2  -7   3  767.42   19.90
   2  -7  -3  718.63   17.90
   2   7  -3  716.23   18.90
   2   7  -3  733.13   18.40
  -2   7   3  672.53   18.80
   1  -7  -3 1124.39   27.20
  -1  -7   3 1178.08   27.60
   1   7  -3 1107.59   27.80
  -1   7   3 1142.79   28.50
   1   7  -3 1146.79   27.70
  -1   7   3 1161.98   28.40
   0  -7   3   -1.60    9.10
   0  -7  -3    4.20    2.70
   0   7   3    1.80    1.90
   0   7  -3   -0.30    1.60
   0   7  -3    0.60    2.10
  -1  -7  -3   12.60    3.10
   1  -7   3   11.50    7.60
   1   7   3   10.40    3.10
  -1   7  -3    7.50    2.50
   1   7   3   12.20    2.50
  -2  -7  -3 1315.57   31.60
   2  -7   3 1293.47   53.39
   2  -7   3 1337.37   31.20
  -2   7  -3 1386.66   32.20
  -2   7  -3 1260.87   33.10
   2   7   3 1336.67   32.00
  -2   7  -3 1342.87   31.80
  -3  -7  -3   14.80    3.40
   3  -7   3   18.70    2.60
   3   7   3   10.60    2.50
  -3   7  -3   14.80    3.00
   3   7   3   15.40    2.60
   3   7   3   10.70    2.60
  -3   7  -3   12.80    2.30
   4  -7   3  308.47    8.80
  -4  -7  -3  288.77   10.00
  -4  -7  -3  304.67    9.50
   4   7   3  297.57    9.70
   4   7   3  297.27    9.40
   4   7   3  291.97   10.20
  -4   7  -3  290.57    9.90
  -4   7  -3  303.67    9.40
  -5  -7  -3    1.60    2.00
   5  -7   3   -0.20    1.40
  -5  -7  -3   -0.80    3.00
  -5   7  -3    1.10    2.10
   5   7   3    2.80    2.50
   5   7   3    4.70    2.00
   6  -7   3  683.43   17.20
  -6  -7  -3  664.93   17.50
  -6  -7  -3  677.03   18.00
   6   7   3  690.03   17.80
  -6   7  -3  639.54   17.90
  -6   7  -3  666.63   17.80
   6   7   3  660.53   17.90
   7  -7   3   68.09    4.00
  -7  -7  -3   70.19    4.80
   7   7   3   63.39    4.90
   7   7   3   63.79    4.50
  -7   7  -3   53.89    5.40
  -8  -7  -3  298.67   11.20
   8  -7   3  297.87    8.60
  -8  -7  -3  268.07    8.60
   8   7   3  301.37    9.60
  -8   7  -3  278.37    9.70
   8   7   3  291.27    9.00
  -9  -7  -3  107.59    4.90
   9  -7   3  115.19    4.30
   9   7   3  112.99    4.80
  -9   7  -3  100.69    4.90
  10  -7   3    6.20    1.30
  10   7   3    6.20    1.90
  10   7   3    8.30    1.50
  11  -7   3   96.19    3.60
  11   7   3   94.89    3.90
  11  -8  -3   10.00    1.80
 -11  -8   3    6.80    1.30
  11   8  -3    6.00    1.40
  11   8  -3    9.50    2.10
  10  -8  -3   97.39    4.20
 -10  -8   3  100.49    4.60
 -10   8   3  121.79    4.60
  10   8  -3   99.99    4.20
  10   8  -3  102.19    4.40
   9  -8  -3   -0.90    1.60
  -9  -8   3    0.80    2.50
  -9  -8   3    2.80    1.70
   9   8  -3    0.20    1.50
   9   8  -3    0.90    2.30
   8  -8  -3  104.79    4.40
  -8  -8   3  109.79    5.10
  -8   8   3  115.99    5.60
   8   8  -3  122.19    5.60
  -8   8   3  115.19    5.70
   7  -8  -3    7.10    2.50
  -7  -8   3    5.20    2.50
   7   8  -3    5.40    2.10
  -7   8   3    3.40    2.30
  -7   8   3    6.30    2.40
   6  -8  -3  220.98    7.30
  -6  -8   3  215.88    8.20
  -6   8   3  226.48    8.20
  -6   8   3  219.48    9.00
  -5  -8   3   14.40    2.50
   5  -8  -3   20.20    3.30
  -5   8   3   15.40    3.30
   5   8  -3   19.80    4.20
   4  -8  -3 3402.16   76.49
  -4  -8   3 3357.46   77.39
   4   8  -3 3450.25   77.39
  -4   8   3 3404.76   77.89
  -4   8   3 3283.97   78.29
   3  -8  -3    8.00    2.30
  -3  -8   3   12.30    2.20
  -3   8   3   12.30    2.70
   3   8  -3   14.00    2.70
  -3   8   3   10.40    2.80
  -2  -8   3 1868.21   43.60
   2  -8  -3 1821.62   43.00
  -2   8   3 1887.51   44.20
  -2   8   3 1877.51   43.90
   2   8  -3 1821.32   43.70
   1  -8  -3  157.58    6.90
  -1  -8   3  163.88    6.20
   1   8  -3  164.78    6.50
  -1   8   3  165.18    6.90
  -1   8   3  169.58    7.10
   0  -8   3  736.83   19.00
   0   8   3  785.12   20.00
   0   8  -3  764.32   19.60
   0   8   3  758.52   19.90
   0   8   3  742.03   19.90
   1  -8   3   80.69    4.10
  -1  -8  -3   81.09    5.90
   1   8   3   84.19    5.60
  -1   8  -3   79.59    4.60
   1   8   3   80.99    5.10
  -2  -8  -3  254.17    9.20
   2  -8   3  259.57    8.00
  -2   8  -3  253.97    8.60
   2   8   3  250.87    8.90
  -2   8  -3  270.37    9.00
   2   8   3  267.77    9.10
  -3  -8  -3  196.78    8.30
   3  -8   3  192.98    6.50
   3   8   3  189.68    7.40
  -3   8  -3  199.38    7.40
   3   8   3  169.18    9.50
   3   8   3  181.58    7.60
  -3   8  -3  204.28    7.80
   4  -8   3  227.88    7.40
  -4  -8  -3  225.68    8.00
  -4  -8  -3  222.78    8.90
  -4   8  -3  230.58    8.20
   4   8   3  220.58    8.00
  -4   8  -3  232.48    8.50
   4   8   3  228.98    8.30
   4   8   3  229.58    8.90
  -5  -8  -3    4.40    2.20
  -5  -8  -3    1.80    3.20
   5  -8   3    4.70    1.80
   5   8   3    5.40    2.40
   5   8   3    6.60    4.80
  -5   8  -3    3.80    2.50
   5   8   3    4.10    2.20
  -5   8  -3    3.90    2.50
  -6  -8  -3  229.48    9.30
  -6  -8  -3  215.28    8.00
   6  -8   3  240.88    7.70
  -6   8  -3  219.88    8.30
   6   8   3  229.08    8.30
   6   8   3  234.38    8.10
  -6   8  -3  221.88    8.40
   7  -8   3   47.90    3.00
  -7  -8  -3   42.90    3.50
  -7  -8  -3   46.30    6.40
   7   8   3   40.70    3.40
   7   8   3   43.40    4.20
  -7   8  -3   40.20    4.50
   8  -8   3  528.25   14.00
  -8  -8  -3  562.04   18.20
  -8  -8  -3  526.25   14.10
   8   8   3  549.65   14.90
   8   8   3  539.05   14.40
   9  -8   3    0.60    1.20
   9   8   3    2.10    1.60
  -9   8  -3    5.40    1.80
   9   8   3    3.10    1.60
  10   8   3  122.49    5.00
  10   8   3  122.99    4.50
  10  -9  -3    0.60    2.20
 -10  -9   3    1.30    1.40
  10   9  -3    2.10    1.40
  10   9  -3    1.50    1.40
  -9  -9   3   86.69    4.20
  -9  -9   3   78.39    4.00
   9   9  -3   85.29    3.70
   9   9  -3   81.19    3.80
   8  -9  -3  183.98    6.00
  -8  -9   3  191.48    6.60
   8   9  -3  187.98    7.20
  -8   9   3  185.88    5.80
  -7  -9   3    5.50    1.80
  -7   9   3    3.60    2.10
   7   9  -3    5.00    2.00
   6  -9  -3  249.18    7.70
  -6  -9   3  243.78    8.50
  -6   9   3  253.47    8.80
   6   9  -3  261.57    8.80
  -6   9   3  256.77    8.20
  -6   9   3  292.27    9.90
   5  -9  -3  542.95   14.80
  -5  -9   3  563.54   15.80
   5   9  -3  552.24   16.40
  -5   9   3  579.94   16.30
  -5   9   3  589.74   16.10
   4  -9  -3  284.97    9.00
  -4  -9   3  280.77    9.50
   4   9  -3  275.97    9.80
  -4   9   3  284.77   10.00
  -4   9   3  289.17    9.90
  -3  -9   3  203.08    7.50
   3  -9  -3  190.78    7.30
   3   9  -3  204.08    7.90
  -3   9   3  208.88    8.20
  -3   9   3  198.18    8.10
  -2  -9   3  129.29    5.80
   2  -9  -3  130.39    6.10
  -2   9   3  134.39    6.70
  -2   9   3  126.79    6.40
   2   9  -3  127.89    6.10
  -1  -9   3    0.60    1.80
   1  -9  -3    2.20    2.90
  -1   9   3   -4.10    2.30
   1   9  -3   -0.30    2.00
   0  -9  -3  139.19    7.00
   0  -9   3  146.19    5.90
   0   9   3  144.39    6.80
   0   9   3  133.29   10.80
   0   9  -3  146.99    6.40
  -1  -9  -3   55.79    5.70
   1  -9   3   63.49    4.00
  -1   9  -3   58.39    4.50
   1   9   3   58.39    4.90
   1   9   3   56.09    5.00
  -2  -9  -3   70.99    9.10
   2  -9   3   80.19    4.40
  -2   9  -3   77.89    5.00
   2   9   3   86.79    5.50
   2   9   3   83.99    5.30
  -3  -9  -3  142.99    7.30
   3  -9   3  148.09    5.80
   3   9   3  147.09    7.00
  -3   9  -3  148.59    6.60
  -3   9  -3  151.98    6.80
   3   9   3  150.78    6.70
   4  -9   3  174.68    6.40
  -4  -9  -3  172.68    6.90
   4   9   3  169.48    8.00
   4   9   3  177.58    7.10
  -4   9  -3  176.98    7.30
   4   9   3  161.18    7.20
  -4   9  -3  177.48    7.30
  -5  -9  -3    9.00    1.90
   5  -9   3    8.70    2.10
   5   9   3   10.00    2.20
  -5   9  -3   12.40    2.20
   5   9   3   17.50    2.70
  -5   9  -3   10.40    2.60
  -6  -9  -3   54.59    3.80
   6  -9   3   55.19    3.10
  -6   9  -3   51.09    4.20
  -6   9  -3   55.39    4.50
   6   9   3   53.59    3.60
   6   9   3   55.09    4.50
  -7  -9  -3   20.90    3.10
   7  -9   3   20.80    2.20
  -7   9  -3   21.90    2.80
   7   9   3   19.60    3.00
   7   9   3   22.10    3.60
   8  -9   3  234.98    6.90
  -8   9  -3  227.68    7.00
   8   9   3  221.48    7.10
   8   9   3  224.68    7.00
   9  -9   3   -0.70    1.30
   9   9   3    0.50    1.30
   9   9   3   -1.00    1.60
  -9 -10   3   20.10    2.30
  -9  10   3   15.60    2.10
   9  10  -3   23.50    2.10
   9  10  -3   21.80    2.70
  -8 -10   3   15.40    1.90
  -8 -10   3   16.90    2.50
  -8  10   3   12.00    1.80
   8  10  -3   13.20    1.70
   8  10  -3    9.50    1.40
  -8  10   3   20.30    2.40
  -7 -10   3    1.00    1.60
   7 -10  -3    1.60    2.20
   7  10  -3   -0.40    1.40
  -7  10   3   -2.50    1.50
  -7  10   3    0.20    1.30
   7  10  -3    0.70    1.70
  -6 -10   3  202.28    7.20
   6 -10  -3  208.68    6.80
   6  10  -3  219.98    7.70
  -6  10   3  222.68    7.10
  -6  10   3  205.78    8.10
  -6  10   3  205.98    7.50
   5 -10  -3   27.40    3.60
  -5 -10   3   28.30    3.20
  -5  10   3   26.70    3.60
   5  10  -3   33.90    3.70
   4 -10  -3   31.60    3.90
  -4 -10   3   38.40    3.30
   4  10  -3   27.80    4.20
   4  10  -3   32.30    3.80
  -4  10   3   38.00    3.70
  -4  10   3   29.40    3.50
   3 -10  -3  200.98    7.00
  -3  10   3  179.68    7.50
   3  10  -3  188.18    7.20
   3  10  -3  178.58   10.20
   2 -10  -3   24.00    3.90
  -2 -10   3   25.90    3.90
  -2  10   3   19.70    3.00
  -2  10   3   24.00    3.50
   2  10  -3   25.40    4.30
   2  10  -3   27.60    3.80
  -1 -10   3    5.60    2.00
  -1  10   3    7.90    2.80
   1  10  -3   10.00    2.40
   1  10  -3    9.30    2.60
   0 -10   3  829.92   21.00
   0  10  -3  824.22   21.60
   0  10   3  848.42   22.00
   0  10  -3  800.72   20.80
   0  10   3  802.52   21.10
   1 -10   3   69.69    4.40
   1  10   3   58.69    5.10
  -1  10  -3   60.99    4.90
   1  10   3   60.59    5.40
   2 -10   3    8.20    2.60
   2  10   3    5.50    4.40
  -2  10  -3    8.20    2.90
   2  10   3    8.90    2.40
  -3 -10  -3  213.98    7.30
   3 -10   3  215.98    7.10
  -3  10  -3  216.08    7.70
   3  10   3  226.28    8.00
   3  10   3  217.08    7.80
   3  10   3  226.88    8.00
   4 -10   3  131.19    4.90
  -4 -10  -3  118.89    5.00
   4  10   3  134.09    5.90
   4  10   3  125.19    6.00
  -4  10  -3  126.89    5.50
   5 -10   3   32.10    2.50
  -5 -10  -3   33.00    3.60
  -5  10  -3   33.00    3.40
   5  10   3   32.40    3.90
   6 -10   3  151.88    5.30
   6  10   3  162.88    5.80
  -6  10  -3  143.49    6.00
   6  10   3  155.48    5.80
  -7 -10  -3    7.70    4.60
   7 -10   3   18.40    2.10
   7  10   3   14.00    2.30
   7  10   3   16.10    2.20
   8 -10   3   53.79    2.80
   8  10   3   54.19    2.80
   8  10   3   46.20    3.70
  -8 -11   3  280.17    7.90
  -8  11   3  256.37    6.80
   8  11  -3  281.87    7.50
  -8  11   3  271.47    7.50
  -7 -11   3   91.19    4.00
   7  11  -3   88.39    3.60
  -7  11   3   90.09    3.10
  -7  11   3   82.19    3.60
  -6 -11   3   32.70    3.00
  -6  11   3   32.60    4.70
  -6  11   3   26.90    2.40
   6  11  -3   29.50    3.20
   6  11  -3   31.00    2.40
  -6  11   3   34.30    2.20
  -5 -11   3    1.70    1.60
  -5  11   3    0.90    1.20
  -5  11   3    4.10    2.10
   5  11  -3    3.10    1.30
  -4 -11   3  241.98    7.90
   4  11  -3  244.38    8.30
  -4  11   3  256.07    8.40
   4  11  -3  263.27    8.70
  -3 -11   3    0.60    1.60
   3  11  -3   -2.80    2.10
   3  11  -3    1.40    2.10
  -3  11   3    1.80    1.90
  -2 -11   3  550.84   14.90
   2  11  -3  563.74   15.30
  -2  11   3  553.04   15.50
   2  11  -3  561.14   14.90
  -1 -11   3  417.66   11.80
  -1  11   3  411.46   12.40
   1  11  -3  426.86   11.90
   1  11  -3  410.76   12.10
   0 -11   3  211.38    7.00
   0  11  -3  211.48    7.40
   0  11   3  194.88    9.60
   0  11   3  210.88    7.60
   1 -11   3  100.99    4.40
  -1  11  -3   94.59    4.80
   1  11   3   98.89    5.10
   1  11   3  102.09    5.70
   2 -11   3    1.10    1.40
  -2 -11  -3    3.70    2.00
   2  11   3    3.50    2.20
  -2  11  -3    2.10    1.80
   2  11   3    3.20    2.10
   3 -11   3   18.80    2.50
  -3 -11  -3   24.30    3.40
   3  11   3   20.70    2.40
   3  11   3   20.80    2.70
  -3  11  -3   16.90    2.20
   4 -11   3  100.49    4.10
   4  11   3   98.39    4.30
  -4  11  -3   96.99    4.60
   4  11   3  105.29    5.60
   5 -11   3  234.28    7.10
  -5  11  -3  238.68    7.60
   5  11   3  235.88    7.30
   6 -11   3   71.69    3.20
  -6 -11  -3   65.79    6.20
   6  11   3   74.59    3.30
  -6  11  -3   61.49    4.70
   7 -11   3   13.60    2.20
   7  11   3    8.90    1.30
  -6 -12   3    7.20    1.70
   6  12  -3    3.90    1.10
  -6  12   3    5.80    1.00
  -5 -12   3    2.90    1.70
  -5  12   3    2.70    1.00
   5  12  -3    1.80    1.10
  -5  12   3    3.30    2.20
  -4 -12   3   49.30    3.30
   4  12  -3   45.60    5.40
  -4  12   3   49.30    3.40
  -4  12   3   51.29    2.50
   4  12  -3   50.79    2.70
  -3 -12   3   28.90    3.00
   3  12  -3   38.10    3.80
   3  12  -3   31.20    2.50
  -3  12   3   32.50    2.10
  -3  12   3   28.00    3.00
  -2 -12   3    1.10    1.60
  -2  12   3    0.70    1.70
   2  12  -3    0.80    1.60
   2  12  -3    5.50    1.90
  -2  12   3    1.50    1.10
  -1 -12   3   86.59    4.10
  -1  12   3   87.69    3.50
   1  12  -3   84.79    4.20
  -1  12   3   95.29    4.50
   1  12  -3   92.39    4.40
   0 -12   3 1120.59   27.20
   0  12   3 1141.89   26.60
   0  12  -3 1140.89   27.70
   0  12   3 1117.69   27.80
   1 -12   3  353.66   10.10
   1  12   3  369.96    9.60
   1  12   3  366.46    9.90
   1  12   3  368.76   10.70
  -1  12  -3  367.36   10.60
   2 -12   3   10.90    1.60
   2  12   3   12.40    2.30
   2  12   3    9.20    1.70
  -2  12  -3   10.00    1.80
   2  12   3    9.40    1.60
   3 -12   3   89.89    3.80
   3  12   3   91.19    3.70
  -3  12  -3   90.99    4.20
   3  12   3   85.69    4.80
   4 -12   3   70.19    3.40
  -4  12  -3   69.39    3.80
   4  12   3   67.09    3.10
  -5 -12  -3   -0.60    2.90
   5 -12   3    0.90    1.40
   5  12   3    1.80    1.10
  -5  12  -3    6.30    2.20
  -3 -13   3    2.50    1.80
  -3  13   3    1.20    0.80
   3  13  -3    3.00    1.60
  -3  13   3   -0.80    1.80
  -2 -13   3  160.58    5.30
   2  13  -3  157.08    5.60
  -2  13   3  162.18    4.70
  -2  13   3  159.58    5.50
  -1 -13   3   17.80    2.90
  -1  13   3   15.60    1.60
   1  13  -3   20.30    3.00
  -1  13   3   15.90    2.70
   0 -13   3  434.76   11.20
   0  13   3  427.36   10.60
   0  13  -3  427.36   11.40
   0  13   3  427.76   11.50
   1 -13   3  113.59    4.20
   1  13   3  110.79    4.60
   1  13   3  111.49    3.50
  -1  13  -3  110.89    4.40
   2 -13   3   42.70    2.90
   2  13   3   30.60    3.80
  -2  13  -3   39.60    2.90
 -14   0   4  357.66    9.30
 -14   0   4  357.66    9.60
 -13   0   4    0.30    1.30
 -13   0   4   -1.10    1.30
 -12   0   4 1209.48   29.40
 -12   0   4 1220.88   30.10
 -11   0   4    2.40    2.10
 -11   0   4   -0.20    2.10
 -10   0   4  360.26   11.00
 -10   0   4  369.36   11.70
  -9   0   4    0.20    2.50
  -9   0   4   -1.60    2.30
  -9   0   4   -0.80    2.40
  -8   0   4   -2.20    2.50
  -8   0   4    0.70    2.50
  -8   0   4    2.80    2.50
   7   0  -4   -1.70    1.80
   6   0  -4   92.59    3.30
   6   0  -4   79.89    3.70
   5   0  -4    1.50    0.70
   5   0  -4   -0.20    0.80
   4   0  -4 3254.37   71.99
   4   0  -4 3154.78   71.79
   4   0  -4 3190.38   83.09
   3   0  -4    0.60    1.30
   3   0  -4    0.30    0.50
   3   0  -4    0.50    0.40
   2   0  -4  209.78    5.90
   2   0  -4  198.38    8.30
  -1   0   4    1.60    1.20
   1   0  -4    1.30    0.50
   0   0  -4  433.56   10.60
   0   0   4  427.56   14.50
   0   0  -4  440.96   15.50
   1   0   4    0.10    2.10
  -1   0  -4   -0.30    0.60
  -3   0  -4    2.70    1.10
   3   0   4    2.10    0.70
   3   0   4    1.20    4.80
   4   0   4  474.55   31.70
  -5   0  -4   -0.60    1.60
   5   0   4    2.70    1.80
  -5   0  -4    0.60    1.50
   6   0   4   78.29    4.10
   6   0   4   65.39    4.10
  -6   0  -4   78.79    3.90
  -7   0  -4    3.30    1.50
  -7   0  -4   -0.50    2.60
  -8   0  -4  826.32   21.00
  -8   0  -4  828.02   20.90
   8   0   4  809.92   20.70
   9   0   4    0.20    2.00
  -9   0  -4   -2.00    2.10
  -9   0  -4   -1.90    1.60
 -10   0  -4  440.66   12.60
  10   0   4  439.06   13.30
 -10   0  -4  458.05   13.10
 -11   0  -4    2.20    2.00
 -11   0  -4   -0.40    1.40
  11   0   4   -0.40    2.30
 -12   0  -4   50.79    3.10
 -12   0  -4   54.09    3.00
 -13   0  -4    2.10    1.40
 -14  -1   4    5.60    1.30
 -14  -1   4    3.60    1.10
 -14   1   4    4.30    1.20
 -14   1   4    4.90    1.10
 -13  -1   4   68.69    3.50
 -13  -1   4   62.99    3.20
 -13   1   4   61.99    3.20
 -13   1   4   67.29    3.50
 -12  -1   4 2604.94   60.19
 -12  -1   4 2536.55   59.29
 -12   1   4 2563.84   59.99
 -12   1   4 2600.84   59.39
 -11  -1   4  365.06   11.10
 -11  -1   4  373.26   11.90
 -11   1   4  371.96   11.80
 -11   1   4  379.96   11.20
 -10  -1   4    4.80    2.40
 -10  -1   4    4.50    2.20
 -10   1   4    5.10    2.40
 -10   1   4    3.20    2.20
 -10   1   4    4.20    2.40
  -9  -1   4   12.70    2.80
  -9  -1   4    7.30    2.60
  -9   1   4    7.60    2.80
  -9   1   4   11.10    2.60
  -8  -1   4 2557.64   59.69
  -8  -1   4 2632.34   60.69
  -8   1   4 2601.64   59.49
  -8   1   4 2566.44   60.39
  -8   1   4 2622.04   59.69
   7  -1  -4   59.49   13.60
   7  -1  -4   62.99    4.00
   7   1  -4   63.19    4.50
  -7   1   4   62.79    4.10
   6  -1  -4  134.89    4.50
   6  -1  -4  121.59   13.60
  -6  -1   4  116.99    5.10
   6   1  -4  121.39    4.90
   6   1  -4  123.29   20.40
   6   1  -4  122.79    4.40
   5  -1  -4 1282.57   29.80
   5  -1  -4 1309.77   45.20
   5  -1  -4 1328.27   30.10
   5   1  -4 1223.78   31.40
   5   1  -4 1371.86   45.80
   5   1  -4 1287.57   30.40
   4  -1  -4 4804.12  107.59
   4  -1  -4 4872.01  122.19
   4  -1  -4 4857.31  107.89
   4   1  -4 4686.93  108.19
   4   1  -4 4872.21  108.09
   4   1  -4 4918.11  119.49
   3  -1  -4  179.98    5.30
   3  -1  -4  176.88   10.40
  -3  -1   4  175.68    5.60
   3  -1  -4  174.28    4.70
   3   1  -4  175.68    5.30
   3   1  -4  180.68    5.10
   3   1  -4  180.88    8.90
   2  -1  -4 2814.12   70.49
   2   1  -4 2777.22   63.09
   1  -1  -4  109.59    6.80
   1   1  -4  107.99    3.70
  -1   1   4  107.19    7.30
   0  -1  -4 2250.87   48.60
   0   1   4 2079.29   56.09
   0   1  -4 2175.68   49.30
  -1  -1  -4  793.42   17.90
  -1  -1  -4  656.43   26.90
  -1   1  -4  798.92   18.50
  -1   1  -4  812.22   18.10
  -2  -1  -4    1.40    0.80
   2   1   4    3.10    0.60
   2   1   4    2.30    3.90
  -2   1  -4    3.30    0.90
  -2   1  -4    3.20    0.60
  -3  -1  -4  489.85   12.80
   3  -1   4  538.25   26.20
   3   1   4  499.95   12.60
  -3   1  -4  493.95   12.90
  -3   1  -4  493.15   12.60
  -4  -1  -4   59.39    3.70
   4  -1   4   55.59   14.70
   4   1   4   54.49    2.70
  -4   1  -4   57.29    2.50
  -5  -1  -4 1063.89   25.80
   5  -1   4 1077.79   26.30
  -5  -1  -4 1120.09   26.60
   5  -1   4 1053.09   25.80
   5   1   4 1085.19   25.80
   5   1   4 1079.59   26.30
  -5   1  -4 1100.99   25.90
  -5   1  -4 1106.49   25.60
  -6  -1  -4  624.44   15.60
   6  -1   4  608.64   15.50
   6  -1   4  586.74   16.10
  -6   1  -4  607.24   15.60
   6   1   4  602.54   15.50
   6   1   4  591.24   16.30
  -7  -1  -4   59.89    3.80
  -7  -1  -4   78.69    5.80
   7  -1   4   63.99    4.40
  -7   1  -4   48.80    4.70
  -7   1  -4   62.29    3.80
   7   1   4   57.99    3.90
   8  -1   4  416.96   12.00
  -8  -1  -4  430.16   12.20
  -8  -1  -4  427.76   12.30
  -8   1  -4  422.16   12.10
   8   1   4  422.36   12.10
  -8   1  -4  419.06   12.10
   9  -1   4   20.00    3.10
  -9  -1  -4   23.20    3.10
  -9  -1  -4   24.40    3.40
  -9   1  -4   21.30    3.30
   9   1   4   23.20    3.80
  -9   1  -4   24.40    3.70
 -10  -1  -4   22.80    3.00
 -10  -1  -4   21.30    3.90
 -10   1  -4   22.60    3.60
 -10   1  -4   22.60    3.40
 -11  -1  -4    8.70    2.30
 -11  -1  -4    7.20    1.40
  11   1   4    8.40    2.00
 -11   1  -4    7.50    1.60
 -11   1  -4    8.80    2.00
 -12  -1  -4  248.58    7.60
 -12  -1  -4  248.38    7.20
 -12   1  -4  245.48    7.70
 -12   1  -4  243.98    7.30
 -13  -1  -4   13.40    2.50
 -13   1  -4   11.10    1.60
 -14  -2   4   22.00    2.10
 -14  -2   4   24.60    1.90
 -14   2   4   23.60    2.00
 -14   2   4   20.30    1.80
 -13  -2   4   53.69    3.20
 -13  -2   4   51.09    2.90
 -13   2   4   49.99    3.00
 -13   2   4   54.59    2.80
 -12  -2   4  136.29    6.40
 -12  -2   4  128.09    5.60
 -12   2   4  129.99    5.60
  12   2  -4  134.99    5.90
 -12   2   4  129.29    6.00
 -11  -2   4  399.96   12.40
 -11  -2   4  386.36   11.50
  11   2  -4  388.06   11.30
 -11   2   4  388.66   12.00
 -11   2   4  394.06   11.50
 -10  -2   4  901.81   22.90
 -10  -2   4  928.01   24.00
 -10   2   4  914.61   23.60
 -10   2   4  905.01   22.80
 -10   2   4  888.01   22.70
  -9  -2   4  205.48    8.40
  -9  -2   4  190.38    7.50
  -9   2   4  204.38    7.50
  -9   2   4  202.48    7.20
  -9   2   4  206.08    8.10
  -8  -2   4   -0.60    2.60
  -8  -2   4    1.70    2.20
  -8   2   4    3.80    2.50
  -8   2   4    0.30    2.60
   7  -2  -4   94.39   16.30
  -7  -2   4  106.39    4.80
  -7  -2   4   95.49   10.60
  -7   2   4  101.59    9.90
   7   2  -4   96.79    5.50
  -7   2   4   96.89    4.60
  -6  -2   4  285.07   10.10
  -6  -2   4  301.67    8.90
   6  -2  -4  311.07    8.20
   6  -2  -4  299.97   21.90
  -6   2   4  293.37    8.70
   6   2  -4  301.77    9.00
   6   2  -4  308.77    9.10
  -5  -2   4 2512.65   58.39
   5  -2  -4 2463.45   56.59
   5  -2  -4 2478.35   56.59
   5  -2  -4 2486.75   75.99
   5   2  -4 2533.65   57.79
   5   2  -4 2654.83   57.89
   4  -2  -4   80.89    2.60
  -4  -2   4   78.29    4.20
   4  -2  -4   81.19    8.90
   4  -2  -4   81.09    3.00
   4   2  -4   79.89    3.40
   4   2  -4   82.99    3.30
  -3  -2   4  143.49    5.30
   3  -2  -4  147.69    3.80
   3  -2  -4  145.19   10.60
   3   2  -4  145.59    4.90
   3   2  -4  158.58    7.30
   3   2  -4  146.79    4.60
  -2  -2   4 6817.62  152.28
   1  -2  -4 2665.13   70.79
  -1  -2   4 2737.53   61.79
   1  -2  -4 2676.83   60.29
   1   2  -4 2810.02   61.59
  -1   2   4 2677.93   72.09
   0  -2  -4  337.67    7.90
   0  -2   4  318.07    8.90
   0   2   4  319.07   15.70
   0   2  -4  313.57    8.60
  -1  -2  -4  567.24   13.50
   1   2   4  567.04   23.10
  -1   2  -4  558.94   14.00
   1   2   4  558.64   13.40
  -1   2  -4  570.64   13.90
  -2  -2  -4 2766.22   82.49
  -2  -2  -4 2823.02   64.89
   2   2   4 2910.21   64.79
   2   2   4 3005.30   81.69
  -2   2  -4 2975.30   65.19
  -2   2  -4 2819.92   65.09
  -3  -2  -4  966.40   23.40
  -3  -2  -4  961.70   22.80
   3   2   4  953.20   22.50
  -3   2  -4  977.80   22.90
   3   2   4  851.31   40.60
  -3   2  -4  986.80   22.60
  -4  -2  -4  775.22   20.00
  -4  -2  -4  765.92   19.00
  -4   2  -4  798.02   18.80
   4   2   4  784.32   19.20
  -5  -2  -4 1052.79   24.90
   5  -2   4 1012.20   24.80
   5   2   4 1019.90   24.90
  -5   2  -4 1062.99   24.30
  -5   2  -4 1038.50   24.90
   5   2   4 1049.79   25.50
   6  -2   4 1994.50   47.60
  -6  -2  -4 2076.19   47.90
  -6   2  -4 2093.99   47.90
  -6   2  -4 2159.38   49.60
   6   2   4 2030.00   47.80
  -7  -2  -4   41.60    3.40
  -7  -2  -4   39.70    6.10
   7   2   4   38.80    3.60
  -7   2  -4   44.00    3.50
  -7   2  -4   43.80    4.30
  -8  -2  -4  273.57    8.90
   8  -2   4  249.68    9.10
  -8  -2  -4  278.57    9.50
  -8   2  -4  275.37    8.90
  -8   2  -4  284.27    9.00
   8   2   4  285.07    8.90
  -9  -2  -4   30.00    3.60
  -9  -2  -4   33.00    4.80
   9   2   4   32.90    4.00
  -9   2  -4   36.00    4.00
  -9   2  -4   35.90    3.60
 -10  -2  -4 1369.96   32.50
 -10  -2  -4 1317.87   33.20
 -10   2  -4 1392.06   34.10
 -10   2  -4 1363.26   32.70
  10   2   4 1343.87   32.90
 -11  -2  -4   51.59    3.30
 -11   2  -4   48.80    3.20
 -11   2  -4   48.40    3.90
  11   2   4   51.59    3.50
 -12  -2  -4  226.78    7.00
 -12  -2  -4  211.48    6.40
 -12   2  -4  225.98    7.10
 -13  -2  -4    5.30    1.70
 -13   2  -4    8.80    1.40
 -14  -3   4   48.60    2.90
 -14   3   4   45.80    2.20
 -14   3   4   47.40    2.30
 -13  -3   4   96.39    3.80
 -13  -3   4  100.19    4.20
 -13   3   4  103.79    3.70
 -13   3   4   96.39    4.00
  12   3  -4  503.95   13.50
 -12   3   4  502.75   13.50
 -11  -3   4   61.29    5.00
 -11  -3   4   57.89    4.30
 -11   3   4   58.89    4.20
 -11   3   4   58.39    4.60
  11   3  -4   57.49    3.90
 -10  -3   4  144.59    7.20
 -10  -3   4  143.19    6.30
 -10   3   4  150.08    6.30
 -10   3   4  150.78    6.70
  -9  -3   4   22.90    3.20
  -9  -3   4   19.60    3.50
  -9   3   4   22.00    4.00
  -9   3   4   22.30    3.40
  -8  -3   4 1707.23   40.50
  -8  -3   4 1710.03   40.70
  -8  -3   4 1699.73   41.70
  -8   3   4 1720.83   40.40
  -8   3   4 1738.13   40.50
  -8   3   4 1737.63   41.10
  -7  -3   4  137.39    7.10
  -7  -3   4  144.29    6.60
  -7   3   4  139.79    5.50
  -7   3   4  135.09    6.80
  -6  -3   4  134.69    5.40
   6  -3  -4  134.19   16.30
   6   3  -4  137.49    5.80
   6   3  -4  128.99    5.70
  -6   3   4  130.19    5.10
   5  -3  -4   47.00    3.10
   5  -3  -4   48.70    1.80
   5  -3  -4   48.90    9.50
  -5  -3   4   45.20    3.60
   5  -3  -4   50.19    2.40
   5   3  -4   52.59    3.20
   5   3  -4   48.90   11.90
   5   3  -4   47.70    3.20
   4  -3  -4  103.49    4.20
  -4  -3   4   96.39    5.50
   4  -3  -4  103.29   10.90
   4   3  -4  104.49    8.80
   4   3  -4  106.59    4.10
   3  -3  -4  636.94   27.30
  -3  -3   4  620.94   16.80
   3  -3  -4  644.64   15.80
   3   3  -4  624.04   16.20
   3   3  -4  632.64   15.70
   3   3  -4  637.94   19.40
  -2  -3   4  970.60   24.10
   2  -3  -4 1004.20   35.00
  -2   3   4  956.30   37.00
   2   3  -4  981.90   23.70
   1  -3  -4  567.54   13.10
  -1  -3   4  552.74   15.00
   1  -3  -4  602.94   24.40
  -1   3   4  561.74   25.50
   1   3  -4  595.14   14.70
   0  -3  -4   25.70    5.90
   0  -3  -4   25.30    1.40
   0  -3   4   29.80    2.70
   0  -3   4   25.70    2.90
   0   3   4   23.80    7.00
   1  -3   4   67.09    5.80
  -1  -3  -4   65.69    2.70
   1  -3   4   79.19    3.70
   1   3   4   65.09    9.40
  -1   3  -4   65.29    2.90
   1   3   4   67.89    2.40
  -2  -3  -4  398.26   10.20
  -2  -3  -4  399.26   11.40
   2   3   4  397.56   22.70
  -2   3  -4  386.86   10.50
   2   3   4  387.26   10.00
  -2   3  -4  399.06   10.50
  -3  -3  -4  687.03   17.60
  -3  -3  -4  747.53   35.40
  -3   3  -4  735.73   17.40
   3   3   4  661.93   17.80
  -3   3  -4  696.23   17.80
  -4  -3  -4  593.34   14.80
  -4   3  -4  593.14   14.50
   4   3   4  577.54   14.90
  -4   3  -4  573.04   14.80
   4   3   4  571.74   14.80
   5  -3   4  442.66   13.00
  -5  -3  -4  493.35   12.80
  -5   3  -4  484.65   12.70
   5   3   4  472.95   13.20
   5   3   4  488.15   12.70
  -6   3  -4  358.26   11.90
  -6   3  -4  389.46   11.00
   6   3   4  356.66   11.80
  -7  -3  -4  588.34   15.70
   7   3   4  568.44   16.60
  -7   3  -4  605.04   15.70
  -7   3  -4  592.34   15.70
   7   3   4  594.64   15.70
  -8  -3  -4    1.90    1.80
  -8  -3  -4    1.00    3.80
  -8   3  -4    3.00    1.80
  -8   3  -4   -0.30    2.10
   8   3   4    2.50    1.90
  -9  -3  -4   28.50    3.90
  -9   3  -4   25.00    3.50
   9   3   4   20.70    2.90
  -9   3  -4   30.80    3.90
 -10  -3  -4    7.60    1.80
 -10  -3  -4    5.50    2.90
  10   3   4    6.40    1.60
 -10   3  -4    5.60    1.50
 -10   3  -4    4.20    2.10
 -11  -3  -4  656.43   16.40
 -11  -3  -4  642.04   17.00
 -11   3  -4  643.14   17.10
  11   3   4  653.13   17.00
 -11   3  -4  694.73   17.90
  12   3   4   64.19    3.90
 -12   3  -4   58.39    3.20
  13  -3   4   -2.00    1.50
 -13   3  -4   -0.30    1.20
 -13  -4   4   78.99    3.50
 -13  -4   4   75.59    3.20
 -13   4   4   80.29    3.10
 -13   4   4   82.29    3.40
  13   4  -4   74.39    4.10
 -12  -4   4  318.07    9.60
 -12  -4   4  294.67    8.60
 -12   4   4  303.47    9.20
 -12   4   4  300.97    8.50
  12   4  -4  312.07    9.10
 -11  -4   4  146.29    6.90
 -11  -4   4  145.19    6.00
  11   4  -4  142.19    5.70
 -11   4   4  147.39    6.40
 -11   4   4  154.28    6.00
 -10  -4   4   17.60    2.70
 -10  -4   4   16.70    3.00
 -10   4   4   12.00    2.40
 -10   4   4   10.60    2.70
  -9  -4   4   33.00    4.80
  -9  -4   4   34.10    4.10
  -9  -4   4   35.40    4.30
   9   4  -4   35.20    4.30
  -9   4   4   36.70    4.40
  -9   4   4   36.90    4.20
  -8  -4   4    8.80    2.20
  -8  -4   4    6.50    2.40
  -8  -4   4    6.20    2.90
  -8   4   4    6.50    2.40
  -8   4   4    9.40    3.10
  -7  -4   4 1178.98   28.60
  -7  -4   4 1190.78   28.70
  -7   4   4 1140.59   28.60
  -7   4   4 1189.88   29.00
  -6  -4   4  640.64   17.20
   6  -4  -4  750.22   50.49
   6   4  -4  619.64   18.40
  -5  -4   4  154.88    5.90
   5  -4  -4  145.89   16.30
   5   4  -4  156.18    6.20
   5   4  -4  145.89    6.00
   4  -4  -4 1123.19   26.60
  -4  -4   4 1052.49   26.30
   4  -4  -4 1142.49   45.20
   4   4  -4 1110.69   26.80
   4   4  -4 1094.79   36.90
   4   4  -4 1102.59   27.40
  -3  -4   4 2700.03   61.79
   3  -4  -4 2703.33   61.89
   3  -4  -4 2725.83   80.99
   3   4  -4 2660.93   68.89
   3   4  -4 2711.93   62.49
   3   4  -4 2729.13   61.79
   2  -4  -4   44.20    3.50
   2  -4  -4   44.90    7.40
  -2  -4   4   45.00    5.00
   2   4  -4   43.30    2.40
   2   4  -4   42.90    2.70
  -2   4   4   43.40   13.30
  -1  -4   4 1880.21   44.30
   1  -4  -4 1885.01   43.70
  -1   4   4 1822.82   61.89
   1   4  -4 1876.71   46.70
   0  -4   4 2738.63   62.59
   0  -4  -4 2669.83   60.19
   0  -4   4 2702.93   68.49
   0  -4  -4 2690.33   62.29
   0   4  -4 2765.82   61.99
   0   4   4 2646.84   80.89
   1  -4   4 1124.39   28.00
  -1  -4  -4 1118.79   26.20
   1  -4   4 1154.68   35.70
   1   4   4 1143.29   26.10
  -1   4  -4 1134.69   27.30
  -2  -4  -4  272.47    8.10
   2  -4   4  291.97   16.20
   2  -4   4  275.47    9.30
   2   4   4  283.17    7.60
  -2   4  -4  280.97    8.50
  -2   4  -4  283.67    8.20
  -3  -4  -4 2459.75   83.99
  -3   4  -4 2364.06   55.09
   3   4   4 2402.56   54.79
   3   4   4 2428.06   54.89
  -3   4  -4 2365.26   54.89
   4  -4   4  900.71   39.60
  -4  -4  -4  934.91   21.90
  -4   4  -4  881.11   21.80
  -4   4  -4  903.71   21.70
   4   4   4  886.81   21.80
   4   4   4  865.11   22.00
  -4   4  -4  887.61   21.80
  -5  -4  -4 3852.01   89.49
   5  -4   4 3880.01  119.19
   5   4   4 3877.91   90.49
  -5   4  -4 3969.20   89.49
  -5   4  -4 4493.25   91.59
   5   4   4 3805.82   89.49
  -5   4  -4 3881.01   89.49
  -6  -4  -4  345.27   10.30
   6   4   4  356.26   10.40
  -6   4  -4  364.96   10.70
   6   4   4  345.07   11.10
  -6   4  -4  356.86   10.30
  -7  -4  -4    2.20    1.80
  -7   4  -4    0.90    2.30
  -7   4  -4    2.00    1.60
   7   4   4    5.20    3.00
   7   4   4    1.50    1.70
  -8  -4  -4  230.18    8.10
   8   4   4  221.28    9.20
  -8   4  -4  228.18    8.00
  -8   4  -4  225.38    7.90
   8   4   4  231.68    8.10
  -9  -4  -4  138.79    6.30
   9   4   4  138.69    7.90
   9   4   4  146.09    6.40
  -9   4  -4  135.89    6.10
  -9   4  -4  135.59    6.00
 -10  -4  -4   16.50    2.70
  10   4   4   18.00    2.70
 -10   4  -4   21.20    2.50
 -10   4  -4   14.70    2.40
 -11  -4  -4   29.30    3.10
  11   4   4   32.90    2.90
 -11   4  -4   41.80    2.90
 -12  -4  -4   35.60    3.30
  12  -4   4   40.10    2.40
  12   4   4   37.30    2.80
 -13  -5   4   -1.10    1.90
  13  -5  -4   -1.10    1.60
 -13  -5   4    0.20    1.20
 -13   5   4    0.50    1.00
  13   5  -4    2.10    1.80
 -12  -5   4    6.50    1.50
 -12  -5   4    3.70    1.40
 -12   5   4    3.70    1.20
 -12   5   4    6.00    1.60
  12   5  -4    2.40    1.60
 -11  -5   4   -0.30    2.20
  11   5  -4    2.20    1.70
 -11   5   4    1.00    1.90
 -11   5   4   -0.90    1.80
 -10  -5   4  179.28    6.80
 -10  -5   4  176.98    7.80
 -10   5   4  168.78    7.00
 -10   5   4  160.78    6.70
  10   5  -4  172.98    7.80
  -9  -5   4   74.99    5.10
  -9  -5   4   77.19    5.70
  -9  -5   4   76.09    5.00
  -9   5   4   69.49    5.20
   9   5  -4   69.29    5.50
  -9   5   4   75.09    4.90
  -8  -5   4  295.97   10.80
  -8  -5   4  314.37   11.60
  -8  -5   4  303.37    9.80
  -8   5   4  303.27   10.00
  -8   5   4  270.57   13.70
  -7  -5   4   14.50    2.30
  -7  -5   4   22.40    3.30
  -7   5   4   21.40    3.90
  -7   5   4   16.60    3.40
  -6  -5   4  128.49    5.50
  -6  -5   4  124.19    6.90
  -6   5   4  116.39    6.30
  -6   5   4  119.19    6.10
  -5  -5   4 1101.69   26.10
  -5   5   4 1093.09   26.20
   5   5  -4  998.10   27.40
   4  -5  -4   65.99   13.50
  -4  -5   4   76.09    3.90
   4   5  -4   67.59    5.50
   4   5  -4   70.59    4.40
   4   5  -4   67.69    4.80
  -4   5   4   71.49    4.90
  -3  -5   4    5.00    1.70
   3  -5  -4    1.60    4.50
   3  -5  -4    0.90    3.00
   3   5  -4    1.10    1.50
   3   5  -4    0.80    1.40
  -3   5   4    0.40    2.20
   3   5  -4    3.00    2.30
  -2  -5   4  774.42   18.90
  -2  -5   4  735.13   28.60
   2  -5  -4  814.02   36.10
   2   5  -4  785.02   20.20
  -2   5   4  756.42   19.30
   2   5  -4  788.42   19.20
   2   5  -4  742.83   19.00
   1  -5  -4  267.67   19.60
  -1  -5   4  251.27    7.50
   1   5  -4  262.97    7.70
   1   5  -4  248.78    7.80
   1   5  -4  264.17    8.40
  -1   5   4  252.07    8.20
   0  -5   4  641.84   16.00
   0  -5  -4  561.64   33.80
   0  -5   4  717.83   25.40
   0   5   4  664.23   16.80
   0   5  -4  658.83   16.40
   0   5  -4  673.33   17.30
   1  -5   4   24.00    6.10
   1  -5   4   20.70    2.40
  -1  -5  -4   27.30    2.90
   1   5   4   22.90    1.70
  -1   5  -4   23.70    2.90
   1   5   4   27.70    3.60
  -1   5  -4   22.80    2.50
   2  -5   4   66.09    9.40
   2  -5   4   68.29    3.40
  -2  -5  -4   66.69    4.70
   2   5   4   71.69    4.60
  -2   5  -4   63.69    3.80
   2   5   4   62.69    4.50
   2   5   4   68.39    3.00
  -2   5  -4   63.49    3.60
   3  -5   4  502.45   12.70
   3  -5   4  515.95   27.00
  -3  -5  -4  448.16   34.60
  -3   5  -4  508.35   13.60
   3   5   4  509.65   13.30
  -3   5  -4  509.95   13.40
   3   5   4  496.05   13.20
   3   5   4  509.45   14.00
  -3   5  -4  523.35   13.30
   4  -5   4  373.06   26.30
  -4  -5  -4  404.26   11.00
   4   5   4  397.86   10.90
  -4   5  -4  396.26   10.90
  -4   5  -4  392.76   10.90
   4   5   4  369.46   11.60
   4   5   4  377.66   11.20
   4   5   4  362.76   11.60
  -5  -5  -4 3570.34   78.69
   5   5   4 3404.66   78.59
  -5   5  -4 3410.46   79.09
  -5   5  -4 3534.15   78.59
   5   5   4 3367.56   78.79
  -6  -5  -4  243.38    8.00
   6   5   4  242.68    8.60
   6   5   4  239.48    8.10
  -6   5  -4  225.68   12.90
  -6   5  -4  244.78    8.00
  -7  -5  -4  521.35   14.10
   7   5   4  483.95   15.10
   7   5   4  506.35   14.20
  -7   5  -4  509.05   14.00
  -8  -5  -4   14.00    2.50
   8   5   4   14.40    3.10
   8   5   4   14.30    2.60
  -8   5  -4   13.00    2.40
  -9  -5  -4  282.37    8.80
  -9   5  -4  282.87    8.90
   9   5   4  287.27    9.00
   9   5   4  283.17    9.70
 -10  -5  -4   19.60    2.80
  10   5   4   18.90    2.60
 -10   5  -4   14.40    2.40
  11  -5   4    5.20    1.30
 -11  -5  -4    5.60    1.90
  11   5   4    3.30    1.50
 -11   5  -4    5.80    1.30
  12  -5   4   14.50    2.10
  12   5   4   12.60    1.70
 -12  -6   4   16.30    2.30
 -12  -6   4   18.10    2.70
 -12   6   4   15.40    1.90
  12   6  -4   15.90    2.60
 -11  -6   4   20.20    2.80
 -11  -6   4   21.90    3.00
 -11   6   4   19.50    2.40
  11   6  -4   26.50    2.70
 -10  -6   4   26.70    4.20
 -10  -6   4   31.90    4.50
  10   6  -4   25.30    3.30
 -10   6   4   22.00    3.70
  -9  -6   4  743.13   20.60
  -9  -6   4  747.23   20.40
  -9  -6   4  735.53   18.90
  -9   6   4  721.03   19.40
   9   6  -4  714.93   19.00
  -8  -6   4    4.30    2.10
  -8  -6   4    8.70    2.80
  -8   6   4    2.70    2.00
  -7  -6   4  430.96   12.50
  -7  -6   4  425.06   12.50
  -7   6   4  393.16   12.70
  -7   6   4  404.56   11.70
  -6  -6   4   -0.30    3.30
  -6   6   4    2.30    3.50
  -6   6   4    4.30    2.50
  -6   6   4    2.20    2.20
  -5  -6   4  340.87   11.60
   5  -6  -4  350.56    9.80
  -5   6   4  350.16   11.90
   4  -6  -4   28.40    3.80
  -4   6   4   26.00    4.10
   4   6  -4   26.60    4.30
  -4   6   4   29.40    4.80
  -3  -6   4 1678.43   38.20
   3   6  -4 1621.54   38.10
   3   6  -4 1596.84   38.90
  -3   6   4 1611.64   38.50
  -2  -6   4    3.60    1.60
   2  -6  -4    5.40    6.10
   2   6  -4    3.30    1.80
   2   6  -4    1.30    1.90
   2   6  -4    2.70    1.80
  -1  -6   4 1696.73   39.90
   1  -6  -4 1835.72   68.59
   1   6  -4 1721.93   40.20
   1   6  -4 1680.33   41.90
  -1   6   4 1748.13   40.70
   1   6  -4 1684.93   40.50
   0  -6   4   44.30    9.90
   0  -6   4   40.30    2.90
   0   6  -4   40.80    3.70
   0   6   4   45.90    3.80
   0   6  -4   45.00    3.30
   0   6  -4   50.49    3.40
   1  -6   4   48.30    9.80
   1  -6   4   54.89    3.10
  -1   6  -4   52.69    3.50
  -1   6  -4   51.69    4.00
   1   6   4   55.79    4.00
   2  -6   4   61.29   12.20
   2  -6   4   66.89    3.40
   2   6   4   63.89    5.00
  -2   6  -4   67.89    4.00
  -2   6  -4   61.69    4.50
   2   6   4   73.99    4.50
   3  -6   4  372.16   25.90
   3   6   4  411.66   11.80
   3   6   4  371.86   11.60
   3   6   4  404.16   11.10
  -3   6  -4  388.26   11.10
  -3   6  -4  381.56   11.00
   4  -6   4  113.99    4.60
  -4  -6  -4  128.89    5.60
   4   6   4  121.99    5.50
   4   6   4  117.49    6.00
   4   6   4  129.29    6.90
  -4   6  -4  115.29    5.40
  -5  -6  -4  751.12   18.90
   5  -6   4  739.33   18.30
   5   6   4  741.53   19.30
  -5   6  -4  663.03   19.20
  -5   6  -4  744.03   18.80
  -5   6  -4  742.63   18.90
   5   6   4  739.13   18.80
   6  -6   4 1133.19   27.20
  -6  -6  -4 1164.48   27.80
  -6   6  -4 1163.48   27.80
   6   6   4 1091.59   28.80
  -6   6  -4 1069.09   28.00
   6   6   4 1145.59   27.80
  -6   6  -4 1145.49   27.80
  -7  -6  -4  928.01   23.10
   7  -6   4  918.71   22.50
   7   6   4  955.50   23.30
  -7   6  -4  817.22   23.10
   7   6   4  914.71   23.30
  -7   6  -4  933.91   23.10
   8  -6   4    7.30    3.10
   8   6   4    9.70    3.10
   8   6   4    5.20    2.60
   9  -6   4  169.38    5.70
  -9  -6  -4  158.88    6.00
   9   6   4  183.28    7.20
   9   6   4  164.38    6.10
  -9   6  -4  161.38    6.00
  10  -6   4  107.19    4.00
 -10  -6  -4   95.69    4.40
  10   6   4  101.79    4.90
 -10   6  -4   99.69    4.20
  10   6   4  101.89    4.30
  11  -6   4   45.80    4.10
 -11  -6  -4   32.70    3.90
  11   6   4   36.50    2.70
 -12  -7   4   55.99    2.90
 -12   7   4   65.59    2.90
  12   7  -4   59.49    3.20
 -11  -7   4   55.79    3.30
  11  -7  -4   44.90    3.30
 -11   7   4   58.19    3.10
  11   7  -4   62.79    3.30
  11   7  -4   61.19    4.40
 -10  -7   4   58.89    4.00
  10  -7  -4   64.49    3.40
 -10  -7   4   62.89    5.10
  10   7  -4   63.59    3.80
  -9  -7   4  216.68    8.10
  -9  -7   4  235.18    9.00
   9  -7  -4  213.88    6.80
  -9  -7   4  210.88    7.60
   9   7  -4  226.78    7.90
  -9   7   4  219.68    7.90
  -8  -7   4   11.70    3.30
  -8  -7   4    9.50    2.60
   8  -7  -4   13.40    3.80
  -8   7   4    8.40    2.20
  -8   7   4    8.80    2.80
  -7  -7   4   -2.10    3.30
   7  -7  -4    0.50    2.00
  -7  -7   4   -2.00    2.00
  -7   7   4   -0.50    2.30
  -7   7   4   -0.30    1.90
  -6  -7   4    5.00    3.90
  -6  -7   4    3.20    2.10
   6  -7  -4    3.30    2.10
  -6   7   4   -0.50    2.40
  -6   7   4    3.10    3.20
  -6   7   4    2.80    2.10
  -5  -7   4  318.27   10.00
   5  -7  -4  309.27    9.30
  -5  -7   4  279.27   13.60
   5   7  -4  332.27   14.30
  -5   7   4  329.47   10.60
  -5   7   4  332.77   10.20
  -4  -7   4  220.48    7.70
  -4   7   4  220.18    8.30
  -4   7   4  231.98    8.30
   4   7  -4  221.68    8.00
  -3  -7   4  112.39    5.00
  -3   7   4  111.99    5.60
   3   7  -4  106.89    5.30
  -3   7   4   96.69    5.70
  -2  -7   4 1588.14   36.50
  -2   7   4 1566.74   37.10
   2   7  -4 1545.95   36.60
  -2   7   4 1485.65   36.80
  -1  -7   4  254.97    7.80
   1   7  -4  237.48    7.90
   1   7  -4  230.18    8.70
  -1   7   4  265.27    9.10
   0  -7   4  154.38    5.60
   0   7   4  163.78    6.60
   0   7   4  153.68    8.10
   0   7   4  170.98    7.80
   0   7  -4  154.88    6.10
   0   7  -4  146.49    6.70
   1  -7   4   15.00    2.40
  -1   7  -4   14.00    2.40
   1   7   4   15.90    2.70
   1   7   4   11.90    3.00
  -1   7  -4   17.00    3.40
   2  -7   4  663.13   16.30
  -2   7  -4  634.84   16.70
  -2   7  -4  641.64   17.30
   2   7   4  634.84   17.20
   2   7   4  630.24   17.10
   3  -7   4  371.16   10.50
   3   7   4  390.16   11.80
   3   7   4  384.66   11.50
  -3   7  -4  391.56   11.80
   3   7   4  370.96   11.20
  -3   7  -4  386.16   11.20
  -4  -7  -4  319.47    9.80
   4  -7   4  307.17    9.10
   4   7   4  305.37   10.50
   4   7   4  300.17    9.50
   4   7   4  307.87   10.10
  -4   7  -4  304.27    9.70
  -4   7  -4  312.67   10.20
   5  -7   4 1224.18   28.80
   5   7   4 1167.98   29.10
  -5   7  -4 1192.68   29.30
   5   7   4 1201.18   29.60
   6  -7   4  380.06   10.60
  -6  -7  -4  374.46   11.00
   6   7   4  373.16   11.10
  -6   7  -4  339.97   11.30
   6   7   4  359.26   11.30
  -6   7  -4  376.76   11.40
   7  -7   4  537.15   13.90
  -7  -7  -4  495.65   14.30
   7   7   4  521.45   14.60
   7   7   4  525.95   14.50
  -7   7  -4  473.55   14.30
   8  -7   4   16.00    2.30
  -8  -7  -4   14.90    2.80
  -8   7  -4   19.10    3.30
   8   7   4   10.40    1.70
  -9  -7  -4   32.40    3.40
   9  -7   4   35.40    2.60
   9   7   4   41.50    2.90
   9   7   4   37.10    3.30
  10  -7   4   32.40    2.30
 -10  -7  -4   22.90    4.00
  10   7   4   31.00    3.20
  10   7   4   33.30    2.60
  11  -7   4   96.99    3.50
  11   7   4   94.09    3.80
 -11  -8   4   52.79    2.90
  11   8  -4   49.10    3.50
  11   8  -4   49.70    3.00
 -10  -8   4    0.90    1.50
  10  -8  -4   -2.10    2.10
  10   8  -4    3.90    1.50
  10   8  -4    3.00    1.40
  -9  -8   4   85.89    4.30
   9  -8  -4   83.49    4.00
   9   8  -4   92.69    4.20
   8  -8  -4   95.49    4.40
  -8  -8   4   97.19    4.80
  -8   8   4  106.19    5.40
  -8   8   4  102.09    5.00
   8   8  -4  101.79    5.30
   7  -8  -4  584.14   16.00
  -7   8   4  617.04   15.80
  -7   8   4  628.44   16.70
  -6  -8   4   -1.70    2.10
   6  -8  -4    3.10    2.40
  -6   8   4    2.90    2.10
  -6   8   4    2.80    2.20
  -6   8   4    1.60    3.20
   5  -8  -4    5.20    2.50
  -5  -8   4    3.10    2.00
  -5   8   4    6.50    2.50
  -5   8   4    8.10    3.00
   5   8  -4    7.60    3.70
   4  -8  -4  197.78    7.40
  -4  -8   4  205.48    7.50
  -4   8   4  207.28    8.20
  -4   8   4  198.48    8.30
   4   8  -4  206.58    8.00
  -3  -8   4  266.97    8.80
  -3   8   4  276.67    9.60
   3   8  -4  273.77    9.00
  -3   8   4  259.97    9.30
  -2  -8   4   19.30    3.20
  -2   8   4   26.20    3.30
   2   8  -4   25.30    3.60
  -2   8   4   26.40    4.40
  -1  -8   4  458.15   12.60
  -1   8   4  472.65   13.30
  -1   8   4  436.16   14.60
   1   8  -4  453.85   12.90
  -1   8   4  443.36   13.30
   0  -8   4   53.69    3.60
   0   8  -4   47.80    4.00
   0   8   4   52.89    4.50
   0   8   4   53.49    5.60
   1  -8   4  910.11   23.00
  -1   8  -4  940.81   23.60
   1   8   4  943.21   24.10
   1   8   4  949.71   23.70
  -2   8  -4  182.68    7.10
  -2   8  -4  186.48    7.70
   2   8   4  185.98    7.50
   2   8   4  188.38    7.60
   3  -8   4    1.40    1.60
  -3   8  -4    1.30    1.90
   3   8   4    4.10    2.30
   3   8   4    4.10    3.10
   3   8   4    2.70    2.60
   4  -8   4   87.39    4.40
  -4  -8  -4   77.69    5.00
   4   8   4   79.19    5.20
   4   8   4   86.69    5.30
   4   8   4   74.39    5.90
  -4   8  -4   81.29    5.10
  -4   8  -4   90.09    5.70
  -5  -8  -4  160.38    6.60
   5  -8   4  164.98    6.20
   5   8   4  154.78    6.60
   5   8   4  151.98    8.90
  -5   8  -4  163.68    7.00
   5   8   4  155.58    6.90
  -5   8  -4  172.08    7.10
   6   8   4    2.00    2.20
  -6   8  -4    0.40    2.50
   7  -8   4   12.00    1.70
  -7  -8  -4   11.00    1.90
   7   8   4   10.60    2.50
   7   8   4   10.20    1.80
   8  -8   4   50.59    2.90
  -8  -8  -4   56.29    3.70
   8   8   4   53.79    3.40
  -8   8  -4   59.69    3.90
   8   8   4   56.09    3.50
   9  -8   4   10.50    1.40
   9   8   4   16.10    2.50
   9   8   4    9.50    1.50
  10  -8   4    3.40    1.20
  10   8   4    5.90    1.50
 -10  -9   4    4.50    1.40
  10   9  -4    5.10    1.40
  10   9  -4    3.70    1.50
  -9  -9   4   33.80    3.00
  -9  -9   4   34.40    3.00
   9   9  -4   37.30    2.80
   9   9  -4   33.30    2.60
  -8  -9   4  103.89    4.70
  -8  -9   4  110.79    5.20
   8   9  -4  116.79    4.70
  -8   9   4  104.99    4.10
   7  -9  -4   32.50    3.70
  -7  -9   4   29.60    3.20
   7   9  -4   32.20    3.80
  -7   9   4   31.50    3.60
   6  -9  -4  375.46   11.10
  -6  -9   4  377.86   11.40
  -6   9   4  369.86   11.40
  -6   9   4  412.56   12.30
  -6   9   4  387.06   10.90
  -5  -9   4  106.49    5.80
  -5   9   4  107.69    5.10
   5   9  -4  103.59   11.60
  -5   9   4  119.79    6.60
  -5   9   4  104.19    6.60
  -4  -9   4  659.93   17.80
  -4   9   4  655.83   18.30
   4   9  -4  656.93   17.90
  -4   9   4  663.53   18.00
  -3  -9   4    6.20    2.10
   3   9  -4    7.60    2.50
  -3   9   4    4.00    2.50
  -3   9   4    5.50    2.70
  -2  -9   4  135.39    6.00
   2   9  -4  140.59    6.30
  -2   9   4  129.99    6.50
  -2   9   4  138.19    6.80
  -1  -9   4  114.69    5.50
   1   9  -4  122.59    5.90
  -1   9   4  120.49    6.40
   0  -9   4    2.90    1.90
   0   9   4    9.90    3.00
   0   9   4    0.60    2.50
   0   9  -4    2.30    2.00
   1  -9   4  292.37    9.00
   1   9   4  278.67    9.90
   1   9   4  276.97    9.60
  -1   9  -4  280.47    9.40
   2  -9   4   62.69    4.10
   2   9   4   59.09    4.80
  -2   9  -4   55.69    4.60
   2   9   4   60.49    4.90
   2   9   4   55.19    5.00
   3  -9   4   27.40    3.30
  -3  -9  -4   38.70    5.10
   3   9   4   24.30    5.10
  -3   9  -4   28.20    4.00
   3   9   4   31.80    4.30
   3   9   4   30.40    4.90
   4  -9   4   61.59    4.00
  -4  -9  -4   52.79    4.40
   4   9   4   66.19    4.70
  -4   9  -4   63.19    4.90
   4   9   4   49.10    6.00
  -4   9  -4   57.49    5.10
  -5  -9  -4  292.67    8.90
   5  -9   4  296.17    8.70
   5   9   4  273.17    8.70
  -5   9  -4  308.77    9.80
   5   9   4  304.57    9.80
  -5   9  -4  290.67    9.10
   6  -9   4  147.49    5.20
  -6  -9  -4  141.39    5.40
   6   9   4  138.29    6.20
  -6   9  -4  156.38    6.60
   6   9   4  141.59    5.50
  -6   9  -4  151.78    5.90
  -7  -9  -4   74.89    4.00
   7  -9   4   75.59    3.40
  -7   9  -4   68.89    3.90
   7   9   4   73.19    3.90
   7   9   4   73.29    3.90
   8  -9   4    1.40    1.10
   8   9   4    3.00    1.40
   8   9   4    0.70    1.70
   9  -9   4   75.59    3.10
   9   9   4   62.09    3.50
   9   9   4   77.79    3.30
  -9 -10   4   68.09    3.30
   9  10  -4   66.29    3.40
   9  10  -4   73.19    3.10
  -9  10   4   60.49    3.00
  -8 -10   4  151.88    5.50
  -8 -10   4  152.88    5.70
  -8  10   4  150.88    5.40
  -8  10   4  152.38    4.60
   8  10  -4  154.68    5.20
   8  10  -4  149.79    5.70
  -7 -10   4  215.68    7.00
  -7  10   4  203.98    7.00
  -7  10   4  205.48    6.10
  -6 -10   4   49.20    3.40
  -6  10   4   41.80    4.40
   6  10  -4   48.80    4.00
  -5 -10   4   28.40    2.90
  -5  10   4   21.60    3.60
   5  10  -4   24.60    3.60
  -5  10   4   23.20    3.10
  -4 -10   4    4.00    1.60
   4  10  -4    5.60    2.40
   4  10  -4    5.50    2.10
  -4  10   4    8.10    2.20
  -4  10   4    6.70    1.90
  -3 -10   4  377.26   11.10
   3  10  -4  369.96   11.20
  -3  10   4  376.56   11.60
  -3  10   4  375.46   11.50
  -1 -10   4  190.78    7.50
  -1  10   4  194.48    8.30
   1  10  -4  193.08    7.90
   0 -10   4  166.28    6.70
   0  10   4  166.88    7.60
   0  10   4  163.18    7.20
   0  10  -4  152.18    7.00
   1  10   4  450.75   12.20
   1  10   4  443.76   12.90
   2 -10   4  162.58    6.00
   2  10   4  168.98    7.00
  -2  10  -4  174.38    6.50
   2  10   4  165.18    6.30
   2  10   4  169.38    6.80
   3 -10   4  397.66   11.20
  -3 -10  -4  407.16   11.40
  -3  10  -4  394.36   11.80
   3  10   4  406.56   12.10
   3  10   4  411.36   12.00
   4 -10   4    0.70    1.30
  -4 -10  -4   -1.10    1.70
  -4  10  -4   -1.60    1.80
   4  10   4    1.90    2.60
   4  10   4    0.60    2.10
   5 -10   4    0.00    1.20
  -5 -10  -4    0.60    1.90
  -5  10  -4    1.30    2.00
   5  10   4   -1.70    1.80
  -6 -10  -4    0.60    2.30
   6 -10   4    1.40    1.20
  -6  10  -4    8.40    2.70
   6  10   4    3.10    1.40
   7 -10   4   14.10    2.10
   7  10   4   16.80    2.20
   7  10   4   14.40    2.50
   8 -10   4   22.00    2.10
   8  10   4   16.80    2.00
  -8 -11   4   15.20    2.00
  -8 -11   4   11.30    1.60
  -8  11   4   11.40    1.40
   8  11  -4   14.00    1.80
  -8  11   4   12.30    1.70
  -7 -11   4  268.07    7.90
  -7 -11   4  276.07    8.20
   7  11  -4  268.77    7.90
   7  11  -4  285.77    7.80
  -7  11   4  268.87    7.80
  -7  11   4  281.97    7.30
  -6 -11   4   60.99    3.50
   6  11  -4   54.89    2.90
  -6  11   4   47.50    3.00
  -6  11   4   54.29    4.40
   6  11  -4   44.50    4.10
  -6  11   4   56.89    2.60
  -5 -11   4  124.89    5.00
  -5  11   4  118.39    4.90
  -5  11   4  129.29    4.40
   5  11  -4  129.79    4.80
  -5  11   4  126.19    5.30
  -4 -11   4   50.99    3.40
   4  11  -4   45.90    3.10
  -4  11   4   47.10    3.70
   4  11  -4   46.70    4.30
  -4  11   4   48.90    2.80
  -3 -11   4   46.80    3.20
   3  11  -4   46.80    3.90
  -3  11   4   49.80    3.50
  -3  11   4   39.60    3.50
  -2 -11   4  126.99    5.10
  -2  11   4  118.79    5.50
   2  11  -4  133.19    6.50
   2  11  -4  129.09    5.40
  -2  11   4  130.19    5.20
  -1 -11   4   49.80    3.40
  -1  11   4   48.20    3.80
   1  11  -4   56.29    3.80
  -1  11   4   59.49    3.70
   0 -11   4    2.40    1.40
   0  11   4    0.20    1.70
   0  11   4   -1.10    1.80
   0  11  -4    1.30    1.70
   0  11   4   -2.90    2.60
   1 -11   4   30.50    2.90
   1  11   4   24.20    3.40
  -1  11  -4   37.90    3.20
   1  11   4   28.30    3.90
   1  11   4   31.70    3.80
  -2 -11  -4   59.69    3.90
   2 -11   4   61.39    3.40
   2  11   4   59.49    4.00
  -2  11  -4   59.09    3.60
   2  11   4   58.19    3.70
   2  11   4   60.09    3.20
   3 -11   4  272.67    8.10
  -3 -11  -4  263.37    7.90
   3  11   4  268.77    8.10
  -3  11  -4  267.87    8.50
   3  11   4  263.57    8.70
   4 -11   4    3.60    1.30
  -4 -11  -4    4.30    2.10
   4  11   4    2.80    3.00
  -4  11  -4    1.10    1.80
   4  11   4    4.50    1.50
   5 -11   4  306.67    8.70
  -5  11  -4  313.67   10.70
   5  11   4  309.87    8.90
   6 -11   4    4.80    1.20
   6  11   4    2.40    1.30
  -6  11  -4    4.70    4.50
   7 -11   4  192.58    5.60
   7  11   4  188.58    5.70
  -6 -12   4   -0.70    1.60
   6  12  -4   -0.80    1.00
  -6  12   4    1.00    0.90
  -5 -12   4    5.40    1.70
  -5  12   4    2.30    2.30
   5  12  -4    7.80    1.20
  -5  12   4   10.60    1.40
  -4  12   4    4.60    2.20
   4  12  -4    4.60    1.20
  -4  12   4    4.80    1.00
  -3  12   4   13.30    1.70
   3  12  -4    9.00    2.30
  -3  12   4    9.60    1.90
   3  12  -4   12.30    1.50
  -2 -12   4  246.88    7.70
   2  12  -4  245.78    7.90
   2  12  -4  248.68    7.10
  -2  12   4  244.78    8.00
  -2  12   4  252.77    7.00
  -1 -12   4   77.49    3.70
   1  12  -4   80.19    4.00
  -1  12   4   74.19    3.10
  -1  12   4   75.79    4.10
   0 -12  -4  306.27    9.90
   0 -12   4  352.16    9.70
   0  12  -4  354.76   10.10
   0  12   4  346.27    9.10
   0  12   4  355.16   10.30
   1 -12   4  186.48    6.00
  -1 -12  -4  183.58    7.10
  -1  12  -4  184.48    6.40
   1  12   4  178.68    5.90
   1  12   4  188.38    5.50
   1  12   4  182.98    6.50
  -2 -12  -4    5.40    2.10
   2 -12   4    3.30    1.40
   2  12   4    3.70    2.00
   2  12   4    2.60    1.70
   2  12   4    1.90    1.70
   3 -12   4  237.88    7.30
   3  12   4  230.88    6.80
   3  12   4  229.18    7.60
  -3  12  -4  233.48    8.70
   4 -12   4    7.80    1.50
  -4  12  -4    9.00    1.90
   4  12   4    6.50    1.30
   5 -12   4    8.30    1.40
   5  12   4    9.50    1.30
  -2 -13   4    1.70    1.60
   2  13  -4   -0.30    2.20
  -2  13   4   -0.20    1.70
  -2  13   4    2.00    0.80
  -1 -13   4    8.70    1.60
   1  13  -4    9.00    1.90
  -1  13   4    9.10    1.00
  -1  13   4    7.80    1.80
   0 -13   4   26.80    2.70
   0  13   4   21.20    2.90
   0  13  -4   23.00    2.70
   1 -13   4   95.09    3.80
  -1  13  -4   89.79    3.90
   1  13   4   89.09    4.20
   1  13   4   89.79    3.10
 -14   0   5    0.40    1.00
 -14   0   5    2.00    1.10
 -13   0   5  449.06   12.40
 -13   0   5  456.75   12.00
 -12   0   5    4.80    2.10
 -12   0   5    1.00    2.10
 -11   0   5  145.59    6.10
 -11   0   5  137.49    6.80
 -10   0   5    1.10    2.20
 -10   0   5   -0.60    2.00
  -9   0   5 1275.77   30.70
  -9   0   5 1260.07   31.50
  -8   0   5   -0.50    2.70
  -8   0   5    0.50    2.40
   7   0  -5  910.71   23.20
   7   0  -5  943.31   43.00
   6   0  -5    1.50    5.10
   6   0  -5    0.40    1.30
   6   0  -5    0.20    1.20
   5   0  -5    3.50    1.00
   5   0  -5    2.80    1.00
   5   0  -5    2.90    3.00
   4   0  -5    2.50    0.80
   4   0  -5    2.10    0.80
   3   0  -5  569.64   19.20
   3   0  -5  570.64   14.40
   3   0  -5  573.94   13.90
   2   0  -5    1.10    1.00
   2   0  -5    1.30    0.60
  -1   0   5   64.29    4.90
   1   0  -5   58.29    2.70
   0   0  -5    0.80    1.40
   0   0   5    0.10    1.40
   0   0  -5    1.50    0.80
   0   0  -5    0.20    0.50
  -1   0  -5  607.54   14.60
   1   0   5  578.04   23.50
   2   0   5    1.70    3.90
  -4   0  -5   -0.70    1.50
   4   0   5    1.40    1.80
  -5   0  -5  431.06   11.70
   5   0   5  435.46   11.70
   5   0   5  433.76   12.10
  -5   0  -5  433.76   12.00
  -6   0  -5    0.90    1.40
   6   0   5    0.30    1.60
  -7   0  -5   50.99    4.90
  -7   0  -5   53.99    3.70
   7   0   5   49.00    3.90
   8   0   5   -1.40    1.90
  -8   0  -5    2.60    2.50
  -8   0  -5    0.00    1.70
   9   0   5  767.52   19.80
  -9   0  -5  771.42   20.00
  -9   0  -5  749.03   19.60
 -10   0  -5    2.30    2.20
  10   0   5   -1.90    2.00
 -10   0  -5   -0.10    1.40
  11   0   5    3.40    2.30
 -11   0  -5    4.10    1.50
 -12   0  -5    1.60    1.30
 -13   0  -5  417.96   10.80
 -14  -1   5   29.70    2.10
 -14  -1   5   26.80    2.00
 -14   1   5   28.40    2.10
 -14   1   5   27.30    1.90
 -13  -1   5  113.29    4.40
 -13  -1   5  113.49    4.60
 -13   1   5  119.89    4.30
 -13   1   5  111.09    4.60
 -12  -1   5  419.86   12.80
 -12  -1   5  428.06   12.20
 -12   1   5  446.36   12.30
 -12   1   5  432.96   12.70
 -11  -1   5  188.38    7.10
 -11  -1   5  180.08    7.60
 -11   1   5  185.88    7.60
 -11   1   5  184.88    7.00
 -10  -1   5   86.19    5.00
 -10  -1   5   94.69    5.80
 -10   1   5   89.99    5.60
 -10   1   5   93.59    5.20
  -9  -1   5  399.46   12.50
  -9  -1   5  387.06   11.60
  -9   1   5  393.46   12.30
  -9   1   5  393.76   11.50
  -8  -1   5  137.09    6.80
  -8  -1   5  129.59    6.00
  -8   1   5  135.89    6.10
  -8   1   5  130.49    6.70
  -8   1   5  146.09    6.30
   7  -1  -5  294.27   23.80
  -7  -1   5  308.07    9.90
   7  -1  -5  328.17    9.60
   7   1  -5  316.07   10.10
  -7   1   5  315.87    9.50
   6  -1  -5   14.70    6.30
   6  -1  -5   12.10    1.80
   6  -1  -5   13.20    2.20
  -6  -1   5   13.30    2.20
   6   1  -5   13.50    2.70
   6   1  -5   12.70    2.40
   5  -1  -5 2870.01   65.89
   5  -1  -5 2906.81   82.59
   5  -1  -5 2846.72   65.69
   5   1  -5 2947.80   66.49
   5   1  -5 3025.80   82.09
   5   1  -5 2864.61   77.89
   5   1  -5 2922.51   66.29
   4  -1  -5   59.69    7.10
   4  -1  -5   61.59    2.50
   4  -1  -5   61.39    2.80
   4   1  -5   57.99    2.90
   4   1  -5   62.69    7.40
   4   1  -5   59.99    5.60
   4   1  -5   61.69    2.80
   3  -1  -5  255.47    7.40
   3  -1  -5  259.07    6.70
   3  -1  -5  258.87   13.10
   3   1  -5  259.47    7.50
   3   1  -5  229.78    9.50
   3   1  -5  268.57    7.10
   2  -1  -5  575.84   20.40
   2   1  -5  587.14   14.70
   1  -1  -5 3468.25  100.59
   1  -1  -5 4322.77   90.99
   1   1  -5 4315.37   91.99
  -1   1   5 4211.78  100.89
   0  -1  -5   95.69    3.30
   0  -1   5  104.19    5.60
   0   1  -5   95.29    3.70
   0   1   5   96.19    8.10
  -1  -1  -5  852.01   20.40
  -1  -1  -5  874.81   31.80
  -1   1  -5  863.81   21.00
   1   1   5  885.11   30.50
  -1   1  -5  852.51   20.70
  -2  -1  -5 1482.95   34.10
  -2   1  -5 1476.85   34.50
  -2   1  -5 1491.35   34.30
   2   1   5 1428.66   50.19
   3  -1   5    3.80    6.30
  -3  -1  -5    7.20    2.00
   3   1   5    3.70    7.10
   3   1   5    9.70    1.50
  -3   1  -5    7.60    1.60
   4  -1   5  681.83   17.20
  -4  -1  -5  689.93   17.20
  -4   1  -5  715.33   17.50
  -4   1  -5  676.83   17.20
   4   1   5  705.53   17.20
  -5  -1  -5  447.46   12.00
   5  -1   5  436.86   12.00
  -5   1  -5  471.85   12.10
   5   1   5  436.66   12.50
  -5   1  -5  449.86   12.10
   5   1   5  459.85   12.10
  -6  -1  -5   13.00    2.30
   6  -1   5   16.30    2.30
   6   1   5   20.90    3.10
  -6   1  -5   15.00    2.70
  -6   1  -5   22.60    3.20
   7  -1   5   99.19    5.00
  -7  -1  -5   97.49    6.20
  -7  -1  -5   94.39    4.60
  -7   1  -5   97.29    4.60
  -7   1  -5   91.99    5.40
   7   1   5   99.09    4.90
  -8  -1  -5   68.49    4.40
   8  -1   5   74.79    4.90
  -8  -1  -5   68.79    5.30
   8   1   5   77.19    4.70
  -8   1  -5   78.59    4.50
  -9  -1  -5    9.80    2.70
  -9  -1  -5    8.10    2.20
   9  -1   5    7.80    2.70
   9   1   5    8.70    2.40
  -9   1  -5    5.90    2.30
  -9   1  -5    7.30    2.00
  10  -1   5   13.40    2.60
 -10  -1  -5   16.30    2.70
 -10  -1  -5   18.30    2.70
  10   1   5   12.30    2.00
 -10   1  -5   19.40    2.70
 -11  -1  -5  216.08    7.20
 -11  -1  -5  228.18    6.90
 -11   1  -5  219.18    7.30
  11   1   5  209.08    7.20
 -12  -1  -5   35.00    2.70
  12   1   5   32.70    2.90
 -12   1  -5   30.90    2.60
 -13  -1  -5    1.10    1.50
 -13   1  -5    2.10    1.30
 -14  -2   5    0.10    1.10
 -14  -2   5    0.10    1.10
 -14   2   5    1.60    1.10
 -14   2   5   -0.70    1.00
 -13  -2   5  150.78    5.00
 -13  -2   5  144.09    5.40
 -13   2   5  149.19    5.30
 -13   2   5  145.19    4.80
 -12  -2   5  843.32   22.20
 -12  -2   5  862.51   21.50
 -12   2   5  862.41   21.60
 -12   2   5  864.21   22.10
 -11  -2   5   26.80    4.10
 -11  -2   5   26.10    3.70
 -11   2   5   23.50    3.70
  11   2  -5   25.90    3.90
 -11   2   5   23.30    2.90
 -10  -2   5   86.19    4.90
 -10  -2   5   87.99    5.70
 -10   2   5   77.39    5.00
 -10   2   5   82.89    5.20
  -9   2   5  308.27    9.80
  -8  -2   5   44.80    4.40
  -8  -2   5   41.00    4.90
  -8   2   5   42.40    4.60
  -8   2   5   48.30    4.60
  -7  -2   5    3.40    3.10
  -7  -2   5    4.00    1.80
  -7  -2   5    2.30    2.50
   7  -2  -5   -0.60    8.40
  -7   2   5    2.20    2.90
   6  -2  -5  150.08    5.10
   6  -2  -5  144.49   15.90
  -6  -2   5  157.68    5.80
   6   2  -5  150.48    6.10
   6   2  -5  152.48    6.00
   5  -2  -5 2582.14   77.89
   5  -2  -5 2623.94   58.19
  -5  -2   5 2472.85   60.39
  -5  -2   5 2538.15   58.89
   5  -2  -5 2647.54   58.79
   5   2  -5 2587.94   59.69
   5   2  -5 2645.34   59.39
   4  -2  -5 3559.24   78.69
   4  -2  -5 3676.53   96.59
   4  -2  -5 3550.64   79.69
  -4  -2   5 3550.54   80.69
   4   2  -5 3464.35   84.59
   4   2  -5 3372.96   85.39
   4   2  -5 3603.94   79.79
   4   2  -5 3424.46   80.09
  -3  -2   5   65.89    4.10
   3  -2  -5   68.49    7.60
   3  -2  -5   70.89    2.30
   3   2  -5   70.89    3.30
   3   2  -5   71.29    3.00
   2  -2  -5  462.35   20.00
   2  -2  -5  488.25   11.50
   2   2  -5  492.65   12.80
  -2   2   5  491.35   22.40
   1  -2  -5  193.18   12.40
   1  -2  -5  182.58    5.00
  -1   2   5  180.88   12.60
   1   2  -5  187.58    5.90
   0  -2  -5 1043.00   23.50
   0   2  -5 1030.10   24.40
   0   2   5  970.20   34.60
   1  -2   5  971.10   33.90
  -1  -2  -5 1166.88   25.80
  -1   2  -5 1142.19   26.50
  -1   2  -5 1119.89   26.20
   1   2   5 1139.29   38.70
  -2  -2  -5  399.96   11.00
  -2  -2  -5  437.56   23.80
   2  -2   5  457.15   22.10
   2   2   5  415.26   10.80
  -2   2  -5  408.86   11.30
   2   2   5  424.66   23.20
  -2   2  -5  405.76   11.20
  -3  -2  -5    3.70    1.60
   3  -2   5    3.40    6.00
   3   2   5    2.60    0.90
   3   2   5    1.00    2.10
  -3   2  -5    2.80    0.80
   4  -2   5  149.88    6.10
  -4  -2  -5  168.08    5.70
   4   2   5  163.18    5.80
  -4   2  -5  160.58    5.70
  -4   2  -5  162.08    5.40
   4   2   5  163.08    5.60
  -5  -2  -5    7.50    1.70
   5  -2   5    9.00    2.20
  -5   2  -5    7.70    1.80
   5   2   5    6.50    1.70
   5   2   5    8.40    1.80
   6  -2   5   27.90    4.00
  -6  -2  -5   23.20    3.00
   6   2   5   24.90    3.30
  -6   2  -5   23.90    3.60
  -6   2  -5   37.90    4.30
  -7  -2  -5    2.30    1.70
   7  -2   5    1.50    2.40
  -7  -2  -5    2.90    3.70
   7   2   5    0.80    1.70
  -7   2  -5    4.20    2.30
  -7   2  -5    2.00    1.60
  -8  -2  -5   56.89    7.60
   8  -2   5   72.69    5.50
  -8  -2  -5   80.59    4.70
   8   2   5   74.89    4.70
  -8   2  -5   77.99    4.50
  -8   2  -5   74.29    4.90
  -9  -2  -5  981.60   24.80
   9  -2   5 1002.10   25.20
  -9  -2  -5 1020.10   25.40
  -9   2  -5 1012.50   25.10
   9   2   5 1034.90   25.40
  -9   2  -5  994.30   25.30
 -10  -2  -5  203.98    7.10
 -10  -2  -5  206.08    7.40
 -10   2  -5  202.48    7.30
 -10   2  -5  194.58    7.00
  10   2   5  205.38    7.00
 -11  -2  -5    3.70    1.40
 -11  -2  -5    0.70    1.80
  11   2   5   -0.10    1.70
 -11   2  -5   -0.20    1.20
 -12  -2  -5  142.39    6.30
  12   2   5  161.08    5.70
 -12   2  -5  160.38    5.40
 -13  -3   5  590.74   14.80
 -13  -3   5  597.74   15.40
 -13   3   5  585.04   14.60
 -13   3   5  599.44   15.20
 -12  -3   5   47.50    4.00
 -12  -3   5   50.49    3.10
 -12   3   5   43.40    2.90
  12   3  -5   42.10    3.80
 -12   3   5   43.60    3.70
 -11  -3   5  201.58    7.30
 -11  -3   5  203.78    8.20
 -11   3   5  206.98    7.80
 -11   3   5  204.28    7.20
 -10  -3   5  513.25   15.30
 -10  -3   5  496.35   14.10
 -10   3   5  507.75   14.70
 -10   3   5  524.45   14.10
  -9  -3   5  642.64   17.10
  -9   3   5  642.04   17.50
  -9   3   5  650.73   17.70
  -8  -3   5   12.80    2.80
  -8  -3   5    7.70    2.10
  -8  -3   5   10.10    3.00
  -8   3   5   10.40    3.10
  -8   3   5    8.70    2.50
  -7  -3   5   13.90    2.70
  -7   3   5    2.60    4.60
   6  -3  -5   62.09   13.60
   6   3  -5   65.49    4.80
   6   3  -5   61.29    4.60
  -5  -3   5 3937.81   91.19
   5  -3  -5 4161.28  116.09
   5  -3  -5 4073.59   91.19
   5   3  -5 4058.99   92.49
   5   3  -5 4022.90   91.99
   4  -3  -5  273.37   18.50
  -4  -3   5  269.77    8.50
   4   3  -5  288.67    8.80
   4   3  -5  280.97    8.40
   3  -3  -5  606.64   27.30
   3   3  -5  620.54   16.10
   3   3  -5  616.64   15.60
   2  -3  -5 5370.96  134.99
   2  -3  -5 5102.09  116.79
  -2  -3   5 5369.36  119.79
  -2   3   5 5309.87  138.49
   1  -3  -5   99.99   10.00
   1  -3  -5   94.49    2.90
  -1  -3   5   90.39    5.00
  -1   3   5   92.69   11.70
   1   3  -5   97.29    4.00
   0  -3   5 1067.09   26.80
   0   3   5 1077.89   40.40
   0   3  -5 1105.69   26.20
   1  -3   5 1939.61   51.29
  -1  -3  -5 1872.61   43.40
  -1   3  -5 1851.41   44.30
   1   3   5 1909.91   61.29
  -1   3  -5 1969.80   44.20
  -2  -3  -5  341.97    9.70
  -2   3  -5  363.26    9.90
   2   3   5  345.47    9.20
  -3  -3  -5    1.30    4.50
  -3  -3  -5    6.20    1.70
   3   3   5    1.90    1.80
   3   3   5    2.00    1.00
   4  -3   5 2437.76   58.59
  -4  -3  -5 2674.03   58.99
  -4   3  -5 2652.93   59.19
  -4   3  -5 2543.45   58.79
   4   3   5 2621.94   58.89
   4   3   5 2562.94   59.49
   5  -3   5 2186.68   51.69
  -5  -3  -5 2345.17   52.09
   5   3   5 2250.07   52.99
  -5   3  -5 2166.88   51.99
   5   3   5 2324.87   51.99
  -5   3  -5 2298.37   51.99
  -5   3  -5 2230.38   51.89
   6  -3   5   65.69    5.20
  -6  -3  -5   69.99    4.10
  -6   3  -5   67.89    4.80
   6   3   5   69.39    6.40
   6   3   5   69.69    4.20
  -6   3  -5   79.59    4.30
   7  -3   5  116.29    6.50
  -7  -3  -5  121.59    5.40
  -7   3  -5  129.29    5.90
   7   3   5  126.89    7.60
   7   3   5  118.09    5.50
  -7   3  -5  130.99    5.50
  -8  -3  -5  291.57    9.40
  -8   3  -5  286.87    9.20
   8   3   5  279.17   10.80
   8   3   5  291.07    9.40
  -8   3  -5  284.17    9.30
  -9  -3  -5   20.80    3.60
  -9  -3  -5   22.50    4.00
  -9   3  -5   25.20    3.50
  -9   3  -5   16.50    2.60
   9   3   5   21.20    2.90
 -10  -3  -5   40.30    5.20
 -10  -3  -5   39.40    3.20
 -10   3  -5   39.00    3.00
  10   3   5   39.60    3.20
 -11  -3  -5    7.30    1.60
  11   3   5    7.20    1.60
 -11   3  -5    7.10    1.40
  12  -3   5  167.18    5.10
 -12  -3  -5  161.68    5.50
  12   3   5  166.88    5.70
 -13  -4   5  190.98    5.70
 -13  -4   5  194.18    6.10
 -13   4   5  201.38    6.00
  13   4  -5  180.08    6.40
 -13   4   5  184.38    5.50
 -12  -4   5   16.20    2.30
 -12  -4   5   11.30    1.80
  12   4  -5   11.80    2.00
 -12   4   5   11.30    1.60
 -12   4   5   10.50    1.70
 -11  -4   5    4.40    2.40
 -11  -4   5    5.00    2.10
 -11   4   5    2.60    2.00
 -11   4   5    5.90    2.40
 -10  -4   5  246.88    9.40
 -10  -4   5  250.07    8.40
 -10   4   5  242.18    8.60
 -10   4   5  239.68    8.20
  -9  -4   5  348.87   10.80
  -9  -4   5  331.77   10.40
  -9  -4   5  344.47   11.60
  -9   4   5  328.67   10.70
  -9   4   5  334.47   10.40
  -8  -4   5  426.66   12.40
  -8  -4   5  417.06   12.30
  -8   4   5  416.26   12.50
  -8   4   5  412.36   12.40
  -7  -4   5   39.60    4.60
  -7  -4   5   33.90    3.70
  -7   4   5   31.80    4.30
  -7   4   5   29.00    4.90
  -6  -4   5  142.29    7.20
  -6  -4   5  144.29    7.10
  -6   4   5  137.79    6.70
   6   4  -5  145.19    7.50
   5  -4  -5  638.94   35.40
  -5  -4   5  639.94   16.40
  -5   4   5  626.84   16.90
   5   4  -5  624.74   17.50
   5   4  -5  629.64   17.00
  -4  -4   5  100.49    4.50
   4  -4  -5   95.09    8.20
   4  -4  -5   99.79   12.90
   4   4  -5   94.19    4.90
   4   4  -5   98.49    4.60
  -4   4   5  100.39    5.70
  -3  -4   5   44.60    3.50
   3  -4  -5   41.60    4.80
   3  -4  -5   43.00    8.60
   3   4  -5   42.40    3.30
  -3   4   5   50.09    4.60
   3   4  -5   48.30    3.00
   2  -4  -5 2234.68   69.09
   2  -4  -5 2135.69   51.39
   2   4  -5 2304.87   50.69
  -2   4   5 2111.29   50.49
   2   4  -5 2195.08   51.49
   1  -4  -5 5237.28  135.39
   1   4  -5 4904.01  112.69
  -1   4   5 4807.32  111.79
   0  -4   5 2854.51   69.39
   0  -4  -5 2831.42   63.09
   0   4  -5 2853.31   64.99
   0   4   5 2737.43   64.19
  -1  -4  -5    4.40    1.40
   1  -4   5    5.10    2.50
  -1   4  -5    4.30    1.10
  -2  -4  -5 5370.46  120.69
   2  -4   5 5266.47  119.99
   2  -4   5 5443.36  135.89
  -2   4  -5 5256.57  121.39
   2   4   5 5439.86  120.49
   2   4   5 5561.54  120.99
   2   4   5 5378.16  120.39
   3  -4   5 1505.75   50.99
   3  -4   5 1478.95   33.80
  -3  -4  -5 1594.44   63.39
   3  -4   5 1392.76   34.20
  -3  -4  -5 1320.97   34.50
   3   4   5 1470.95   34.20
   3   4   5 1483.95   34.80
   3   4   5 1490.05   34.50
  -3   4  -5 1438.36   34.20
  -3   4  -5 1404.06   34.20
  -3   4  -5 1497.25   34.90
   4  -4   5  164.58    7.10
  -4  -4  -5  185.58    6.40
   4  -4   5  172.38   17.60
  -4   4  -5  193.58    7.50
   4   4   5  178.98    6.70
   4   4   5  179.38    6.30
   4   4   5  188.38    7.80
  -4   4  -5  177.48    6.50
  -4   4  -5  184.88    6.50
   5  -4   5  364.56   29.30
  -5  -4  -5  402.26   11.10
   5   4   5  404.26   11.20
   5   4   5  380.56   11.80
  -5   4  -5  400.36   11.20
  -5   4  -5  397.26   11.20
  -6  -4  -5  457.95   12.70
  -6   4  -5  454.05   12.70
   6   4   5  437.86   13.20
   6   4   5  458.55   12.70
  -6   4  -5  452.05   12.60
  -7  -4  -5 2107.69   49.60
  -7   4  -5 2079.59   51.09
   7   4   5 2151.48   49.90
  -7   4  -5 2111.99   49.60
   7   4   5 2152.68   49.70
  -8  -4  -5 1866.71   43.60
  -8   4  -5 1803.22   43.40
   8   4   5 1815.52   43.50
   8   4   5 1842.32   43.50
  -9  -4  -5  141.29    5.70
   9   4   5  137.09    7.50
   9   4   5  151.98    5.70
  -9   4  -5  138.89    5.60
 -10  -4  -5  326.87    9.70
 -10   4  -5  311.47    9.60
  10   4   5  330.77    9.70
 -11  -4  -5    1.00    1.50
  11  -4   5    0.30    1.30
 -11   4  -5   -1.50    1.30
  11   4   5   -1.00    1.40
 -12  -4  -5   15.70    2.90
  12  -4   5   14.90    2.30
 -12   4  -5   23.30    2.30
  12   4   5   21.20    2.80
 -13  -5   5   89.19    3.60
  13   5  -5   88.09    4.00
 -13   5   5   87.79    3.40
 -12  -5   5  296.67    8.20
 -12  -5   5  302.07    9.00
 -12   5   5  287.27    8.00
 -12   5   5  304.27    8.70
  12   5  -5  300.37    8.70
 -11  -5   5    6.80    2.30
 -11  -5   5    6.40    2.40
 -11   5   5    7.90    2.00
 -11   5   5    2.70    1.90
 -10  -5   5   43.20    4.00
 -10  -5   5   46.10    5.00
 -10   5   5   39.20    4.20
  10   5  -5   40.80    5.80
 -10   5   5   33.80    4.50
  -9  -5   5 1147.19   29.30
  -9  -5   5 1122.99   27.70
  -9  -5   5 1146.09   28.40
  -9   5   5 1135.09   28.30
  -9   5   5 1111.09   27.70
  -8  -5   5   45.80    5.00
  -8  -5   5   48.70    4.60
  -8  -5   5   49.00    4.30
  -8   5   5   41.30    4.30
  -7  -5   5   54.99    5.10
  -7  -5   5   65.29    4.50
  -7   5   5   51.79    5.30
  -7   5   5   58.49    4.70
  -6  -5   5  135.59    6.90
  -6  -5   5  136.89    5.90
  -6   5   5  149.49    9.80
  -6   5   5  136.29    6.30
  -6   5   5  133.99    6.10
  -5  -5   5  727.93   19.40
  -5   5   5  745.33   19.20
  -5   5   5  739.83   19.40
  -5   5   5  741.23   18.60
   4  -5  -5    0.10    6.30
  -4  -5   5   -0.40    1.60
  -4   5   5    1.80    2.50
   4   5  -5    0.40    2.60
   4   5  -5   -0.60    2.10
   4   5  -5    3.20    2.10
   3  -5  -5  685.13   35.30
  -3  -5   5  694.13   17.20
   3   5  -5  693.03   17.90
  -3   5   5  682.83   17.60
   3   5  -5  667.73   17.30
   3   5  -5  674.93   18.80
   2  -5  -5 1538.55   57.49
  -2  -5   5 1556.04   35.80
  -2   5   5 1538.95   36.30
   2   5  -5 1491.15   35.90
   2   5  -5 1497.25   37.40
   2   5  -5 1609.74   36.60
   1  -5  -5    2.30    5.50
  -1  -5   5   -0.10    3.30
  -1  -5   5    2.20    1.50
   1   5  -5    0.50    1.40
   1   5  -5    2.40    1.50
   0  -5   5   10.30    1.60
   0  -5  -5    6.00    6.20
   0  -5   5   14.20    5.70
   0   5  -5   14.10    2.70
   0   5  -5    9.90    1.80
   0   5   5    8.60    2.10
   1  -5   5  376.96    9.90
   1  -5   5  374.56   18.00
   1  -5   5  368.96   10.80
   1   5   5  373.76   10.90
  -1   5  -5  363.06   10.30
  -1   5  -5  378.36   11.20
   2  -5   5   93.49    3.90
   2  -5   5   95.49   11.30
   2  -5   5   83.59    5.70
  -2   5  -5   86.59    4.30
   2   5   5   87.69    3.80
  -2   5  -5   89.69    4.80
   2   5   5   80.39    5.00
   2   5   5   83.09    5.10
   3  -5   5   22.30    7.90
   3  -5   5   26.60    2.60
   3   5   5   30.00    4.20
   3   5   5   23.00    3.40
  -3   5  -5   23.70    3.70
  -3   5  -5   28.20    3.20
   3   5   5   20.20    4.30
   3   5   5   23.10    2.60
  -3   5  -5   35.20    4.30
   4  -5   5 2257.97   79.19
  -4  -5  -5 2426.86   54.09
  -4   5  -5 2345.37   53.79
   4   5   5 2249.77   54.69
   4   5   5 2288.27   54.19
  -4   5  -5 2383.56   53.89
   4   5   5 2420.06   54.49
  -5  -5  -5 2093.49   48.00
   5   5   5 2046.50   48.20
  -5   5  -5 2072.69   47.80
   5   5   5 2044.30   47.90
  -5   5  -5 2022.20   47.80
  -6  -5  -5  246.18    8.20
  -6   5  -5  240.58    8.10
  -6   5  -5  237.08    8.60
   6   5   5  246.68    8.30
   6   5   5  238.48    8.80
  -7  -5  -5 1146.19   28.20
   7   5   5 1127.79   28.30
   7   5   5 1145.19   28.20
  -7   5  -5 1140.99   28.10
  -8  -5  -5  176.28    7.00
   8   5   5  189.08    7.30
  -8   5  -5  163.08    6.70
   8   5   5  164.98    7.40
  -9  -5  -5  756.32   19.40
  -9   5  -5  753.22   19.40
   9   5   5  749.73   19.40
   9   5   5  761.82   19.70
  10  -5   5  267.47    7.70
 -10  -5  -5  259.87    8.10
  10   5   5  269.87    8.30
 -10   5  -5  260.37    8.10
  11  -5   5  141.99    5.70
 -11  -5  -5  127.39    4.90
 -11   5  -5  125.59    4.70
  11   5   5  122.69    4.70
 -12  -6   5    6.10    1.60
 -12  -6   5    6.60    1.30
 -12   6   5    7.20    1.30
  12   6  -5    8.40    1.60
 -11  -6   5   -0.10    1.60
 -11  -6   5    1.40    1.50
  11  -6  -5   -3.10    1.80
 -11   6   5    1.50    1.30
  11   6  -5    1.60    1.50
 -10  -6   5    3.00    2.20
 -10  -6   5    2.80    2.40
 -10   6   5    2.20    1.90
  -9  -6   5    8.90    1.90
  -9  -6   5   14.60    2.60
  -9  -6   5    6.90    2.80
  -9   6   5   12.70    2.50
   9   6  -5   10.70    2.40
  -8  -6   5  163.48    7.70
  -8  -6   5  154.08    6.80
  -8  -6   5  156.48    7.00
  -8   6   5  164.38    7.00
  -8   6   5  168.88    6.90
  -7  -6   5  101.89    5.90
  -7  -6   5   98.29    5.50
  -7   6   5   91.59    8.20
  -7   6   5  102.09    5.60
  -6  -6   5  178.18    7.60
  -6  -6   5  188.08    7.10
  -6   6   5  170.78    6.70
  -6   6   5  165.98    7.00
  -6   6   5  176.68    8.00
  -5  -6   5  535.15   15.40
  -5   6   5  546.55   14.50
  -5   6   5  573.94   15.50
  -4  -6   5  278.27    8.60
  -4  -6   5  267.57    8.10
  -4  -6   5  266.77   10.00
   4   6  -5  259.17    8.90
  -4   6   5  282.57    9.30
  -3  -6   5   13.00    2.20
  -3   6   5   18.70    2.60
   3   6  -5   18.10    2.70
  -2  -6   5   72.29    4.00
   2   6  -5   71.89    4.30
  -2   6   5   67.09    4.60
   2   6  -5   66.89    4.60
   1  -6  -5   15.40    8.50
  -1  -6   5   22.80    2.90
  -1   6   5   20.80    2.70
   1   6  -5   18.00    3.50
   1   6  -5   23.50    3.10
   1   6  -5   12.80    2.30
   0  -6   5 1799.62   41.20
   0   6  -5 1769.12   43.30
   0   6  -5 1777.92   41.60
   0   6   5 1776.22   42.00
   1  -6   5   17.10    2.50
   1  -6   5   15.80    2.30
   1   6   5   19.60    2.70
  -1   6  -5   13.00    2.40
  -1   6  -5   18.30    2.90
   2   6   5  277.27    9.80
  -2   6  -5  285.37   10.20
   2   6   5  321.87    9.80
   2   6   5  300.07    9.40
   3  -6   5   23.20    2.70
   3   6   5   19.70    5.30
   3   6   5   20.80    3.10
   3   6   5   25.80    4.20
  -3   6  -5   24.20    3.20
  -3   6  -5   21.80    3.10
   4  -6   5  615.04   15.80
  -4  -6  -5  616.84   16.40
   4   6   5  619.54   16.30
  -4   6  -5  625.94   16.30
   4   6   5  617.04   16.70
  -4   6  -5  627.54   16.40
   4   6   5  613.74   17.10
   5  -6   5 1575.84   37.70
  -5  -6  -5 1635.84   38.40
   5   6   5 1625.64   38.30
  -5   6  -5 1638.94   38.30
   5   6   5 1633.14   38.70
  -5   6  -5 1572.24   38.10
  -6  -6  -5 1320.47   31.60
   6  -6   5 1313.47   31.00
   6   6   5 1287.97   31.80
   6   6   5 1326.07   31.70
  -6   6  -5 1262.87   31.40
  -6   6  -5 1288.97   31.40
   7  -6   5    3.70    1.70
  -7  -6  -5    4.60    2.10
  -7   6  -5    4.40    2.00
   7   6   5    4.70    2.40
   7   6   5    3.70    2.30
   8  -6   5   46.80    2.90
  -8  -6  -5   47.00    3.40
  -8   6  -5   48.80    3.30
   8   6   5   47.90    4.70
   8   6   5   51.39    3.50
   9  -6   5  430.46   11.30
  -9  -6  -5  403.96   11.60
   9   6   5  425.66   11.80
  -9   6  -5  413.86   11.60
   9   6   5  421.16   11.80
 -10  -6  -5   22.70    2.90
  10  -6   5   24.40    2.30
  10   6   5   24.50    3.80
  10   6   5   26.90    2.50
  11  -6   5   42.60    2.60
 -11  -6  -5   41.60    3.60
  11   6   5   46.50    2.90
 -12  -7   5   36.70    2.40
  12   7  -5   31.50    2.50
 -11  -7   5   32.20    3.20
 -11  -7   5   30.70    2.80
  11   7  -5   26.30    2.60
 -11   7   5   34.00    2.40
  11   7  -5   22.70    3.30
 -10  -7   5   25.00    3.20
 -10  -7   5   23.30    3.20
  10  -7  -5   26.80    3.50
  10   7  -5   27.90    2.90
 -10   7   5   30.40    2.60
  -9  -7   5  367.16   10.90
   9  -7  -5  363.56   10.10
  -9  -7   5  355.66   10.90
  -9  -7   5  376.46   12.10
   9   7  -5  367.76   11.00
  -9   7   5  371.66   11.20
  -8  -7   5    7.20    2.40
   8  -7  -5    5.30    2.00
  -8  -7   5    5.00    2.60
  -8  -7   5    6.60    2.80
  -8   7   5    7.70    2.50
  -8   7   5    8.60    2.30
   7  -7  -5  381.46   11.30
  -7  -7   5  408.76   12.30
  -7  -7   5  397.76   12.00
  -7   7   5  405.66   12.00
  -7   7   5  402.26   11.40
  -6  -7   5  910.01   23.50
  -6  -7   5  941.11   23.80
  -6   7   5  939.51   24.10
  -6   7   5  937.01   23.70
  -6   7   5  925.11   22.90
  -5  -7   5  223.68    9.20
  -5  -7   5  236.58    8.20
   5   7  -5  227.98    9.10
  -5   7   5  229.38    8.40
  -5   7   5  237.58    8.90
  -5   7   5  241.08    7.80
  -4  -7   5 1412.76   33.20
  -4  -7   5 1336.27   33.30
   4   7  -5 1355.16   33.00
  -4   7   5 1389.06   33.20
  -4   7   5 1378.36   33.60
  -3  -7   5  156.28    6.10
  -3  -7   5  164.18    5.70
  -3  -7   5  160.88    8.30
   3   7  -5  152.48    6.30
  -3   7   5  176.78    7.00
  -2  -7   5    3.70    1.80
  -2  -7   5    3.80    3.90
  -2   7   5    5.10    2.30
  -1  -7   5  100.99    4.60
  -1  -7   5  109.39    4.80
  -1   7   5   98.69    7.30
  -1   7   5  102.69    5.50
   1   7  -5  102.79    5.00
   0  -7   5  527.15   13.70
   0   7   5  531.85   15.10
   0   7  -5  514.45   14.10
   0   7   5  519.15   14.60
   0   7   5  486.55   14.60
   1  -7   5  241.08    7.50
   1   7   5  250.27    8.70
   1   7   5  242.88    8.70
  -1   7  -5  231.58    8.00
   2  -7   5    1.30    1.40
  -2   7  -5    9.00    3.30
   2   7   5    6.10    2.50
  -2   7  -5    1.90    1.70
   2   7   5    3.70    3.00
   2   7   5   -1.30    2.20
   3  -7   5  353.86   10.00
   3   7   5  336.17   10.50
  -3   7  -5  358.96   11.40
  -3   7  -5  349.47   10.60
   3   7   5  350.66   11.00
   3   7   5  350.16   11.20
  -4  -7  -5   61.09    4.60
   4  -7   5   64.79    3.90
   4   7   5   62.79    4.80
  -4   7  -5   85.79    6.20
  -4   7  -5   72.09    4.70
   4   7   5   66.59    5.70
   4   7   5   74.19    5.80
   5  -7   5   68.79    4.00
  -5  -7  -5   65.19    4.50
   5   7   5   75.99    5.20
  -5   7  -5   77.99    5.10
   5   7   5   79.09    5.00
  -6  -7  -5 1087.99   26.70
   6  -7   5 1079.69   26.10
  -6   7  -5 1065.39   26.60
  -6   7  -5 1088.79   27.10
   6   7   5 1067.59   26.60
   6   7   5 1055.09   26.90
   7  -7   5    0.90    1.30
   7   7   5    2.50    1.60
   7   7   5    2.90    2.30
   8  -7   5  410.06   11.20
  -8  -7  -5  412.26   11.60
   8   7   5  420.26   11.70
   8   7   5  423.46   12.20
   9  -7   5   40.10    2.60
  -9  -7  -5   36.00    3.20
   9   7   5   41.00    2.90
   9   7   5   32.10    3.00
 -10  -7  -5  101.39    4.70
  10   7   5  119.29    5.30
  10   7   5  112.39    4.50
 -10  -8   5  124.99    5.10
  10   8  -5  118.59    4.70
  10   8  -5  116.19    4.50
 -10   8   5  143.49    4.90
  -9  -8   5   12.90    1.80
  -9  -8   5   13.60    2.10
   9   8  -5   17.50    2.50
  -8  -8   5    0.20    2.30
  -8  -8   5    3.80    1.70
  -8   8   5    5.90    2.10
  -8   8   5    3.20    2.30
   8   8  -5    1.10    1.80
  -7  -8   5    5.40    4.00
  -7   8   5    0.80    2.00
  -7   8   5    6.50    2.20
  -6  -8   5  501.25   14.40
  -6  -8   5  522.65   16.10
  -6   8   5  492.05   14.80
  -6   8   5  503.05   13.50
  -6   8   5  478.25   14.10
  -5  -8   5  199.78    7.70
  -5   8   5  202.48    8.00
   5   8  -5  197.68    8.60
  -5   8   5  199.88    8.40
  -5   8   5  203.88    7.10
  -4  -8   5   55.79    4.30
  -4   8   5   48.20    5.00
  -4   8   5   41.90    3.90
  -4   8   5   49.50    5.30
   4   8  -5   41.30    4.90
  -3  -8   5   15.70    2.40
  -3   8   5   14.60    2.70
   3   8  -5   15.30    2.80
  -3   8   5   17.10    3.70
  -2  -8   5  177.48    6.70
   2   8  -5  169.08    6.80
  -2   8   5  175.68    7.50
  -2   8   5  177.18    7.30
  -1  -8   5   58.69    4.00
  -1   8   5   63.89    4.90
  -1   8   5   66.89    5.50
  -1   8   5   51.89    6.80
   1   8  -5   57.39    4.20
   0  -8   5 1416.26   33.30
   0   8   5 1334.97   33.60
   0   8  -5 1394.36   33.70
   0   8   5 1422.96   34.30
   1  -8   5  377.26   10.80
  -1   8  -5  371.66   11.30
   1   8   5  380.16   11.60
   1   8   5  360.96   10.80
   1   8   5  381.66   11.90
   2  -8   5  158.68    6.00
  -2   8  -5  168.38    6.70
   2   8   5  157.08    6.90
   2   8   5  162.18    7.20
   2   8   5  159.58    7.10
  -3  -8  -5  175.98    7.80
   3  -8   5  158.18    6.10
  -3   8  -5  165.48    6.80
   3   8   5  159.58    7.10
   3   8   5  164.48    7.50
  -4  -8  -5  450.65   12.80
   4  -8   5  442.86   12.20
  -4   8  -5  442.26   13.10
  -4   8  -5  433.86   12.80
   4   8   5  436.26   13.00
   4   8   5  429.06   12.60
   4   8   5  433.26   13.50
  -5  -8  -5  530.15   14.80
   5  -8   5  542.95   14.40
   5   8   5  518.75   14.70
   5   8   5  526.25   15.00
  -5   8  -5  551.34   15.10
  -5   8  -5  543.85   15.10
  -6  -8  -5  246.98    7.90
   6  -8   5  244.98    7.60
  -6   8  -5  233.68    7.90
   6   8   5  251.57    8.70
   6   8   5  239.98    7.80
  -6   8  -5  265.47    9.20
  -7  -8  -5    3.90    1.60
   7  -8   5    6.30    1.30
   7   8   5    6.90    1.70
   7   8   5    3.80    2.30
  -8  -8  -5   48.30    3.40
   8  -8   5   53.09    2.90
   8   8   5   51.09    3.30
   8   8   5   51.79    3.20
  -9  -8  -5  100.89    4.70
   9  -8   5  106.59    3.90
   9   8   5  107.09    4.10
   9   8   5  111.39    4.70
  10  -8   5   88.89    3.20
  10   8   5   83.49    3.50
  10   8   5   78.19    3.50
 -10  -9   5    7.10    1.30
  10   9  -5    9.10    1.60
  10   9  -5   10.70    1.40
  -9  -9   5   52.29    3.30
  -9  -9   5   56.09    3.50
   9   9  -5   62.29    3.10
  -8  -9   5    8.50    1.90
  -8  -9   5    5.80    1.70
  -8   9   5    6.40    1.60
   8   9  -5    5.00    1.60
  -7  -9   5   33.50    3.30
   7   9  -5   37.80    3.70
  -7   9   5   30.20    3.40
  -6  -9   5   95.49    4.70
  -6   9   5   90.59    5.40
  -6   9   5  102.69    4.70
  -6   9   5  122.19    6.70
  -5  -9   5   80.49    5.20
  -5   9   5   74.19    4.30
  -5   9   5   72.39    4.70
   5   9  -5   77.29    5.40
  -5   9   5   81.29    5.70
  -4  -9   5    6.70    2.30
   4   9  -5   10.80    3.10
  -4   9   5    3.40    2.80
  -4   9   5    8.00    2.00
  -4   9   5    2.80    2.60
  -3  -9   5  174.38    7.10
  -3   9   5  180.08    7.60
  -3   9   5  182.58    7.90
   3   9  -5  175.98    7.30
  -3   9   5  177.68    6.50
  -2  -9   5  501.55   14.00
  -2   9   5  496.75   14.30
  -2   9   5  490.75   14.80
   2   9  -5  495.15   14.20
  -1  -9   5  157.38    6.40
  -1   9   5  150.58    6.00
   1   9  -5  145.39    6.50
  -1   9   5  157.88    8.20
  -1   9   5  155.48    7.30
   0  -9   5   75.79    4.60
   0   9  -5   80.29    4.90
   0   9   5   78.89    5.90
   0   9   5   77.29    5.70
   0   9   5   79.19    4.50
   1  -9   5  166.98    6.50
  -1   9  -5  166.48    7.10
   1   9   5  175.18    7.60
   1   9   5  164.98    7.30
   1   9   5  168.38    6.40
   2  -9   5   63.69    4.20
  -2   9  -5   60.59    4.70
   2   9   5   52.79    5.20
   2   9   5   53.99    4.70
   2   9   5   57.09    4.80
   3  -9   5   37.90    3.50
  -3  -9  -5   36.70    5.00
   3   9   5   35.90    5.10
   3   9   5   40.40    4.40
  -3   9  -5   35.70    4.10
   4  -9   5   27.10    2.60
  -4  -9  -5   25.60    2.90
   4   9   5   27.20    4.30
   4   9   5   36.90    4.10
  -4   9  -5   32.40    3.20
  -5  -9  -5  111.99    4.80
   5  -9   5  118.49    4.60
   5   9   5  125.29    5.90
  -5   9  -5  113.29    5.00
   5   9   5  114.89    5.10
  -6  -9  -5    3.80    1.60
   6  -9   5    3.30    1.20
  -6   9  -5    4.10    2.40
   6   9   5    3.20    2.10
   6   9   5    3.20    2.10
   7  -9   5   45.70    2.70
  -7  -9  -5   40.10    3.30
   7   9   5   38.00    3.00
   7   9   5   41.40    3.40
  -8  -9  -5  249.08    7.70
   8  -9   5  271.67    7.40
   8   9   5  260.27    7.60
   8   9   5  268.97    7.70
   9  -9   5    2.30    1.30
   9   9   5    3.70    1.80
   9   9   5    3.10    1.30
  -9 -10   5  190.48    6.00
   9  10  -5  194.08    5.60
  -9  10   5  180.28    5.60
   9  10  -5  185.28    5.70
  -8 -10   5  241.78    7.40
  -8 -10   5  250.57    7.70
   8  10  -5  240.08    7.20
  -8  10   5  229.48    7.10
   8  10  -5  240.68    7.10
  -8  10   5  238.58    6.50
  -7 -10   5   20.00    2.80
  -7  10   5   16.70    2.10
   7  10  -5   24.90    2.30
  -7  10   5   20.80    2.10
  -6 -10   5   12.10    1.80
   6  10  -5   14.00    1.90
  -6  10   5   11.00    2.60
  -5 -10   5  105.49    4.70
  -5  10   5  103.99    4.70
  -5  10   5   89.29    5.20
  -5  10   5  103.29    5.10
  -4 -10   5  263.97    8.70
  -4  10   5  273.27    8.40
   4  10  -5  269.27    8.70
  -4  10   5  271.27    9.00
  -4  10   5  263.67    9.00
  -3 -10   5  120.79    5.10
  -3  10   5  116.39    5.50
  -3  10   5  123.39    5.10
  -3  10   5  118.19    5.90
   3  10  -5  112.49    5.40
  -2 -10   5    5.40    1.60
  -2  10   5    5.50    2.00
   2  10  -5   10.50    2.10
  -2  10   5    8.10    2.00
  -1 -10   5    2.00    1.50
  -1  10   5    1.80    1.90
   1  10  -5    1.30    1.70
  -1  10   5    2.90    1.90
   0 -10   5  581.94   15.50
   0  10   5  596.14   15.10
   0  10  -5  572.64   15.80
   0  10   5  579.14   15.90
   0  10   5  563.64   16.20
   1 -10   5   69.09    3.70
   1  10   5   67.49    4.50
   1  10   5   65.19    4.30
  -1  10  -5   69.09    4.00
   1  10   5   68.89    5.20
  -2 -10  -5  326.67   10.10
   2 -10   5  298.77    9.10
   2  10   5  305.97    9.30
  -2  10  -5  306.07    9.60
   2  10   5  305.67    9.90
   2  10   5  304.67    9.90
   3 -10   5   91.09    4.00
  -3 -10  -5   81.09    4.20
  -3  10  -5   90.59    4.50
   3  10   5   90.09    4.90
   3  10   5   92.29    5.20
  -4 -10  -5  484.75   13.30
   4 -10   5  504.75   13.30
   4  10   5  495.65   13.90
   4  10   5  525.75   14.10
  -4  10  -5  494.65   13.60
  -5 -10  -5  155.68    5.60
   5 -10   5  162.98    5.50
  -5  10  -5  154.88    5.80
   5  10   5  157.98    5.70
   6 -10   5   87.59    3.60
  -6  10  -5   81.09    4.80
   6  10   5   86.69    3.90
   7  10   5   29.10    2.20
   8 -10   5   38.00    2.50
   8  10   5   37.50    2.30
  -7 -11   5    0.90    1.50
  -7 -11   5    2.10    1.30
  -7  11   5   -0.30    1.10
  -7  11   5    0.80    1.10
   7  11  -5    1.50    1.10
   7  11  -5   -0.70    2.20
  -6 -11   5  114.69    4.50
  -6  11   5   99.29    5.40
  -6  11   5  109.39    3.70
   6  11  -5  105.89    4.80
  -6  11   5  108.89    4.20
   6  11  -5  116.49    4.20
  -5 -11   5    8.60    1.60
   5  11  -5    8.90    1.50
  -5  11   5    7.70    1.20
  -5  11   5   11.20    2.10
  -4 -11   5  100.49    4.50
   4  11  -5   98.29    5.30
  -4  11   5  101.69    3.80
  -4  11   5   96.59    4.70
   4  11  -5  101.09    4.20
  -3 -11   5    1.80    1.50
  -3  11   5    0.10    1.20
  -3  11   5    2.20    1.90
   3  11  -5    3.30    2.10
   3  11  -5   -0.10    1.40
  -2 -11   5  533.95   14.20
  -2  11   5  518.95   14.70
   2  11  -5  539.15   13.80
  -2  11   5  507.55   14.50
   2  11  -5  540.55   14.50
  -1 -11   5   15.40    2.50
  -1  11   5   13.40    2.20
  -1  11   5   16.20    2.40
   1  11  -5   12.90    2.00
   1  11  -5   13.40    1.90
   0 -11   5   24.20    2.60
   0  11   5   22.10    3.20
   0  11  -5   18.40    2.90
   0  11   5   18.70    2.60
   1 -11   5    2.80    1.40
   1  11   5    5.30    2.00
   1  11   5    2.80    1.50
  -1  11  -5    3.70    1.70
   1  11   5    2.00    2.00
   2 -11   5    4.90    1.40
  -2 -11  -5    4.10    1.70
   2  11   5    8.40    1.70
   2  11   5    7.40    1.70
   2  11   5    7.50    2.10
  -2  11  -5   10.00    1.80
   3 -11   5   45.40    2.90
  -3 -11  -5   49.60    3.10
   3  11   5   45.90    3.00
  -3  11  -5   48.30    3.30
   3  11   5   38.50    4.00
   4 -11   5  279.07    8.00
   4  11   5  274.37    8.10
  -4  11  -5  266.67    8.20
  -5 -11  -5   63.09    4.50
   5 -11   5   53.59    2.90
   5  11   5   53.59    2.90
  -5  11  -5   52.99    3.70
   6  11   5    6.40    1.20
  -5 -12   5   28.20    2.80
  -5  12   5   24.80    1.60
   5  12  -5   26.70    2.00
  -5  12   5   22.10    3.80
  -4 -12   5   52.39    3.10
   4  12  -5   53.39    2.70
  -4  12   5   53.19    3.50
  -4  12   5   50.89    2.30
  -3 -12   5   32.90    2.90
   3  12  -5   39.60    2.60
   3  12  -5   36.00    3.80
  -3  12   5   34.60    2.10
  -3  12   5   34.70    3.20
  -2 -12   5    4.60    1.50
  -2  12   5    6.80    1.70
  -2  12   5    8.00    1.20
   2  12  -5    4.40    1.60
   2  12  -5    8.40    1.90
  -1 -12   5   39.40    2.90
   1  12  -5   29.30    3.10
  -1  12   5   36.50    2.20
  -1  12   5   33.50    3.10
   0 -12   5  413.16   11.20
   0  12   5  419.76   10.60
   0  12  -5  412.86   11.50
   0  12   5  416.06   11.70
  -1 -12  -5   16.40    1.90
   1 -12   5   20.90    2.50
   1  12   5   24.30    2.20
  -1  12  -5   22.70    2.70
   1  12   5   26.60    3.10
   1  12   5   21.40    2.30
  -2 -12  -5  221.48    6.60
   2 -12   5  217.38    6.70
   2  12   5  214.28    6.40
  -2  12  -5  224.08    7.00
   2  12   5  217.38    7.10
   3 -12   5    0.30    1.30
   3  12   5    1.40    1.30
  -3  12  -5    1.10    1.70
   4 -12   5  173.68    5.50
   4  12   5  180.18    5.30
  -4  12  -5  179.28    5.80
 -14   0   6  113.49    3.70
 -14   0   6  113.19    4.00
 -13   0   6    0.20    1.20
 -13   0   6    2.10    1.30
 -12   0   6   16.60    2.60
 -12   0   6   13.90    2.60
 -11   0   6    1.30    2.20
 -11   0   6    1.90    2.00
 -10   0   6 3791.12   85.89
 -10   0   6 3671.93   84.89
  -8   0   6 1785.22   42.30
  -8   0   6 1823.42   43.30
   7   0  -6    0.30    2.80
  -7   0   6   11.00    3.00
  -7   0   6    0.60    2.90
   6   0  -6 2725.83   63.09
   6   0  -6 2773.22   63.19
   6   0  -6 2747.63   80.89
   5   0  -6    0.90    3.10
   5   0  -6    1.10    1.20
   5   0  -6    1.00    1.20
   4   0  -6  267.37    8.20
   4   0  -6  268.77   13.20
   4   0  -6  275.97    7.60
   3   0  -6    0.50    0.80
   3   0  -6    1.20    1.50
   1   0  -6    0.40    0.70
  -1   0   6    0.70    1.90
   0   0  -6 1609.24   38.20
   0   0  -6 1640.44   37.40
   0   0   6 1614.84   44.60
  -1   0  -6    1.30    0.80
   1   0   6    1.80    3.00
   2   0   6  306.47   21.50
  -2   0  -6  413.76   10.70
   3   0   6    0.20    8.30
   3   0   6    0.30    1.50
  -3   0  -6   -1.20    1.90
  -3   0  -6    0.40    1.10
  -4   0  -6  842.32   21.10
   4   0   6  814.62   20.10
  -4   0  -6  810.92   20.10
  -5   0  -6    1.60    1.60
   5   0   6    2.80    1.60
  -5   0  -6   -2.30    2.00
   6   0   6 1375.16   32.20
  -6   0  -6 1364.16   32.30
  -6   0  -6 1311.27   32.30
   7   0   6   -0.70    1.70
  -7   0  -6   -3.10    2.60
  -8   0  -6  699.63   18.30
   8   0   6  691.63   18.30
  -8   0  -6  721.33   18.70
  -9   0  -6   -2.10    2.00
  -9   0  -6    0.60    1.90
   9   0   6    3.30    2.30
 -10   0  -6  507.75   13.80
  10   0   6  512.55   13.70
 -10   0  -6  501.55   14.00
 -11   0  -6   -0.10    1.30
  11   0   6    2.20    2.20
 -12   0  -6  585.64   16.80
 -14  -1   6  182.48    5.50
 -14   1   6  178.58    5.40
 -14   1   6  172.78    5.10
 -13  -1   6  198.88    6.20
 -13  -1   6  195.68    6.50
 -13   1   6  200.88    6.50
 -13   1   6  198.68    6.00
 -12  -1   6  407.16   12.10
 -12  -1   6  388.26   11.30
 -12   1   6  390.06   11.50
 -12   1   6  395.56   11.90
 -11  -1   6   11.50    2.50
 -11  -1   6   12.20    2.80
 -11   1   6    9.50    2.30
 -11   1   6   11.30    2.50
 -10  -1   6 2148.09   50.79
 -10  -1   6 2211.28   51.79
 -10   1   6 2178.88   50.69
 -10   1   6 2170.18   51.59
  -9  -1   6  437.76   15.70
  -9  -1   6  434.56   13.30
  -8  -1   6  228.38    7.90
  -8   1   6  223.88    7.90
  -8   1   6  227.18    8.50
  -7  -1   6  658.53   17.40
   7  -1  -6  599.44   47.30
  -7  -1   6  650.43   18.10
  -7   1   6  654.53   17.30
  -7   1   6  654.03   17.90
   7   1  -6  742.23   20.90
   6  -1  -6 2614.24   58.39
  -6  -1   6 2460.55   58.09
   6  -1  -6 2443.56   77.79
   6   1  -6 2576.04   58.99
   6   1  -6 2628.34   59.19
   5  -1  -6   38.90    2.60
   5  -1  -6   40.70    3.00
   5  -1  -6   42.50    7.80
   5   1  -6   41.00    6.30
   5   1  -6   39.50    3.00
   5   1  -6   42.30    3.10
   4  -1  -6 3657.63   97.49
   4  -1  -6 3803.72   85.39
   4  -1  -6 3836.22   84.49
   4   1  -6 3821.02   84.99
   4   1  -6 3692.83   88.89
   3  -1  -6   11.70    3.80
   3  -1  -6    9.40    1.30
   3  -1  -6    9.00    1.80
   3   1  -6    9.90    1.80
   1  -1  -6  395.86   10.10
   1   1  -6  390.66   11.00
   0  -1  -6  274.87    7.70
   0  -1   6  284.97   10.70
   0   1   6  277.27   15.00
   0   1  -6  280.77    8.10
   0   1  -6  274.67    8.30
  -1  -1  -6  261.07   15.70
   1  -1   6  220.18   14.10
  -1  -1  -6  236.78    7.20
   1   1   6  247.08   15.30
  -1   1  -6  248.28    7.60
  -1   1  -6  237.78    7.50
  -2  -1  -6 1507.95   38.00
   2   1   6 1684.73   55.19
  -2   1  -6 1694.33   38.60
   3  -1   6 1652.53   39.20
  -3  -1  -6 1755.02   39.40
  -3   1  -6 1675.03   41.90
   3   1   6 1723.63   39.30
  -4  -1  -6    5.30    1.60
   4  -1   6    5.50    1.90
   4   1   6    2.30    1.70
  -4   1  -6    2.80    1.70
  -4   1  -6    3.90    1.40
  -5  -1  -6   92.29    4.40
  -5   1  -6   87.09    6.90
   5   1   6   89.09    4.40
  -5   1  -6   89.49    4.40
  -6  -1  -6  118.99    7.40
  -6  -1  -6  128.99    5.30
  -6   1  -6  122.29    5.20
  -6   1  -6  114.49    5.90
   6   1   6  123.39    5.30
   7  -1   6   35.40    3.90
  -7  -1  -6   34.00    3.40
  -7  -1  -6   34.80    5.40
  -7   1  -6   31.90    3.40
   7   1   6   35.70    3.70
  -7   1  -6   34.10    4.10
  -8  -1  -6  345.57   10.70
   8  -1   6  346.57   10.70
  -8  -1  -6  357.66   10.90
  -8   1  -6  363.66   10.90
  -8   1  -6  346.67   10.60
   8   1   6  357.66   10.90
  -9  -1  -6   18.80    3.50
  -9  -1  -6   16.40    2.90
   9  -1   6   22.50    3.30
   9   1   6   26.20    3.90
  -9   1  -6   17.40    2.50
  -9   1  -6   16.60    2.70
 -10  -1  -6    6.10    1.60
  10  -1   6    8.70    2.30
  10   1   6    5.80    1.90
 -10   1  -6    4.90    1.40
 -11  -1  -6  159.18    5.70
 -11   1  -6  151.88    5.70
  11   1   6  157.18    5.80
 -12  -1  -6  377.36   10.30
  12   1   6  371.26   10.40
 -12   1  -6  392.66   10.50
 -14  -2   6  320.07    8.50
 -14   2   6  310.37    8.40
 -13  -2   6    2.00    1.20
 -13  -2   6    3.90    1.30
 -13   2   6    3.20    1.20
 -13   2   6    4.30    1.30
 -12   2   6  753.92   18.80
 -11  -2   6  344.77   10.40
 -11  -2   6  345.77   11.30
 -11   2   6  342.17   11.00
 -11   2   6  343.87   10.30
 -10  -2   6 1486.45   36.60
 -10  -2   6 1476.35   35.50
 -10   2   6 1475.55   36.10
 -10   2   6 1481.55   35.30
  -9  -2   6  149.69    7.20
  -9  -2   6  140.59    6.30
  -9   2   6  152.18    6.90
  -9   2   6  148.79    6.60
  -8  -2   6   26.40    4.00
  -8  -2   6   28.00    4.90
  -8   2   6   26.30    4.40
  -8   2   6   26.50    3.30
   7  -2  -6  199.38   23.60
  -7  -2   6  214.88    7.70
  -7  -2   6  214.38    8.80
  -7   2   6  210.48    8.00
  -7   2   6  207.28    8.20
  -6  -2   6  717.23   17.80
   6  -2  -6  677.73   34.50
   6   2  -6  690.83   18.70
   6   2  -6  712.33   18.70
  -5  -2   6  614.04   16.10
   5  -2  -6  628.04   30.10
   5  -2  -6  651.83   15.40
   5  -2  -6  650.83   16.30
   5   2  -6  616.44   16.40
   5   2  -6  620.94   16.90
   4  -2  -6 1062.89   26.10
   4  -2  -6 1037.20   24.70
   4  -2  -6 1113.29   39.60
   4   2  -6 1077.89   25.90
   4   2  -6 1064.99   26.50
   3  -2  -6  417.36   10.10
   3  -2  -6  411.76   20.00
   3   2  -6  401.26   11.50
   2  -2  -6   40.10    6.20
   2  -2  -6   37.50    2.30
   2   2  -6   38.90    2.70
  -2   2   6   41.00    8.70
   1  -2  -6  916.91   21.10
  -1   2   6  884.41   33.80
   0  -2  -6 1096.59   24.80
   0   2   6 1116.49   38.90
   0   2  -6  962.90   26.50
  -1  -2  -6  476.35   12.10
  -1  -2  -6  396.06   24.20
  -1   2  -6  501.05   15.90
   1   2   6  495.65   24.80
  -2  -2  -6  409.36   11.80
  -2  -2  -6  401.86   11.70
  -2  -2  -6  466.95   25.60
   2   2   6  439.16   11.70
   2   2   6  429.06   26.30
  -2   2  -6  376.76   12.70
   3  -2   6 1027.20   24.80
  -3  -2  -6 1068.49   24.90
   3   2   6 1017.90   24.90
  -3   2  -6 1052.09   25.60
   4  -2   6 1428.16   33.50
  -4  -2  -6 1434.16   33.60
  -4   2  -6 1410.26   33.50
   4   2   6 1427.16   34.30
   4   2   6 1430.06   33.60
  -4   2  -6 1446.96   34.20
  -5  -2  -6  347.87   10.20
   5  -2   6  351.16   10.10
   5   2   6  361.06   10.60
  -5   2  -6  360.76   10.20
  -5   2  -6  339.67   10.50
  -6  -2  -6  930.81   23.10
   6  -2   6  925.51   22.90
   6   2   6  894.31   23.70
  -6   2  -6  961.00   23.10
  -6   2  -6  910.51   23.00
   6   2   6  951.00   23.10
  -7  -2  -6  451.45   12.70
   7  -2   6  428.96   12.50
  -7  -2  -6  437.36   13.00
  -7   2  -6  432.46   12.40
  -7   2  -6  445.96   12.60
   7   2   6  442.06   13.90
   7   2   6  445.26   12.60
   8  -2   6    6.80    2.80
  -8  -2  -6   -3.30    3.10
  -8  -2  -6    0.20    1.70
  -8   2  -6    1.00    1.80
  -8   2  -6   -1.00    2.00
   8   2   6    3.60    2.00
  -9  -2  -6  416.46   12.20
   9  -2   6  385.56   14.70
  -9  -2  -6  495.75   15.50
   9   2   6  404.66   15.50
  -9   2  -6  422.66   12.20
  -9   2  -6  430.96   15.20
 -10  -2  -6  372.46   10.90
  10   2   6  370.26   10.80
 -10   2  -6  376.16   10.90
 -11  -2  -6    0.60    1.40
 -11   2  -6   -0.70    1.30
  11   2   6   -0.60    1.80
  12  -2   6   12.70    3.10
 -12  -2  -6   11.50    1.50
 -12   2  -6    9.90    1.40
  12   2   6    6.30    2.10
 -13  -3   6   22.50    2.10
 -13  -3   6   25.60    2.40
 -13   3   6   22.00    2.20
 -13   3   6   23.30    2.20
 -12  -3   6  472.05   13.20
 -12  -3   6  483.85   12.60
 -12   3   6  465.75   12.20
 -12   3   6  463.35   12.90
  12   3  -6  474.45   12.70
 -11  -3   6   68.69    5.20
 -11  -3   6   68.39    4.30
 -11   3   6   63.09    4.40
 -11   3   6   63.59    4.60
 -10  -3   6   59.69    4.40
 -10  -3   6   57.69    5.10
 -10   3   6   56.59    4.80
 -10   3   6   52.19    4.60
  -9  -3   6   18.80    3.10
  -9  -3   6   11.80    2.30
  -9   3   6   22.50    4.10
  -9   3   6   20.00    3.00
  -8  -3   6  537.25   14.80
  -8  -3   6  547.45   16.00
  -8  -3   6  537.75   14.90
  -8   3   6  536.35   14.80
  -7  -3   6  383.76   12.40
  -7  -3   6  387.56   11.20
  -7  -3   6  376.16   11.30
  -7   3   6  385.96   11.80
  -7   3   6  380.86   11.60
  -6  -3   6  735.03   20.50
  -6  -3   6  801.02   19.30
  -6  -3   6  765.32   19.70
   6  -3  -6  725.73   39.10
   6   3  -6  754.32   20.80
   5  -3  -6  191.88    6.80
  -5  -3   6  188.08    6.60
   5  -3  -6  190.18   17.80
   5   3  -6  184.98    7.40
  -5   3   6  183.18    7.90
   5   3  -6  190.98    7.10
  -4  -3   6 2075.69   48.30
   4  -3  -6 2119.29   49.30
   4  -3  -6 2084.49   67.29
   4   3  -6 2143.79   49.80
  -4   3   6 2042.50   48.60
   4   3  -6 2144.69   49.10
   3  -3  -6 1293.77   46.10
   3  -3  -6 1269.17   29.50
   3  -3  -6 1328.57   29.50
   3   3  -6 1295.97   32.00
   3   3  -6 1317.57   31.30
  -3   3   6 1367.76   31.90
   2  -3  -6  391.46   21.50
   2  -3  -6  357.36    8.80
  -2  -3   6  354.06   10.00
  -2   3   6  349.96   23.90
   2   3  -6  368.26   10.80
   1  -3  -6 2885.31   93.49
  -1   3   6 3426.26   95.19
   1   3  -6 3438.66   74.69
   0  -3  -6    4.40    1.30
   0   3   6    3.50    2.00
   0   3  -6    5.80    1.10
   0   3   6    3.20    5.90
   1  -3   6   22.30    4.20
   1  -3   6   27.40    3.70
  -1  -3  -6   18.30    2.70
   1   3   6   26.30    3.90
  -1   3  -6   20.40    2.30
  -2  -3  -6  978.20   44.50
   2  -3   6  921.31   38.30
   2  -3   6  907.51   22.70
  -2   3  -6  980.60   23.60
   2   3   6  925.21   22.70
  -3  -3  -6  936.21   22.40
   3  -3   6  902.21   22.30
  -3   3  -6  889.01   22.40
   3   3   6  933.51   22.70
  -3   3  -6  928.21   23.10
   3   3   6  940.21   22.40
  -4  -3  -6 1261.07   29.70
   4  -3   6 1207.28   29.40
   4   3   6 1249.47   29.60
  -4   3  -6 1264.17   29.60
  -4   3  -6 1255.57   30.30
   4   3   6 1218.78   30.30
  -5  -3  -6  172.48    6.20
   5  -3   6  165.58    6.40
   5   3   6  171.28    6.30
   5   3   6  168.38    7.80
  -5   3  -6  168.48    6.70
  -5   3  -6  158.08    6.60
  -6  -3  -6  169.28    6.40
   6  -3   6  165.58    6.70
   6   3   6  168.08    6.50
  -6   3  -6  164.98    6.30
   6   3   6  170.08    7.70
   7  -3   6   71.29    5.40
  -7  -3  -6   72.59    4.40
   7   3   6   68.49    4.50
  -7   3  -6   67.89    4.30
   7   3   6   70.09    6.30
  -8  -3  -6  120.19    5.70
   8   3   6  110.69    7.50
  -8   3  -6  121.79    5.70
   8   3   6  125.19    5.90
  -9  -3  -6  666.63   17.70
  -9   3  -6  677.03   17.70
   9   3   6  658.63   17.50
 -10  -3  -6  223.58    7.30
 -10   3  -6  217.98    7.20
  10   3   6  211.48    7.10
 -11  -3  -6   32.80    2.60
  11  -3   6   26.10    2.60
 -11   3  -6   31.20    2.50
  11   3   6   24.20    3.00
 -12  -3  -6  249.97    7.10
 -12   3  -6  247.88    7.20
  12   3   6  246.48    7.20
 -13  -4   6   13.50    1.90
 -13  -4   6   17.00    2.10
 -13   4   6   12.90    1.60
 -13   4   6   15.30    1.80
 -12  -4   6  126.49    4.60
 -12  -4   6  128.59    5.20
  12   4  -6  129.89    5.10
 -12   4   6  118.99    4.80
 -12   4   6  126.29    4.50
 -11  -4   6  134.89    5.70
 -11  -4   6  136.69    6.40
 -11   4   6  131.89    5.90
 -10  -4   6  959.40   23.50
 -10  -4   6  954.40   24.70
 -10   4   6  908.91   23.00
 -10   4   6  929.11   24.00
  -9  -4   6  156.08    7.60
  -9  -4   6  152.88    6.30
  -9  -4   6  158.08    6.80
  -9   4   6  141.09    6.80
  -9   4   6  161.58    6.90
  -8  -4   6    3.70    2.70
  -8  -4   6    4.70    2.60
  -8  -4   6    3.20    2.20
  -8   4   6   10.70    3.70
  -8   4   6    6.10    2.30
  -7  -4   6  473.95   14.60
  -7  -4   6  489.75   13.70
  -7   4   6  478.85   13.30
  -7   4   6  490.55   13.90
  -6  -4   6  101.79    5.80
  -6  -4   6  101.09    5.10
  -6   4   6   95.69    5.90
  -6   4   6   96.79    6.00
  -5  -4   6    1.40    1.90
  -5  -4   6    4.20    3.30
   5  -4  -6   -0.10    7.20
   5   4  -6    2.80    2.40
  -5   4   6   -2.90    2.70
  -4  -4   6 1035.60   24.80
   4  -4  -6 1041.10   44.70
   4   4  -6 1020.10   26.60
  -4   4   6 1025.60   25.10
   4   4  -6 1035.30   25.70
   4   4  -6  986.00   24.80
  -3  -4   6   28.20    3.30
   3  -4  -6   29.30    8.90
  -3   4   6   25.80    3.70
   3   4  -6   24.30    3.30
   2  -4  -6 2839.82   84.39
  -2  -4   6 2571.64   60.69
  -2   4   6 2696.93   61.29
   2   4  -6 2596.04   62.39
  -1  -4   6  689.53   17.20
   1  -4  -6  649.83   36.00
  -1  -4   6  718.83   17.60
  -1   4   6  728.23   18.00
   1   4  -6  716.63   18.70
   0  -4   6   28.90    3.50
   0  -4  -6   32.10    2.80
   0  -4   6   28.20    3.10
   0   4  -6   30.00    2.90
   0   4   6   32.90    3.60
   1  -4   6  963.80   23.20
  -1  -4  -6  939.01   23.50
   1  -4   6 1017.40   30.50
   1  -4   6 1000.50   23.80
  -1   4  -6 1003.60   24.90
   1   4   6  975.70   24.10
   2  -4   6    3.40    4.10
  -2  -4  -6    3.90    7.00
   2  -4   6    4.10    2.10
   2  -4   6    5.80    1.60
   2   4   6    9.40    2.60
   2   4   6    5.00    2.10
  -2   4  -6    3.90    1.50
   3  -4   6  362.26    9.80
   3  -4   6  366.46   22.20
  -3  -4  -6  387.36   30.50
   3  -4   6  360.96   10.50
  -3  -4  -6  362.86   10.60
  -3   4  -6  354.36   10.60
  -3   4  -6  364.16   11.10
   3   4   6  366.66   10.40
   3   4   6  377.56   11.10
   3   4   6  363.36   10.50
   4  -4   6   31.60    2.80
  -4  -4  -6   28.70    3.30
   4  -4   6   30.70    3.30
   4  -4   6   29.00   15.80
   4   4   6   35.50    4.40
  -4   4  -6   33.00    3.80
   4   4   6   31.90    4.50
  -4   4  -6   32.40    3.80
   4   4   6   32.90    5.00
   5  -4   6  265.67    9.00
  -5  -4  -6  263.87    8.50
  -5   4  -6  267.87    8.50
   5   4   6  270.67    8.50
   5   4   6  263.77    9.30
  -6  -4  -6   65.69    4.20
   6  -4   6   58.59    8.80
  -6   4  -6   74.29    4.50
   6   4   6   69.49    4.40
   6   4   6   65.89    5.60
  -7  -4  -6 1843.72   43.70
   7   4   6 1853.01   43.80
  -7   4  -6 1822.32   43.60
   7   4   6 1861.21   43.70
  -8  -4  -6  128.69    6.10
   8   4   6  141.99    6.20
  -8   4  -6  131.49    5.90
   8   4   6  129.79    6.90
  -9  -4  -6   37.80    3.20
   9   4   6   42.80    6.10
   9   4   6   44.10    3.20
  -9   4  -6   41.10    3.10
 -10  -4  -6   29.30    2.80
  10  -4   6   34.40    2.60
  10   4   6   36.20    2.80
 -10   4  -6   32.20    2.70
  11  -4   6   -0.10    1.40
 -11  -4  -6    4.70    1.50
  11   4   6    2.40    1.60
 -11   4  -6    2.60    1.30
 -13  -5   6   -1.30    1.20
 -13  -5   6    0.80    1.10
 -13   5   6   -0.10    0.90
 -12  -5   6    2.60    1.40
 -12  -5   6    4.70    1.30
 -12   5   6    1.90    1.10
 -11  -5   6  157.98    6.50
 -11  -5   6  159.48    5.50
 -11   5   6  161.08    5.90
 -10  -5   6  100.79    5.00
 -10  -5   6  100.59    6.00
 -10   5   6   98.99    5.30
  10   5  -6   96.19    6.30
  -9  -5   6    4.30    2.30
  -9  -5   6    3.40    2.20
  -9  -5   6    7.30    2.90
  -9   5   6    0.70    2.00
  -8  -5   6    6.20    2.30
  -8  -5   6    5.80    2.70
  -8  -5   6    5.60    2.30
  -8   5   6    1.70    2.90
  -8   5   6    3.50    2.10
  -7  -5   6   12.40    2.50
  -7  -5   6   15.60    3.00
  -7   5   6   18.60    2.80
  -7   5   6   20.80    3.10
  -6  -5   6 1038.20   24.80
  -6  -5   6 1002.90   24.60
  -6   5   6  823.32   28.00
  -6   5   6 1024.00   24.00
  -6   5   6 1014.10   24.80
  -5  -5   6   31.60    4.30
  -5  -5   6   23.70    3.40
  -5  -5   6   27.40    3.50
  -5   5   6   26.20    3.60
  -5   5   6   29.00    4.70
  -5   5   6   28.10    4.10
  -4  -5   6  132.89    5.50
  -4  -5   6  140.29    7.20
  -4   5   6  116.79    5.90
   4   5  -6  134.59    6.10
  -4   5   6  135.19    6.10
   3  -5  -6   17.00    7.30
  -3  -5   6   17.60    3.00
   3   5  -6   18.30    4.10
   3   5  -6   14.00    2.20
   3   5  -6   21.10    3.50
   2  -5  -6 4466.85  128.99
  -2  -5   6 4261.27   96.49
  -2   5   6 4265.17   97.09
   2   5  -6 4287.67   98.89
   2   5  -6 4362.16   97.79
   2   5  -6 4107.19   96.59
  -1  -5   6  222.68    6.80
  -1   5   6  214.58    7.50
   1   5  -6  204.48    6.90
   1   5  -6  210.98    8.10
   0  -5   6   43.10    3.10
   0  -5   6   41.70    3.80
   0   5   6   42.30    4.00
   0   5  -6   45.10    3.30
   0   5  -6   43.70    4.10
   1  -5   6  677.73   17.40
   1  -5   6  692.53   16.80
   1   5   6  651.93   17.30
   1   5   6  697.33   17.90
  -1   5  -6  684.03   18.70
  -1   5  -6  688.43   17.30
   2  -5   6  296.77    9.30
   2  -5   6  310.97    8.50
   2   5   6  299.47    9.40
   2   5   6  280.17    9.80
  -2   5  -6  307.67    9.10
   2   5   6  292.77    9.00
  -2   5  -6  289.27    9.90
  -3  -5  -6  299.27    9.90
   3  -5   6  324.17    9.00
   3  -5   6  309.07    9.80
   3   5   6  323.37   10.20
   3   5   6  315.57    9.50
   3   5   6  317.97   10.20
  -3   5  -6  310.27   11.10
   4  -5   6  392.46   10.50
   4  -5   6  371.16   14.10
  -4  -5  -6  391.56   11.20
   4   5   6  380.26   11.70
   4   5   6  391.86   11.20
  -4   5  -6  387.66   11.20
  -5  -5  -6  737.03   19.00
   5  -5   6  738.23   18.30
   5   5   6  764.42   19.00
  -5   5  -6  700.23   18.80
  -5   5  -6  743.93   18.90
   5   5   6  729.13   19.40
  -6  -5  -6 1974.00   46.30
   6  -5   6 1993.10   45.50
   6   5   6 1932.41   46.40
  -6   5  -6 1965.60   46.00
   6   5   6 1969.80   46.20
  -6   5  -6 1952.30   46.10
  -7  -5  -6  773.42   19.80
   7  -5   6  755.52   18.90
   7   5   6  747.83   19.70
   7   5   6  763.02   20.00
  -7   5  -6  725.03   19.40
   8  -5   6  196.78    6.40
  -8  -5  -6  192.38    6.90
   8   5   6  198.08    7.70
  -8   5  -6  196.38    6.90
   8   5   6  199.88    7.00
  -9  -5  -6   87.29    4.20
   9  -5   6   91.39    3.80
  -9   5  -6   88.09    4.10
   9   5   6   86.59    5.20
   9   5   6   90.39    4.20
  10  -5   6    0.20    1.30
 -10  -5  -6   -0.90    1.50
 -10   5  -6   -1.70    1.30
  10   5   6    1.90    1.40
 -11  -5  -6    4.30    1.60
  11  -5   6    6.10    1.50
  11   5   6    3.40    1.50
 -11   5  -6    5.80    1.40
 -12  -6   6   23.00    2.40
 -12  -6   6   28.60    2.30
  12   6  -6   22.90    2.70
 -12   6   6   28.60    2.10
 -11  -6   6   27.70    2.80
 -11  -6   6   23.90    2.50
 -11   6   6   26.90    2.40
 -10  -6   6   24.30    4.40
  10   6  -6   25.80    3.30
 -10   6   6   23.80    3.50
  -9  -6   6   32.10    4.00
  -9  -6   6   39.40    4.80
  -9  -6   6   35.80    3.30
  -9   6   6   32.90    3.80
  -8  -6   6  109.69    5.70
  -8  -6   6  108.59    6.40
  -8  -6   6  112.39    6.00
  -8   6   6  106.09    5.70
  -8   6   6  103.39    5.70
  -7  -6   6 1546.05   37.10
  -7  -6   6 1542.95   37.50
  -7   6   6 1550.34   37.40
  -7   6   6 1567.84   36.50
  -6  -6   6  249.78    9.10
  -6  -6   6  259.77    8.90
  -6   6   6  258.57    8.40
  -6   6   6  265.27    9.10
  -6   6   6  267.67    9.50
  -5  -6   6  143.59    5.80
  -5  -6   6  160.28    6.40
  -5  -6   6  152.08    7.10
  -5   6   6  164.88    6.10
  -5   6   6  153.08    6.80
   5   6  -6  150.08    7.30
  -5   6   6  142.39    6.90
  -4  -6   6 1005.50   23.60
  -4  -6   6 1002.00   24.70
  -4  -6   6  975.00   25.00
  -4   6   6  996.60   24.90
  -4   6   6  989.30   25.10
  -4   6   6  992.00   24.20
   4   6  -6 1009.80   24.60
  -3  -6   6  464.05   13.80
  -3  -6   6  474.25   12.20
  -3  -6   6  487.25   13.00
  -3   6   6  469.35   12.70
  -3   6   6  446.76   13.60
  -3   6   6  482.25   13.60
  -2  -6   6  233.28    7.00
  -2   6   6  228.18    8.10
  -2   6   6  219.88    7.50
  -1  -6   6  870.41   21.00
  -1  -6   6  872.21   20.30
  -1   6   6  794.92   23.10
  -1   6   6  826.62   20.70
   0  -6   6 1929.51   45.20
   0  -6   6 1946.01   44.30
   0   6  -6 2013.30   45.50
   0   6   6 1897.61   44.80
   0   6   6 1833.12   45.40
   0   6   6 2010.80   46.10
   1  -6   6  191.08    6.30
   1  -6   6  182.48    6.50
   1   6   6  191.48    7.50
   1   6   6  206.38    7.50
  -1   6  -6  194.98    6.80
   1   6   6  184.38    7.80
   2  -6   6   21.90    2.70
   2   6   6   20.20    3.90
  -2   6  -6   16.10    2.40
   2   6   6   17.00    2.90
   2   6   6   16.30    2.50
   2   6   6   19.90    3.30
  -3  -6  -6  656.83   18.30
   3  -6   6  700.63   17.20
   3   6   6  686.13   18.40
   3   6   6  691.23   17.60
  -3   6  -6  667.73   17.70
   3   6   6  685.03   18.10
  -4  -6  -6  135.09    5.90
   4  -6   6  133.99    5.20
  -4   6  -6  134.79    5.90
  -4   6  -6  125.09    6.30
   4   6   6  136.09    6.80
   4   6   6  130.09    5.90
   4   6   6  135.29    6.50
  -5  -6  -6  292.87    9.50
   5  -6   6  291.87    8.80
  -5   6  -6  281.97    9.40
   5   6   6  301.87    9.90
  -5   6  -6  301.77    9.50
   5   6   6  291.77    9.40
   6  -6   6  404.36   11.00
  -6  -6  -6  371.16   11.50
  -6   6  -6  389.56   11.70
   6   6   6  394.56   12.00
   6   6   6  380.66   11.50
  -6   6  -6  384.66   11.40
  -7  -6  -6  909.91   26.50
   7   6   6  880.41   22.90
  -8  -6  -6   10.00    1.70
   8  -6   6    8.40    1.50
  -8   6  -6    7.40    1.70
   8   6   6    9.30    1.70
   8   6   6   12.20    2.60
   9  -6   6  238.38    7.00
  -9  -6  -6  237.18    7.50
   9   6   6  238.08    7.50
   9   6   6  239.58    7.50
  -9   6  -6  229.28    7.30
 -10  -6  -6   20.90    2.80
  10   6   6   23.80    2.40
  11  -6   6  140.59    4.70
  11   6   6  154.38    4.90
 -11  -7   6  160.38    5.70
 -11  -7   6  155.08    5.10
 -11   7   6  167.38    5.40
  11   7  -6  170.18    5.70
 -10  -7   6   64.19    3.80
 -10  -7   6   55.09    3.30
  10   7  -6   55.89    3.40
 -10   7   6   58.09    3.30
  -9  -7   6    4.40    1.60
  -9  -7   6    4.90    2.50
   9   7  -6    4.20    2.20
  -9   7   6    8.40    2.10
  -8  -7   6   94.79    5.30
  -8  -7   6   92.89    6.00
  -8  -7   6   94.99    4.70
  -8   7   6   92.09    5.00
  -8   7   6   95.79    5.30
  -7  -7   6    7.40    2.80
  -7  -7   6    9.50    2.60
  -7   7   6    7.70    2.30
  -7   7   6   11.20    2.30
  -6  -7   6  687.53   18.40
  -6  -7   6  678.63   18.20
  -6   7   6  690.13   17.60
  -6   7   6  690.73   18.80
  -6   7   6  678.23   18.20
  -5  -7   6   91.09    5.20
  -5   7   6   92.59    4.80
  -5   7   6   91.09    6.00
   5   7  -6   85.49    6.40
  -5   7   6   93.49    5.50
  -4  -7   6  440.46   11.40
  -4  -7   6  435.16   12.50
  -4  -7   6  415.16   12.90
   4   7  -6  436.16   12.50
  -4   7   6  448.46   13.10
  -4   7   6  435.16   12.10
  -4   7   6  405.46   12.50
  -3  -7   6  734.63   19.40
  -3  -7   6  749.92   19.00
  -3  -7   6  754.82   18.00
  -3   7   6  704.03   19.30
   3   7  -6  727.53   19.00
  -3   7   6  724.53   19.70
  -3   7   6  762.02   18.60
  -2  -7   6  280.17    8.80
  -2  -7   6  288.57    8.00
  -2  -7   6  269.47    9.60
  -2   7   6  264.57    8.40
  -2   7   6  272.57    9.40
  -2   7   6  270.17    9.50
   2   7  -6  277.57    8.90
  -1  -7   6  156.38    6.00
  -1  -7   6  152.58    5.40
  -1   7   6  151.18    8.00
  -1   7   6  147.19    6.70
  -1   7   6  153.58    6.00
   1   7  -6  154.98    6.20
   0  -7   6  286.07    8.60
   0  -7   6  280.57    8.10
   0   7   6  282.27    9.80
   0   7   6  281.77    9.60
   0   7  -6  279.77    8.90
   0   7   6  275.97    8.80
   1  -7   6  578.14   14.90
   1   7   6  570.84   15.70
   1   7   6  560.04   15.00
  -1   7  -6  562.44   15.40
   1   7   6  574.94   16.00
   2  -7   6  325.17    9.50
   2   7   6  321.77   10.30
  -2   7  -6  326.67   10.10
   2   7   6  316.77   10.50
   2   7   6  336.17   10.60
  -3  -7  -6  333.57   10.90
   3  -7   6  318.27    9.50
   3   7   6  322.17   10.20
   3   7   6  323.97   10.80
  -3   7  -6  334.37   10.30
  -4  -7  -6   37.00    3.90
   4  -7   6   36.30    3.30
  -4   7  -6   38.30    3.90
   4   7   6   42.70    4.50
   4   7   6   44.60    5.50
   4   7   6   37.50    4.40
  -5  -7  -6  240.28    8.50
   5  -7   6  253.97    8.00
   5   7   6  248.98    8.50
   5   7   6  240.88    8.80
  -5   7  -6  253.17    8.70
  -6  -7  -6  118.89    8.20
   6   7   6  137.99    6.40
  -6   7  -6  140.29    7.60
   7  -7   6  577.04   14.70
  -7  -7  -6  552.54   15.10
   7   7   6  561.84   15.10
   7   7   6  574.64   15.70
  -8  -7  -6  317.57    9.30
   8  -7   6  316.47    8.80
   8   7   6  303.47    9.20
   8   7   6  311.67    9.20
  -9  -7  -6   16.90    2.70
   9  -7   6   19.00    2.20
   9   7   6   22.00    2.80
   9   7   6   14.70    2.40
  10  -7   6    2.30    1.40
 -10  -7  -6    4.20    1.90
  10   7   6    7.80    2.00
  10   7   6    2.60    1.40
 -11  -8   6  159.98    5.40
 -11   8   6  185.78    5.40
  11   8  -6  159.28    5.40
 -10  -8   6   11.40    2.70
  10   8  -6   14.50    2.40
  -9  -8   6   86.59    4.50
  -9  -8   6   87.09    4.30
  -9  -8   6   83.99    4.20
   9   8  -6   81.19    3.80
  -9   8   6   86.79    3.70
  -9   8   6   98.19    4.20
  -8  -8   6   22.60    2.40
  -8  -8   6   17.80    2.90
  -8  -8   6   22.80    4.10
  -7  -8   6  816.12   20.70
  -7  -8   6  841.82   21.30
  -7   8   6  820.82   20.30
  -7   8   6  800.82   21.00
  -6  -8   6  122.59    6.90
  -6  -8   6  140.29    6.50
  -6   8   6  132.49    5.70
  -6   8   6  134.19    9.10
  -6   8   6  138.79    6.50
  -5  -8   6  193.68    7.60
  -5  -8   6  186.58    8.20
   5   8  -6  193.98    8.40
  -5   8   6  183.38    8.10
  -5   8   6  201.28    7.90
  -5   8   6  182.58    6.80
  -4  -8   6   49.90    6.10
  -4  -8   6   50.39    4.40
  -4   8   6   54.99    5.10
  -4   8   6   49.99    3.90
  -4   8   6   51.69    5.20
   4   8  -6   56.59    5.00
  -3  -8   6  340.07   11.50
  -3  -8   6  339.17   10.60
   3   8  -6  344.27   10.80
  -3   8   6  355.66   11.00
  -3   8   6  352.26   10.20
  -3   8   6  343.37   11.40
  -2  -8   6  188.58    9.30
  -2  -8   6  204.78    7.40
  -2   8   6  214.38   11.30
  -2   8   6  200.28    7.10
   2   8  -6  209.08    7.60
  -2   8   6  215.58    8.40
  -1  -8   6  191.28    7.00
  -1   8   6  191.48    8.90
  -1   8   6  196.98    8.20
  -1   8   6  183.48    6.70
   1   8  -6  186.38    7.30
  -1   8   6  190.48    8.00
   0  -8   6  130.49    5.60
   0   8   6  139.49    6.70
   0   8   6  132.29    5.80
   0   8  -6  141.39    6.10
   0   8   6  125.29   10.60
   1  -8   6  189.38    6.80
   1   8   6  196.48    7.90
   1   8   6  187.98    7.80
   1   8   6  193.08    7.00
  -1   8  -6  186.98    7.30
   2  -8   6  252.77    8.20
   2   8   6  261.57    9.10
   2   8   6  250.17    8.60
   2   8   6  253.77    9.30
  -2   8  -6  258.77    8.90
   3  -8   6  565.94   15.20
  -3  -8  -6  591.84   16.30
   3   8   6  573.94   16.00
  -3   8  -6  574.64   15.90
   3   8   6  567.74   16.40
   4  -8   6  142.09    5.80
  -4  -8  -6  141.99    6.30
   4   8   6  150.88    6.80
  -4   8  -6  159.28    6.60
   4   8   6  149.09    6.60
   4   8   6  143.59    7.70
  -5  -8  -6   74.99    4.10
   5  -8   6   84.59    3.90
  -5   8  -6   89.59    4.40
   5   8   6   91.59    5.40
   5   8   6   83.19    4.40
  -6  -8  -6   57.49    3.50
   6  -8   6   57.99    3.20
   6   8   6   62.39    4.80
  -6   8  -6   62.19    4.20
   6   8   6   56.49    3.60
  -7  -8  -6  219.48    7.00
   7  -8   6  226.08    6.70
   7   8   6  218.78    7.00
   7   8   6  200.08    8.40
  -8  -8  -6   15.20    2.80
   8  -8   6   16.30    2.10
   8   8   6   15.90    2.60
   8   8   6   14.60    2.40
  -9  -8  -6   76.69    3.90
   9  -8   6   78.99    3.20
   9   8   6   82.69    3.50
   9   8   6   77.59    3.50
 -10  -9   6   74.39    3.30
  10   9  -6   71.49    3.30
 -10   9   6   74.59    3.20
  10   9  -6   79.79    3.40
  -9  -9   6   59.79    3.40
  -9  -9   6   59.39    3.40
   9   9  -6   61.09    3.10
  -8  -9   6  489.95   13.70
  -8  -9   6  480.65   13.20
   8   9  -6  483.35   13.00
  -8   9   6  476.05   12.20
  -8   9   6  517.35   13.30
  -7  -9   6  120.09    5.10
  -7   9   6  124.89    4.60
  -6  -9   6  115.89    5.10
  -6   9   6  117.19    5.10
  -6   9   6  131.29    6.50
  -6   9   6  115.19    5.70
  -5  -9   6  455.45   13.20
  -5   9   6  455.35   13.30
  -5   9   6  465.05   13.50
  -5   9   6  488.25   12.80
   5   9  -6  461.35   13.20
   4   9  -6  252.37   10.10
  -4   9   6  268.97    9.30
  -4   9   6  273.67    8.50
  -3  -9   6   67.29    4.70
   3   9  -6   67.69    5.10
  -3   9   6   67.79    5.20
  -3   9   6   66.99    5.40
  -3   9   6   70.79    4.30
  -2  -9   6   36.70    3.90
   2   9  -6   44.40    4.40
  -2   9   6   40.50    3.70
  -2   9   6   46.60    4.90
  -2   9   6   48.40    5.00
  -1  -9   6  266.97    8.90
  -1   9   6  261.67    9.80
  -1   9   6  262.97    8.40
   1   9  -6  268.87    9.20
  -1   9   6  255.77    9.80
   0  -9   6  267.47    8.80
   0  -9   6  243.78    9.90
   0   9   6  259.97    9.70
   0   9   6  262.27    8.40
   0   9  -6  262.67    9.10
   0   9   6  267.37    9.40
   1  -9   6   71.69    4.50
   1   9   6   68.89    5.30
   1   9   6   62.59    5.40
   1   9   6   72.59    4.60
  -1   9  -6   72.99    4.90
   2  -9   6   43.60    3.80
   2   9   6   33.40    4.50
   2   9   6   32.90    4.50
   2   9   6   46.20    5.10
  -2   9  -6   37.30    4.30
   3  -9   6    7.90    1.50
  -3  -9  -6    7.30    1.90
   3   9   6    7.30    2.40
  -3   9  -6    8.90    1.70
   3   9   6    9.40    2.40
  -4  -9  -6  291.97    9.00
   4  -9   6  289.57    8.70
   4   9   6  302.57    9.80
  -4   9  -6  292.27    9.10
   5  -9   6   19.60    2.30
  -5  -9  -6   13.50    2.60
  -5   9  -6   15.20    2.10
   5   9   6   16.20    2.60
   5   9   6   14.10    2.50
  -6  -9  -6   -0.90    1.50
   6  -9   6    0.90    1.20
  -6   9  -6    6.20    2.40
   6   9   6    2.30    2.10
   6   9   6    1.80    1.50
   7  -9   6  422.06   11.00
  -7  -9  -6  405.16   11.20
   7   9   6  418.96   11.30
   7   9   6  410.76   11.80
   8  -9   6   90.19    3.60
  -8  -9  -6   85.39    4.20
   8   9   6   90.79    3.60
  -9 -10   6   81.09    3.40
  -9  10   6   77.29    3.10
   9  10  -6   87.19    3.20
   9  10  -6   77.89    3.70
  -8 -10   6    7.50    1.40
  -8 -10   6    5.10    1.50
  -8  10   6    6.70    1.30
   8  10  -6    8.80    1.30
  -7 -10   6  124.79    5.00
  -7 -10   6  123.29    4.90
  -7  10   6  125.69    4.10
   7  10  -6  130.19    4.60
  -7  10   6  108.69    4.60
  -6 -10   6   94.09    4.30
  -6  10   6   89.99    3.60
  -6  10   6   82.69    4.10
   6  10  -6  100.39    4.10
  -6  10   6   98.89    5.20
  -5 -10   6   69.89    3.90
  -5  10   6   60.69    3.80
  -5  10   6   70.29    4.40
  -5  10   6   65.19    4.30
  -4 -10   6    3.60    1.50
   4  10  -6    2.90    2.30
  -4  10   6    2.70    2.00
  -4  10   6    2.00    1.80
  -4  10   6   -1.00    2.10
  -3 -10   6   63.59    3.90
   3  10  -6   78.39    4.30
  -3  10   6   76.19    4.20
  -3  10   6   68.29    4.40
  -2 -10   6   45.30    3.30
   2  10  -6   43.10    3.60
  -2  10   6   44.30    3.50
  -2  10   6   38.90    3.90
  -1 -10   6   81.69    4.10
   1  10  -6   82.59    4.30
  -1  10   6   74.59    4.50
  -1  10   6   76.29    4.20
   0 -10   6   -1.20    1.50
   0  10   6    0.10    1.80
   0  10  -6   -0.60    1.60
   0  10   6    2.90    2.80
   0  10   6    0.00    1.90
   1 -10   6   67.69    3.70
   1  10   6   69.39    4.30
   1  10   6   68.59    4.40
  -1  10  -6   73.69    4.10
   1  10   6   84.09    5.30
   2 -10   6   41.60    3.00
  -2  10  -6   43.10    3.30
   2  10   6   39.30    4.50
   2  10   6   39.90    3.70
   2  10   6   46.10    4.40
   3 -10   6  665.83   17.20
  -3 -10  -6  680.53   17.40
   3  10   6  696.13   17.90
  -3  10  -6  676.83   17.70
   3  10   6  652.13   17.80
   4 -10   6  245.58    7.40
  -4 -10  -6  243.88    7.60
   4  10   6  251.27    7.90
  -4  10  -6  242.58    7.80
   5 -10   6    7.60    1.40
  -5 -10  -6    4.10    1.60
   5  10   6    3.60    1.50
  -5  10  -6    4.10    2.00
   6 -10   6   37.80    2.50
  -6 -10  -6   35.10    3.30
   6  10   6   31.00    2.50
  -6  10  -6   32.70    3.10
   7 -10   6  372.46    9.80
   7  10   6  383.56   10.00
  -7 -11   6    1.10    1.50
  -7 -11   6    3.30    1.30
  -7  11   6    3.10    1.00
   7  11  -6   -0.10    1.00
  -6 -11   6   47.90    4.70
   6  11  -6   45.50    4.00
  -6  11   6   57.69    2.50
   6  11  -6   60.49    2.80
  -5 -11   6   47.90    3.20
  -5  11   6   55.09    2.50
  -5  11   6   51.69    4.10
   5  11  -6   51.99    2.80
  -4 -11   6    0.50    1.50
   4  11  -6   -1.40    2.90
   4  11  -6   -1.10    1.30
  -4  11   6   -1.00    1.10
  -4  11   6    2.50    1.90
  -3 -11   6  119.89    5.00
   3  11  -6  125.49    4.60
  -3  11   6  127.89    4.50
  -3  11   6  133.49    5.50
   3  11  -6  122.29    5.30
  -2 -11   6  169.88    6.00
   2  11  -6  171.08    6.10
  -2  11   6  168.18    5.50
   2  11  -6  172.38    5.60
  -2  11   6  166.78    6.50
  -1 -11   6    2.40    1.50
  -1  11   6   -1.20    1.70
   1  11  -6   -0.30    1.80
   1  11  -6    1.60    1.70
  -1  11   6    1.30    1.20
   0 -11   6   -1.40    1.40
   0  11  -6    1.40    1.70
   0  11   6    3.30    1.80
   0  11   6    2.60    1.30
   0  11   6   -0.40    2.30
  -1 -11  -6  137.69    5.50
   1 -11   6  128.59    4.90
   1  11   6  122.79    4.40
   1  11   6  121.09    4.90
   1  11   6  127.39    5.40
  -1  11  -6  124.49    5.10
   2 -11   6    2.20    1.40
   2  11   6   -0.90    1.60
   2  11   6    1.90    1.80
   2  11   6   -2.50    2.00
  -2  11  -6    1.40    1.50
  -3 -11  -6   24.40    2.70
   3 -11   6   28.40    2.50
  -3  11  -6   29.10    2.80
   3  11   6   29.60    2.50
   4 -11   6   20.60    2.20
  -4 -11  -6   18.90    2.80
   4  11   6   20.80    2.20
   5 -11   6   33.90    2.50
  -5 -11  -6   43.30    3.70
   5  11   6   43.60    2.50
  -5  11  -6   35.50    3.60
   6 -11   6   10.50    1.40
   6  11   6    8.00    1.20
  -5 -12   6   30.60    2.60
  -5  12   6   25.70    1.60
   5  12  -6   27.40    2.00
  -4 -12   6   44.30    2.90
  -4  12   6   44.90    3.50
   4  12  -6   43.20    2.40
  -4  12   6   46.80    2.10
  -3 -12   6  179.78    5.80
  -3  12   6  177.08    5.10
   3  12  -6  180.28    5.30
   3  12  -6  168.68    6.10
  -3  12   6  176.28    6.10
   2  12  -6   18.70    2.70
   2  12  -6   13.20    2.10
  -2  12   6   19.60    1.70
  -2  12   6   17.50    3.00
   1 -12  -6  104.19    4.60
  -1 -12   6   99.09    4.20
  -1  12   6   97.39    3.50
  -1  12   6  109.59    4.70
   0 -12  -6    4.70    1.70
   0 -12   6    8.40    1.50
   0  12   6    9.90    2.60
   0  12  -6    7.20    1.90
   0  12   6    7.00    1.20
   1 -12   6    3.40    2.10
  -1 -12  -6    1.20    1.50
  -1  12  -6   -2.60    2.20
   1  12   6   -2.90    1.80
   1  12   6    2.30    1.40
  -2 -12  -6   35.10    3.10
   2 -12   6   35.20    2.60
  -2  12  -6   35.00    2.80
   3 -12   6  215.28    6.40
  -3  12  -6  217.98    6.60
 -13   0   7  138.89    5.10
 -13   0   7  135.49    4.70
 -12   0   7    2.00    1.70
 -12   0   7    1.10    2.40
 -11   0   7  491.35   14.30
 -11   0   7  495.55   13.70
 -10   0   7    0.30    2.00
 -10   0   7    2.30    2.30
  -9   0   7 3559.04   82.39
  -9   0   7 3685.63   83.39
  -8   0   7   -2.60    2.40
  -8   0   7    0.20    2.40
  -7   0   7  232.38    8.20
   7   0  -7  234.08   13.00
  -7   0   7  226.08    9.00
   6   0  -7   -0.30    2.30
   6   0  -7   -1.30    2.20
   5   0  -7  338.47   21.20
   5   0  -7  327.87   10.20
   5   0  -7  340.67    9.80
   4   0  -7    1.30    1.30
   4   0  -7    2.40    2.60
   2   0  -7   -0.10    2.10
   2   0  -7    0.50    1.00
  -1   0   7 1777.02   48.20
   1   0  -7 1817.62   42.40
   1   0  -7 1887.01   43.50
   0   0   7   -0.10    3.00
   0   0  -7   -1.00    1.00
   0   0  -7   -0.20    1.90
   1   0   7    1.90    1.80
   1   0   7    2.30    4.00
  -1   0  -7    3.30    1.10
   2   0   7    2.30    1.80
   2   0   7    6.00    6.90
  -3   0  -7   29.70    3.30
  -3   0  -7   37.70    3.40
  -4   0  -7   -1.70    2.00
  -4   0  -7    0.80    1.50
   4   0   7   -0.90    1.60
  -5   0  -7  757.22   19.10
   5   0   7  743.33   18.90
   6   0   7    3.00    1.80
  -6   0  -7    0.40    1.50
  -7   0  -7  226.98    7.90
   8   0   7    2.40    2.20
  -8   0  -7   -0.20    1.70
  -9   0  -7  846.92   21.80
   9   0   7  862.91   21.50
 -10   0  -7    1.00    1.40
  10   0   7   -2.40    2.00
  11   0   7    9.70    2.40
 -11   0  -7   13.20    2.30
 -12   0  -7    1.30    1.30
 -13  -1   7   79.79    3.70
 -13  -1   7   79.59    3.40
 -13   1   7   79.69    3.30
 -13   1   7   84.69    3.60
 -12  -1   7    5.30    1.50
 -12  -1   7    5.70    1.50
 -12   1   7    7.20    1.60
 -12   1   7    7.20    1.60
 -11  -1   7    9.20    2.50
 -11  -1   7   10.10    2.30
 -11   1   7   14.30    2.40
 -11   1   7   13.90    2.60
 -10  -1   7  170.98    7.50
 -10  -1   7  167.78    6.70
 -10   1   7  169.18    7.30
 -10   1   7  170.68    6.70
  -9  -1   7  618.64   16.80
  -9  -1   7  636.24   17.70
  -9   1   7  637.84   16.80
  -9   1   7  627.54   17.40
  -8  -1   7   32.10    3.50
  -8  -1   7   29.60    4.80
  -8   1   7   32.00    4.30
  -8   1   7   33.00    4.60
  -7  -1   7  478.65   13.20
  -7  -1   7  449.46   13.80
  -7   1   7  469.95   13.10
  -7   1   7  455.25   13.60
   6  -1  -7 1284.57   30.10
  -6  -1   7 1244.28   29.40
  -6  -1   7 1200.38   30.20
   6   1  -7 1178.08   30.30
   6   1  -7 1252.27   30.90
   5  -1  -7  427.36   12.40
   5  -1  -7  433.36   11.70
  -5  -1   7  445.26   12.50
   5  -1  -7  458.35   23.20
   5   1  -7  428.96   12.20
   5   1  -7  433.96   12.90
   4  -1  -7  105.89    4.80
   4  -1  -7  108.29    4.10
   4  -1  -7  109.69    9.90
   4   1  -7  105.19    4.90
   4   1  -7  105.09    4.50
   3  -1  -7  955.80   31.90
  -3  -1   7  832.72   21.50
   3  -1  -7  887.71   22.60
   3   1  -7  881.61   22.50
   2  -1  -7 1516.05   36.50
   2  -1  -7 1485.25   35.20
   2   1  -7 1552.54   36.60
   1  -1  -7   14.00    2.40
   1  -1  -7   16.50    3.00
  -1   1   7   18.80    6.90
   1   1  -7   11.20    2.30
   0  -1  -7    1.80    1.70
   0  -1  -7    1.40    3.00
   0  -1   7    3.00    1.70
   0   1   7    2.20    3.80
   0   1  -7    1.20    1.00
   1  -1   7 1556.64   35.40
   1   1   7 1525.35   50.39
   1   1   7 1445.26   35.20
  -1   1  -7 1554.64   36.60
   2  -1   7  176.88   19.10
  -2  -1  -7  218.08    6.80
   2  -1   7  210.48    6.60
   2   1   7  209.58   19.50
  -2   1  -7  207.18    7.20
   2   1   7  195.78    6.60
   3  -1   7    9.40    1.80
  -3  -1  -7   10.50    1.90
  -3   1  -7   12.90    2.30
   3   1   7   12.80    1.90
  -3   1  -7    9.70    1.80
   4  -1   7  109.29    4.90
  -4  -1  -7  114.19    4.80
  -4   1  -7  104.89    5.60
   4   1   7  114.69    4.80
  -4   1  -7  112.29    4.90
  -5  -1  -7  704.63   20.70
  -5  -1  -7  762.42   18.80
   5  -1   7  753.42   18.70
   5   1   7  695.33   19.70
  -5   1  -7  754.42   18.90
   5   1   7  756.32   18.80
  -6  -1  -7  103.19    5.00
   6  -1   7  103.49    5.10
   6   1   7  105.69    5.00
  -6   1  -7  103.59    4.90
   6   1   7   94.69    7.70
   7  -1   7  196.48    7.30
  -7  -1  -7  190.48    7.10
  -7   1  -7  195.68    7.20
   7   1   7  197.08    7.20
   8  -1   7    4.50    2.30
  -8  -1  -7    3.20    1.70
   8   1   7    5.10    2.20
  -8   1  -7    3.10    1.90
   9  -1   7  182.48    6.50
  -9  -1  -7  181.58    6.60
  -9   1  -7  172.38    6.50
   9   1   7  177.08    6.50
 -10  -1  -7   67.19    3.70
  10  -1   7   61.49    4.30
  10   1   7   74.99    4.00
 -10   1  -7   76.59    3.80
 -11  -1  -7    1.30    1.30
 -11   1  -7    2.90    1.30
  11   1   7   -0.40    2.00
 -12  -1  -7    7.20    1.40
 -12   1  -7    8.20    1.40
 -13  -2   7   61.39    3.10
 -13  -2   7   62.39    2.90
 -13   2   7   58.39    2.80
 -13   2   7   61.69    3.00
 -12  -2   7    5.20    1.40
 -12  -2   7    2.30    1.50
 -12   2   7    2.30    1.40
 -12   2   7    5.90    1.60
 -11  -2   7  148.29    6.10
 -11  -2   7  156.68    7.10
 -11   2   7  160.58    6.80
 -11   2   7  159.68    6.20
 -10  -2   7   13.00    2.60
 -10  -2   7   14.00    2.80
 -10   2   7   19.20    2.80
 -10   2   7   18.50    3.00
  -9  -2   7  971.50   25.00
  -9  -2   7  936.11   23.90
  -9   2   7  934.21   24.40
  -9   2   7  972.10   23.70
  -8  -2   7  464.35   14.10
  -8  -2   7  459.95   13.20
  -8   2   7  471.65   13.60
  -8   2   7  455.25   13.00
  -7  -2   7 3635.54   83.09
  -7  -2   7 3710.33   82.09
  -7  -2   7 3558.34   82.19
  -7   2   7 3618.54   81.49
  -7   2   7 3614.94   82.59
  -7   2   7 3517.85   81.89
  -6  -2   7    1.80    2.20
  -6  -2   7    1.60    2.80
   6  -2  -7    2.00    8.70
   6   2  -7    2.60    2.80
   5  -2  -7    0.20    1.90
  -5  -2   7   -0.10    2.20
   5  -2  -7    1.80    5.70
   5   2  -7    1.70    2.00
   5   2  -7    3.30    1.90
   4  -2  -7 1505.35   34.10
   4  -2  -7 1519.45   54.29
   4  -2  -7 1443.56   35.70
   4   2  -7 1472.45   36.10
   4   2  -7 1447.56   35.20
   3  -2  -7    1.60    1.30
   3  -2  -7    2.20    1.00
   3  -2  -7    1.00    3.30
  -3  -2   7    4.50    1.70
   3  -2  -7    3.30    1.60
   3   2  -7    4.00    1.40
  -2  -2   7  581.64   14.50
   2  -2  -7  489.55   26.40
   2  -2  -7  581.54   14.10
   2   2  -7  607.14   15.70
  -1  -2   7   64.79    3.90
   1  -2  -7   63.19    3.60
   1   2  -7   58.89    3.50
  -1   2   7   59.89   11.40
   0  -2  -7  120.99    5.00
   0  -2   7  114.89    4.90
   0   2   7  109.89   13.80
   0   2  -7  134.69    5.20
  -1  -2  -7  216.28   19.40
   1  -2   7  223.78   12.80
   1  -2   7  199.88    6.60
   1   2   7  195.58    6.90
   1   2   7  182.68   18.70
  -1   2  -7  203.28    7.10
   2  -2   7 1083.49   25.90
  -2  -2  -7 1065.29   25.90
   2   2   7 1093.89   25.90
  -2   2  -7 1103.29   27.20
   3  -2   7  128.69    5.20
  -3  -2  -7  139.49    5.10
   3   2   7  129.79    5.20
  -3   2  -7  130.39    5.60
  -3   2  -7  127.59    5.70
   4  -2   7    0.50    1.60
  -4  -2  -7    1.30    1.40
   4   2   7    0.20    1.60
  -4   2  -7    1.60    2.30
   5  -2   7    2.60    1.80
  -5  -2  -7    1.10    1.50
   5   2   7    2.00    3.20
   6  -2   7    4.40    2.00
  -6  -2  -7    2.90    1.80
   6   2   7    4.70    1.90
   6   2   7    3.90    3.20
  -6   2  -7    2.80    1.70
  -7  -2  -7  121.59    5.60
   7  -2   7  122.39    5.70
  -7   2  -7  121.29    5.60
   7   2   7  120.49    5.70
   8  -2   7   11.00    2.80
  -8  -2  -7    9.00    2.10
   8   2   7    9.50    2.30
  -8   2  -7    9.20    2.20
   9  -2   7  316.27    9.60
  -9  -2  -7  317.07    9.70
  -9   2  -7  307.67    9.60
   9   2   7  310.47    9.50
 -10  -2  -7  344.77   10.10
  10   2   7  352.76   10.10
 -10   2  -7  334.37   10.00
 -11  -2  -7  227.58    6.90
  11   2   7  212.68    7.10
 -11   2  -7  221.68    6.90
 -12  -2  -7   44.30    2.80
 -12   2  -7   46.30    2.70
 -13  -3   7   65.59    2.90
 -13  -3   7   65.79    3.10
 -13   3   7   57.79    2.90
 -13   3   7   64.19    3.00
 -12  -3   7  533.25   13.90
 -12  -3   7  546.55   14.60
 -12   3   7  531.65   14.20
  12   3  -7  561.44   14.40
 -12   3   7  504.55   13.50
 -11  -3   7   42.70    3.70
 -11  -3   7   47.50    4.50
 -11   3   7   39.40    4.10
 -11   3   7   44.90    4.00
 -10  -3   7  161.88    7.40
 -10  -3   7  154.38    6.40
 -10   3   7  157.88    6.90
 -10   3   7  157.68    6.50
  -9  -3   7  214.08    7.90
  -9  -3   7  216.38    8.70
  -9   3   7  221.48    8.30
  -9   3   7  220.18    7.90
  -8  -3   7   11.80    2.90
  -8  -3   7    8.60    2.40
  -8   3   7    8.30    3.90
  -8   3   7   10.80    3.10
  -7  -3   7  274.27    9.90
  -7  -3   7  266.07    8.90
  -7  -3   7  262.27    8.70
  -7   3   7  253.17    8.70
  -7   3   7  264.97    9.20
  -7   3   7  242.28    9.50
  -6  -3   7   12.80    3.50
  -6  -3   7   18.40    2.70
  -6  -3   7   23.60    3.40
   6  -3  -7   18.20   10.90
  -6   3   7   21.40    3.50
  -6   3   7   26.40    3.10
  -5  -3   7  916.51   23.50
  -5  -3   7  970.50   23.10
   5  -3  -7  944.31   42.50
   5   3  -7  918.81   24.80
  -4  -3   7  218.48    7.50
   4  -3  -7  222.58   18.30
   4  -3  -7  217.98    8.00
   4   3  -7  226.68    7.70
   4   3  -7  218.68    8.40
  -4   3   7  228.38    7.90
   3  -3  -7  657.93   30.80
  -3  -3   7  576.84   15.80
   3  -3  -7  678.23   15.50
  -3   3   7  611.04   16.20
   3   3  -7  609.44   16.40
   3   3  -7  602.14   17.20
  -2  -3   7  245.78    7.60
   2  -3  -7  248.28   19.90
   2   3  -7  246.28    8.50
  -2   3   7  253.47    8.10
   1  -3  -7 2309.27   53.59
  -1  -3   7 2399.56   54.19
   1   3  -7 2356.16   55.69
  -1   3   7 2415.96   54.59
   0  -3  -7  536.25   14.10
   0  -3   7  564.34   14.30
   0   3  -7  550.44   15.30
   0   3   7  554.04   14.70
   1  -3   7 1879.51   43.10
   1   3   7 1872.41   43.00
  -1   3  -7 1842.62   44.50
  -2  -3  -7   59.89    4.10
   2  -3   7   73.59    4.00
   2  -3   7   71.29    9.00
   2  -3   7   67.99    4.20
  -2  -3  -7   77.59   14.40
   2   3   7   79.99    4.10
  -2   3  -7   70.89    4.30
   3  -3   7   27.10    3.20
  -3  -3  -7   22.80    2.90
   3  -3   7   21.00    3.30
  -3   3  -7   23.40    3.70
   3   3   7   26.40    3.30
  -3   3  -7   20.00    2.80
  -4  -3  -7  164.18    6.10
   4  -3   7  163.78    6.20
   4  -3   7  168.98    5.80
   4   3   7  160.48    7.30
   4   3   7  172.38    6.30
  -4   3  -7  172.78    6.40
  -5  -3  -7  319.27    9.60
   5  -3   7  318.77    9.60
  -5   3  -7  314.37    9.60
   5   3   7  315.97    9.70
   5   3   7  312.97   10.40
   6  -3   7  221.68    7.80
  -6  -3  -7  218.58    7.60
   6   3   7  218.58    7.70
   6   3   7  217.98    8.50
  -6   3  -7  211.68    7.60
   7  -3   7   66.19    5.10
  -7  -3  -7   67.89    4.50
  -7   3  -7   63.29    4.30
   7   3   7   66.69    4.60
   7   3   7   71.19    6.00
  -8  -3  -7    8.20    2.20
   8  -3   7    2.30    3.20
   8   3   7    1.90    2.20
   8   3   7    7.30    3.40
  -8   3  -7    7.00    2.30
  -9  -3  -7   17.20    2.50
   9   3   7   11.60    1.80
  -9   3  -7   18.10    2.60
  10  -3   7    1.50    1.70
 -10  -3  -7    2.80    1.40
  10   3   7   -2.70    1.50
 -10   3  -7   -0.20    1.20
 -11  -3  -7  137.99    5.20
  11   3   7  142.99    6.70
 -11   3  -7  121.59    5.80
 -13  -4   7   17.10    1.90
 -13  -4   7   19.30    2.10
 -13   4   7   16.20    1.80
 -12  -4   7  107.59    4.60
 -12  -4   7  113.49    4.20
 -12   4   7  106.29    4.30
 -12   4   7  115.79    4.40
 -11  -4   7  256.07    8.80
 -11  -4   7  258.27    9.30
 -11   4   7  238.28    7.50
 -11   4   7  266.07    8.90
 -10  -4   7   20.20    3.10
 -10  -4   7   23.20    3.50
 -10   4   7   24.10    3.60
 -10   4   7   25.90    3.20
  -9  -4   7  116.59    5.70
  -9  -4   7  117.99    6.50
  -9   4   7  109.39    5.80
  -9   4   7  116.59    6.30
  -8  -4   7  164.98    6.90
  -8  -4   7  168.68    6.90
  -8  -4   7  166.48    7.80
  -8   4   7  159.18    7.30
  -8   4   7  162.18    7.00
  -7  -4   7  527.05   15.90
  -7  -4   7  533.65   15.00
  -7  -4   7  546.35   14.90
  -7   4   7  548.65   15.10
  -7   4   7  541.25   14.30
  -6  -4   7  134.89    6.00
  -6  -4   7  128.59    6.40
  -6   4   7  142.79    6.10
  -6   4   7  141.09    6.60
  -5  -4   7    5.70    3.00
  -5  -4   7    1.80    2.00
  -5   4   7    4.50    4.00
  -5   4   7    5.50    2.60
  -5   4   7    4.40    2.80
  -4  -4   7 2077.69   47.80
   4  -4  -7 2066.69   73.19
  -4  -4   7 2032.00   48.20
  -4   4   7 2090.59   48.20
  -4   4   7 2060.89   47.60
   4   4  -7 2047.80   47.70
   3  -4  -7 1036.70   45.20
  -3  -4   7  997.20   24.40
  -3   4   7 1017.20   24.90
   3   4  -7  999.10   26.40
   3   4  -7  988.40   25.40
  -2  -4   7 1444.86   33.80
   2  -4  -7 1444.96   59.19
   2   4  -7 1410.16   35.80
  -2   4   7 1472.35   34.40
  -1  -4   7  194.98    6.50
  -1  -4   7  174.08    6.30
  -1   4   7  192.78    6.90
   1   4  -7  180.58    7.40
   0  -4   7    4.80    1.90
   0  -4   7    5.50    1.90
   0   4   7    6.70    2.80
   0   4  -7    8.60    1.90
   1  -4   7    5.30    1.80
  -1  -4  -7    0.80    7.40
   1  -4   7    6.20    2.00
   1   4   7    6.20    2.30
   1   4   7    6.40    2.00
   2  -4   7  207.98    7.00
  -2  -4  -7  207.08   24.60
   2  -4   7  204.38    6.40
   2   4   7  202.08    6.90
   2   4   7  186.98    8.70
  -2   4  -7  186.38    7.80
   2   4   7  208.28    7.40
  -3  -4  -7   63.69    4.00
   3  -4   7   62.19    4.40
   3  -4   7   66.39    3.80
   3   4   7   63.89    5.30
   3   4   7   60.59    4.20
  -3   4  -7   61.09    5.30
   4  -4   7  300.87    8.70
   4  -4   7  316.67   10.00
  -4   4  -7  313.17    9.50
   4   4   7  305.17    9.40
  -4   4  -7  309.17    9.90
   4   4   7  292.17   10.00
   5  -4   7   14.40    2.80
   5  -4   7   19.40    3.00
  -5  -4  -7   12.30    2.10
   5   4   7   22.20    3.30
  -5   4  -7   17.80    2.60
  -5   4  -7   12.90    2.50
   5   4   7   19.30    3.20
  -6  -4  -7   -0.50    1.70
   6  -4   7    3.10    2.80
   6  -4   7    3.00    1.80
   6   4   7    5.30    2.60
  -6   4  -7    3.40    3.00
  -6   4  -7    3.40    2.00
   6   4   7    3.50    2.10
  -7  -4  -7    0.50    1.90
   7  -4   7    3.60    1.90
   7   4   7   -0.50    1.90
   7   4   7    0.70    2.50
  -7   4  -7    2.80    2.00
  -8  -4  -7    4.70    1.40
   8   4   7    8.60    2.90
   8   4   7    5.00    1.60
  -8   4  -7    2.30    1.50
  -9  -4  -7  251.07    8.10
   9  -4   7  253.67    7.30
   9   4   7  249.08    8.20
   9   4   7  242.88    7.90
  -9   4  -7  250.57    7.90
 -10  -4  -7  104.29    4.30
  10  -4   7   96.49    4.00
 -10   4  -7  101.49    4.30
  11  -4   7    5.00    2.20
 -11  -4  -7    2.80    1.40
 -11   4  -7    0.80    1.30
  11   4   7    2.60    1.60
 -12  -5   7   41.90    2.80
 -12  -5   7   43.90    2.50
 -12   5   7   39.30    2.50
  12   5  -7   42.30    3.30
 -11  -5   7    3.50    1.40
 -11  -5   7    2.50    1.50
 -11   5   7    0.90    1.30
 -10  -5   7    1.10    2.30
 -10  -5   7    0.50    2.00
 -10   5   7    1.80    1.90
  -9  -5   7   25.70    3.70
  -9  -5   7   26.30    3.50
  -9  -5   7   23.70    4.50
  -9   5   7   25.50    3.80
  -8  -5   7  309.77   10.00
  -8  -5   7  318.17   10.20
  -8  -5   7  295.07   10.90
  -8   5   7  310.07    9.50
  -8   5   7  311.47   10.10
  -7  -5   7 1081.99   27.20
  -7  -5   7 1088.99   27.10
  -7  -5   7 1084.19   28.10
  -7   5   7 1104.19   27.30
  -7   5   7 1092.69   26.90
  -6  -5   7   49.00    4.10
  -6  -5   7   43.10    4.80
  -6   5   7   33.60    4.70
  -6   5   7   43.30    4.30
  -6   5   7   44.60    6.00
  -5  -5   7  245.08    8.40
  -5  -5   7  265.77    9.00
  -5  -5   7  250.37    7.70
  -5   5   7  254.07    8.20
  -5   5   7  253.47    9.00
   5   5  -7  245.58    9.40
  -5   5   7  257.97    9.00
  -4  -5   7  131.89    5.70
  -4  -5   7  125.09    6.60
  -4  -5   7  128.29    5.00
  -4   5   7  126.79    6.10
  -4   5   7  122.89    5.60
   4   5  -7  127.29    6.00
  -4   5   7  124.39    7.30
  -3  -5   7 1260.67   29.30
  -3  -5   7 1199.18   28.40
  -3  -5   7 1196.38   29.70
  -3   5   7 1213.28   30.50
  -3   5   7 1197.78   28.90
   3   5  -7 1234.38   29.30
   2  -5  -7  669.33   43.80
  -2  -5   7  737.03   18.10
  -2  -5   7  718.73   17.50
  -2   5   7  714.93   18.00
   2   5  -7  734.73   18.20
  -2   5   7  714.83   18.60
  -1  -5   7  410.46   11.00
  -1  -5   7  392.96   10.60
   1   5  -7  392.56   11.20
  -1   5   7  390.96   11.30
  -1   5   7  398.66   11.70
   0  -5   7    8.30    2.10
   0  -5   7    3.70    1.80
   0  -5  -7    0.80   11.90
   0  -5   7    4.00    2.00
   0   5  -7    4.20    1.70
   0   5   7    5.50    2.20
   1  -5   7  371.46   10.20
   1  -5   7  385.26   10.90
   1  -5   7  385.26   10.30
   1   5   7  380.56   11.70
   1   5   7  386.46   11.00
   1   5   7  356.26   12.90
   2  -5   7  747.83   19.20
   2  -5   7  768.82   18.90
  -2   5  -7  746.33   19.20
   2   5   7  777.02   19.90
   2   5   7  764.82   19.20
   2   5   7  748.43   19.70
   3  -5   7    0.20    1.60
   3  -5   7   -1.20    2.10
  -3  -5  -7    8.30    2.20
   3  -5   7    0.60    2.70
   3   5   7    2.70    2.10
   3   5   7    2.10    2.50
  -3   5  -7    3.20    1.90
   4  -5   7  229.78    8.40
   4  -5   7  221.88    7.00
  -4  -5  -7  218.08    7.60
   4   5   7  207.08    8.20
  -4   5  -7  211.88    7.90
   4   5   7  220.48    7.70
  -4   5  -7  223.08    7.70
   5  -5   7 2063.69   48.20
  -5  -5  -7 2115.59   49.20
   5   5   7 2156.28   49.10
  -5   5  -7 2046.70   48.80
   5   5   7 2079.69   49.30
  -5   5  -7 2102.09   48.80
  -6  -5  -7   93.69    5.10
   6  -5   7   94.89    4.60
  -6   5  -7  103.59    6.10
   6   5   7   90.99    5.20
  -6   5  -7   92.19    5.10
   6   5   7  101.49    5.80
   7  -5   7   -1.90    1.70
  -7  -5  -7   -0.50    2.00
  -7   5  -7    0.50    2.20
   7   5   7    2.90    2.30
   7   5   7    1.90    2.10
   8  -5   7   59.89    3.20
  -8  -5  -7   64.29    3.80
   8   5   7   63.99    3.70
  -8   5  -7   62.29    3.60
   8   5   7   69.39    5.20
   9  -5   7    6.00    1.50
  -9  -5  -7    6.10    1.50
   9   5   7    4.50    1.50
   9   5   7    4.50    2.10
  -9   5  -7    3.40    1.40
  10  -5   7   47.50    3.00
 -10  -5  -7   49.80    3.00
 -10   5  -7   54.29    3.40
 -11  -5  -7   24.60    2.70
  11   5   7   20.50    2.60
 -12  -6   7    2.40    1.20
 -12  -6   7    2.10    1.40
 -12   6   7    1.20    1.10
  12   6  -7    2.00    1.60
 -11  -6   7  278.07    7.80
 -11  -6   7  282.27    8.60
 -11   6   7  274.37    8.10
 -10  -6   7   86.39    3.90
 -10   6   7   83.19    4.10
  10   6  -7   83.29    4.10
  -9  -6   7   24.20    4.40
  -9  -6   7   25.60    3.10
  -9  -6   7   26.10    3.70
  -9   6   7   31.10    3.70
  -9   6   7   40.50    4.90
  -8  -6   7  207.78    7.50
  -8  -6   7  197.78    8.00
  -8  -6   7  195.48    8.40
  -8   6   7  193.48    7.50
  -8   6   7  202.58    7.00
  -7  -6   7  128.59    6.30
  -7  -6   7  126.59    6.10
  -7   6   7  133.79    5.80
  -7   6   7  121.69    6.00
  -6  -6   7 1169.68   28.40
  -6  -6   7 1224.78   29.60
  -6  -6   7 1215.58   29.70
  -6   6   7 1195.48   28.80
  -6   6   7 1208.98   29.60
  -6   6   7 1192.78   29.80
  -5  -6   7   30.40    4.80
  -5  -6   7   37.00    3.50
  -5  -6   7   37.10    4.00
   5   6  -7   38.20    4.20
  -5   6   7   38.60    4.70
  -5   6   7   32.60    4.00
  -5   6   7   39.80    5.00
  -4  -6   7  421.06   12.40
  -4  -6   7  404.76   11.80
  -4  -6   7  427.46   10.90
  -4   6   7  403.76   11.40
   4   6  -7  395.96   11.80
  -4   6   7  401.76   12.30
  -4   6   7  406.26   12.40
  -3  -6   7   65.49    5.70
  -3  -6   7   61.29    4.20
  -3  -6   7   65.89    3.80
   3   6  -7   68.99    4.40
  -3   6   7   53.99    4.80
  -3   6   7   67.79    4.70
  -3   6   7   55.89    4.00
  -2  -6   7   53.09    3.90
  -2  -6   7   49.80    3.50
  -2   6   7   47.40    5.10
   2   6  -7   49.60    4.00
  -2   6   7   43.50    4.30
  -2   6   7   50.89    4.00
  -1  -6   7  215.08    6.70
  -1  -6   7  209.38    7.20
  -1   6   7  211.48    7.20
  -1   6   7  215.58    7.90
   1   6  -7  208.88    7.30
  -1   6   7  212.78    8.90
   0  -6   7    7.70    1.90
   0  -6   7   10.70    2.00
   0   6  -7    7.50    1.90
   0   6   7    8.30    2.20
   0   6   7    5.00    3.10
   0   6   7    9.80    2.60
   1  -6   7    2.50    1.60
   1  -6   7    2.00    1.70
   1   6   7   -0.10    2.60
   1   6   7    0.50    2.70
  -1   6  -7    2.40    1.70
   1   6   7    2.60    2.00
   2  -6   7  118.59    4.80
   2  -6   7  113.09    6.10
   2   6   7  119.69    6.00
   2   6   7  116.09    6.20
   2   6   7  105.09    7.00
   2   6   7  129.89    6.00
  -2   6  -7  114.29    5.30
  -3  -6  -7   84.79    5.40
   3  -6   7   75.99    4.10
   3  -6   7   82.49    6.30
  -3   6  -7   81.59    4.60
   3   6   7   79.19    5.50
   3   6   7   84.59    5.50
   3   6   7   80.39    5.00
   4  -6   7 1026.70   25.20
  -4  -6  -7 1060.29   26.00
   4   6   7 1052.99   25.80
  -4   6  -7 1038.50   25.90
   4   6   7 1039.90   26.30
  -5  -6  -7  533.05   14.90
   5  -6   7  541.15   14.10
  -5   6  -7  543.95   14.80
   5   6   7  520.55   15.10
   5   6   7  530.05   14.70
  -5   6  -7  522.55   14.70
   6  -6   7 1919.11   44.40
  -6  -6  -7 1943.21   45.30
  -6   6  -7 1893.21   44.90
   6   6   7 1946.41   45.20
   6   6   7 1903.11   45.40
  -6   6  -7 1866.21   44.80
   7  -6   7   43.20    2.80
  -7  -6  -7   38.40    3.10
   7   6   7   41.80    3.20
  -7   6  -7   32.70    3.30
   7   6   7   43.90    4.30
  -8  -6  -7   40.80    3.00
   8  -6   7   37.80    2.80
   8   6   7   38.00    3.00
  -8   6  -7   46.10    3.20
   8   6   7   46.20    5.10
  -9  -6  -7    9.30    1.60
   9  -6   7    6.00    1.50
   9   6   7    7.30    1.50
   9   6   7    7.00    1.80
 -10  -6  -7  319.67    8.80
  10  -6   7  322.77    8.50
  10   6   7  319.37    8.90
 -11  -7   7   16.70    2.10
 -11  -7   7   18.40    2.40
  11   7  -7   21.30    2.50
 -10  -7   7  104.09    4.70
 -10  -7   7  114.69    4.20
  10   7  -7  116.29    4.40
 -10   7   7  110.29    4.40
  -9  -7   7  661.23   17.10
  -9  -7   7  656.13   16.40
  -9  -7   7  651.53   19.00
  -9   7   7  638.24   15.90
  -8  -7   7  245.68    8.20
  -8  -7   7  252.27    9.40
  -8  -7   7  251.57    8.30
  -8   7   7  240.78    8.40
  -8   7   7  249.68    7.90
  -7  -7   7   87.59    5.40
  -7   7   7   82.89    5.20
  -7   7   7   83.89    4.80
  -6  -7   7  904.21   23.10
  -6  -7   7  908.51   23.50
  -6   7   7  928.91   22.60
  -6   7   7  900.81   23.20
  -6   7   7  925.51   23.80
  -5  -7   7  188.78    7.40
  -5  -7   7  190.78    7.70
  -5  -7   7  202.18    6.40
  -5   7   7  185.88    7.50
  -5   7   7  185.98    8.10
   5   7  -7  187.68    8.00
  -5   7   7  195.48    6.90
  -4  -7   7  265.67    9.00
  -4  -7   7  271.57   11.10
  -4  -7   7  251.37    8.30
  -4   7   7  273.47    9.60
  -4   7   7  275.07    8.50
   4   7  -7  277.57    9.20
  -3  -7   7  151.58    7.10
  -3  -7   7  154.78    6.30
  -3  -7   7  159.88    5.50
   3   7  -7  159.08    6.60
  -3   7   7  155.08    7.00
  -3   7   7  125.49    7.20
  -2  -7   7   63.79    3.70
  -2  -7   7   61.29    5.40
  -2  -7   7   65.19    4.30
   2   7  -7   60.69    4.30
  -2   7   7   63.19    5.00
  -2   7   7   65.49    4.20
  -1  -7   7   62.79    3.70
  -1  -7   7   59.39    4.10
  -1   7   7   59.99    6.10
  -1   7   7   62.59    4.30
   1   7  -7   55.19    4.20
  -1   7   7   62.09    4.90
   0  -7   7   11.10    2.10
   0  -7   7    9.40    1.80
   0   7  -7   10.20    2.30
   0   7   7   12.40    2.50
   0   7   7   10.20    2.60
   0   7   7    5.60    2.90
   1  -7   7  223.98    7.40
   1  -7   7  215.88    7.00
  -1   7  -7  228.28    8.00
   1   7   7  226.78    8.40
   1   7   7  220.88    8.60
   1   7   7  222.38    7.80
   2  -7   7  338.37    9.80
  -2   7  -7  340.97   10.40
   2   7   7  326.87   10.90
   2   7   7  335.17   10.80
   2   7   7  326.57   10.50
  -3  -7  -7   15.90    2.80
   3  -7   7   13.40    2.10
  -3   7  -7   17.00    2.80
   3   7   7   14.30    2.90
   3   7   7   17.10    2.90
   3   7   7    9.50    2.70
  -4  -7  -7    6.60    2.30
   4  -7   7    6.00    1.80
  -4   7  -7   11.40    2.50
   4   7   7    6.70    2.60
   4   7   7    9.80    2.50
  -5  -7  -7  117.69    5.80
   5  -7   7  125.09    5.50
   5   7   7  125.79    6.10
   5   7   7  121.49    6.00
  -5   7  -7  134.09    6.20
  -6  -7  -7   -1.60    1.40
   6  -7   7    1.70    1.40
  -6   7  -7    3.80    2.30
   6   7   7    1.60    1.70
   6   7   7    3.20    2.20
  -7  -7  -7  862.11   21.70
   7  -7   7  886.11   21.20
   7   7   7  863.41   21.60
   7   7   7  856.81   22.00
  -8  -7  -7    4.40    1.50
   8  -7   7    3.10    1.40
   8   7   7    6.90    1.60
   8   7   7    5.50    1.50
  -9  -7  -7   13.60    2.50
   9  -7   7    7.20    1.50
   9   7   7   12.00    2.60
   9   7   7    7.70    1.60
 -10  -8   7    2.20    1.30
 -10  -8   7    0.80    2.00
  10   8  -7    1.50    1.40
  -9  -8   7   45.20    3.30
  -9  -8   7   43.80    3.20
  -9  -8   7   46.20    3.20
  -9   8   7   40.20    2.90
   9   8  -7   48.00    2.90
  -8  -8   7   66.69    3.80
  -8  -8   7   64.49    3.80
  -8   8   7   66.09    3.30
  -7  -8   7   51.09    3.70
  -7  -8   7   48.80    4.60
  -7   8   7   41.50    3.80
  -6  -8   7   92.69    4.70
  -6  -8   7   88.59    5.60
  -6   8   7   95.09    5.30
  -6   8   7  100.19    4.80
  -6   8   7  112.09    6.20
  -5  -8   7   97.89    5.60
  -5  -8   7  102.49    6.10
  -5   8   7   94.59    6.30
   5   8  -7   97.29    6.70
  -5   8   7   92.19    4.90
  -5   8   7  106.09    6.30
  -4  -8   7   17.50    2.80
  -4  -8   7   16.20    3.20
  -4   8   7   27.50    3.40
  -4   8   7   15.60    3.20
  -4   8   7   16.40    3.20
   4   8  -7   23.70    3.20
  -3  -8   7  108.09    6.30
  -3  -8   7  107.19    5.50
  -3   8   7  120.29    6.20
  -3   8   7  111.69    5.10
   3   8  -7  101.89    5.70
  -3   8   7  112.29    6.30
  -2  -8   7  533.45   14.60
  -2  -8   7  524.75   14.90
  -2   8   7  535.85   15.10
  -2   8   7  530.15   15.50
  -2   8   7  512.45   14.00
   2   8  -7  531.65   14.90
  -1  -8   7  231.58    7.90
  -1   8   7  217.78    9.00
   1   8  -7  226.18    8.10
  -1   8   7  236.08    9.00
  -1   8   7  223.58    7.60
   0  -8   7  592.44   15.50
   0   8   7  560.04   15.00
   0   8   7  563.04   16.00
   0   8   7  567.24   16.40
   0   8  -7  584.04   15.90
   1  -8   7  352.06   10.30
   1   8   7  342.47   11.30
   1   8   7  344.07   10.20
  -1   8  -7  341.77   10.70
   1   8   7  340.67   11.10
  -2  -8  -7  230.18    9.10
   2  -8   7  229.38    7.80
   2   8   7  233.08    9.00
  -2   8  -7  224.18    8.30
   2   8   7  230.08    8.60
   2   8   7  231.88    8.10
   3  -8   7   67.69    4.10
  -3  -8  -7   52.89    5.10
  -3   8  -7   56.19    4.70
   3   8   7   54.69    5.50
   3   8   7   55.49    4.80
   4  -8   7   11.70    1.70
   4   8   7    7.70    2.50
  -4   8  -7    8.20    1.90
   4   8   7    8.00    2.50
   5  -8   7    5.00    1.40
   5   8   7    4.60    2.00
   5   8   7    6.70    2.30
  -5   8  -7   10.30    1.90
  -6  -8  -7  147.29    5.60
   6  -8   7  151.88    5.20
   6   8   7  151.88    5.50
   6   8   7  154.18    6.40
  -6   8  -7  148.89    5.90
  -7  -8  -7  744.03   18.50
   7  -8   7  742.43   18.00
   7   8   7  725.83   18.60
   7   8   7  721.23   18.20
  -8  -8  -7  111.39    4.30
   8  -8   7  109.69    4.40
   8   8   7  106.39    4.20
   9  -8   7   -0.80    1.50
  -9  -8  -7   -3.60    2.20
   9   8   7   -1.20    1.40
   9   8   7    2.90    1.70
  -9  -9   7  143.09    5.10
  -9  -9   7  138.19    4.90
  -9   9   7  141.29    4.90
  -9   9   7  122.59    4.50
   9   9  -7  145.59    4.70
  -8  -9   7   91.79    4.10
  -8  -9   7   96.59    4.40
   8   9  -7   92.79    3.90
  -8   9   7  102.69    4.30
  -8   9   7   87.19    3.50
  -7  -9   7   48.30    3.40
  -7  -9   7   54.49    3.60
  -7   9   7   56.19    3.60
  -7   9   7   51.99    2.80
  -6  -9   7   98.09    4.90
  -6  -9   7  103.29    4.70
  -6   9   7   93.59    5.70
  -6   9   7   98.39    4.60
  -6   9   7  101.59    5.30
  -5  -9   7    0.90    3.30
  -5  -9   7    2.60    1.60
  -5   9   7    3.20    2.30
  -5   9   7   -2.20    2.40
  -5   9   7    2.50    1.80
   5   9  -7    3.70    3.00
  -4  -9   7   17.50    3.60
  -4  -9   7   10.10    1.70
   4   9  -7   10.90    2.30
  -4   9   7   10.80    2.20
  -4   9   7    9.40    2.00
  -4   9   7    9.30    2.70
  -3  -9   7   85.69    6.50
  -3  -9   7   87.89    4.60
  -3   9   7   89.39    5.70
   3   9  -7   85.39    4.60
  -3   9   7   93.49    4.70
  -3   9   7   92.19    5.20
  -2  -9   7  126.99    7.20
  -2  -9   7  135.69    6.80
  -2   9   7  140.39    5.60
   2   9  -7  121.69    7.80
  -2   9   7  157.98    8.00
  -1  -9   7  136.79    6.10
  -1  -9   7  130.29    7.20
  -1   9   7  133.99    7.20
   1   9  -7  139.79    6.50
  -1   9   7  137.19    5.60
  -1   9   7  148.99    7.20
   0  -9   7   84.79    6.10
   0  -9   7   86.09    5.10
   0   9   7   89.29    5.80
   0   9  -7   88.29    5.30
   0   9   7   82.39    6.00
   0   9   7   84.99    4.60
   1  -9   7   29.10    3.90
   1   9   7   41.90    5.40
   1   9   7   44.00    3.90
   1   9   7   39.30    4.70
   2  -9   7  171.88    6.20
  -2  -9  -7  206.58    7.30
   2   9   7  167.68    6.90
   2   9   7  170.28    6.80
   2   9   7  175.08    7.30
  -2   9  -7  174.98    6.60
   3  -9   7   30.60    2.90
  -3  -9  -7   26.40    3.10
  -3   9  -7   38.00    3.20
   3   9   7   27.10    3.80
   3   9   7   37.20    4.20
  -4  -9  -7  132.69    5.40
   4  -9   7  137.19    5.10
  -4   9  -7  134.19    5.30
   4   9   7  139.99    6.30
   5  -9   7   10.30    1.50
  -5  -9  -7    9.60    1.50
  -5   9  -7   12.50    2.00
   5   9   7   10.80    2.10
  -6  -9  -7    5.30    1.50
   6  -9   7    6.30    1.40
   6   9   7    5.80    1.40
  -6   9  -7    9.80    4.30
   6   9   7    4.60    2.60
   7  -9   7    7.70    1.40
  -7  -9  -7    8.10    1.60
   7   9   7    5.40    1.30
   7   9   7    3.10    2.20
   8  -9   7    1.90    1.40
   8   9   7    2.60    1.20
  -8 -10   7  188.78    6.00
  -8 -10   7  189.38    5.90
   8  10  -7  189.58    5.60
  -8  10   7  184.18    5.50
  -8  10   7  173.98    5.90
  -7 -10   7  514.75   13.80
  -7 -10   7  522.55   13.60
   7  10  -7  523.25   13.40
  -7  10   7  513.65   13.20
  -7  10   7  514.65   12.80
  -6 -10   7    3.90    1.50
  -6  10   7    2.10    1.40
  -6  10   7    3.90    1.10
  -5 -10   7  254.97    7.90
  -5  10   7  243.38    8.10
  -5  10   7  243.98    7.60
  -5  10   7  242.88    7.20
  -4 -10   7   86.29    4.30
  -4  10   7   91.59    4.70
   4  10  -7   93.69    4.80
  -4  10   7   92.69    4.50
  -3 -10   7   17.90    2.10
   3  10  -7   23.10    3.20
  -3  10   7   25.10    3.10
  -3  10   7   20.50    3.10
  -2 -10   7    2.50    1.50
  -2  10   7    0.10    1.70
  -2  10   7   -0.10    1.90
   2  10  -7   -0.30    1.70
  -1 -10   7   26.50    2.80
   1  10  -7   20.50    2.90
  -1  10   7   18.20    3.10
  -1  10   7   31.40    3.30
   0 -10   7  228.88    7.50
   0  10   7  228.68    8.20
   0  10   7  232.88    7.40
   0  10   7  233.28    8.50
   0  10  -7  231.38    7.80
   1 -10   7  249.28    7.90
  -1 -10  -7  269.07    8.90
   1  10   7  254.27    8.80
   1  10   7  235.18    9.20
   1  10   7  253.57    8.60
  -1  10  -7  253.57    8.20
  -2 -10  -7  508.25   13.70
   2 -10   7  491.35   13.30
   2  10   7  493.15   14.00
   2  10   7  505.15   12.70
  -2  10  -7  492.25   13.70
   3 -10   7   50.29    3.00
  -3 -10  -7   39.60    3.00
  -3  10  -7   50.19    3.30
   3  10   7   54.09    3.30
   4 -10   7   26.30    2.50
  -4 -10  -7   24.10    2.70
  -4  10  -7   25.10    2.90
   4  10   7   24.90    2.50
   5 -10   7   39.20    2.60
  -5 -10  -7   37.50    3.20
  -5  10  -7   41.30    3.30
   5  10   7   40.10    2.60
  -6 -10  -7  358.76    9.80
   6 -10   7  376.36    9.70
   6  10   7  371.96    9.90
  -7 -11   7   95.19    3.90
  -7 -11   7   94.19    4.20
   7  11  -7  102.49    3.40
  -7  11   7   94.99    3.10
  -6 -11   7  114.49    4.40
  -6 -11   7  119.09    4.40
  -6  11   7  114.29    3.70
   6  11  -7  118.49    4.10
  -5 -11   7   -0.20    1.50
  -5  11   7    1.40    1.00
   5  11  -7    1.70    1.10
  -4 -11   7   43.70    3.10
   4  11  -7   53.69    4.90
   4  11  -7   51.59    2.70
  -4  11   7   46.30    2.40
  -4  11   7   51.09    3.60
  -3 -11   7    6.40    1.50
   3  11  -7    8.00    1.40
   3  11  -7    5.00    2.20
  -3  11   7    6.60    1.90
  -3  11   7    4.50    1.10
  -2 -11   7   35.10    2.90
  -2  11   7   35.90    3.30
   2  11  -7   36.70    3.20
  -2  11   7   36.70    2.30
   2  11  -7   38.40    2.70
  -1 -11   7  121.09    4.70
  -1  11   7  122.49    5.30
   1  11  -7  119.69    4.90
   1  11  -7  124.59    4.50
  -1  11   7  122.09    4.30
   0 -11   7   85.19    4.00
   0  11  -7   94.89    4.20
   0  11   7   88.29    4.40
   0  11   7   89.89    4.50
   0  11   7   92.69    3.60
  -1 -11  -7   -2.80    1.50
   1 -11   7    0.30    1.40
   1  11   7   -0.80    1.80
  -1  11  -7    1.40    1.50
   1  11   7    0.90    1.40
   1  11   7   -3.70    1.90
   2 -11   7  131.29    4.80
  -2 -11  -7  132.79    4.90
  -2  11  -7  134.29    5.10
   2  11   7  133.69    4.70
  -3 -11  -7  118.49    5.40
   3 -11   7  117.79    4.40
   3  11   7  119.99    4.30
  -3  11  -7  116.89    4.60
  -4 -11  -7   67.49    3.40
   4 -11   7   69.99    3.30
  -4  11  -7   67.79    3.60
   4  11   7   66.59    3.00
   5 -11   7   16.30    2.20
   5  11   7   18.30    1.90
  -4 -12   7  523.75   13.30
   4  12  -7  530.15   14.00
  -4  12   7  538.25   12.80
  -3 -12   7   12.70    1.60
  -3  12   7   11.90    1.50
   3  12  -7   15.00    2.60
   3  12  -7   12.80    1.60
  -2 -12   7   35.00    2.70
  -2  12   7   33.30    2.90
   2  12  -7   30.60    2.90
   2  12  -7   33.00    3.30
  -2  12   7   32.90    1.90
  -1 -12   7   38.10    2.70
   1 -12  -7   34.90    3.10
  -1  12   7   28.20    3.00
  -1  12   7   30.80    2.00
   1  12  -7   29.10    2.80
   0 -12  -7   33.50    2.80
   0 -12   7   33.80    2.70
   0  12  -7   30.70    2.80
   0  12   7   36.20    2.10
  -1 -12  -7   -0.70    1.40
   1 -12   7    1.70    1.40
   1  12   7    0.70    1.80
  -1  12  -7   -0.60    1.50
   2 -12   7  132.69    4.40
  -2 -12  -7  130.49    4.50
  -2  12  -7  120.99    4.50
   2  12   7  121.89    4.20
 -13   0   8    1.30    1.10
 -13   0   8    0.20    1.20
 -12   0   8    2.00    1.40
 -12   0   8    1.30    1.40
 -11   0   8    0.90    2.10
 -11   0   8    0.40    2.00
 -10   0   8 1497.25   36.20
 -10   0   8 1537.75   37.00
  -9   0   8    0.50    2.10
  -9   0   8    0.60    2.30
  -8   0   8 2225.28   52.49
  -8   0   8 2293.57   53.29
  -7   0   8    9.40    2.70
  -7   0   8    2.60    3.20
  -6   0   8   55.09    7.50
  -6   0   8   62.99    5.30
   6   0  -8   46.20    6.00
   5   0  -8    0.00    2.20
   5   0  -8   -1.40    2.10
   4   0  -8 1777.52   42.80
   4   0  -8 1769.22   41.60
   3   0  -8    0.50    1.60
  -3   0   8   -0.80    1.90
  -2   0   8 1251.47   30.00
   2   0  -8 1286.87   31.70
   1   0  -8    1.10    1.40
  -1   0   8    0.90    1.70
   0   0   8 3798.32   89.19
   0   0  -8 4047.80   91.49
   0   0   8 4053.49  106.09
   1   0   8   10.70    1.90
  -2   0  -8   19.50    2.50
   2   0   8   21.30    3.10
  -2   0  -8   22.00    3.70
   3   0   8    5.60    1.90
  -3   0  -8   10.30    2.20
  -4   0  -8    3.60    1.90
  -4   0  -8    3.20    3.20
   4   0   8    1.90    1.70
   4   0   8   12.00    3.70
   5   0   8   -2.20    3.50
   5   0   8    1.70    1.80
  -5   0  -8   -0.30    1.70
  -6   0  -8  615.84   16.30
   6   0   8  599.84   16.20
  -7   0  -8    1.90    1.90
   7   0   8    1.60    2.00
  -8   0  -8  407.16   12.20
   8   0   8  387.36   12.50
   9   0   8   -1.00    1.80
  -9   0  -8    0.50    1.40
 -10   0  -8  399.36   11.20
  10   0   8  401.16   11.10
  11   0   8   -2.60    2.40
 -13  -1   8   -0.40    1.10
 -13  -1   8    1.50    1.20
 -13   1   8   -0.30    1.20
 -13   1   8    1.50    1.20
 -12  -1   8  351.86    9.80
 -12  -1   8  347.77   10.30
 -12   1   8  363.06    9.80
 -12   1   8  356.76   10.30
 -11  -1   8    8.80    2.20
 -11  -1   8   14.20    2.70
 -11   1   8   11.10    2.40
 -11   1   8   16.70    2.50
 -10  -1   8 1161.58   28.50
 -10  -1   8 1104.49   27.60
 -10   1   8 1108.19   27.40
 -10   1   8 1129.69   28.30
  -9  -1   8   41.20    5.00
  -9  -1   8   40.00    4.10
  -9   1   8   44.50    4.20
  -9   1   8   41.50    4.50
  -8  -1   8   42.60    5.10
  -8   1   8   43.40    4.60
  -8   1   8   40.70    4.80
  -7  -1   8  550.24   15.70
  -7  -1   8  534.65   14.80
  -7   1   8  543.05   14.80
  -7   1   8  545.55   15.40
  -7   1   8  529.55   14.30
  -6  -1   8   18.70    4.00
  -6  -1   8   28.30    3.60
  -6   1   8   26.30    5.30
  -6   1   8   28.00    3.20
   6   1  -8   20.80    4.60
  -6   1   8   21.10    3.60
   5  -1  -8   92.69    5.70
   5  -1  -8  100.59    5.20
   5   1  -8   93.99    5.40
   5   1  -8   92.79    5.90
   4  -1  -8   16.60    3.00
   4   1  -8   10.10    1.80
   3  -1  -8   28.50    3.60
  -3  -1   8   39.30    3.30
   3   1  -8   34.30    3.40
  -3   1   8   34.20    4.20
  -2  -1   8 6524.95  149.09
   2  -1  -8 6847.52  151.38
  -2   1   8 6591.44  148.99
   2   1  -8 6763.92  151.18
  -1  -1   8   10.50    1.90
   1  -1  -8   12.00    4.90
   1  -1  -8    8.50    1.60
   1   1  -8    9.20    1.60
  -1   1   8   11.10    2.20
  -1   1   8   12.40    6.20
   0  -1   8 1497.75   35.20
   0  -1  -8 1550.04   37.40
   0   1   8 1480.35   50.19
   0   1  -8 1518.35   37.10
   0   1   8 1500.95   35.20
  -1  -1  -8  100.79    4.70
   1  -1   8   86.69    4.30
  -1   1  -8   93.89    5.00
   1   1   8   87.49   15.20
   1   1   8   86.79    4.40
   2  -1   8   54.69    3.60
  -2  -1  -8   53.99    3.70
  -2   1  -8   46.80    4.30
   2   1   8   49.40    3.60
  -2   1  -8   54.99    4.80
   3  -1   8   53.49    3.70
  -3  -1  -8   54.89    3.60
  -3  -1  -8   41.50    5.10
  -3   1  -8   52.39    4.20
   3   1   8   55.39    3.90
  -3   1  -8   47.40    5.00
   4  -1   8 3229.98   73.19
   4  -1   8 3173.78   70.79
  -4  -1  -8 3107.29   70.79
  -4   1  -8 3074.89   70.69
   4   1   8 3061.79   71.09
  -4   1  -8 2975.90   72.89
  -5  -1  -8  161.78    6.20
   5  -1   8  159.68    6.30
  -5   1  -8  159.18    6.20
   5   1   8  154.38    7.60
   6  -1   8  117.59    5.60
  -6  -1  -8  116.29    5.40
   6   1   8  119.99    7.20
  -6   1  -8  117.79    5.40
   7  -1   8  216.08    7.80
  -7  -1  -8  219.38    7.90
  -7   1  -8  214.88    7.80
  -8  -1  -8  306.67   12.60
   8   1   8  282.87   11.40
  -9  -1  -8  132.59    5.40
   9  -1   8  134.19    5.50
  -9   1  -8  135.89    5.40
   9   1   8  135.99    5.50
  10  -1   8   44.10    3.90
 -10  -1  -8   40.80    2.90
 -10   1  -8   42.50    2.90
  10   1   8   36.40    3.20
 -11  -1  -8   32.60    3.90
 -11   1  -8   26.20    2.40
  11   1   8   21.80    3.30
 -13  -2   8   75.89    3.40
 -13  -2   8   77.79    3.10
 -13   2   8   80.69    3.20
 -13   2   8   79.29    3.30
 -12  -2   8  119.99    4.90
 -12  -2   8  123.19    4.60
 -12   2   8  124.19    4.80
 -12   2   8  121.79    4.50
 -11  -2   8    1.80    1.90
 -11  -2   8    2.80    2.20
 -11   2   8    3.10    2.20
 -11   2   8    1.90    2.10
 -10  -2   8  326.37   10.90
 -10  -2   8  317.77   10.00
 -10   2   8  327.37   10.50
 -10   2   8  323.07    9.90
  -9  -2   8   90.89    5.10
  -9  -2   8   85.39    5.80
  -9   2   8   79.49    5.30
  -9   2   8   83.99    5.10
  -8  -2   8 1004.70   24.80
  -8   2   8  968.40   24.90
  -7  -2   8    1.40    2.40
  -7  -2   8    1.00    2.40
  -7   2   8   -1.40    2.60
  -7   2   8    1.10    3.10
  -7   2   8    2.80    2.60
  -6  -2   8   32.40    4.40
  -6  -2   8   42.00    6.10
  -6  -2   8   37.50    4.30
  -6  -2   8   35.40    4.80
  -6   2   8   31.10    5.70
  -6   2   8   37.90    4.50
  -6   2   8   38.80    4.60
   5  -2  -8    3.90    2.70
  -5  -2   8   10.10    3.20
  -5  -2   8    2.70    2.70
   5   2  -8    6.50    2.70
  -5   2   8   12.50    2.60
   4  -2  -8  685.13   31.70
   4  -2  -8  608.44   17.60
   4   2  -8  600.94   16.80
   4   2  -8  618.74   17.80
   3  -2  -8  996.90   25.20
  -3  -2   8  980.20   23.40
   3  -2  -8  864.31   40.20
   3   2  -8 1003.10   25.30
   2  -2  -8  263.27    9.40
  -2  -2   8  269.97    8.20
  -2   2   8  274.47    9.20
   2   2  -8  271.27    9.30
   1  -2  -8  305.37   10.00
  -1  -2   8  334.27    9.40
  -1   2   8  320.57   23.80
   1   2  -8  327.07   10.40
  -1   2   8  317.17    9.30
   0  -2   8 1119.09   26.50
   0  -2  -8 1075.29   45.80
   0   2   8 1082.89   26.40
   0   2   8 1190.68   53.59
   0   2  -8 1062.59   28.00
   1  -2   8   36.20    3.10
  -1  -2  -8   35.90    3.70
   1   2   8   38.70    3.60
  -1   2  -8   32.80    3.60
   2  -2   8  102.19    4.60
  -2  -2  -8  110.39    4.70
   2   2   8  106.69    4.90
  -2   2  -8  106.39    5.70
   3  -2   8  227.68    7.40
  -3  -2  -8  237.58    7.40
   3   2   8  222.28    8.60
   3   2   8  226.48    7.40
  -3   2  -8  218.18    8.80
  -3   2  -8  220.08    7.70
  -4  -2  -8   93.59    4.50
   4  -2   8   90.39    4.60
   4   2   8   93.39    6.00
   4   2   8   92.39    4.50
  -4   2  -8   77.29    5.10
  -5  -2  -8   28.20    3.20
   5  -2   8   29.70    3.50
   5   2   8   29.00    3.30
   5   2   8   24.60    3.50
  -5   2  -8   25.60    3.40
  -6  -2  -8  334.07   10.10
   6  -2   8  321.57    9.90
   6   2   8  284.87   14.40
  -6   2  -8  310.77    9.80
   6   2   8  327.57    9.90
   7  -2   8    6.50    2.40
  -7  -2  -8    5.30    2.10
  -7   2  -8    9.70    2.30
   7   2   8    5.50    2.00
   7   2   8    5.30    3.20
   8  -2   8   33.60    3.60
  -8  -2  -8   29.40    2.90
   8   2   8   22.50    3.00
  -8   2  -8   27.80    2.90
  -9  -2  -8   41.60    3.10
   9  -2   8   46.50    4.00
  -9   2  -8   45.10    3.20
   9   2   8   44.70    3.50
 -10  -2  -8    8.40    1.50
  10   2   8   10.10    1.80
 -10   2  -8   14.30    2.40
 -11  -2  -8    8.70    1.40
 -11   2  -8   12.80    2.30
  11   2   8   10.70    1.90
 -13  -3   8  134.49    4.60
 -13  -3   8  134.29    4.30
 -13   3   8  137.19    4.50
 -13   3   8  122.39    4.20
 -12  -3   8   16.20    2.50
 -12  -3   8   17.20    2.10
 -12   3   8   17.40    2.70
 -12   3   8   16.00    2.20
 -11  -3   8   93.69    4.80
 -11  -3   8   95.69    5.50
 -11   3   8   88.99    4.10
 -11   3   8   90.49    5.50
 -10  -3   8   67.49    5.10
 -10  -3   8   71.09    4.50
 -10   3   8   73.09    4.80
 -10   3   8   73.59    4.90
  -9  -3   8    8.10    2.60
  -9  -3   8   10.00    2.30
  -9   3   8   10.50    2.50
  -9   3   8   10.30    2.90
  -8  -3   8  265.77    8.90
  -8  -3   8  246.18    9.50
  -8   3   8  248.48    8.70
  -8   3   8  260.17    9.20
  -8   3   8  262.47    9.70
  -7  -3   8  503.95   15.00
  -7  -3   8  517.15   14.30
  -7  -3   8  497.25   14.00
  -7   3   8  489.55   14.40
  -7   3   8  502.55   13.50
  -6  -3   8  115.89    5.70
  -6  -3   8  114.69    7.20
  -6  -3   8  110.89    5.10
  -6   3   8  112.49    5.50
  -6   3   8  116.19    7.00
  -5  -3   8  347.77    9.80
  -5  -3   8  349.57   11.00
  -5  -3   8  367.16   10.70
  -5   3   8  352.16   10.20
  -4  -3   8  245.88    9.00
   4  -3  -8  226.18    9.30
  -4  -3   8  240.88    8.10
   4  -3  -8  248.68   21.80
  -4   3   8  225.28    7.80
  -3  -3   8  310.77    9.50
   3  -3  -8  298.87   10.70
   3  -3  -8  306.07   25.40
   3   3  -8  301.37    9.80
   3   3  -8  310.07   10.80
  -2  -3   8 1888.71   44.10
   2   3  -8 1907.01   46.10
  -1  -3   8  330.97    9.20
  -1   3   8  305.47    9.60
   1   3  -8  295.57   10.40
   0  -3   8 2890.41   64.89
   0   3  -8 2755.82   66.79
   0   3   8 2885.21   64.69
   1  -3   8  626.34   15.90
  -1  -3  -8  638.44   37.70
   1   3   8  609.64   15.80
  -1   3  -8  600.14   17.50
  -2  -3  -8  652.83   16.20
   2  -3   8  629.54   16.10
  -2   3  -8  598.14   17.60
   2   3   8  606.84   16.60
  -3  -3  -8    3.10    1.60
   3  -3   8    0.60    5.20
   3  -3   8    4.00    2.40
   3  -3   8    4.70    2.00
   3   3   8    4.80    2.70
  -3   3  -8   -2.30    3.20
   3   3   8    5.50    1.90
  -3   3  -8    6.50    3.30
   4  -3   8  930.81   23.40
  -4  -3  -8  976.50   23.70
   4  -3   8  934.51   22.90
   4   3   8  969.00   24.00
  -4   3  -8  945.51   23.50
   4   3   8  947.61   23.50
   5  -3   8  589.74   15.90
   5  -3   8  598.64   15.30
  -5  -3  -8  620.74   16.20
   5   3   8  600.34   16.50
  -5   3  -8  590.34   15.90
   5   3   8  609.54   16.10
   6  -3   8  352.46   10.70
  -6  -3  -8  359.86   10.80
   6  -3   8  349.17   10.00
   6   3   8  354.86   10.80
  -6   3  -8  364.96   13.00
  -6   3  -8  351.06   10.70
   6   3   8  346.07   11.20
  -7  -3  -8   13.10    2.50
   7  -3   8   21.60    3.10
   7  -3   8   15.90    2.50
   7   3   8   15.80    3.20
  -7   3  -8   15.20    2.50
   7   3   8   11.40    2.30
   8  -3   8  162.28    5.60
   8  -3   8  162.48    6.40
  -8  -3  -8  163.08    6.20
   8   3   8  166.18    6.20
  -8   3  -8  159.58    6.00
   8   3   8  164.98    7.60
  -9  -3  -8   -0.50    1.30
   9  -3   8    0.20    1.90
   9   3   8   -1.20    1.70
  -9   3  -8    0.40    1.40
 -10  -3  -8  128.89    4.90
 -10   3  -8  125.69    4.80
  10   3   8  124.69    4.90
 -11  -3  -8    3.50    1.40
 -11   3  -8    4.80    1.40
  11   3   8    4.70    1.60
 -13  -4   8  185.38    5.20
 -13  -4   8  178.78    5.50
 -13   4   8  177.78    5.30
 -12  -4   8   72.89    3.40
 -12  -4   8   68.59    3.10
 -12   4   8   69.79    3.20
  12   4  -8   59.89    4.10
 -11  -4   8   15.40    2.30
 -11  -4   8   18.40    2.70
 -11   4   8   15.90    2.50
 -10  -4   8   40.80    3.90
 -10  -4   8   33.80    4.30
 -10   4   8   35.20    4.00
  -9  -4   8   12.20    2.40
  -9  -4   8    8.40    2.50
  -9   4   8    9.60    2.30
  -8  -4   8  104.99    6.40
  -8  -4   8  114.99    5.90
  -8  -4   8  119.99    5.90
  -8   4   8  121.89    5.60
  -8   4   8  111.99    5.90
  -7  -4   8  131.39    6.30
  -7  -4   8  136.49    6.20
  -6  -4   8  348.47   10.60
  -6  -4   8  344.37   11.80
  -6  -4   8  351.46   10.90
  -6  -4   8  334.17    9.70
  -6   4   8  341.17   10.00
  -6   4   8  348.17   11.00
  -5  -4   8  333.27    9.30
  -5  -4   8  336.17   10.60
  -5  -4   8  338.07   10.20
  -5   4   8  327.67   11.10
   5   4  -8  328.17   10.50
  -5   4   8  336.17    9.70
  -4  -4   8  286.07    9.20
  -4  -4   8  301.07    9.90
  -4  -4   8  306.87    8.50
   4  -4  -8  278.57   11.80
  -4   4   8  297.87    8.90
  -3  -4   8  654.53   16.30
   3  -4  -8  644.14   40.90
  -3  -4   8  662.43   16.90
  -3   4   8  664.93   16.80
  -3   4   8  674.43   17.50
  -2  -4   8  320.37    9.60
  -2  -4   8  313.47    9.00
  -2   4   8  326.07    9.50
  -2   4   8  334.87   10.10
  -1  -4   8   39.60    3.50
  -1  -4   8   39.90    4.20
  -1   4   8   34.30    3.80
  -1   4   8   41.60    5.10
   0  -4   8  865.01   21.00
   0  -4   8  902.51   21.80
   0  -4   8  894.51   21.30
   0   4   8  871.01   21.70
   0   4   8  847.12   22.70
   0   4   8  872.81   22.20
   1  -4   8  137.79    5.50
   1  -4   8  151.68    5.90
   1  -4   8  137.19    5.60
   1   4   8  139.59    6.80
   1   4   8  147.69    6.10
   2  -4   8  486.15   12.10
   2  -4   8  442.26   13.30
   2  -4   8  423.16   11.90
  -2  -4  -8  460.85   12.80
   2   4   8  434.76   13.20
   2   4   8  474.05   13.20
   3  -4   8  200.08    7.10
  -3  -4  -8  199.78    7.00
   3   4   8  191.98    7.70
   3   4   8  206.38    7.20
   4  -4   8 2220.18   51.19
   4  -4   8 2241.88   51.79
  -4  -4  -8 2280.27   52.09
   4   4   8 2216.68   51.89
  -4   4  -8 2201.88   51.89
  -4   4  -8 2230.98   51.69
   4   4   8 2255.37   52.29
   5  -4   8   10.90    2.70
   5  -4   8    7.80    2.00
  -5  -4  -8    5.50    1.90
   5   4   8    8.10    2.40
  -5   4  -8   10.30    2.50
   5   4   8    9.40    2.20
  -5   4  -8   10.50    2.70
   6  -4   8   31.00    4.80
  -6  -4  -8   30.40    3.70
   6  -4   8   34.00    3.50
   6   4   8   33.90    3.90
  -6   4  -8   32.90    5.20
   6   4   8   31.00    4.50
  -6   4  -8   34.70    4.10
  -7  -4  -8    7.70    2.60
   7   4   8    6.20    2.70
   7   4   8    5.60    2.50
   8  -4   8    0.50    1.70
  -8  -4  -8    2.20    1.30
   8   4   8    1.30    1.50
  -8   4  -8    1.40    1.50
   8   4   8    6.30    2.80
  -9  -4  -8   99.49    4.30
   9  -4   8   91.69    4.10
   9   4   8  101.69    6.20
   9   4   8  100.49    4.40
  -9   4  -8   96.59    4.20
 -10  -4  -8    0.40    1.40
  10   4   8   -0.50    1.50
 -10   4  -8    3.70    2.30
 -11  -4  -8   30.90    2.50
  11   4   8   32.50    2.70
 -11   4  -8   26.20    2.70
 -12  -5   8   80.09    3.10
 -12  -5   8   74.59    3.40
  12   5  -8   74.09    3.80
 -12   5   8   78.19    3.20
 -11  -5   8   53.59    3.50
 -11  -5   8   49.10    2.80
 -11   5   8   50.89    3.00
 -10  -5   8   41.80    3.80
 -10  -5   8   39.00    4.50
 -10   5   8   53.59    4.30
  -9  -5   8  190.38    7.10
  -9  -5   8  186.48    7.90
  -9   5   8  196.88    7.70
  -9   5   8  182.68    7.10
  -8  -5   8    6.60    2.50
  -8  -5   8   11.10    3.00
  -8  -5   8    3.30    2.20
  -8   5   8    6.70    2.30
  -8   5   8    2.50    2.20
  -7  -5   8  608.44   16.60
  -7  -5   8  606.04   17.50
  -7  -5   8  607.34   16.50
  -7   5   8  605.64   16.60
  -7   5   8  612.44   15.80
  -6  -5   8 3181.78   71.39
  -6  -5   8 3106.69   69.79
  -6  -5   8 3052.29   71.29
  -6   5   8 3056.99   71.19
  -5  -5   8   66.49    3.90
  -5  -5   8   69.19    5.30
  -5  -5   8   64.79    4.70
  -5   5   8   60.99    4.40
  -5   5   8   58.99    5.80
   5   5  -8   61.19    5.50
  -4  -5   8  907.31   22.80
  -4  -5   8  913.91   23.20
  -4  -5   8  920.01   21.80
   4   5  -8  894.31   22.80
  -4   5   8  905.41   23.30
  -4   5   8  934.61   22.40
  -3  -5   8   11.90    3.00
  -3  -5   8    6.70    2.20
  -3   5   8    8.50    2.20
   3   5  -8    9.60    2.30
  -3   5   8    4.60    2.20
  -2  -5   8   27.90    3.10
  -2  -5   8   19.90    2.80
  -2   5   8   18.60    2.50
  -2   5   8   27.30    3.70
  -2   5   8   15.90    4.00
   2   5  -8   29.40    3.40
  -1  -5   8   55.29    4.10
  -1  -5   8   49.50    3.50
  -1   5   8   53.99    6.10
  -1   5   8   43.00    4.10
  -1   5   8   50.89    4.30
   0  -5   8   83.19    4.40
   0  -5   8   78.49    4.00
   0  -5   8   80.79    4.50
   0   5   8   77.89    5.80
   0   5   8   83.09    4.90
   0   5   8   81.99    5.00
   1  -5   8  753.42   18.70
   1  -5   8  660.33   18.60
   1  -5   8  751.62   17.90
   1   5   8  739.53   19.30
  -1   5  -8  746.83   18.80
   1   5   8  733.73   18.50
   1   5   8  721.23   19.20
   1   5   8  732.33   18.70
   2  -5   8  209.18    7.50
  -2  -5  -8  222.28    8.20
   2  -5   8  220.18    7.00
   2  -5   8  187.88    6.70
   2   5   8  218.08    7.60
   2   5   8  213.28    8.40
  -2   5  -8  218.98    7.50
   2   5   8  220.28    8.10
   3  -5   8    2.10    2.00
  -3  -5  -8    5.80    2.00
   3  -5   8    9.30    2.00
   3  -5   8    5.30    2.30
   3   5   8    8.20    2.50
  -3   5  -8    7.70    2.20
   3   5   8    5.30    2.20
   4  -5   8   18.60    3.00
   4  -5   8   22.30    3.20
   4   5   8   20.40    2.70
  -4   5  -8   17.40    2.70
   4   5   8   18.70    2.80
   5  -5   8  716.13   19.30
  -5  -5  -8  738.23   19.40
   5  -5   8  758.02   18.70
   5   5   8  736.63   19.60
  -5   5  -8  743.23   19.30
  -5   5  -8  744.63   19.20
   5   5   8  744.93   19.30
   6  -5   8  313.67    9.40
  -6  -5  -8  328.67   10.20
  -6   5  -8  319.17   10.30
   6   5   8  305.07   10.00
  -6   5  -8  315.07   10.00
   6   5   8  307.37   10.20
  -7  -5  -8   31.20    3.00
   7  -5   8   36.10    2.80
   7   5   8   31.50    4.40
   7   5   8   32.20    3.00
  -7   5  -8   32.40    3.20
  -8  -5  -8  437.86   12.20
   8  -5   8  431.26   11.30
   8   5   8  428.96   12.00
  -8   5  -8  420.86   11.80
   8   5   8  434.06   12.10
  -9  -5  -8    3.00    1.40
  -9   5  -8    4.30    1.60
   9   5   8    0.00    2.00
   9   5   8    2.10    1.60
 -10  -5  -8   68.09    3.40
  10   5   8   70.29    3.40
 -10   5  -8   66.69    3.50
 -12  -6   8  115.29    4.00
 -12  -6   8  118.29    3.70
  12   6  -8  108.89    4.30
 -12   6   8  115.49    3.90
 -11  -6   8    1.40    1.30
 -11  -6   8    0.90    1.30
 -11   6   8    0.90    1.20
 -10  -6   8  101.69    4.70
 -10  -6   8  102.19    4.10
 -10   6   8   98.89    4.20
  10   6  -8  102.89    4.30
  -9  -6   8   40.00    3.70
  -9  -6   8   38.00    3.40
  -9  -6   8   44.40    4.60
  -9   6   8   32.70    3.20
  -9   6   8   42.20    4.00
  -8  -6   8  391.76   11.50
  -8  -6   8  381.76   11.40
  -8  -6   8  392.56   12.60
  -8   6   8  381.36   10.80
  -8   6   8  391.96   11.60
  -7  -6   8    3.90    2.20
  -7  -6   8    2.60    2.40
  -7  -6   8    1.40    2.60
  -7   6   8   -0.20    2.00
  -7   6   8    3.50    2.40
  -6  -6   8  552.64   15.20
  -6  -6   8  550.34   15.20
  -6  -6   8  547.05   13.80
  -6   6   8  519.85   15.00
  -6   6   8  541.75   14.40
  -5  -6   8  516.25   14.70
  -5  -6   8  532.25   14.70
  -5  -6   8  520.15   13.50
   5   6  -8  511.15   14.70
  -5   6   8  532.25   14.00
  -5   6   8  519.55   15.10
  -4  -6   8   40.70    4.90
  -4  -6   8   42.80    3.30
  -4  -6   8   45.90    4.10
  -4   6   8   38.00    4.20
  -4   6   8   36.10    4.10
   4   6  -8   37.80    4.40
  -4   6   8   43.50    4.60
  -3  -6   8    1.40    2.60
  -3  -6   8    7.10    1.80
  -3  -6   8    4.20    2.00
  -3   6   8    2.50    2.20
   3   6  -8    1.70    2.20
  -3   6   8   -0.10    2.00
  -2  -6   8  206.88    6.50
  -2  -6   8  212.08    7.40
  -2   6   8  200.08    7.90
  -2   6   8  194.88    9.00
  -2   6   8  210.88    7.10
   2   6  -8  204.58    7.40
  -1  -6   8  579.44   15.30
  -1  -6   8  596.54   14.70
  -1   6   8  584.44   16.30
   1   6  -8  584.64   15.70
  -1   6   8  563.04   16.10
  -1   6   8  571.54   15.10
   0  -6   8  182.68    5.90
   0  -6   8  173.28    6.30
   0   6   8  167.68    7.50
   0   6  -8  161.18    6.50
   0   6   8  174.98    6.60
   0   6   8  170.78    7.20
   1  -6   8    2.50    1.70
   1  -6   8   -0.90    1.80
  -1   6  -8    1.20    1.80
   1   6   8    2.50    2.20
   1   6   8    4.20    2.50
   1   6   8    5.30    2.70
   2  -6   8   22.70    3.10
   2  -6   8   24.20    3.00
   2  -6   8   22.10    3.10
   2   6   8   27.20    4.40
  -2   6  -8   23.10    3.60
   2   6   8   24.30    3.50
   2   6   8   31.80    4.90
   3  -6   8   30.90    5.10
  -3  -6  -8   30.80    4.00
   3  -6   8   28.80    3.30
   3   6   8   27.60    4.40
  -3   6  -8   29.40    3.70
   3   6   8   29.20    4.20
   4  -6   8    9.50    2.00
   4   6   8   10.00    2.50
   4   6   8    8.70    2.50
  -4   6  -8    7.00    2.30
  -5  -6  -8  537.65   15.00
   5  -6   8  536.55   14.30
  -5   6  -8  549.05   15.00
   5   6   8  545.05   15.30
   5   6   8  528.95   14.80
  -6  -6  -8   48.60    3.30
   6  -6   8   51.79    3.10
  -6   6  -8   48.40    4.20
   6   6   8   62.69    4.60
  -6   6  -8   41.60    4.10
   6   6   8   49.20    3.50
  -7  -6  -8  761.92   19.70
   7  -6   8  763.52   18.90
   7   6   8  795.12   20.00
   7   6   8  760.02   19.60
  -7   6  -8  770.92   19.40
   8  -6   8    0.60    1.60
  -8  -6  -8    1.80    1.40
   8   6   8    0.20    1.60
   8   6   8    3.40    1.60
   9  -6   8   66.29    3.60
  -9  -6  -8   76.29    3.50
   9   6   8   72.79    3.50
   9   6   8   71.49    3.70
 -10  -6  -8   45.90    2.90
  10   6   8   39.90    2.80
 -11  -7   8    1.10    1.20
 -11  -7   8   -0.20    1.50
  11   7  -8    3.10    1.60
 -10  -7   8   58.29    3.30
 -10  -7   8   60.99    3.00
  10   7  -8   56.09    3.20
 -10   7   8   61.69    3.00
  -9  -7   8  401.96   11.10
  -9  -7   8  395.56   11.60
  -9  -7   8  387.96   10.50
  -9   7   8  380.56   10.70
  -9   7   8  382.36   10.00
  -8  -7   8    3.30    2.50
  -8  -7   8    5.90    1.80
  -8  -7   8    6.30    2.30
  -8   7   8    3.10    2.10
  -8   7   8    6.20    2.10
  -7  -7   8  445.46   12.90
  -7  -7   8  453.95   12.90
  -7  -7   8  456.75   14.00
  -7   7   8  448.36   12.90
  -7   7   8  467.45   12.40
  -6  -7   8  143.79    6.50
  -6  -7   8  152.58    6.70
  -6   7   8  134.09    6.30
  -6   7   8  154.18    5.90
  -5  -7   8  730.53   19.10
  -5  -7   8  741.53   17.70
  -5  -7   8  735.03   19.30
  -5   7   8  753.02   19.80
  -5   7   8  728.23   18.50
  -5   7   8  668.33   18.80
   5   7  -8  718.53   19.20
  -4  -7   8 1884.41   44.30
  -4  -7   8 1870.81   44.30
  -4  -7   8 1897.01   43.00
  -4   7   8 1724.53   43.90
  -4   7   8 1937.11   45.10
  -4   7   8 1913.21   43.70
   4   7  -8 1876.71   44.20
  -3  -7   8    2.40    2.50
  -3  -7   8    4.30    2.20
  -3  -7   8    3.80    1.70
   3   7  -8    4.70    2.30
  -3   7   8    5.90    2.60
  -3   7   8    5.70    2.00
  -2  -7   8  289.37    8.30
  -2  -7   8  284.37    9.60
  -2  -7   8  286.07    9.20
   2   7  -8  274.77    9.30
  -2   7   8  280.77    8.80
  -2   7   8  293.97   10.10
  -2   7   8  285.57   10.50
  -1  -7   8   40.00    3.80
  -1  -7   8   45.20    3.20
   1   7  -8   46.50    4.10
  -1   7   8   42.20    3.90
  -1   7   8   46.60    4.60
   0  -7   8   81.49    4.60
   0  -7   8   85.99    4.10
   0   7   8   81.49    4.80
   0   7   8   80.59    5.80
   0   7  -8   74.89    4.80
   0   7   8   78.29    5.50
   1  -7   8    5.80    1.90
   1  -7   8    6.10    1.60
   1   7   8    8.20    2.40
   1   7   8    6.70    2.60
  -1   7  -8    8.30    2.20
   1   7   8    5.50    2.50
   2  -7   8   86.19    4.60
   2   7   8   83.59    5.60
  -2   7  -8   87.69    5.00
   2   7   8   89.59    5.50
   2   7   8   87.99    5.80
   3  -7   8   15.30    2.30
  -3  -7  -8   13.60    2.80
   3   7   8   15.60    2.90
  -3   7  -8   19.70    3.00
   3   7   8   13.50    3.20
  -4  -7  -8  449.06   13.50
   4  -7   8  476.75   13.00
   4   7   8  475.55   13.90
   4   7   8  490.55   13.70
  -4   7  -8  496.75   13.80
  -5  -7  -8  293.97    9.30
   5  -7   8  301.57    8.70
  -5   7  -8  297.77    9.20
   5   7   8  304.87    9.10
   5   7   8  316.17   10.00
  -6  -7  -8  104.89    4.60
   6  -7   8  106.79    4.20
   6   7   8  109.29    5.60
   6   7   8  104.19    4.60
  -6   7  -8  101.59    4.90
  -7  -7  -8 1031.00   25.40
   7  -7   8 1037.30   24.70
   7   7   8 1039.20   25.40
   7   7   8 1050.39   25.30
  -8  -7  -8  235.48    7.20
   8  -7   8  226.38    7.00
   8   7   8  245.88    7.20
   8   7   8  241.08    7.20
   9  -7   8   11.80    2.00
  -9  -7  -8   12.90    1.60
   9   7   8   14.90    1.70
   9   7   8   17.60    2.50
 -10  -8   8  101.89    3.90
 -10  -8   8  102.19    4.00
 -10   8   8  106.29    3.90
  10   8  -8   96.89    4.10
  -9  -8   8    2.20    1.50
  -9  -8   8    2.90    1.70
  -9  -8   8   -1.60    1.60
   9   8  -8    0.40    1.30
  -9   8   8   -0.60    1.50
  -8  -8   8    8.80    1.70
  -8  -8   8    9.70    1.80
  -8  -8   8   12.90    1.80
  -8   8   8   11.30    1.50
  -7  -8   8  488.75   14.40
  -7  -8   8  482.55   13.50
  -7   8   8  497.55   13.00
  -6  -8   8   10.00    2.60
  -6  -8   8    7.20    1.80
  -6   8   8   12.90    3.00
  -6   8   8   13.00    2.10
  -5  -8   8  237.88    8.10
  -5  -8   8  231.38    8.40
  -5   8   8  244.38    8.60
   5   8  -8  255.07    8.40
  -5   8   8  234.18    8.60
  -5   8   8  243.78    7.80
  -4  -8   8   56.29    5.00
  -4  -8   8   49.10    4.50
  -4   8   8   49.10    3.70
   4   8  -8   52.59    5.30
  -4   8   8   51.69    5.30
  -4   8   8   64.69    5.40
  -3  -8   8  478.85   13.60
  -3  -8   8  472.35   13.70
   3   8  -8  474.25   13.70
  -3   8   8  478.65   13.00
  -3   8   8  452.95   14.70
  -3   8   8  490.75   14.60
  -2  -8   8  235.98    8.80
  -2  -8   8  246.18    8.50
   2   8  -8  251.47    8.70
  -2   8   8  251.47    8.10
  -2   8   8  251.87    9.50
  -1  -8   8  370.56   11.20
   1   8  -8  383.46   11.60
  -1   8   8  374.66   12.30
  -1   8   8  370.26   11.70
  -1   8   8  370.76   10.70
   0  -8   8  268.07    8.80
   0   8  -8  271.97    9.20
   0   8   8  273.47   10.00
   0   8   8  268.17    9.50
   0   8   8  260.27    8.40
   1  -8   8    1.50    1.90
   1   8   8   -1.50    2.10
   1   8   8    1.40    2.40
   1   8   8   -0.60    2.40
  -1   8  -8   -1.70    1.90
  -2  -8  -8  354.86   11.50
   2  -8   8  330.17   10.10
   2   8   8  337.67   11.30
   2   8   8  335.37   10.80
   2   8   8  323.97   10.00
  -2   8  -8  340.77   10.80
   3  -8   8    7.00    1.60
  -3  -8  -8    5.60    1.70
  -3   8  -8    6.60    1.80
   3   8   8    4.90    2.40
   4  -8   8    6.20    1.50
  -4  -8  -8    2.90    1.40
  -4   8  -8    4.30    1.80
   4   8   8    5.80    2.20
   4   8   8    6.00    2.80
   5  -8   8  208.88    6.50
  -5  -8  -8  207.08    7.00
  -5   8  -8  209.78    7.00
   5   8   8  214.18    7.70
   5   8   8  195.98    7.00
   6  -8   8   41.30    2.80
  -6  -8  -8   39.70    2.90
  -6   8  -8   35.30    4.00
   6   8   8   36.40    2.90
   6   8   8   34.70    3.60
  -7  -8  -8   33.70    2.70
   7  -8   8   39.90    3.70
   7   8   8   37.00    2.60
   7   8   8   39.70    3.60
  -8  -8  -8   45.20    3.00
   8  -8   8   44.60    3.00
   8   8   8   49.30    2.70
   8   8   8   44.70    3.20
  -9  -9   8    6.60    1.30
  -9   9   8    2.20    1.60
  -9   9   8    5.50    1.30
   9   9  -8    6.00    1.20
  -8  -9   8   48.60    3.10
  -8  -9   8   43.20    3.00
   8   9  -8   47.30    2.60
  -8   9   8   44.40    2.90
  -8   9   8   43.50    2.30
  -7  -9   8   54.39    3.40
  -7  -9   8   56.39    3.70
  -7  -9   8   54.59    3.50
  -7   9   8   43.20    3.20
  -7   9   8   54.19    2.70
  -6  -9   8  169.98    6.00
  -6  -9   8  183.08    6.40
  -6   9   8  196.98    5.90
  -6   9   8  175.18    6.20
  -5  -9   8  139.19    5.60
  -5  -9   8  145.59    5.60
  -5   9   8  148.79    5.60
  -5   9   8  148.39    6.00
  -5   9   8  147.49    7.30
   5   9  -8  144.69    6.40
  -4  -9   8  274.07    8.80
  -4  -9   8  278.57    9.50
  -4   9   8  288.17    9.30
  -4   9   8  288.37    8.60
  -4   9   8  276.47    9.30
   4   9  -8  280.47    8.90
  -3  -9   8   41.00    5.20
  -3  -9   8   39.20    3.40
  -3   9   8   34.00    3.30
   3   9  -8   38.20    3.40
  -3   9   8   38.40    3.70
  -2  -9   8   46.80    5.10
  -2  -9   8   42.90    3.30
   2   9  -8   39.30    3.40
  -2   9   8   42.70    3.50
  -2   9   8   42.40    3.90
  -1  -9   8  264.37    8.50
  -1  -9   8  264.17    9.20
  -1   9   8  283.07    9.50
   1   9  -8  273.67    8.80
  -1   9   8  289.17    8.60
  -1   9   8  273.37    9.50
   0  -9   8   51.99    3.40
   0  -9   8   58.89    4.90
   0   9   8   54.59    4.10
   0   9   8   50.09    5.10
   0   9   8   55.49    4.00
   0   9  -8   56.49    3.60
  -1  -9  -8  238.88    8.30
   1  -9   8  209.78    7.00
   1   9   8  211.88    7.80
   1   9   8  219.48    7.20
   1   9   8  222.98    8.10
  -1   9  -8  206.38    7.30
  -2  -9  -8   31.60    3.30
   2  -9   8   22.50    2.70
   2   9   8   25.50    4.10
   2   9   8   22.20    3.00
  -2   9  -8   26.50    2.80
  -3  -9  -8  147.89    5.80
   3  -9   8  156.38    5.50
   3   9   8  155.08    6.50
  -3   9  -8  159.88    5.90
   4  -9   8  300.17    8.50
  -4  -9  -8  298.87    8.90
  -4   9  -8  288.67    8.90
   4   9   8  297.07    9.20
  -5  -9  -8  370.66   10.30
   5  -9   8  372.46   10.00
   5   9   8  373.36   10.40
  -5   9  -8  353.96   10.20
  -6  -9  -8   10.90    1.80
   6   9   8    9.10    1.40
   7  -9   8   85.89    3.60
  -7  -9  -8   84.19    3.60
   7   9   8   81.99    3.40
  -8 -10   8    8.40    1.40
  -8 -10   8    7.40    1.50
  -8  10   8   12.60    2.20
   8  10  -8    7.00    1.10
  -8  10   8    7.30    1.20
  -7 -10   8   85.39    3.80
  -7 -10   8   85.39    3.80
   7  10  -8   97.69    3.60
  -7  10   8   90.79    3.20
  -7  10   8   89.59    3.60
  -6 -10   8   41.60    3.00
  -6 -10   8   32.20    2.80
  -6  10   8   35.40    2.20
  -6  10   8   33.50    2.80
  -5 -10   8  268.27    8.20
  -5  10   8  268.87    7.60
  -4 -10   8    7.60    1.70
  -4  10   8    5.90    1.20
   4  10  -8    7.70    2.40
  -4  10   8    9.40    2.00
  -3 -10   8   67.19    3.80
  -3  10   8   64.59    3.20
   3  10  -8   72.29    4.00
  -3  10   8   71.49    4.20
  -2 -10   8   90.39    4.10
  -2  10   8   85.49    4.60
   2  10  -8   82.59    4.20
  -1 -10   8  169.98    6.10
  -1 -10   8  175.88    6.40
   1  10  -8  180.98    6.40
  -1  10   8  185.28    6.90
   0 -10   8   89.19    4.00
   0 -10   8   84.69    4.80
   0  10   8   92.59    3.80
   0  10   8   89.69    4.60
   0  10  -8   89.09    4.20
   0  10   8   81.29    4.30
   1 -10   8   -0.20    1.40
   1 -10   8    1.70    2.50
  -1  10  -8   -0.20    1.50
   1  10   8   -0.60    1.90
   1  10   8    1.20    1.80
   1  10   8    3.00    1.50
   2 -10   8  179.78    5.90
   2 -10   8  181.68    6.10
  -2 -10  -8  173.58    6.20
  -2  10  -8  175.28    6.20
   2  10   8  177.08    6.10
   3 -10   8   32.70    2.60
  -3 -10  -8   28.90    2.70
  -3  10  -8   28.70    2.70
   3  10   8   31.20    2.70
   4 -10   8   79.09    3.40
  -4 -10  -8   71.59    3.50
  -4  10  -8   70.09    3.70
   4  10   8   72.79    3.50
   5 -10   8   52.59    2.90
  -5 -10  -8   50.19    2.90
  -5  10  -8   42.50    3.60
   5  10   8   50.99    2.70
  -6 -10  -8   38.80    2.90
   6 -10   8   35.00    2.90
   6  10   8   36.00    2.30
  -6 -11   8   10.20    1.50
  -6 -11   8   11.80    2.20
  -6  11   8   13.00    1.50
   6  11  -8   13.10    1.70
  -5 -11   8   11.30    1.60
  -5 -11   8   13.90    2.30
   5  11  -8   14.90    1.80
  -5  11   8   12.30    1.50
   4  11  -8  228.38    6.50
  -4  11   8  231.78    6.30
   4  11  -8  204.28    7.50
  -3 -11   8    0.80    1.40
   3  11  -8    2.90    1.30
   3  11  -8   -2.00    2.10
  -3  11   8    1.90    1.00
  -2 -11   8    3.30    1.40
   2  11  -8    5.50    1.40
  -2  11   8    2.10    1.80
   2  11  -8    4.40    1.80
  -2  11   8    2.70    1.10
  -1 -11   8    7.60    1.50
  -1  11   8    6.20    1.20
   1  11  -8    9.10    1.80
   1  11  -8    6.80    1.70
  -1  11   8    6.60    1.80
   0 -11  -8   26.50    3.00
   0 -11   8   29.90    2.60
   0  11  -8   24.40    2.70
   0  11   8   23.50    2.10
  -1 -11  -8   43.60    3.00
   1 -11   8   48.10    3.00
   1  11   8   50.99    3.10
  -1  11  -8   47.00    3.00
   1  11   8   45.90    2.70
   2 -11   8  151.48    5.10
  -2 -11  -8  141.59    5.00
   2  11   8  148.39    4.90
  -3 -11  -8    4.60    1.40
   3 -11   8    5.00    1.40
  -3  11  -8    3.90    1.70
   3  11   8    3.20    1.30
   4 -11   8   20.30    2.50
  -4 -11  -8   22.90    2.70
  -4  11  -8   27.10    3.10
   4  11   8   25.10    2.00
  -2 -12   8    7.60    1.50
   2 -12  -8    4.00    1.50
  -2  12   8    5.40    1.00
   2  12  -8    7.70    2.10
   1 -12  -8  102.59    3.90
  -1 -12   8   99.69    3.90
  -1  12   8   98.39    3.40
   1  12  -8  102.19    4.10
   0 -12   8   22.80    2.60
   0 -12  -8   25.30    2.40
   0  12   8   25.70    2.10
   0  12  -8   21.40    2.60
 -13   0   9  222.58    6.60
 -13   0   9  224.08    6.30
 -12   0   9   -0.30    1.30
 -12   0   9   -0.50    1.30
 -11   0   9    4.10    2.30
 -11   0   9    6.70    2.00
 -10   0   9   -0.90    2.10
 -10   0   9    1.50    1.80
  -9   0   9  419.06   12.00
  -9   0   9  403.26   12.60
  -8   0   9    1.10    2.60
  -8   0   9    2.40    2.30
  -7   0   9 1570.54   37.30
  -7   0   9 1663.83   38.40
  -7   0   9 1602.74   38.90
  -6   0   9   -3.20    2.70
  -6   0   9   -1.50    2.20
  -6   0   9   -2.30    7.50
   5   0  -9  528.25   15.90
  -5   0   9  559.04   15.40
  -5   0   9  576.94   14.30
  -4   0   9    1.80    2.20
   4   0  -9   -2.70    2.60
   4   0  -9    0.00    2.40
   3   0  -9  782.22   21.80
  -3   0   9  798.92   19.70
   2   0  -9    0.30    2.20
  -2   0   9    3.10    1.70
  -1   0   9 1316.07   30.80
   1   0  -9 1277.97   33.00
   0   0   9    0.20    1.50
   0   0  -9   -1.30    2.10
  -1   0  -9  234.48    9.40
   1   0   9  239.88    7.60
  -1   0  -9  232.58    8.10
  -2   0  -9    7.00    2.40
   2   0   9    0.40    3.10
   2   0   9   10.20    2.60
   3   0   9  448.06   12.30
   3   0   9  431.46   13.20
  -3   0  -9  452.55   12.30
  -4   0  -9    1.70    1.90
   4   0   9   -0.60    3.00
   4   0   9    0.50    1.80
   5   0   9  252.37    9.70
  -5   0  -9  249.88    8.30
   5   0   9  243.68    8.40
   6   0   9    4.30    3.80
   6   0   9    1.00    2.00
  -6   0  -9    0.00    1.70
  -7   0  -9 1935.21   46.30
   7   0   9 1989.10   46.30
  -8   0  -9   -0.70    1.40
   8   0   9   -0.30    1.60
   9   0   9   45.60    3.50
  -9   0  -9   52.39    3.20
 -10   0  -9    2.10    1.30
 -11   0  -9   63.29    3.10
 -13  -1   9   42.70    2.50
 -13  -1   9   39.90    2.30
 -13   1   9   41.60    2.30
 -13   1   9   44.70    2.50
 -12  -1   9    1.10    1.30
 -12  -1   9    0.90    1.20
 -12   1   9   -2.00    1.40
 -12   1   9    1.90    1.40
 -11  -1   9   13.30    2.40
 -11  -1   9    8.30    2.70
 -11   1   9   12.10    4.00
 -10  -1   9   14.00    2.70
 -10  -1   9   15.40    2.50
 -10   1   9   14.30    2.50
 -10   1   9   16.50    2.70
  -9  -1   9   34.20    4.80
  -9  -1   9   36.90    3.90
  -9   1   9   32.00    4.50
  -9   1   9   37.00    4.10
  -8  -1   9  728.13   19.10
  -8  -1   9  741.33   19.80
  -8   1   9  730.33   18.90
  -8   1   9  718.93   19.40
  -7  -1   9   48.20    4.60
  -7  -1   9   43.00    4.20
  -7  -1   9   49.50    5.70
  -7   1   9   48.80    5.10
  -7   1   9   39.20    5.60
  -7   1   9   43.80    4.20
  -6  -1   9  558.64   14.40
  -6  -1   9  578.74   15.60
  -6  -1   9  551.24   16.40
  -6   1   9  563.74   15.40
  -6   1   9  571.04   14.60
  -5  -1   9  226.98    7.20
  -5  -1   9  224.08    8.40
   5  -1  -9  226.88   10.80
  -5   1   9  221.38    9.50
  -5   1   9  214.58    7.30
  -4  -1   9  251.87    9.60
  -4  -1   9  242.68    7.60
   4  -1  -9  240.78    9.80
  -4   1   9  252.77    8.30
  -4   1   9  255.47    7.90
   4   1  -9  232.68    8.70
  -3  -1   9  607.14   15.90
   3  -1  -9  611.74   17.90
   3   1  -9  609.74   17.80
  -3   1   9  619.54   15.90
  -2  -1   9    2.80    1.60
   2  -1  -9    3.60    2.20
   2   1  -9    3.80    2.20
  -2   1   9    4.60    1.90
   1  -1  -9  260.47   10.00
  -1  -1   9  276.27    8.30
   1   1  -9  262.17    9.80
  -1   1   9  264.37    8.20
   0  -1   9  372.36   10.60
   0  -1  -9  362.96   12.70
   0  -1  -9  394.26   10.80
   0   1  -9  374.76   12.50
   0   1   9  381.96   10.60
  -1  -1  -9  569.54   14.60
   1  -1   9  557.14   14.60
   1   1   9  569.34   14.70
  -1   1  -9  543.55   16.70
   1   1   9  547.15   17.30
  -2  -1  -9   54.49    3.80
   2  -1   9   40.30    5.80
  -2   1  -9   50.89    5.20
   2   1   9   43.90    5.30
   3  -1   9   63.19    4.00
   3  -1   9   64.19    6.00
  -3  -1  -9   64.39    4.10
   3   1   9   67.99    5.40
   3   1   9   67.19    4.10
  -3   1  -9   62.69    4.70
   4  -1   9   19.80    3.80
   4  -1   9   18.80    3.10
  -4  -1  -9   22.50    3.30
   4   1   9   15.90    2.40
   4   1   9   21.20    3.10
  -4   1  -9   18.10    2.60
  -5  -1  -9  530.95   14.50
   5  -1   9  527.35   14.40
   5  -1   9  520.45   15.50
  -5   1  -9  529.15   14.40
   5   1   9  517.25   15.00
   5   1   9  532.35   14.50
   6  -1   9   31.70    3.80
  -6  -1  -9   31.60    3.60
   6   1   9   37.20    5.80
  -6   1  -9   32.50    3.70
   6   1   9   29.50    3.80
   7  -1   9  460.65   13.20
  -7  -1  -9  462.55   13.30
   7   1   9  447.66   13.10
  -7   1  -9  469.25   13.20
   7   1   9  443.56   14.60
  -8  -1  -9    4.80    1.60
   8  -1   9    4.40    1.80
  -8   1  -9    5.80    1.60
   8   1   9    2.70    1.70
  -9  -1  -9  217.68    7.20
   9  -1   9  226.18    7.20
   9   1   9  225.58    7.20
  -9   1  -9  224.08    7.30
 -10  -1  -9   10.70    1.50
  10  -1   9   12.40    2.40
  10   1   9   13.10    1.90
 -10   1  -9    9.50    1.60
 -11  -1  -9   56.19    2.90
 -11   1  -9   54.49    2.90
  11   1   9   52.49    4.40
 -13  -2   9  101.19    3.50
 -13  -2   9   98.79    3.70
 -13   2   9  104.89    3.70
 -13   2   9   98.49    3.50
 -12  -2   9    3.70    1.40
 -12  -2   9    4.40    1.30
 -12   2   9    3.70    1.30
 -12   2   9    4.80    1.60
 -11  -2   9  176.38    6.60
 -11   2   9  164.38    6.10
 -11   2   9  174.48    5.70
 -10  -2   9   24.80    3.00
 -10  -2   9   26.10    4.20
 -10   2   9   21.10    2.80
 -10   2   9   18.60    2.80
  -9  -2   9 1453.45   35.60
  -9  -2   9 1484.35   36.30
  -9   2   9 1492.25   35.20
  -9   2   9 1496.05   35.90
  -8  -2   9 1239.08   30.50
  -8   2   9 1196.58   28.70
  -8   2   9 1212.08   30.00
  -8   2   9 1206.28   29.30
  -7  -2   9 1915.11   44.70
  -7  -2   9 2013.70   46.80
  -7   2   9 1944.61   46.20
  -7   2   9 1980.60   45.10
  -7   2   9 1929.11   45.70
  -6  -2   9    6.60    3.60
  -6  -2   9    7.90    2.70
  -6  -2   9   11.70    2.20
  -6   2   9    6.30    4.10
  -6   2   9   12.40    2.30
  -5  -2   9  328.47   10.60
  -5  -2   9  324.47    9.20
  -5   2   9  335.07    9.60
  -4  -2   9   47.70    3.60
  -4  -2   9   50.39    5.40
   4  -2  -9   39.90    6.00
  -4   2   9   42.80    4.00
  -3  -2   9  457.25   12.20
  -3  -2   9  425.16   11.50
   3  -2  -9  434.36   14.30
  -3  -2   9  437.66   13.10
  -3   2   9  445.36   12.40
  -3   2   9  428.86   11.90
   2  -2  -9   86.49    6.20
  -2  -2   9   94.59    4.50
  -2   2   9   91.39    4.90
   2   2  -9   82.09    6.90
   1  -2  -9   38.60    5.20
  -1  -2   9   42.10    3.50
  -1   2   9   42.50    3.90
   1   2  -9   44.80    4.80
   0  -2   9 2552.14   59.89
   0  -2  -9 2731.53   86.19
   0  -2  -9 2256.17   59.59
   0   2   9 2581.54   59.79
   0   2  -9 2870.31   69.39
   0   2   9 2705.33   64.19
   1  -2   9  389.16   10.90
  -1  -2  -9  390.16   10.70
   1  -2   9  372.06   11.80
   1   2   9  373.86   11.60
   1   2   9  381.06   10.80
   2  -2   9  181.08    6.80
   2  -2   9  177.08    8.10
  -2  -2  -9  186.38    6.60
   2  -2   9  192.58    6.60
   2   2   9  179.58    7.50
   2   2   9  185.58    6.70
  -3  -2  -9  802.12   19.90
   3  -2   9  738.23   19.40
   3  -2   9  759.42   20.60
   3  -2   9  797.92   19.90
   3   2   9  793.02   20.50
   3   2   9  821.32   20.00
  -3   2  -9  808.42   20.00
  -4  -2  -9   65.19    4.20
   4  -2   9   61.19    6.80
   4  -2   9   63.89    4.30
   4   2   9   67.09    5.00
   4   2   9   64.89    4.20
  -4   2  -9   60.79    4.60
   5  -2   9   27.50    3.60
  -5  -2  -9   33.70    3.50
   5   2   9   31.40    3.90
  -5   2  -9   30.10    3.80
  -6  -2  -9    4.10    1.90
   6  -2   9    7.40    2.30
  -6   2  -9    5.70    2.20
   6   2   9    6.90    2.30
   6   2   9    6.90    2.80
   7  -2   9  347.67   13.00
  -7  -2  -9  355.56   11.40
  -7   2  -9  351.56   13.60
   7   2   9  333.47   10.90
   7   2   9  343.27   11.20
   8  -2   9  160.48    6.10
  -8  -2  -9  159.08    6.00
   8   2   9  158.28    6.00
  -8   2  -9  166.88    6.00
   9  -2   9  188.98    6.60
  -9  -2  -9  191.18    6.50
   9   2   9  194.48    6.50
  -9   2  -9  188.18    6.40
 -10  -2  -9    1.10    1.40
 -10   2  -9    1.80    2.10
  10   2   9    0.90    1.70
 -11   2  -9   21.30    2.60
  11   2   9   25.20    3.10
 -13  -3   9  272.97    7.40
 -13  -3   9  287.97    7.70
 -12  -3   9  343.97    9.30
 -12  -3   9  349.37    9.70
 -12   3   9  327.17    8.90
 -12   3   9  349.57    9.50
 -11  -3   9   30.70    2.50
 -11  -3   9   28.10    2.90
 -11   3   9   23.30    3.20
 -11   3   9   27.60    2.70
 -10  -3   9  177.78    6.80
 -10  -3   9  189.08    7.60
 -10   3   9  178.58    7.00
 -10   3   9  179.78    6.90
  -9  -3   9  375.16   12.00
  -9  -3   9  376.56   11.30
  -9   3   9  365.16   11.10
  -9   3   9  379.36   11.40
  -8  -3   9  130.99    6.20
  -8  -3   9  134.49    7.00
  -8   3   9  134.19    5.70
  -8   3   9  137.89    6.60
  -7  -3   9   57.89    4.80
  -7  -3   9   59.89    4.30
  -7  -3   9   53.09    4.80
  -7   3   9   47.10    5.30
  -6  -3   9 2135.59   51.49
  -6  -3   9 2237.88   50.99
  -6  -3   9 2121.69   50.39
  -6  -3   9 2155.38   49.40
  -6   3   9 2267.57   49.99
  -6   3   9 2110.29   50.79
  -5  -3   9  370.76   11.20
  -5  -3   9  332.47   14.10
  -5  -3   9  352.36    9.70
  -5   3   9  368.26   10.20
  -4  -3   9   62.09    5.40
  -4  -3   9   58.89    3.70
  -4   3   9   56.59    4.10
  -3  -3   9   77.99    4.00
  -3   3   9   78.19    4.70
  -2  -3   9  240.28    7.00
  -2   3   9  212.48   10.90
  -2   3   9  230.98    7.50
  -2   3   9  208.38   11.00
  -1  -3   9   71.49    4.00
  -1   3   9   70.39    5.60
  -1   3   9   67.09    4.70
  -1   3   9   74.39    4.90
   0  -3   9    1.20    2.00
   0  -3  -9    4.00   11.20
   0   3   9    7.70    2.30
   0   3   9   -0.40    2.30
   0   3   9    1.30    2.70
  -1  -3  -9  678.83   19.70
   1  -3   9  729.43   17.90
   1  -3   9  681.23   18.50
   1  -3   9  717.93   17.20
  -1  -3  -9  680.03   43.20
   1   3   9  715.83   17.80
   1   3   9  689.63   18.40
   1   3   9  671.73   17.60
   2  -3   9  745.53   19.70
   2  -3   9  745.63   18.90
  -2  -3  -9  762.42   18.80
   2  -3   9  728.83   18.10
   2   3   9  717.83   19.30
   2   3   9  752.52   18.80
   2   3   9  722.73   18.90
  -3  -3  -9  214.38    7.40
   3  -3   9  221.48    7.40
   3  -3   9  213.68    9.10
   3   3   9  206.28    8.00
   3   3   9  214.48    7.50
   4  -3   9  719.33   18.50
  -4  -3  -9  725.23   18.50
   4   3   9  702.43   18.50
   4   3   9  711.83   18.90
  -4   3  -9  693.53   18.40
  -5  -3  -9  800.12   20.50
   5  -3   9  794.12   20.30
   5   3   9  785.32   20.70
  -5   3  -9  786.92   20.20
  -6  -3  -9   30.60    3.80
   6  -3   9   30.40    4.20
  -6   3  -9   28.40    4.00
  -6   3  -9   33.50    5.40
   6   3   9   25.80    3.30
   7  -3   9  480.55   13.30
  -7  -3  -9  484.85   13.70
   7   3   9  483.85   13.90
   7   3   9  503.75   13.60
  -7   3  -9  485.45   13.40
   8  -3   9    6.60    2.40
  -8  -3  -9    1.90    1.40
   8   3   9    1.20    1.60
  -8   3  -9   -0.10    1.60
   8   3   9    2.70    2.70
  -9  -3  -9   86.89    4.10
  -9   3  -9   83.59    4.00
   9   3   9   92.39    4.10
 -10  -3  -9    9.50    2.20
 -10   3  -9   14.60    2.50
  10   3   9   16.80    2.60
 -12  -4   9   98.39    3.70
 -12  -4   9   97.99    4.00
  12   4  -9   95.99    5.00
 -12   4   9  108.69    3.90
 -11  -4   9  129.29    4.70
 -11  -4   9  129.39    5.10
 -11   4   9  134.39    4.90
 -10  -4   9   77.49    4.60
 -10  -4   9   79.89    5.30
 -10   4   9   77.19    4.90
  -9  -4   9   54.99    4.90
  -9  -4   9   44.40    4.10
  -9   4   9   37.30    4.10
  -9   4   9   49.40    4.40
  -8  -4   9  104.39    5.60
  -8  -4   9  107.49    6.00
  -8  -4   9  111.89    6.40
  -8   4   9  107.79    5.80
  -8   4   9  113.99    5.10
  -7  -4   9 2016.80   48.60
  -7  -4   9 2042.70   47.90
  -7  -4   9 2032.90   46.40
  -7  -4   9 2046.00   47.80
  -7   4   9 2055.89   47.00
  -7   4   9 2001.40   47.80
  -6  -4   9   10.30    3.60
  -6  -4   9   10.40    2.60
  -6  -4   9   11.20    2.20
  -6  -4   9    8.90    2.60
  -6   4   9   10.40    3.30
  -5  -4   9  165.58    6.90
  -5  -4   9  156.08    6.90
  -5  -4   9  159.28    8.90
  -5  -4   9  158.18    5.50
   5   4  -9  145.99    7.10
  -5   4   9  164.58    6.20
  -4  -4   9  467.55   13.50
  -4  -4   9  497.85   12.50
  -4  -4   9  484.35   13.90
  -4   4   9  483.55   13.00
  -3  -4   9  295.67    8.50
  -3  -4   9  312.47   10.10
  -3  -4   9  307.87    9.70
  -3   4   9  304.57    9.10
  -3   4   9  295.07   11.00
  -2  -4   9   28.80    4.80
  -2  -4   9   36.00    3.10
  -2   4   9   34.40    3.80
  -2   4   9   34.00    5.50
  -1  -4   9  683.93   16.90
  -1  -4   9  688.13   17.60
  -1  -4   9  705.73   17.80
  -1   4   9  669.13   18.20
  -1   4   9  681.93   17.30
   0  -4   9  973.50   22.80
   0  -4   9  988.80   23.70
   0   4   9  968.70   23.60
   0   4   9  930.11   24.10
   0   4   9  910.01   23.10
  -1  -4  -9  209.18    8.30
   1  -4   9  236.88    7.80
   1  -4   9  240.88    7.20
   1   4   9  221.78    7.70
   1   4   9  238.78    8.00
   1   4   9  228.78    8.50
  -2  -4  -9    7.60    2.10
   2  -4   9    8.00    2.10
   2  -4   9    7.40    2.10
   2   4   9   13.50    3.30
   2   4   9    7.20    2.70
   2   4   9    6.20    2.20
   3  -4   9  867.41   22.20
  -3  -4  -9  903.01   22.30
   3  -4   9  872.41   21.50
   3   4   9  902.11   22.20
   3   4   9  855.81   22.50
   4  -4   9   -1.60    2.10
   4  -4   9    1.80    2.40
  -4  -4  -9    0.20    1.80
   4  -4   9    3.40    2.70
   4   4   9    0.30    1.80
   4   4   9    1.70    2.20
  -4   4  -9    0.60    2.10
   5  -4   9  148.39    6.50
  -5  -4  -9  149.88    6.30
   5  -4   9  143.89    5.90
  -5   4  -9  142.59    6.60
  -5   4  -9  146.49    6.90
   5   4   9  139.59    6.60
   5   4   9  149.29    6.40
  -6  -4  -9  159.78    6.60
   6  -4   9  148.49    7.00
   6  -4   9  157.88    6.50
  -6   4  -9  159.88    7.00
   6   4   9  157.58    6.90
  -6   4  -9  155.68    7.30
  -7  -4  -9    5.10    1.50
   7  -4   9   -2.90    2.60
   7   4   9    2.10    1.70
   7   4   9    2.80    2.30
  -7   4  -9    1.50    1.80
  -8  -4  -9   72.79    3.80
   8   4   9   73.99    4.30
   8   4   9   80.69    4.70
  -8   4  -9   71.69    3.80
  -9  -4  -9    4.90    1.40
  -9   4  -9    5.40    1.60
   9   4   9    4.00    1.50
 -10  -4  -9   37.10    2.50
  10   4   9   36.90    2.80
 -10   4  -9   31.60    3.00
 -12  -5   9  258.07    7.30
 -12  -5   9  257.57    6.90
 -12   5   9  262.57    7.00
  12   5  -9  241.48    7.50
 -11  -5   9   53.59    3.20
 -11  -5   9   59.49    2.90
 -11   5   9   56.49    2.90
 -10  -5   9    0.40    1.60
 -10  -5   9    1.90    1.40
 -10   5   9    4.50    1.50
  -9  -5   9  148.09    6.90
  -9  -5   9  142.39    6.00
  -9   5   9  151.78    6.40
  -9   5   9  141.49    6.20
  -8  -5   9 1318.77   31.00
  -8  -5   9 1257.17   31.70
  -8  -5   9 1263.17   30.80
  -8   5   9 1222.48   30.70
  -8   5   9 1266.17   29.90
  -7  -5   9  281.07    9.40
  -7  -5   9  290.07    9.60
  -7  -5   9  279.87    8.30
  -7  -5   9  281.57   10.40
  -7   5   9  278.67    9.40
  -7   5   9  287.47    8.70
  -6  -5   9    6.70    3.30
  -6  -5   9    7.90    2.60
  -6  -5   9    3.80    1.90
  -6  -5   9    8.50    2.50
  -6   5   9    9.00    2.20
  -6   5   9    6.50    3.10
  -5  -5   9  304.77    9.80
  -5  -5   9  292.07    9.80
   5   5  -9  294.67   10.00
  -5   5   9  292.07    9.10
  -4  -5   9 1309.57   32.10
  -4  -5   9 1340.07   30.60
  -4  -5   9 1311.67   31.70
   4   5  -9 1294.87   31.70
  -4   5   9 1305.27   31.20
  -3  -5   9  332.17   10.50
  -3  -5   9  320.97   10.00
  -3  -5   9  338.97    9.10
  -3   5   9  323.87    9.60
  -3   5   9  315.77   11.40
   3   5  -9  325.47   10.10
  -2  -5   9   14.00    2.60
  -2  -5   9   22.90    2.80
  -2   5   9   19.70    3.40
  -2   5   9   24.00    2.70
   2   5  -9   14.80    2.30
  -1  -5   9   13.60    2.70
  -1  -5   9   13.80    1.90
  -1   5   9   10.60    3.10
  -1   5   9   13.40    2.30
   0  -5   9   44.10    3.80
   0  -5   9   32.90    4.20
   0  -5   9   44.10    3.30
   0   5   9   40.40    4.00
   0   5   9   42.90    5.00
   1  -5   9  458.45   12.60
   1  -5   9  459.05   13.00
   1  -5   9  476.55   12.20
   1   5   9  461.05   13.50
   1   5   9  472.15   13.20
   1   5   9  457.65   12.60
   2  -5   9  418.06   12.40
   2  -5   9  435.86   12.00
  -2  -5  -9  442.66   12.70
   2  -5   9  454.05   11.60
   2   5   9  429.06   13.10
  -2   5  -9  439.16   12.60
   2   5   9  442.96   12.50
   2   5   9  421.16   12.30
   3  -5   9   37.10    4.20
  -3  -5  -9   33.80    3.70
   3  -5   9   26.30    3.60
   3  -5   9   41.10    3.80
   3   5   9   35.10    4.30
  -3   5  -9   41.50    4.00
   3   5   9   44.40    4.40
   4  -5   9  467.45   12.50
  -4  -5  -9  471.05   13.30
   4  -5   9  446.06   13.10
  -4   5  -9  465.75   13.20
   4   5   9  455.25   13.40
   5  -5   9    7.60    3.20
   5  -5   9    0.50    2.10
  -5  -5  -9    0.90    1.90
   5   5   9    2.30    2.10
  -5   5  -9    5.10    2.60
   5   5   9   -0.20    2.20
  -6  -5  -9  342.47   10.40
   6  -5   9  327.37    9.50
   6   5   9  350.96   10.80
  -6   5  -9  344.97   10.20
  -6   5  -9  351.26   10.20
   7  -5   9  479.95   12.50
  -7  -5  -9  474.65   13.40
   7   5   9  483.35   13.30
  -7   5  -9  492.95   13.10
   7   5   9  499.55   13.80
  -8  -5  -9  182.98    6.30
   8   5   9  181.78    6.20
   8   5   9  183.58    6.10
  -8   5  -9  183.38    6.30
  -9  -5  -9    0.80    1.30
  -9   5  -9    3.50    2.00
   9   5   9    6.80    3.30
   9   5   9    3.70    1.40
  10   5   9   23.70    2.60
 -11  -6   9  127.69    4.20
 -11  -6   9  126.99    4.50
 -11   6   9  126.29    4.30
 -10  -6   9  194.78    6.00
 -10  -6   9  185.18    6.50
 -10   6   9  190.18    6.00
  10   6  -9  190.58    6.00
  -9  -6   9  256.47    8.60
  -9  -6   9  278.37    8.80
  -9   6   9  267.67    8.00
  -9   6   9  256.17    7.30
  -8  -6   9   94.49    4.70
  -8  -6   9   99.59    5.10
  -8  -6   9   97.99    5.90
  -8   6   9   96.29    5.40
  -8   6   9  100.69    4.80
  -7  -6   9  212.58    7.70
  -7  -6   9  215.38    8.70
  -7  -6   9  208.48    7.30
  -7   6   9  211.18    7.10
  -7   6   9  207.88    7.80
  -6  -6   9  786.82   20.70
  -6  -6   9  817.62   20.70
  -6  -6   9  795.02   19.10
  -6  -6   9  782.72   21.40
  -6   6   9  787.42   20.40
  -6   6   9  778.62   19.80
  -5  -6   9   49.00    4.70
  -5  -6   9   56.29    4.80
  -5  -6   9   52.19    3.60
  -5   6   9   52.49    4.00
   5   6  -9   48.10    5.60
  -4  -6   9  731.63   19.60
  -4  -6   9  775.62   18.40
  -4  -6   9  751.72   19.80
  -4   6   9  743.23   18.90
   4   6  -9  750.12   19.50
  -3  -6   9 2602.94   60.69
  -3  -6   9 2623.14   60.99
  -3  -6   9 2641.24   59.59
  -3   6   9 2630.14   61.49
   3   6  -9 2597.64   60.79
  -3   6   9 2672.23   60.19
  -2  -6   9  671.43   17.20
  -2  -6   9  655.93   16.70
  -2   6   9  668.93   18.00
   2   6  -9  675.63   17.50
  -2   6   9  591.14   17.70
  -2   6   9  644.24   17.70
  -1  -6   9  599.64   15.80
  -1   6   9  610.14   16.60
   1   6  -9  591.74   16.10
  -1   6   9  570.04   16.60
   0  -6   9 1244.58   30.10
   0  -6   9 1245.18   29.50
   0   6  -9 1268.57   30.70
   1  -6   9   39.10    3.30
   1  -6   9   42.40    3.90
   1   6   9   41.10    4.80
  -1   6  -9   39.60    4.10
   1   6   9   49.20    7.10
   2  -6   9   37.80    3.30
   2  -6   9   37.30    4.00
   2  -6   9   41.70    4.40
  -2  -6  -9   39.10    4.60
   2   6   9   43.70    4.90
   2   6   9   37.30    4.40
   2   6   9   43.80    5.20
  -2   6  -9   36.10    3.90
  -3  -6  -9   71.39    4.70
   3  -6   9   80.89    5.50
   3  -6   9   78.49    4.50
   3   6   9   74.99    5.40
   3   6   9   70.69    5.00
  -3   6  -9   73.89    4.90
  -4  -6  -9  282.87    9.40
   4  -6   9  282.57    8.80
   4  -6   9  277.57    9.90
   4   6   9  280.97    9.50
  -4   6  -9  287.27    9.40
   4   6   9  278.67    9.50
  -5  -6  -9  143.39    5.70
   5  -6   9  136.69    5.10
  -5   6  -9  144.39    5.70
   5   6   9  143.29    6.60
   5   6   9  152.98    5.80
  -6  -6  -9    8.40    1.60
   6  -6   9   11.40    1.70
  -6   6  -9   11.50    2.40
   6   6   9   14.20    2.70
   6   6   9    8.20    1.80
   7  -6   9   80.79    3.80
  -7  -6  -9   74.09    3.90
   7   6   9   77.39    3.90
   7   6   9   78.89    4.00
  -8  -6  -9    7.70    1.40
   8  -6   9    5.60    2.40
   8   6   9    3.90    1.40
   8   6   9    8.00    1.60
  -9  -6  -9    3.50    1.40
   9   6   9    1.00    1.60
   9   6   9    0.30    1.90
 -11   7   9   23.10    2.20
 -10  -7   9   15.20    2.10
 -10  -7   9   14.10    2.20
  10   7  -9   15.20    2.40
  -9  -7   9   20.10    2.40
  -9  -7   9   23.10    2.80
  -9   7   9   26.60    2.40
  -8  -7   9  247.58    7.80
  -8  -7   9  243.78    8.10
  -8  -7   9  239.18    7.50
  -8   7   9  236.48    6.90
  -8   7   9  239.28    7.40
  -7  -7   9  181.48    6.60
  -7  -7   9  199.08    7.10
  -7  -7   9  189.78    8.00
  -7   7   9  184.18    6.40
  -7   7   9  177.48    7.20
  -6  -7   9  167.88    7.60
  -6  -7   9  157.68    6.10
  -6  -7   9  162.58    6.80
  -6   7   9  163.78    6.00
  -6   7   9  149.99    7.30
  -5  -7   9   61.19    3.40
  -5  -7   9   50.09    4.50
  -5  -7   9   54.69    4.80
  -5   7   9   52.39    3.80
  -5   7   9   44.90    4.40
   5   7  -9   54.79    7.40
  -4  -7   9  433.86   11.10
  -4  -7   9  417.56   12.50
  -4  -7   9  414.66   12.40
  -4   7   9  420.56   13.00
   4   7  -9  409.96   12.40
  -4   7   9  408.16   11.70
  -3  -7   9  688.13   18.10
  -3  -7   9  676.83   18.20
  -3  -7   9  668.83   16.80
  -3   7   9  688.03   18.80
  -3   7   9  678.93   17.40
   3   7  -9  681.23   18.20
  -2  -7   9  172.78    6.90
  -2  -7   9  170.48    5.80
  -2  -7   9  170.58    7.00
  -2   7   9  167.28    7.70
   2   7  -9  173.28    7.00
  -2   7   9  169.28    7.60
  -2   7   9  169.28    6.30
  -1  -7   9  201.28    6.40
  -1  -7   9  207.08    7.40
  -1   7   9  195.68    6.90
  -1   7   9  195.28    8.20
   1   7  -9  204.28    7.70
  -1   7   9  194.78    8.20
   0  -7   9  111.59    5.40
   0  -7   9  113.29    4.60
   0   7  -9  107.49    5.50
   0   7   9  107.99    6.10
   0   7   9  115.19    6.30
   0   7   9  104.99    5.10
   1  -7   9    5.00    1.60
   1  -7   9    3.90    2.20
   1   7   9    1.30    2.30
  -1   7  -9    3.20    2.10
   1   7   9    9.70    2.30
  -2  -7  -9   58.29    5.30
   2  -7   9   54.79    4.30
  -2   7  -9   54.89    4.50
   2   7   9   55.19    5.00
   2   7   9   63.79    4.90
   3   7   9   36.60    4.20
   3   7   9   30.80    4.00
  -3   7  -9   20.70    4.90
  -4  -7  -9  252.97    8.30
   4  -7   9  259.17    7.70
   4   7   9  256.27    8.20
  -4   7  -9  244.78    8.10
   4   7   9  274.17    9.10
   5  -7   9   39.10    2.90
  -5  -7  -9   33.10    2.90
   5   7   9   38.60    3.50
   5   7   9   39.80    4.00
  -5   7  -9   39.90    3.40
  -6  -7  -9   88.29    4.10
   6  -7   9   82.39    3.80
   6   7   9   84.69    4.20
   6   7   9   88.09    4.20
  -6   7  -9   88.09    4.60
   7  -7   9   21.40    3.60
  -7  -7  -9   19.00    2.40
   7   7   9   19.60    2.50
   7   7   9   24.20    2.90
  -8  -7  -9    4.10    1.40
   8   7   9    2.00    1.30
   8   7   9   -0.30    1.70
 -10  -8   9   32.30    2.60
 -10   8   9   38.40    2.50
  10   8  -9   40.90    2.40
  -9  -8   9    9.10    1.60
  -9  -8   9    6.80    1.50
  -9   8   9   10.20    1.60
   9   8  -9    8.20    1.30
  -8  -8   9   72.79    3.80
  -8  -8   9   82.59    3.90
  -8  -8   9   79.79    3.50
  -8   8   9   77.09    3.70
  -8   8   9   76.89    3.10
  -7  -8   9    4.10    1.90
  -7  -8   9    3.30    1.60
  -7  -8   9    6.30    1.80
  -7   8   9    8.00    1.90
  -7   8   9    6.80    1.40
  -6  -8   9  210.38    7.20
  -6  -8   9  213.88    9.10
  -6  -8   9  216.98    7.70
  -6   8   9  207.38    7.40
  -6   8   9  221.38    7.10
  -5  -8   9  352.96   10.60
  -5  -8   9  326.37   10.10
  -5   8   9  345.17   10.00
  -5   8   9  362.06   10.70
   5   8  -9  337.87   10.30
  -4  -8   9    9.10    1.90
  -4  -8   9    6.80    2.60
  -4   8   9   10.20    2.10
   4   8  -9   10.80    2.20
  -3  -8   9  191.58    7.50
  -3  -8   9  195.78    6.80
   3   8  -9  192.28    7.00
  -3   8   9  198.78    6.80
  -3   8   9  181.78    7.30
  -2  -8   9    3.00    2.50
  -2   8   9    1.20    1.70
  -2   8   9   -1.90    3.20
  -2   8   9    1.00    4.10
  -1  -8   9    6.00    2.50
  -1  -8   9    4.10    2.90
  -1   8   9    5.70    2.90
   1   8  -9    3.70    2.60
  -1   8   9    4.70    1.80
  -1   8   9    4.80    3.00
   0   8   9  502.45   13.40
   0   8   9  501.45   14.30
  -1  -8  -9  350.36   10.70
   1  -8   9  292.57    9.10
   1   8   9  301.27   10.10
  -1   8  -9  301.17    9.60
   1   8   9  300.37    9.10
  -2  -8  -9  246.78    8.30
   2  -8   9  237.78    7.50
  -2   8  -9  243.68    8.00
   2   8   9  238.88    8.00
   2   8   9  251.57    8.70
   3  -8   9   10.20    1.80
  -3  -8  -9    6.40    1.70
   3   8   9   10.50    2.60
  -3   8  -9   10.20    1.80
  -4  -8  -9   -0.10    1.40
   4  -8   9    1.10    1.60
   4   8   9    2.10    2.10
  -4   8  -9    2.20    1.70
  -5  -8  -9  204.48    6.80
   5  -8   9  201.58    6.40
  -5   8  -9  214.98    6.80
   5   8   9  202.08    7.00
   5   8   9  213.08    7.00
  -6  -8  -9   79.39    3.70
   6   8   9   83.79    3.70
  -6   8  -9   65.89    6.40
   6   8   9   80.79    4.20
   7  -8   9    1.10    1.90
  -7  -8  -9    5.10    1.40
   7   8   9    2.40    1.30
   7   8   9    2.50    1.90
  -9  -9   9   11.50    2.10
   9   9  -9   14.50    1.90
  -8  -9   9  171.18    5.30
  -8  -9   9  170.78    5.60
  -8  -9   9  169.78    5.60
  -8   9   9  170.88    4.90
   8   9  -9  174.08    5.30
  -7  -9   9   76.69    3.80
  -7  -9   9   78.89    3.90
  -7  -9   9   79.89    3.60
  -7   9   9   77.99    3.60
  -7   9   9   79.69    3.10
  -6  -9   9   35.60    3.20
  -6  -9   9   35.10    3.10
  -6  -9   9   44.60    3.40
  -6   9   9   42.20    3.30
  -6   9   9   38.10    2.40
  -5  -9   9  297.77    8.80
  -5  -9   9  314.07    9.30
  -5   9   9  312.37    8.70
  -5   9   9  319.67    9.50
  -4  -9   9  245.98    8.00
  -4  -9   9  263.97    8.00
  -4   9   9  259.67    7.90
   4   9  -9  254.17    8.20
  -3  -9   9  164.18    5.90
  -3  -9   9  152.58    7.00
  -3   9   9  157.38    5.80
   3   9  -9  148.49    5.90
  -3   9   9  155.68    6.30
  -2  -9   9   47.80    4.70
  -2  -9   9   44.50    3.40
  -2   9   9   53.69    3.70
  -2   9   9   50.79    3.80
   2   9  -9   53.89    3.60
  -1  -9   9  103.39    5.70
  -1  -9   9  101.09    4.60
   1   9  -9  107.09    4.80
  -1   9   9   98.09    5.10
  -1   9   9  109.39    6.00
  -1   9   9  107.09    4.70
   0  -9   9   44.60    3.30
   0  -9   9   50.39    4.60
   0   9   9   49.90    4.90
   0   9   9   50.99    3.70
   0   9  -9   53.39    3.40
   1  -9   9    1.10    1.60
   1   9   9    3.00    2.20
  -1   9  -9    3.70    1.60
  -2  -9  -9  165.48    6.10
   2  -9   9  164.28    5.70
  -2   9  -9  169.28    6.10
   3  -9   9    2.10    1.50
  -3  -9  -9   -1.50    1.30
  -3   9  -9    0.50    1.60
   3   9   9    3.80    1.50
  -4  -9  -9  279.37    8.40
   4  -9   9  289.97    8.20
  -4   9  -9  287.17    8.50
   4   9   9  283.97    8.50
  -5  -9  -9   11.50    1.60
   5  -9   9   13.20    1.80
  -5   9  -9   12.50    2.20
   5   9   9   15.90    2.20
   6  -9   9    8.10    1.80
   6   9   9   12.70    2.00
  -7 -10   9    0.70    1.60
   7  10  -9    3.20    1.00
  -7  10   9    2.20    0.90
  -6 -10   9   10.40    1.70
  -6 -10   9   11.60    1.70
  -6  10   9   15.50    1.60
  -5 -10   9   32.70    2.90
  -5 -10   9   21.70    2.80
  -5  10   9   28.00    2.00
  -4 -10   9   84.19    5.10
  -4 -10   9   76.39    3.90
  -4  10   9   81.19    3.30
  -3 -10   9   10.10    1.70
  -3 -10   9   10.40    2.40
   3  10  -9   12.20    2.00
  -3  10   9   10.60    1.40
  -2 -10   9   17.00    2.40
  -2 -10   9   15.50    1.90
   2  10  -9   17.80    2.70
  -2  10   9   13.60    2.00
  -1 -10   9   27.70    2.80
  -1 -10   9   28.20    3.40
   1  10  -9   25.10    2.80
  -1  10   9   29.40    2.30
   0 -10   9  229.38    7.20
   0 -10  -9  265.17    8.10
   0 -10   9  236.98    7.40
   0  10   9  241.28    7.20
   0  10   9  236.88    6.80
   0  10  -9  236.18    7.60
   1 -10   9   -0.60    2.00
  -1 -10  -9    0.60    1.40
   1 -10   9    4.30    1.50
   1  10   9    0.30    1.60
  -1  10  -9   -0.50    1.50
   1  10   9   -0.10    1.50
   2 -10   9  276.17    8.10
   2 -10   9  287.57    8.30
  -2 -10  -9  293.67    8.50
   2  10   9  293.87    8.40
  -2  10  -9  301.27    8.70
   3 -10   9   30.80    4.10
   3 -10   9   37.30    3.00
  -3 -10  -9   25.50    2.60
   3  10   9   31.40    2.50
  -3  10  -9   30.70    2.70
   4 -10   9   49.30    3.20
  -4 -10  -9   49.99    2.90
  -4  10  -9   42.10    3.20
   4  10   9   49.60    2.70
  -5 -10  -9  163.08    5.10
   5 -10   9  147.29    5.10
   5 -10   9  150.38    5.10
   5  10   9  173.78    5.10
  -5 -11   9   77.59    3.50
  -5 -11   9   67.09    3.50
  -5  11   9   78.99    2.70
   5  11  -9   75.19    2.90
  -4 -11   9  391.06   10.40
  -4 -11   9  378.06   10.10
  -4  11   9  392.16    9.80
   4  11  -9  398.96   10.00
  -3 -11   9   61.99    3.30
   3  11  -9   59.79    4.00
  -3  11   9   65.99    2.60
   3  11  -9   66.29    2.80
   2 -11  -9   83.59    4.60
  -2 -11   9   63.99    3.50
   2  11  -9   68.19    3.70
   2  11  -9   67.19    3.00
  -2  11   9   64.49    2.70
   1 -11  -9   54.49    5.00
  -1 -11   9   40.90    3.00
   1  11  -9   32.40    3.10
   1  11  -9   43.10    2.90
  -1  11   9   45.80    2.20
   0 -11   9   25.50    2.80
   0 -11  -9   22.90    2.50
   0  11  -9   27.40    2.50
   0  11   9   26.30    2.10
   1 -11   9   28.10    2.70
  -1 -11  -9   21.30    2.30
  -1  11  -9   27.70    2.50
   1  11   9   19.20    2.80
  -2 -11  -9   32.50    2.60
   2 -11   9   33.90    2.80
  -2  11  -9   38.10    2.70
  -3 -11  -9    9.90    1.40
   3 -11   9    9.60    1.80
   3  11   9    8.70    1.30
  -3  11  -9   10.80    1.80
 -13   0  10   -1.20    1.70
 -12   0  10   11.50    1.40
 -12   0  10   12.10    2.10
 -11   0  10    2.20    1.50
 -11   0  10    1.30    1.40
 -10   0  10   15.20    2.40
 -10   0  10   16.30    2.90
  -9   0  10   -1.20    2.10
  -9   0  10   -0.90    2.30
  -8   0  10   89.09    4.80
  -8   0  10   89.49    6.00
  -8   0  10   95.09    5.30
  -7   0  10   -1.90    3.50
  -7   0  10    0.30    2.40
  -6   0  10    4.30    2.00
  -6   0  10    6.60    2.70
  -5   0  10    2.20    2.80
  -5   0  10   -0.60    1.90
  -4   0  10  886.11   22.90
  -4   0  10  933.11   23.10
  -4   0  10  903.01   21.90
  -3   0  10    0.70    2.20
  -3   0  10    3.20    3.80
  -3   0  10    1.20    1.80
  -3   0  10   -1.60    2.70
  -2   0  10   11.00    2.20
  -2   0  10    8.50    2.10
  -2   0  10    6.40    2.70
  -1   0  10    3.40    2.20
  -1   0  10   -3.80    2.70
  -1   0  10    3.30    2.00
   0   0  10  202.48    8.00
   0   0  10  190.18    6.80
   0   0  10  198.48    6.90
   1   0  10   -0.10    2.60
   1   0  10    1.20    1.60
   1   0  10    5.60    2.50
   2   0  10  797.72   19.90
   2   0  10  777.62   20.30
  -2   0 -10  752.32   20.40
   2   0  10  798.62   19.40
  -3   0 -10   -1.60    2.20
   3   0  10    0.20    1.70
   3   0  10    1.70    2.60
   4   0  10  557.54   15.10
  -4   0 -10  554.64   15.00
   4   0  10  542.65   15.40
   5   0  10    0.00    1.90
   5   0  10   -0.60    2.90
  -5   0 -10    1.10    2.00
   6   0  10 1000.40   25.10
  -6   0 -10 1011.40   25.00
   6   0  10  975.40   25.20
   7   0  10    1.10    1.60
  -7   0 -10   -2.50    1.50
  -8   0 -10    9.50    1.70
   8   0  10    8.20    1.80
   9   0  10   -1.00    1.70
  -9   0 -10   -1.90    1.40
 -10   0 -10   50.29    2.90
  10   0  10   38.80    3.50
 -13  -1  10    0.10    1.20
 -13  -1  10    0.00    1.10
 -13   1  10    1.00    1.20
 -13   1  10   -0.20    1.30
 -12  -1  10   14.70    1.80
 -12  -1  10   17.60    2.30
 -12   1  10   14.90    2.30
 -12   1  10   21.00    2.30
 -11  -1  10    1.30    1.60
 -11  -1  10    4.90    1.40
 -11   1  10    4.00    1.50
 -11   1  10    0.70    1.60
 -10  -1  10   15.70    2.50
 -10  -1  10   23.40    4.30
 -10   1  10   19.80    3.10
 -10   1  10   21.20    2.80
  -9  -1  10   72.09    4.70
  -9  -1  10   71.79    5.30
  -9   1  10   77.29    4.90
  -9   1  10   66.49    5.10
  -8  -1  10  503.85   14.20
  -8  -1  10  517.95   14.80
  -8  -1  10  500.25   13.20
  -8   1  10  525.15   14.10
  -8   1  10  505.05   13.30
  -8   1  10  509.95   14.60
  -7  -1  10    1.30    2.20
  -7  -1  10    2.70    2.40
  -7   1  10    1.00    2.10
  -7   1  10   -0.10    2.90
  -7   1  10    2.00    5.70
  -6  -1  10   87.39    5.60
  -6  -1  10   95.59    4.50
  -6   1  10  104.79    4.70
  -6   1  10   87.29    5.90
  -5  -1  10  389.16   11.80
  -5  -1  10  388.46   10.50
  -5   1  10  370.86   12.00
  -5   1  10  396.66   10.80
  -4  -1  10   77.69    5.70
  -4  -1  10   80.39    4.20
  -4   1  10   81.69    6.80
  -4   1  10   75.89    4.50
  -4   1  10   76.09    6.30
  -3  -1  10  143.49    7.20
  -3  -1  10  139.29    5.30
  -3  -1  10  143.59    7.00
  -3  -1  10  145.19    5.90
  -3   1  10  132.99    7.00
  -3   1  10  149.88    5.70
  -3   1  10  148.79    6.20
  -2  -1  10 1042.80   25.90
  -2  -1  10 1043.40   26.30
  -2  -1  10 1058.09   25.10
  -2   1  10 1062.79   25.30
  -2   1  10 1058.39   26.40
  -2   1  10 1079.39   25.80
  -1  -1  10  278.27    8.60
  -1  -1  10  270.67    8.10
  -1  -1  10  268.27    9.40
  -1   1  10  260.27    8.50
  -1   1  10  273.17    9.30
  -1   1  10  267.07    8.30
   0  -1 -10 1349.47   33.70
   0  -1  10 1340.27   32.80
   0  -1  10 1361.26   32.50
   0  -1  10 1385.16   31.80
   0   1  10 1363.46   33.00
   0   1  10 1374.16   32.00
   0   1  10 1345.57   33.00
  -1  -1 -10   30.60    4.20
   1  -1  10   25.80    3.20
   1  -1  10   27.10    3.30
   1  -1  10   25.00    2.80
   1   1  10   26.70    3.10
   1   1  10   26.50    3.40
   1   1  10   22.50    3.20
   2  -1  10    0.80    2.50
  -2  -1 -10    0.90    2.00
   2  -1  10    2.60    1.70
   2  -1  10    1.90    2.60
   2   1  10    1.50    1.80
   2   1  10    2.70    2.50
   2   1  10    7.00    2.90
   3  -1  10   13.00    2.30
   3  -1  10   16.50    3.10
  -3  -1 -10   15.70    2.50
   3   1  10   12.30    2.80
   3   1  10   12.70    2.20
  -3   1 -10   13.60    2.90
   4  -1  10  553.24   15.00
   4  -1  10  532.25   15.40
  -4  -1 -10  547.65   14.80
  -4   1 -10  537.55   14.80
   4   1  10  547.15   15.00
   5  -1  10   49.60    6.10
   5  -1  10   53.39    4.40
  -5  -1 -10   56.59    4.30
  -5   1 -10   55.09    4.50
   5   1  10   55.99    4.40
   5   1  10   55.29    5.30
  -6  -1 -10  134.99    6.10
   6  -1  10  132.09    6.10
   6   1  10  131.69    7.00
  -6   1 -10  127.69    6.10
   6   1  10  127.39    6.20
  -7  -1 -10   41.00    3.20
   7  -1  10   44.60    3.40
  -7   1 -10   47.60    3.40
   7   1  10   43.40    3.30
   7   1  10   39.90    4.60
   8  -1  10  117.69    4.90
  -8  -1 -10  115.49    4.80
   8   1  10  125.69    5.00
  -8   1 -10  113.49    4.80
  -9  -1 -10  155.28    5.50
   9  -1  10  148.79    5.50
   9   1  10  154.68    5.50
  -9   1 -10  141.29    5.40
 -10  -1 -10   45.10    2.80
  10  -1  10   37.10    4.60
 -10   1 -10   52.29    3.10
  10   1  10   47.40    3.30
 -12  -2  10   24.00    2.40
 -12  -2  10   24.80    2.00
 -12   2  10   21.80    2.60
 -12   2  10   24.40    2.30
 -11  -2  10  107.39    4.60
 -11  -2  10  110.39    4.30
 -11   2  10  108.19    4.40
 -11   2  10  109.19    4.20
 -10  -2  10   13.80    2.40
 -10  -2  10   14.80    2.90
 -10   2  10   12.40    2.60
 -10   2  10   14.20    3.50
  -9  -2  10   39.90    3.90
  -9  -2  10   39.70    4.80
  -9   2  10   40.00    4.70
  -9   2  10   40.60    4.40
  -8  -2  10   66.19    5.60
  -8   2  10   60.69    5.10
  -8   2  10   64.19    4.30
  -8   2  10   62.39    5.60
  -7  -2  10  125.79    7.60
  -7  -2  10  134.79    6.30
  -7  -2  10  131.69    5.20
  -7   2  10  127.99    7.40
  -7   2  10  133.09    6.90
  -7   2  10  137.99    5.60
  -6  -2  10  332.17    9.40
  -6  -2  10  326.77   12.30
  -6   2  10  350.06    9.80
  -5  -2  10  501.65   14.00
  -5  -2  10  508.35   12.70
  -5   2  10  444.96   15.70
  -5   2  10  492.35   12.90
  -4  -2  10  279.47    9.40
  -4  -2  10  271.87    7.90
  -4   2  10  260.47    9.90
  -4   2  10  262.37    8.20
  -3  -2  10    0.60    1.60
  -3  -2  10   -1.80    1.70
  -3  -2  10   -1.00    2.70
  -3   2  10    3.00    2.70
  -3   2  10    0.20    2.90
  -3   2  10    1.30    1.90
  -2  -2  10  401.66   10.70
  -2  -2  10  393.46   11.40
  -2   2  10  417.66   11.50
  -2   2  10  388.66   10.90
  -2   2  10  398.86   12.10
  -1  -2  10   81.79    4.40
  -1  -2  10   79.09    4.10
  -1  -2  10   77.99    5.40
  -1   2  10   80.19    5.80
  -1   2  10   74.99    4.50
  -1   2  10   80.49    4.80
   0  -2 -10  388.76   10.90
   0  -2  10  371.56   10.20
   0  -2  10  363.76   11.50
   0  -2  10  367.86   10.90
   0   2  10  380.26   10.80
   0   2  10  365.16   10.60
   1  -2  10    0.80    2.00
   1  -2  10    1.40    1.70
   1  -2  10    1.50    2.60
   1   2  10    5.40    2.00
   1   2  10    0.80    2.50
   1   2  10    2.40    2.50
   2  -2  10 2151.98   49.80
   2  -2  10 2113.39   49.99
   2  -2  10 2111.99   48.80
  -2  -2 -10 2178.68   49.70
   2   2  10 2161.48   49.70
   2   2  10 2136.79   49.10
   2   2  10 2104.69   49.99
   3  -2  10   65.49    4.30
   3  -2  10   59.39    4.80
  -3  -2 -10   63.69    4.30
   3  -2  10   69.49    5.70
   3   2  10   65.79    4.40
   3   2  10   52.69    4.90
  -4  -2 -10 1042.40   25.00
   4  -2  10 1041.30   25.10
   4  -2  10  890.71   28.90
  -4   2 -10  999.30   24.80
   4   2  10 1011.90   25.20
   4   2  10 1008.70   25.00
   5  -2  10  250.07    8.50
  -5  -2 -10  241.08    8.30
  -5   2 -10  243.08    8.50
   5   2  10  236.78    8.70
   5   2  10  238.08    8.30
  -6  -2 -10  153.08    6.50
   6  -2  10  144.49    6.50
   6   2  10  156.08    6.90
  -6   2 -10  141.19    6.60
   6   2  10  151.08    6.50
  -7  -2 -10    2.20    1.60
   7  -2  10    5.40    1.80
   7   2  10    6.50    3.10
   7   2  10    4.20    1.60
  -7   2 -10    4.90    1.80
   8  -2  10   50.19    3.70
  -8  -2 -10   56.09    3.40
   8   2  10   56.39    3.40
  -8   2 -10   53.69    3.60
  -9  -2 -10    3.60    1.30
   9  -2  10    3.60    2.50
   9   2  10    4.60    1.60
  -9   2 -10    2.70    1.60
 -10  -2 -10    8.10    1.40
  10   2  10   10.80    1.70
 -10   2 -10    9.60    1.60
 -12  -3  10   33.40    2.10
 -12  -3  10   30.30    2.30
 -12   3  10   31.00    2.20
 -11  -3  10   18.00    2.20
 -11  -3  10   22.90    2.60
 -11   3  10   21.80    2.50
 -10  -3  10   76.29    5.80
 -10  -3  10   64.99    4.30
 -10   3  10   64.79    3.70
  -9  -3  10   29.60    4.50
  -9  -3  10   27.40    3.80
  -9   3  10   31.90    4.30
  -9   3  10   29.60    3.90
  -8  -3  10  116.59    6.50
  -8  -3  10  123.89    5.90
  -8   3  10  121.09    5.30
  -8   3  10  121.29    6.20
  -7  -3  10 1194.58   30.00
  -7  -3  10 1163.18   27.90
  -7  -3  10 1242.88   29.50
  -7   3  10 1163.98   29.30
  -7   3  10 1195.08   28.40
  -6  -3  10    6.90    2.70
  -6  -3  10    4.10    1.90
  -6   3  10    6.90    2.10
  -5  -3  10 1959.10   46.30
  -5  -3  10 1948.61   44.90
  -5   3  10 1976.60   45.30
  -4  -3  10    3.40    1.60
  -4  -3  10    4.20    2.70
  -4   3  10    5.20    3.80
  -4   3  10   -0.70    1.80
  -3  -3  10   11.70    2.90
  -3  -3  10    9.80    1.70
  -3   3  10   20.10    3.60
  -3   3  10    8.40    2.10
  -2  -3  10  795.92   19.90
  -2  -3  10  783.42   18.90
  -2   3  10  773.12   20.40
  -2   3  10  758.52   19.70
  -2   3  10  774.82   19.30
  -1  -3  10  301.57    8.50
  -1  -3  10  285.77    9.20
  -1   3  10  287.77    9.90
  -1   3  10  305.57    8.80
   0  -3  10  578.54   14.10
   0  -3  10  550.14   14.90
   0  -3 -10  499.15   14.70
   0   3  10  552.34   15.30
   0   3  10  561.44   14.80
   0   3  10  563.94   14.40
  -1  -3 -10  756.32   18.90
   1  -3  10  755.32   19.10
   1   3  10  725.43   18.50
   1   3  10  718.33   19.30
   1   3  10  736.23   18.90
   2  -3  10   39.90    3.70
  -2  -3 -10   39.70    3.60
   2  -3  10   34.60    3.60
   2   3  10   37.20    4.70
   2   3  10   37.80    4.00
   2   3  10   42.30    5.20
   3  -3  10  254.37    8.00
   3  -3  10  256.77    8.60
  -3  -3 -10  250.57    8.30
   3   3  10  247.58    8.40
   4  -3  10   12.40    2.30
  -4  -3 -10   19.70    3.40
   4   3  10   14.30    2.60
[truncated: 107,459 more chars]
